# Supplementary material for: Copper-Catalyzed Intramolecular Olefinic C(sp2)–H Amidation for the Synthesis of γ-Alkylidene-γ-lactams
Source: MDPI journal article supplement (doi:10.3390/molecules28186682), 2023-09-18

## Supplementary Materials

### Copper-Catalyzed Intramolecular Olefinic C(sp<sup>2</sup>)-H Amidation for the Synthesis of $\gamma$ -Alkylidene- $\gamma$ -lactams

Kanako Nozawa-Kumada<sup>1,2,\*</sup>, Masahito Hayashi<sup>1</sup>, Eunsang Kwon<sup>3,4</sup>, Masanori Shigeno<sup>1,5</sup>, Akira Yada<sup>2</sup> and Yoshinori Kondo<sup>1</sup>

- <sup>1</sup> Graduate School of Pharmaceutical Sciences, Tohoku University, 6-3 Aoba, Aramaki, Aoba-ku, Sendai, Miyagi 980-8578, Japan
- <sup>2</sup> Interdisciplinary Research Center for Catalytic Chemistry, National Institute of Advanced Industrial Science and Technology (AIST), Central 5, 1-1-1 Higashi, Tsukuba, Ibaraki 305-8565, Japan
- <sup>3</sup> Endowed Research Laboratory of Dimensional Integrated Nanomaterials, Graduate School of Science, Tohoku University, Aoba-ku, Sendai, Miyagi 980-8578, Japan
- <sup>4</sup> Research and Analytical Center for Giant Molecules, Graduate School of Science, Tohoku University, Aoba-ku, Sendai, Miyagi 980-8578, Japan
- <sup>5</sup> Japan Science and Technology Agency (JST), Precursory Research for Embryonic Science and Technology (PRESTO), Kawaguchi, Saitama 332-0012, Japan
- \* Correspondence: k.kumada@aist.go.jp; Tel.: +81-29-861-5908

## Table of Contents

|                                                                                                             |            |
|-------------------------------------------------------------------------------------------------------------|------------|
| <b>1. General comments</b>                                                                                  | <b>S3</b>  |
| <b>2. Materials</b>                                                                                         | <b>S3</b>  |
| <b>3. Preparation of starting materials</b>                                                                 | <b>S3</b>  |
| <b>4. General procedure for the synthesis of 5-alkylidene-pyrrolin-2-ones</b>                               | <b>S13</b> |
| <b>5. General procedure for the synthesis of 5-alkylidene-pyrrolidin-2-ones</b>                             | <b>S21</b> |
| <b>6. Mechanistic experiment</b>                                                                            | <b>S30</b> |
| <b>7. X-ray crystallographic data for 4a</b>                                                                | <b>S31</b> |
| <b>8. <math>^1\text{H}</math>-, <math>^{13}\text{C}</math>-, and <math>^{19}\text{F}</math>-NMR spectra</b> | <b>S34</b> |

## 1. General comments

Melting points were measured with a Yazawa micro melting point apparatus and uncorrected. IR spectra were recorded on a SHIMADZU IRAffinity.  $^1\text{H}$  NMR spectra were recorded on a JEOL JNMAL400 (400 MHz) spectrometer or a JEOL ECA600 (600 MHz) spectrometer. Chemical shifts are expressed in  $\delta$  (parts per million, ppm) values and coupling constants are expressed in hertz (Hz).  $^1\text{H}$  NMR spectra were referenced to tetramethylsilane as an internal standard or to a solvent signal ( $\text{CDCl}_3$ : 7.26 ppm,  $\text{DMSO}-d_6$ : 2.49 ppm).  $^{13}\text{C}$  NMR spectra were referenced to a solvent signal ( $\text{CDCl}_3$ : 77.0 ppm,  $\text{DMSO}-d_6$ : 39.5 ppm).  $^{19}\text{F}$  NMR spectra were referenced to 4-fluorotoluene as an internal standard (−118.0 ppm). All NMR spectra were measured at 25 °C using a 5 mm diameter glass NMR tube. The following abbreviations are used: s = singlet, d = doublet, t = triplet, q = quartet, dd, = double doublet, m = multiplet, and br.s. = broad singlet. Low and high resolution mass spectra (LRMS and HRMS) were obtained from Mass Spectrometry Resource, Graduate School of Pharmaceutical Sciences, Tohoku University, on a JEOL JMS-DX 303 and JMS700/JMS-T 100 GC spectrometer. HRMS were performed using polyethylene glycol (PEG) or perfluorokerosene (PEK) as an internal standard and 3-nitrobenzyl alcohol (3-NBA) or glycerol (GLY) as matrix. The Bruker D8 VENTURE x-ray diffractometer was used to determine the structure of the grown crystals.

## 2. Materials

Materials were purchased from Tokyo Kasei Co., Aldrich Inc. and other commercial suppliers and were used as received. Flash column chromatography was performed with Kanto silica gel 60 N (spherical, neutral, 70–230 mesh).

## 3. Preparation of starting materials

### Method A

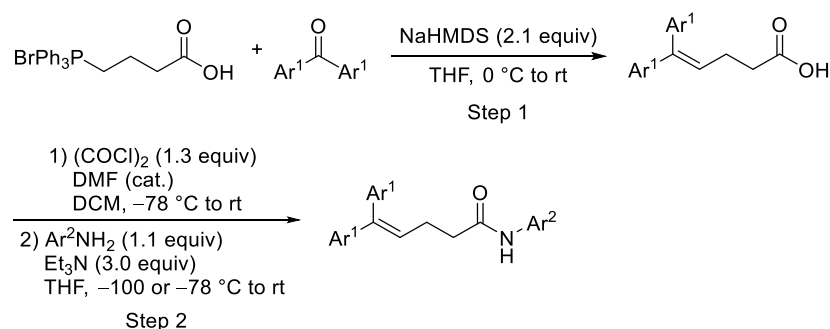

Step 1: (3-Carboxypropyl)triphenylphosphonium bromide (2.1 g, 5.0 mmol) was suspended in THF (20 mL). The colorless suspension was cooled to 0 °C and NaHMDS (1.1 M in hexane, 12.5 mL, 13.8 mmol) was added dropwise. Then, the resulting bright orange solution was stirred at 0 °C for 30 min. To the reaction mixture was added a solution of ketone (6.0 mmol) in THF (10

mL) dropwise at 0 °C and the reaction mixture was stirred overnight at rt. The reaction mixture was diluted with 1M HCl to pH 1, then extracted with AcOEt (20 mL x 3). The organic layers were washed with brine (10 mL) and dried over MgSO<sub>4</sub>. The solvent was removed under reduced pressure and the residue was purified by SiO<sub>2</sub> column chromatography (eluent: hexane/AcOEt = 3/1).

Step 2: To a solution of the carboxylic acid (3.0 mmol) in dichloromethane (10 mL) were added dimethylformamide (2 drops) and oxalyl chloride (0.53 mL, 3.8 mmol) at -78 °C under N<sub>2</sub> atmosphere. The resulting mixture was stirred overnight at rt. The solvent was then removed under reduced pressure to afford the corresponding crude acyl chloride. To a stirred solution of the acyl chloride in THF (10 mL), aniline derivative (3.6 mmol) and triethylamine (1.3 mL, 9.0 mmol) were added dropwise using a dropping funnel at -100 or -78 °C. After complete addition, the reaction mixture was stirred for 6 h at rt. The solvent was then removed under reduced pressure and 3 M HCl aq. (10 mL) was added to the mixture. The resulting solution was extracted with AcOEt (10 mL x 3). The organic layers were washed with sat. Na<sub>2</sub>CO<sub>3</sub> aq. (10 mL) and brine (10 mL). The solvent was dried over MgSO<sub>4</sub> and removed under reduced pressure. The residue was recrystallization to give the corresponding amide compound.

## Method B

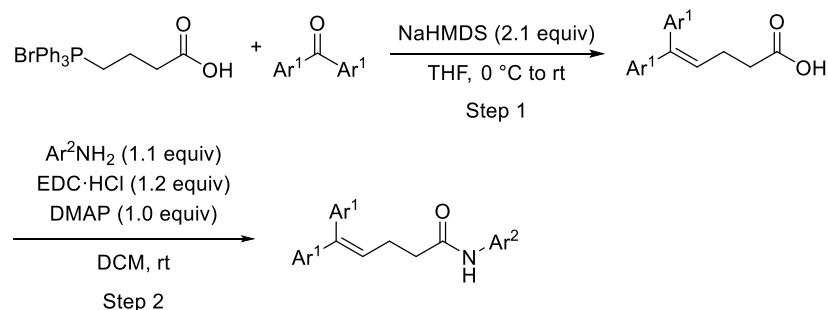

Step 1: (3-Carboxypropyl)triphenylphosphonium bromide (2.1 g, 5.0 mmol) was suspended in THF (20 mL). The colorless suspension was cooled to 0 °C and NaHMDS (1.1 M in hexane, 12.5 mL, 13.8 mmol) was added dropwise. Then, the resulting bright orange solution was stirred at 0 °C for 30 min. To the reaction mixture was added a solution of ketone (6.0 mmol) in THF (10 mL) dropwise at 0 °C and the reaction mixture was stirred overnight at rt. The reaction mixture was diluted with 1M HCl to pH 1, then extracted with AcOEt (10 mL x 3). The organic layers were washed with brine (15 mL) and dried over MgSO<sub>4</sub>. The solvent was removed under reduced pressure and the residue was purified by SiO<sub>2</sub> column chromatography (eluent: hexane/AcOEt = 3/1).

Step 2: To a solution of the carboxylic acid (3.0 mmol) in dichloromethane (10 mL) were added EDC·HCl (690.1 mg, 3.6 mmol), *N,N*-dimethylaminopyridine (366.5 mg, 3.0 mmol), and amine



(3.3 mmol) at rt under N<sub>2</sub> atmosphere. The resulting mixture was stirred overnight at rt. After completion of the reaction, water (10 mL) was added to the reaction mixture. The resulting solution was extracted with AcOEt (20 mL x 3). The organic layers were washed with brine (10 mL). The solvent was dried over MgSO<sub>4</sub> and removed under reduced pressure. The residue was recrystallization to give the corresponding amide compound.

### Method C

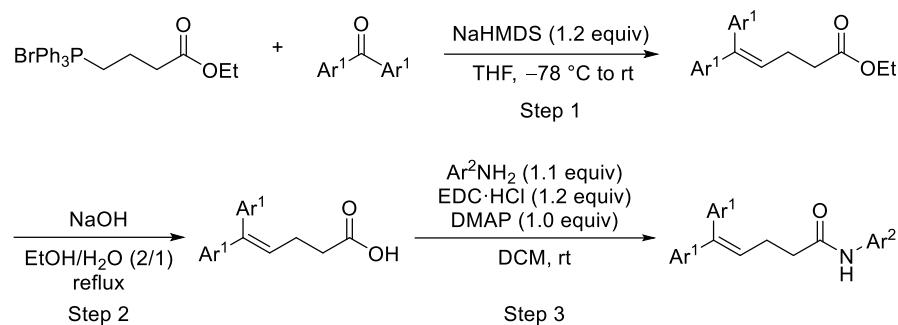

Step 1: (3-Ethoxycarbonylpropyl)triphenylphosphonium bromide (457.0 mg, 1.0 mmol) was suspended in THF (5 mL). The colorless suspension was cooled to -78 °C and NaHMDS (1.1 M in hexane, 1.2 mL, 1.2 mmol) was added dropwise. Then, the resulting bright orange solution was stirred at 0 °C for 30 min. To the reaction mixture was added a solution of ketone (1.1 mmol) in THF (5 mL) dropwise at 0 °C and the reaction mixture was stirred overnight at rt. The reaction mixture was diluted with 1M HCl (10 mL) and extracted with AcOEt (10 mL x 3). The organic layers were washed with brine (15 mL) and dried over MgSO<sub>4</sub>. The solvent was removed under reduced pressure and the residue was purified by SiO<sub>2</sub> column chromatography (eluent: hexane/AcOEt = 3/1).

Step 2: After the purification, to a solution of the ester (1.0 mmol) in EtOH (10 mL) were added NaOH (2.0 g) and H<sub>2</sub>O (5 mL) at rt under air atmosphere. The resulting mixture was stirred at reflux overnight. After completion of the reaction, the mixture was cooled to rt and diluted with water (10 mL) and conc. HCl (10 mL). The resulting solution was extracted with AcOEt (10 mL x 3). The organic layers were washed with brine (10 mL). The solvent was dried over MgSO<sub>4</sub> and removed under reduced pressure. The residue was purified by SiO<sub>2</sub> column chromatography (eluent: hexane/AcOEt = 2/1).

Step 3: The next amidation was conducted according to Step 2 of Method B.

### ***N*,5,5-Triphenylpent-4-enamide (1a)**

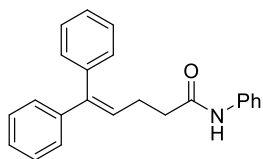

Prepared according to Method A, 2.0 g (60% over 2 steps, 10.0 mmol scale), recrystallized from DCM/hexane, colorless needles, mp. 139–140 °C.

$^1\text{H}$  NMR (400 MHz,  $\text{CDCl}_3/\text{TMS}$ )  $\delta$  (ppm): 7.47 (2H, d,  $J = 7.8$  Hz), 7.38–7.18 (12H, m), 7.11–7.04 (2H, m), 6.13 (1H, t,  $J = 7.6$  Hz), 2.56 (2H, t,  $J = 7.2$  Hz), 2.48 (2H, t,  $J = 7.2$  Hz);  $^{13}\text{C}\{^1\text{H}\}$  NMR (100 MHz,  $\text{CDCl}_3/\text{TMS}$ )  $\delta$  (ppm): 170.4, 143.2, 142.2, 139.6, 137.8, 129.7, 128.9, 128.3, 128.1, 127.23, 127.19, 127.1, 124.2, 119.8, 111.3, 37.6, 25.8; LRMS (EI)  $m/z$ : 327 ( $\text{M}^+$ ); HRMS (EI-TOF) Calcd. for  $\text{C}_{23}\text{H}_{21}\text{NO}$ : 327.1623, found: 327.1606; IR (neat): 3317, 3296, 1656, 1601, 1542, 1533, 1490, 1442, 763, 755, 743  $\text{cm}^{-1}$ .

### **5,5-Bis(4-methoxyphenyl)-*N*-phenylpent-4-enamide (1b)**

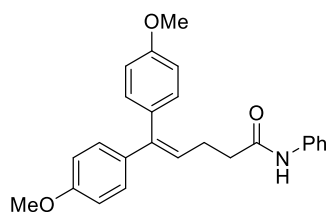

Prepared according to Method A, 1.2 g (61% over 2 steps, 5.0 mmol scale), recrystallized from DCM/hexane, colorless powder, mp. 158–160 °C.

$^1\text{H}$  NMR (600 MHz,  $\text{CDCl}_3/\text{TMS}$ )  $\delta$  (ppm): 7.46 (2H, d,  $J = 7.6$  Hz), 7.29 (2H, t,  $J = 7.9$  Hz), 7.18–7.13 (3H, m), 7.10–7.06 (3H, m), 6.89 (2H, d,  $J = 8.9$  Hz), 6.79 (2H, d,  $J = 8.2$  Hz), 5.96 (1H, t,  $J = 7.2$  Hz), 3.82 (3H, s), 3.78 (3H, s), 2.55 (2H, q,  $J = 7.4$  Hz), 2.45 (2H, t,  $J = 7.4$  Hz);  $^{13}\text{C}\{^1\text{H}\}$  NMR (150 MHz,  $\text{CDCl}_3/\text{TMS}$ )  $\delta$  (ppm): 170.4, 158.9, 158.7, 142.4, 137.8, 135.3, 132.1, 130.9, 129.0, 128.4, 125.3, 124.2, 119.8, 113.7, 113.5, 55.3, 55.2, 37.9, 25.8; LRMS (EI)  $m/z$ : 387 ( $\text{M}^+$ ); HRMS (EI-TOF) Calcd. for  $\text{C}_{25}\text{H}_{25}\text{NO}_3$ : 387.1834, found: 387.1820; IR (neat): 3296, 2834, 1649, 1607, 1509, 1439, 1247, 1176, 1031, 837  $\text{cm}^{-1}$ .

### ***N*-Phenyl-5,5-di-*p*-tolylpent-4-enamide (1c)**

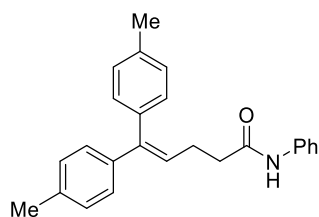

Prepared according to Method B, 230.2 mg (22% over 2 steps, 3.0 mmol scale), recrystallized from DCM/hexane, colorless plates, mp. 119–120 °C.

$^1\text{H}$  NMR (600 MHz,  $\text{CDCl}_3/\text{TMS}$ )  $\delta$  (ppm): 7.46 (2H, d,  $J = 8.0$  Hz), 7.29 (2H, t,  $J = 7.8$  Hz), 7.17 (2H, d,  $J = 7.5$  Hz), 7.11–7.05 (8H, m), 6.04 (1H, t,  $J = 7.5$  Hz), 2.55 (2H, q,  $J = 7.3$  Hz), 2.45 (2H, t,  $J = 7.3$  Hz), 2.37 (3H, s), 2.31 (3H, s);  $^{13}\text{C}\{^1\text{H}\}$  NMR (150 MHz,  $\text{CDCl}_3/\text{TMS}$ )  $\delta$  (ppm): 170.4, 143.1, 139.7, 137.8, 136.9, 136.81, 136.79, 129.7, 129.00, 128.96, 128.8, 127.2, 126.1, 124.2, 119.8, 37.8, 25.8, 21.2, 21.0; LRMS (EI)  $m/z$ : 355 ( $\text{M}^+$ ); HRMS (EI-EB) Calcd. for  $\text{C}_{25}\text{H}_{25}\text{NO}$ : 355.1936, found: 355.1941; IR (neat): 3290, 3017, 2861, 1649, 1600, 1526, 1443, 817  $\text{cm}^{-1}$ .

#### 5,5-Bis(4-fluorophenyl)-*N*-phenylpent-4-enamide (1d)

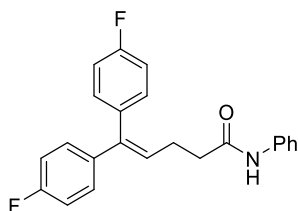

Prepared according to Method A, 1.0 g (57% over 2 steps, 5.0 mmol scale), recrystallized from DCM /hexane, colorless needles, mp. 133–135 °C.

$^1\text{H}$  NMR (400 MHz,  $\text{CDCl}_3/\text{TMS}$ )  $\delta$  (ppm): 7.47 (2H, d,  $J = 8.3$  Hz), 7.30 (2H, t,  $J = 8.1$  Hz), 7.18–7.03 (8H, m), 6.94 (2H, t,  $J = 8.8$  Hz), 6.04 (1H, t,  $J = 7.1$  Hz), 2.55–2.44 (4H, m);  $^{13}\text{C}\{^1\text{H}\}$  NMR (100 MHz,  $\text{CDCl}_3/\text{TMS}$ )  $\delta$  (ppm): 170.3, 162.1 ( $^1J_{\text{C-F}} = 245.3$  Hz), 162.0 ( $^1J_{\text{C-F}} = 245.3$  Hz), 141.1, 138.3 ( $^4J_{\text{C-F}} = 3.3$  Hz), 137.7, 135.3 ( $^4J_{\text{C-F}} = 3.3$  Hz), 131.3 ( $^3J_{\text{C-F}} = 8.2$  Hz), 128.9, 128.8 ( $^3J_{\text{C-F}} = 8.2$  Hz), 127.5, 124.3, 119.8, 115.3 ( $^2J_{\text{C-F}} = 20.6$  Hz), 115.0 ( $^2J_{\text{C-F}} = 21.4$  Hz), 37.4, 25.7;  $^{19}\text{F}$  NMR (565 MHz,  $\text{CDCl}_3$ )  $\delta$  (ppm): –114.0, –114.7; LRMS(EI)  $m/z$ : 363 ( $\text{M}^+$ ); HRMS (EI-TOF) Calcd. for  $\text{C}_{23}\text{H}_{19}\text{F}_2\text{NO}$  ( $\text{M}^+$ ): 363.1435, found: 363.1423; IR (neat): 3286, 1654, 1601, 1506, 1501, 1222, 843, 749, 742  $\text{cm}^{-1}$ .

#### 5,5-Bis(4-chlorophenyl)-*N*-phenylpent-4-enamide (1e)

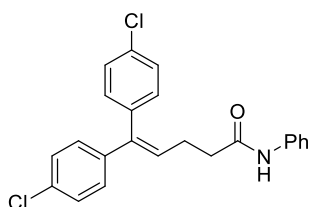

Prepared according to Method A, 1.3 g (65% over 2 steps, 5.0 mmol scale), recrystallized from DCM/hexane, colorless needles, mp. 148–149 °C.

$^1\text{H}$  NMR (600 MHz, DMSO- $d_6$ )  $\delta$  (ppm): 9.89 (1H, br.s), 7.60–7.52 (2H, m), 7.45 (2H, d,  $J$  = 6.8 Hz), 7.34–7.33 (2H, m), 7.27 (2H, t,  $J$  = 7.9 Hz), 7.16–7.14 (4H, m), 7.00 (1H, t,  $J$  = 7.6 Hz), 6.19 (1H, t,  $J$  = 7.6 Hz), 2.45–2.43 (2H, m), 2.35–2.34 (2H, m);  $^{13}\text{C}\{^1\text{H}\}$  NMR (150 MHz, DMSO- $d_6$ )  $\delta$  (ppm): 170.3, 140.4, 139.2, 139.1, 137.7, 132.1, 131.8, 131.3, 129.8, 128.6, 128.52, 128.48, 128.3, 123.0, 119.0, 36.1, 25.7; LRMS (EI)  $m/z$ : 395 ( $\text{M}^+$ ); HRMS(EI-TOF) Calcd. for  $\text{C}_{23}\text{H}_{19}^{35}\text{Cl}_2\text{NO}$ : 395.0844, found: 395.0816; IR (neat): 3299, 1654, 1600, 1521, 1488, 1442, 1093, 1016, 828, 759, 753  $\text{cm}^{-1}$ .

***N*-Phenyl-5,5-bis(4-(trifluoromethyl)phenyl)pent-4-enamide (1f)**

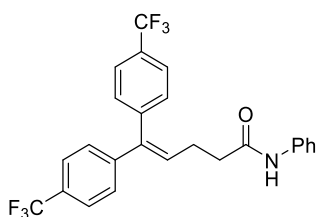

Prepared according to Method A, 665.5 mg (29% over 2 steps, 5.0 mmol scale), recrystallized from DCM/hexane, colorless needles, mp. 153–155  $^{\circ}\text{C}$ .

$^1\text{H}$  NMR (600 MHz,  $\text{CDCl}_3/\text{TMS}$ )  $\delta$  (ppm): 7.64 (2H, d,  $J$  = 8.2 Hz), 7.51 (2H, d,  $J$  = 8.9 Hz), 7.47 (2H, d,  $J$  = 8.2 Hz), 7.32–7.26 (6H, m), 7.11 (2H, t,  $J$  = 7.2 Hz), 6.26 (1H, t,  $J$  = 7.2 Hz), 2.56 (2H, q,  $J$  = 7.1 Hz), 2.50 (2H, t,  $J$  = 7.1 Hz);  $^{13}\text{C}\{^1\text{H}, ^{19}\text{F}\}$  NMR (150 MHz,  $\text{CDCl}_3/\text{TMS}$ )  $\delta$  (ppm): 169.8, 144.9, 142.7, 140.9, 137.6, 130.6, 130.1, 129.8, 129.4, 129.1, 127.4, 125.6, 125.3, 124.5, 124.11, 124.07, 119.8, 37.1, 25.7;  $^{19}\text{F}$  NMR (565 MHz,  $\text{CDCl}_3/\text{TMS}$ )  $\delta$  (ppm): –61.87, –61.89; LRMS (EI)  $m/z$ : 463 ( $\text{M}^+$ ); HRMS (EI-TOF) Calcd. for  $\text{C}_{25}\text{H}_{19}\text{F}_6\text{NO}$ : 463.1371, found: 463.1399; IR (neat): 3312, 1658, 1600, 1532, 1501, 1324, 1104, 1068, 834, 707  $\text{cm}^{-1}$ .

***N*-Phenyl-4-(9*H*-xanthen-9-ylidene)butanamide (1g)**

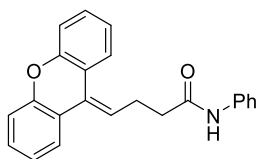

Prepared according to Method C, 142.4 mg (14% over 3 steps, 3.0 mmol scale), recrystallized from DCM/hexane, colorless needles, mp. 141–143  $^{\circ}\text{C}$ .

$^1\text{H}$  NMR (600 MHz,  $\text{CDCl}_3/\text{TMS}$ )  $\delta$  (ppm): 7.58 (1H, d,  $J$  = 7.5 Hz), 7.52 (1H, d,  $J$  = 7.5 Hz), 7.49 (2H, d,  $J$  = 8.0 Hz), 7.33–7.29 (3H, m), 7.27–7.24 (1H, m), 7.18–7.09 (6H, m), 5.87 (1H, t,  $J$  = 7.0 Hz), 3.01 (2H, q,  $J$  = 7.4 Hz), 2.58 (2H, t,  $J$  = 7.4 Hz);  $^{13}\text{C}\{^1\text{H}\}$  NMR (150 MHz,  $\text{CDCl}_3/\text{TMS}$ )  $\delta$  (ppm): 170.2, 152.9, 151.3, 137.7, 129.0, 128.8, 128.3, 127.9, 127.6, 125.4, 124.3, 123.9, 123.8, 123.5, 122.9, 122.2, 119.8, 116.7, 116.5, 38.0, 25.6; LRMS (EI)  $m/z$ : 341 ( $\text{M}^+$ );

HRMS (EI-TOF) Calcd. for  $C_{23}H_{19}NO_2$ : 341.1416, found: 341.1413; IR (neat): 3293, 1648, 1601, 1477, 1451, 1256, 868  $cm^{-1}$ .

**4-(5*H*-Dibenzo[*a,d*][7]annulen-5-ylidene)-*N*-phenylbutanamide (1h)**

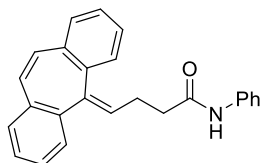

Prepared according to Method A, 607.9 mg (35% over 2 steps, 5.0 mmol scale), recrystallized from DCM/hexane, colorless crystals, mp. 164–167 °C.

$^1H$  NMR (600 MHz,  $CDCl_3$ /TMS)  $\delta$  (ppm): 7.43 (2H, d,  $J = 7.6$  Hz), 7.36–7.24 (10H, m), 7.08 (1H, t,  $J = 7.6$  Hz), 7.01 (1H, br.s), 6.84–6.80 (2H, m), 5.60 (1H, dd,  $J = 9.0, 5.5$  Hz), 2.65–2.61 (1H, m), 2.50–2.46 (1H, m), 2.40–2.35 (2H, m);  $^{13}C\{^1H\}$  NMR (150 MHz,  $CDCl_3$ /TMS)  $\delta$  (ppm): 170.2, 143.0, 142.2, 137.7, 136.9, 134.7, 133.9, 131.7, 131.2, 131.0, 128.9, 128.80, 128.78, 128.7, 128.25, 128.18, 127.6, 127.1, 127.0, 124.2, 119.9, 37.6, 24.7; LRMS (EI)  $m/z$ : 351 ( $M^+$ ); HRMS (EI-TOF) Calcd. for  $C_{25}H_{21}NO$ : 351.1623, found: 351.1605; IR (neat): 3019, 1704, 1487, 1432, 1208, 924, 796  $cm^{-1}$ .

***N*-(4-Methoxyphenyl)-5,5-diphenylpent-4-enamide (1i)**

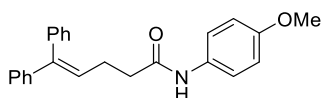

Prepared according to Method A, 1.0 g (58% over 2 steps, 5.0 mmol scale), recrystallized from DCM/hexane, colorless powder, mp. 144–147 °C.

$^1H$  NMR (600 MHz,  $CDCl_3$ /TMS)  $\delta$  (ppm): 7.36–7.34 (4H, m), 7.31–7.28 (2H, m), 7.25–7.19 (5H, m), 7.16 (2H, d,  $J = 7.5$  Hz), 6.81 (2H, d,  $J = 8.9$  Hz), 6.10 (1H, t,  $J = 7.2$  Hz), 3.75 (3H, s), 2.53 (2H, q,  $J = 7.6$  Hz), 2.42 (2H, t,  $J = 7.6$  Hz);  $^{13}C\{^1H\}$  NMR (150 MHz,  $CDCl_3$ /TMS)  $\delta$  (ppm): 170.2, 156.3, 143.1, 142.3, 139.7, 130.9, 129.7, 128.3, 128.1, 127.4, 127.24, 127.18, 127.1, 121.7, 114.1, 55.4, 37.4, 25.8; LRMS (EI)  $m/z$ : 357 ( $M^+$ ); HRMS (EI-TOF) Calcd. for  $C_{24}H_{23}NO_2$  ( $M^+$ ): 357.1729, found: 357.1721; IR (neat): 3288, 2835, 1652, 1609, 1510, 1246, 1031, 831  $cm^{-1}$ ;

**5,5-Diphenyl-*N*-(*p*-tolyl)pent-4-enamide (1j)**

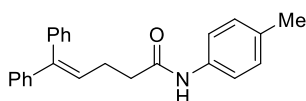

Prepared according to Method A, 1.2 g (69% over 2 steps, 5.0 mmol scale), recrystallized from DCM/hexane, colorless crystals, mp. 136–138 °C.

$^1\text{H}$  NMR (600 MHz,  $\text{CDCl}_3/\text{TMS}$ )  $\delta$  (ppm): 7.37–7.30 (5H, m), 7.26–7.24 (2H, m), 7.22–7.20 (3H, m), 7.17 (2H, d,  $J = 7.0$  Hz), 7.12 (1H, br.s), 7.09 (2H, d,  $J = 8.0$  Hz), 6.11 (1H, t,  $J = 7.3$  Hz), 2.54 (2H, q,  $J = 7.4$  Hz), 2.44 (2H, t,  $J = 7.4$  Hz), 2.29 (3H, s);  $^{13}\text{C}\{^1\text{H}\}$  NMR (150 MHz,  $\text{CDCl}_3/\text{TMS}$ )  $\delta$  (ppm): 170.2, 143.2, 142.3, 139.7, 135.2, 133.8, 129.8, 129.4, 128.3, 128.1, 127.3, 127.25, 127.20, 127.1, 119.9, 37.6, 25.8, 20.8; LRMS (EI)  $m/z$ : 341 ( $\text{M}^+$ ); HRMS (EI-TOF) Calcd. for  $\text{C}_{24}\text{H}_{23}\text{NO}$ : 341.1780, found: 341.1762; IR (neat): 3293, 1655, 1601, 1525, 1496, 1442, 817, 764  $\text{cm}^{-1}$ .

#### ***N*-(4-Isopropylphenyl)-5,5-diphenylpent-4-enamide (1k)**

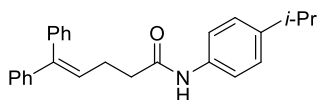

Prepared according to Method A, 873.9 mg (47% over 2 steps, 5.0 mmol scale), recrystallized from DCM/hexane, colorless powder, mp. 105–106 °C.

$^1\text{H}$  NMR (600 MHz,  $\text{CDCl}_3/\text{TMS}$ )  $\delta$  (ppm): 7.38–7.35 (4H, m), 7.31 (1H, t,  $J = 7.6$  Hz), 7.26–7.14 (9H, m), 7.09 (1H, br.s), 6.11 (1H, t,  $J = 7.4$  Hz), 2.86 (1H, sep,  $J = 6.8$  Hz), 2.55 (2H, q,  $J = 7.4$  Hz), 2.45 (2H, t,  $J = 7.4$  Hz), 1.22 (6H, d,  $J = 6.8$  Hz);  $^{13}\text{C}\{^1\text{H}\}$  NMR (150 MHz,  $\text{CDCl}_3/\text{TMS}$ )  $\delta$  (ppm): 170.2, 145.0, 143.2, 142.3, 139.7, 135.4, 129.8, 128.3, 128.1, 127.31, 127.26, 127.2, 127.1, 126.8, 120.0, 37.6, 33.6, 25.8, 24.0; LRMS (EI)  $m/z$ : 369 ( $\text{M}^+$ ); HRMS (EI-TOF) Calcd. for  $\text{C}_{26}\text{H}_{27}\text{NO}$ : 369.2093, found: 369.2082; IR (neat): 3296, 2962, 1652, 1598, 1516, 1256, 831, 773  $\text{cm}^{-1}$ .

#### ***N*-(4-Fluorophenyl)-5,5-diphenylpent-4-enamide (1l)**

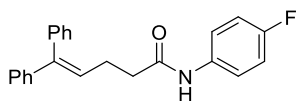

Prepared according to Method A, 1.2 g (70% over 2 steps, 5.0 mmol scale), recrystallized from DCM/hexane, colorless needles, mp. 120–122 °C.

$^1\text{H}$  NMR (600 MHz,  $\text{CDCl}_3/\text{TMS}$ )  $\delta$  (ppm): 7.40 (2H, dd,  $J = 8.9, 4.8$  Hz), 7.36 (2H, t,  $J = 7.2$  Hz), 7.32–7.29 (1H, m), 7.26–7.19 (6H, m), 7.16 (2H, d,  $J = 6.9$  Hz), 6.97 (2H, t,  $J = 8.9$  Hz), 6.09 (1H, t,  $J = 7.3$  Hz), 2.54 (2H, q,  $J = 7.3$  Hz), 2.44 (2H, t,  $J = 7.3$  Hz);  $^{13}\text{C}\{^1\text{H}\}$  NMR (150 MHz,  $\text{CDCl}_3/\text{TMS}$ )  $\delta$  (ppm): 170.5, 159.3 ( $^1J_{\text{C-F}} = 242.0$  Hz), 143.3, 142.2, 139.6, 133.81, 133.79, 129.7, 128.3, 128.1, 127.21, 127.16, 127.13, 121.7 ( $^3J_{\text{C-F}} = 7.7$  Hz), 115.5 ( $^2J_{\text{C-F}} = 22.3$  Hz), 37.4, 25.8;  $^{19}\text{F}$  NMR (565 MHz,  $\text{CDCl}_3$ )  $\delta$  (ppm): –117.4; LRMS (EI)  $m/z$ : 345 ( $\text{M}^+$ ); HRMS (EI-TOF)

Calcd. for C<sub>23</sub>H<sub>20</sub>FNO: 345.1529, found: 345.1514; IR (neat): 3303, 1660, 1506, 1407, 1210, 831 cm<sup>-1</sup>.

***N*-(4-Chlorophenyl)-5,5-diphenylpent-4-enamide (1m)**

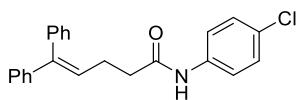

Prepared according to Method A, 631.1 mg (35% over 2 steps, 5.0 mmol scale), recrystallized from DCM/hexane, colorless needles, mp. 135–138 °C.

<sup>1</sup>H NMR (600 MHz, CDCl<sub>3</sub>/TMS) δ (ppm): 7.41 (2H, d, *J* = 8.3 Hz), 7.38–7.35 (2H, m), 7.33–7.30 (1H, m), 7.27–7.16 (9H, m), 7.12 (1H, br.s), 6.10 (1H, t, *J* = 7.4 Hz), 2.55 (2H, q, *J* = 7.4 Hz), 2.46 (2H, t, *J* = 7.4 Hz); <sup>13</sup>C{<sup>1</sup>H} NMR (150 MHz, CDCl<sub>3</sub>/TMS) δ (ppm): 170.3, 143.4, 142.2, 139.6, 136.3, 129.7, 129.2, 129.0, 128.4, 128.2, 127.3, 127.24, 127.22, 127.0, 121.0, 37.6, 25.7; LRMS (EI) *m/z*: 361 (M<sup>+</sup>); HRMS (EI-TOF) Calcd. for C<sub>23</sub>H<sub>20</sub><sup>35</sup>ClNO (M<sup>+</sup>): 361.1233, found: 361.1204; IR (neat): 3310, 1660, 1594, 1515, 1491, 1397, 1091, 821 cm<sup>-1</sup>.

***N*-(4-Bromophenyl)-5,5-diphenylpent-4-enamide (1n)**

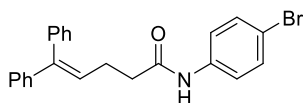

Prepared according to Method A, 1.0 g (49% over 2 steps, 5.0 mmol scale), recrystallized from DCM/hexane, yellow plates, mp. 156–158 °C.

<sup>1</sup>H NMR (600 MHz, CDCl<sub>3</sub>/TMS) δ (ppm): 7.40–7.35 (6H, m), 7.32–7.30 (1H, m), 7.26–7.19 (6H, m), 7.16 (2H, d, *J* = 7.6 Hz), 6.09 (1H, t, *J* = 7.3 Hz), 2.54 (2H, q, *J* = 7.3 Hz), 2.45 (2H, t, *J* = 7.3 Hz); <sup>13</sup>C{<sup>1</sup>H} NMR (150 MHz, CDCl<sub>3</sub>/TMS) δ (ppm): 170.4, 143.43, 143.42, 142.1, 139.6, 136.8, 131.9, 129.7, 128.4, 128.1, 127.3, 127.2, 127.0, 121.3, 116.8, 37.6, 25.7; LRMS (EI) *m/z*: 405 (M<sup>+</sup>); HRMS (EI-TOF) Calcd. for C<sub>23</sub>H<sub>20</sub><sup>79</sup>BrNO: 405.0728, found: 405.0701; IR (neat): 3291, 1659, 1598, 1521, 1490, 1396, 1303, 1070 cm<sup>-1</sup>.

**5,5-Diphenyl-*N*-(4-(trifluoromethyl)phenyl)pent-4-enamide (1o)**

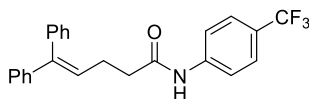

Prepared according to Method B, 1.1 g (58% over 2 steps, 5.0 mmol scale), recrystallized from DCM/hexane, colorless needles, mp. 124–126 °C.

$^1\text{H}$  NMR (600 MHz,  $\text{CDCl}_3/\text{TMS}$ )  $\delta$  (ppm): 7.59 (2H, d,  $J = 8.9$  Hz), 7.55 (2H, d,  $J = 8.3$  Hz), 7.37 (2H, t,  $J = 7.6$  Hz), 7.33–7.31 (1H, m), 7.27–7.20 (6H, m), 7.18–7.16 (2H, m), 6.11 (1H, t,  $J = 7.1$  Hz), 2.56 (2H, q,  $J = 7.1$  Hz), 2.49 (2H, t,  $J = 7.1$  Hz);  $^{13}\text{C}\{^1\text{H}, ^{19}\text{F}\}$  NMR (150 MHz,  $\text{CDCl}_3/\text{TMS}$ )  $\delta$  (ppm): 170.7, 143.6, 142.1, 140.8, 139.6, 129.7, 128.4, 128.2, 127.3, 127.25, 127.22, 126.8, 126.2, 126.0, 124.0, 119.3, 37.7, 25.6;  $^{19}\text{F}$  NMR (565 MHz,  $\text{CDCl}_3/\text{TMS}$ )  $\delta$  (ppm): –61.5; LRMS (EI)  $m/z$ : 395 ( $\text{M}^+$ ); HRMS (EI-TOF) Calcd. for  $\text{C}_{24}\text{H}_{20}\text{F}_3\text{NO}$  ( $\text{M}^+$ ): 395.1497, found: 395.1490; IR (neat): 3333, 1669, 1601, 1522, 1326, 1112, 1067, 1017, 833  $\text{cm}^{-1}$ .

#### ***N*-(4-Cyanophenyl)-5,5-diphenylpent-4-enamide (1p)**

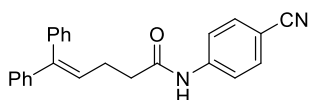

Prepared according to Method B, 755.5 mg (42% over 2 steps, 5.0 mmol scale), recrystallized from DCM/hexane, colorless powder, mp. 142–143  $^{\circ}\text{C}$ .

$^1\text{H}$  NMR (600 MHz,  $\text{CDCl}_3/\text{TMS}$ )  $\delta$  (ppm): 7.61–7.58 (4H, m), 7.37 (2H, t,  $J = 7.2$  Hz), 7.34–7.31 (1H, m), 7.27–7.23 (4H, m), 7.20 (2H, d,  $J = 8.3$  Hz), 7.17–7.16 (2H, m), 6.10 (1H, t,  $J = 7.2$  Hz), 2.56 (2H, q,  $J = 7.2$  Hz), 2.51 (2H, t,  $J = 7.2$  Hz);  $^{13}\text{C}\{^1\text{H}\}$  NMR (150 MHz,  $\text{CDCl}_3/\text{TMS}$ )  $\delta$  (ppm): 170.6, 143.7, 142.0, 141.8, 139.5, 133.3, 129.7, 128.4, 128.2, 127.34, 127.32, 127.2, 126.6, 119.4, 118.8, 107.1, 37.8, 25.5; LRMS (EI)  $m/z$ : 352 ( $\text{M}^+$ ); HRMS (EI-TOF) Calcd. for  $\text{C}_{24}\text{H}_{20}\text{N}_2\text{O}$ : 352.1576, found: 352.1583; IR (neat): 3106, 2220, 1665, 1594, 1498, 1408, 1173  $\text{cm}^{-1}$ .

#### **Methyl 4-(5,5-diphenylpent-4-enamido)benzoate (1q)**

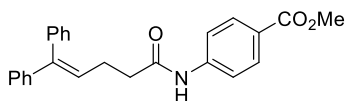

Prepared according to Method A, 927.1 mg (48% over 2 steps, 5.0 mmol scale), recrystallized from DCM/hexane, colorless needles, mp. 120–123  $^{\circ}\text{C}$ .

$^1\text{H}$  NMR (600 MHz,  $\text{DMSO}-d_6$ )  $\delta$  (ppm): 10.3 (1H, s), 7.89 (2H, d,  $J = 9.0$  Hz), 7.70 (2H, d,  $J = 9.0$  Hz), 7.39 (2H, t,  $J = 7.5$  Hz), 7.33 (1H, t,  $J = 7.5$  Hz), 7.27 (2H, t,  $J = 7.3$  Hz), 7.21 (1H, t,  $J = 7.3$  Hz), 7.15–7.12 (4H, m), 6.12 (1H, t,  $J = 7.4$  Hz), 3.80 (3H, s), 2.50–2.48 (2H, m), 2.36 (2H, q,  $J = 7.4$  Hz);  $^{13}\text{C}\{^1\text{H}\}$  NMR (150 MHz,  $\text{DMSO}-d_6$ )  $\delta$  (ppm): 171.1, 165.8, 143.5, 141.9, 141.6, 139.4, 130.2, 129.4, 128.3, 128.2, 128.0, 127.1, 127.0, 126.8, 123.7, 118.3, 51.8, 36.5, 25.5; LRMS (EI)  $m/z$ : 385 ( $\text{M}^+$ ); HRMS (EI-TOF) Calcd. for  $\text{C}_{25}\text{H}_{23}\text{NO}$ : 385.1678, found: 385.1706; IR (neat): 3324, 2952, 1715, 1676, 1590, 1517, 1406, 1310, 1281, 1109, 856, 767  $\text{cm}^{-1}$ .



### ***N*-(3-Bromophenyl)-5,5-diphenylpent-4-enamide (1r)**

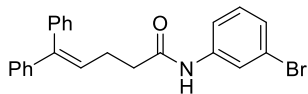

Prepared according to Method B, 1.1 g (53% over 2 steps, 5.0 mmol scale), recrystallized from AcOEt/hexane, colorless plates, mp. 82–83 °C.

$^1\text{H}$  NMR (600 MHz,  $\text{CDCl}_3/\text{TMS}$ )  $\delta$  (ppm): 7.72 (1H, s), 7.39–7.37 (3H, m), 7.32 (1H, tt,  $J = 7.3$ , 1.7 Hz), 7.27–7.14 (9H, m), 7.08 (1H, br.s), 6.10 (1H, t,  $J = 7.3$  Hz), 2.55 (2H, q,  $J = 7.3$  Hz), 2.46 (2H, t,  $J = 7.3$  Hz);  $^{13}\text{C}\{^1\text{H}\}$  NMR (150 MHz,  $\text{CDCl}_3/\text{TMS}$ )  $\delta$  (ppm): 170.5, 143.4, 142.1, 139.6, 139.0, 130.2, 129.7, 128.3, 128.1, 128.0, 127.3, 127.23, 127.19, 126.9, 122.7, 122.5, 118.2, 37.6, 25.6; LRMS (EI)  $m/z$ : 405 ( $\text{M}^+$ ); HRMS (EI-EB) Calcd. for  $\text{C}_{23}\text{H}_{20}^{79}\text{BrNO}$ : 405.0728, found: 405.0754; IR (neat): 3309, 1652, 1583, 1516, 1417, 874, 783  $\text{cm}^{-1}$ .

### ***N*-(Benzo[*d*]thiazol-2-yl)-5,5-diphenylpent-4-enamide (1s)**

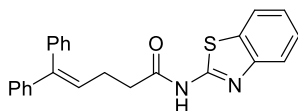

Prepared according to Method B, 784.9 mg (41% over 2 steps, 5.0 mmol scale), recrystallized from DCM/hexane, colorless plates, mp. 173–175 °C.

$^1\text{H}$  NMR (600 MHz,  $\text{CDCl}_3/\text{TMS}$ )  $\delta$  (ppm): 11.2 (1H, br.s), 7.85 (1H, d,  $J = 8.0$  Hz), 7.75 (1H, d,  $J = 8.0$  Hz), 7.44 (1H, t,  $J = 7.5$  Hz), 7.35–7.19 (7H, m), 7.13 (2H, d,  $J = 8.0$  Hz), 7.06 (2H, d,  $J = 7.5$  Hz), 5.98 (1H, t,  $J = 7.0$  Hz), 2.59–2.51 (4H, m);  $^{13}\text{C}\{^1\text{H}\}$  NMR (150 MHz,  $\text{CDCl}_3/\text{TMS}$ )  $\delta$  (ppm): 171.0, 159.8, 147.7, 143.5, 142.1, 139.4, 131.9, 129.6, 128.3, 128.1, 127.21, 127.18, 127.15, 126.4, 126.3, 124.0, 121.7, 120.3, 36.5, 25.2; LRMS (EI)  $m/z$ : 384 ( $\text{M}^+$ ); HRMS (EI-TOF) Calcd. for  $\text{C}_{24}\text{H}_{20}\text{N}_2\text{OS}$ : 384.1296, found: 384.1291; IR (neat): 3189, 3060, 1700, 1598, 1551, 1497, 1443, 1270, 1167, 768, 752  $\text{cm}^{-1}$ .

## **4. General procedure for the synthesis of 5-alkylidene-pyrrolin-2-ones**

In a glove box, an amide **1** (0.20 mmol),  $\text{CuF}_2$  (2.0 mg, 0.020 mmol), 4-*tert*-butylpyridine (29.3  $\mu\text{L}$ , 0.020 mmol), *t*BuOO*t*Bu (147.0  $\mu\text{L}$ , 0.80 mmol), and 1,2-dichloroethane (2.5 mL) were added to a sealed tube. The mixture was stirred at 120 °C for 18 h. The reaction was diluted with water (10 mL) and extracted with chloroform (10 mL  $\times$  3). The organic layers were washed with brine (10 mL) and dried over  $\text{MgSO}_4$ . The solvent was removed under a reduced pressure and the residue was purified by  $\text{SiO}_2$  column chromatography.

**Table S1.** Effect of reaction parameter for the synthesis of **2a**.

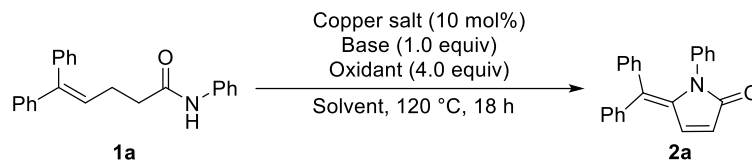

| Entry           | Copper salt          | Base                          | Oxidant                   | Solvent           | 2a (%) <sup>a</sup> |
|-----------------|----------------------|-------------------------------|---------------------------|-------------------|---------------------|
| 1               | CuF <sub>2</sub>     | 4- <i>tert</i> -Butylpyridine | <i>t</i> BuOO <i>t</i> Bu | 1,2-DCE           | 76 (85)             |
| 2               | CuCl                 | 4- <i>tert</i> -Butylpyridine | <i>t</i> BuOO <i>t</i> Bu | 1,2-DCE           | 75                  |
| 3               | CuCl <sub>2</sub>    | 4- <i>tert</i> -Butylpyridine | <i>t</i> BuOO <i>t</i> Bu | 1,2-DCE           | 46                  |
| 4               | Cu(OAc) <sub>2</sub> | 4- <i>tert</i> -Butylpyridine | <i>t</i> BuOO <i>t</i> Bu | 1,2-DCE           | 39                  |
| 5               | CuF <sub>2</sub>     | Pyridine                      | <i>t</i> BuOO <i>t</i> Bu | 1,2-DCE           | 66                  |
| 6               | CuF <sub>2</sub>     | DMAP                          | <i>t</i> BuOO <i>t</i> Bu | 1,2-DCE           | 44                  |
| 7               | CuF <sub>2</sub>     | 1,10-Phen                     | <i>t</i> BuOO <i>t</i> Bu | 1,2-DCE           | 21                  |
| 8               | CuF <sub>2</sub>     | None                          | <i>t</i> BuOO <i>t</i> Bu | 1,2-DCE           | 29                  |
| 9               | CuF <sub>2</sub>     | 4- <i>tert</i> -Butylpyridine | <i>t</i> BuOOH            | 1,2-DCE           | 2                   |
| 10              | CuF <sub>2</sub>     | 4- <i>tert</i> -Butylpyridine | <i>t</i> BuOOAc           | 1,2-DCE           | 0                   |
| 11              | CuF <sub>2</sub>     | 4- <i>tert</i> -Butylpyridine | PIDA                      | 1,2-DCE           | 35                  |
| 12              | CuF <sub>2</sub>     | 4- <i>tert</i> -Butylpyridine | MnO <sub>2</sub>          | 1,2-DCE           | 5                   |
| 13              | CuF <sub>2</sub>     | 4- <i>tert</i> -Butylpyridine | <i>t</i> BuOO <i>t</i> Bu | DCM               | 0                   |
| 14              | CuF <sub>2</sub>     | 4- <i>tert</i> -Butylpyridine | <i>t</i> BuOO <i>t</i> Bu | Toluene           | 44                  |
| 15              | CuF <sub>2</sub>     | 4- <i>tert</i> -Butylpyridine | <i>t</i> BuOO <i>t</i> Bu | PhCF <sub>3</sub> | 0                   |
| 16 <sup>b</sup> | CuF <sub>2</sub>     | 4- <i>tert</i> -Butylpyridine | <i>t</i> BuOO <i>t</i> Bu | 1,2-DCE           | 73                  |

<sup>a</sup> Determined by <sup>1</sup>H-NMR using 1,1,2-trichloroethane as an internal standard. Isolated yield in parentheses. <sup>b</sup> Reaction was conducted at 100 °C.

### 5-(Diphenylmethylene)-1-phenyl-1,5-dihydro-2H-pyrrol-2-one (**2a**)

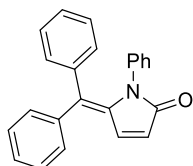

Obtained as yellow needles in 85% (55.0 mg, 0.20 mmol scale), 87% (286.6 mg, 1.0 mmol scale), recrystallized from DCM/hexane, mp. 160–163 °C.

<sup>1</sup>H NMR (400 MHz, CDCl<sub>3</sub>/TMS) δ (ppm): 7.38–7.36 (3H, m), 7.26–7.23 (2H, m), 7.21 (1H, d, *J* = 5.8 Hz), 7.00–6.83 (10H, m), 6.28 (1H, d, *J* = 5.4 Hz); <sup>13</sup>C {<sup>1</sup>H} NMR (100 MHz, CDCl<sub>3</sub>/TMS) δ (ppm): 171.8, 140.5, 140.3, 138.1, 137.9, 135.8, 131.6, 130.94, 130.89, 128.4, 128.0, 127.9, 127.7, 127.2, 127.1, 126.0, 121.7; LRMS (EI) *m/z*: 323 (M<sup>+</sup>); HRMS (EI-TOF) Calcd. for C<sub>23</sub>H<sub>17</sub>NO: 323.1310, found: 323.1286; IR (neat): 3052, 1691, 1683, 1498, 1443, 1370, 1213, 1203, 1163, 1073, 968, 801, 774, 765, 756 cm<sup>-1</sup>.

**5-(Bis(4-methoxyphenyl)methylene)-1-phenyl-1,5-dihydro-2H-pyrrol-2-one (2b)**

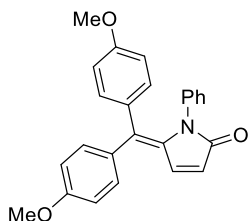

Obtained as red crystals in 80% (61.5 mg), recrystallized from DCM/hexane, mp. 177–178 °C.

$^1\text{H}$  NMR (600 MHz,  $\text{CDCl}_3/\text{TMS}$ )  $\delta$  (ppm): 7.19–7.17 (3H, m), 7.01 (2H, t,  $J = 7.6$  Hz), 6.97–6.94 (3H, m), 6.90 (2H, d,  $J = 8.9$  Hz), 6.77 (2H, d,  $J = 8.9$  Hz), 6.42 (2H, d,  $J = 8.9$  Hz), 6.23 (1H, d,  $J = 5.5$  Hz), 3.85 (3H, s), 3.66 (3H, s);  $^{13}\text{C}\{^1\text{H}\}$  NMR (150 MHz,  $\text{CDCl}_3/\text{TMS}$ )  $\delta$  (ppm): 171.9, 160.1, 159.3, 140.3, 136.8, 136.1, 133.1, 132.5, 131.0, 130.6, 127.8, 127.0, 125.73, 125.72, 120.6, 113.5, 112.7, 55.3, 55.2; LRMS (EI)  $m/z$ : 383 ( $\text{M}^+$ ); HRMS (EI-TOF) Calcd. for  $\text{C}_{25}\text{H}_{21}\text{NO}_3$ : 383.1521, found: 383.1539; IR (neat): 1675, 1604, 1508, 1498, 1252, 1179, 1028, 969, 831  $\text{cm}^{-1}$ .

**5-(Di-*p*-tolylmethylene)-1-phenyl-1,5-dihydro-2H-pyrrol-2-one (2c)**

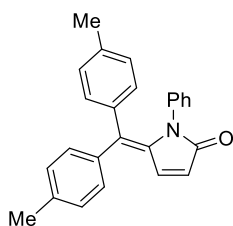

Obtained as colorless needles in 60% (42.4 mg), recrystallized from DCM/hexane, mp. 161–162 °C.

$^1\text{H}$  NMR (600 MHz,  $\text{DMSO}-d_6$ )  $\delta$  (ppm): 7.21 (2H, d,  $J = 8.2$  Hz), 7.18 (1H, d,  $J = 5.9$  Hz), 7.11 (2H, d,  $J = 8.3$  Hz), 6.99 (2H, t,  $J = 7.2$  Hz), 6.94–6.91 (3H, m), 6.70 (2H, d,  $J = 8.2$  Hz), 6.67 (2H, d,  $J = 8.2$  Hz), 6.30 (1H, d,  $J = 5.9$  Hz), 2.34 (3H, s), 2.07 (3H, s);  $^{13}\text{C}\{^1\text{H}\}$  NMR (150 MHz,  $\text{DMSO}-d_6$ )  $\delta$  (ppm): 171.0, 140.6, 138.1, 137.5, 137.3, 137.1, 136.0, 135.1, 131.4, 130.6, 130.3, 128.8, 127.7, 127.6, 127.2, 125.5, 121.0, 20.8, 20.7; LRMS (EI)  $m/z$ : 351 ( $\text{M}^+$ ); HRMS (EI-TOF) Calcd. for  $\text{C}_{25}\text{H}_{21}\text{NO}$ : 351.1623, found: 351.1606; IR (neat): 1688, 1497, 1371, 1300, 1209, 1182, 969, 823, 802  $\text{cm}^{-1}$ .

**5-(Bis(4-fluorophenyl)methylene)-1-phenyl-1,5-dihydro-2H-pyrrol-2-one (2d)**

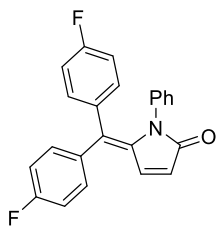

Obtained as yellow crystals in 82% (58.9 mg), recrystallized from DCM/hexane, mp. 153–155 °C.  $^1\text{H}$  NMR (600 MHz,  $\text{CDCl}_3/\text{TMS}$ )  $\delta$  (ppm): 7.21 (2H, dd,  $J = 8.6, 5.2$  Hz), 7.17 (1H, d,  $J = 5.5$  Hz), 7.08 (2H, t,  $J = 8.6$  Hz), 7.03 (2H, t,  $J = 7.6$  Hz), 6.98 (1H, t,  $J = 7.6$  Hz), 6.95–6.93 (2H, m), 6.80 (2H, dd,  $J = 8.9, 5.5$  Hz), 6.59 (2H, t,  $J = 8.9$  Hz), 6.29 (1H, d,  $J = 5.5$  Hz);  $^{13}\text{C}\{^1\text{H}\}$  NMR (150 MHz,  $\text{CDCl}_3/\text{TMS}$ )  $\delta$  (ppm): 171.6, 163.0 (d,  $J_{\text{C-F}} = 249.3$  Hz), 162.1 (d,  $J_{\text{C-F}} = 249.3$  Hz), 139.8, 138.2, 136.4 (d,  $J_{\text{C-F}} = 2.9$  Hz), 135.7, 133.9 (d,  $J_{\text{C-F}} = 2.9$  Hz), 133.2 (d,  $J_{\text{C-F}} = 8.6$  Hz), 132.6 (d,  $J_{\text{C-F}} = 8.6$  Hz), 128.2, 128.1, 127.1, 126.3, 122.1, 115.3 (d,  $J_{\text{C-F}} = 21.5$  Hz), 114.4 (d,  $J_{\text{C-F}} = 22.9$  Hz);  $^{19}\text{F}$  NMR (565 MHz,  $\text{CDCl}_3$ )  $\delta$  (ppm): –111.7, –111.9; LRMS (EI)  $m/z$ : 359 ( $\text{M}^+$ ); HRMS (EI-TOF) Calcd. for  $\text{C}_{23}\text{H}_{15}\text{F}_2\text{NO}$ : 359.1122, found: 359.1110; IR (neat): 3039, 1688, 1594, 1505, 1497, 1366, 1305, 1231, 1156, 1101, 969, 844  $\text{cm}^{-1}$ .

**5-(Bis(4-chlorophenyl)methylene)-1-phenyl-1,5-dihydro-2H-pyrrol-2-one (2e)**

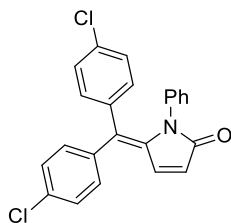

Obtained as yellow crystals in 70% (54.6 mg), recrystallized from DCM/hexane, mp. 206–208 °C.  $^1\text{H}$  NMR (600 MHz,  $\text{CDCl}_3/\text{TMS}$ )  $\delta$  (ppm): 7.36 (2H, d,  $J = 8.2$  Hz), 7.18–7.16 (3H, m), 7.05–6.99 (3H, m), 6.93–6.92 (2H, m), 6.86 (2H, d,  $J = 8.3$  Hz), 6.74 (2H, d,  $J = 8.9$  Hz), 6.31 (1H, d,  $J = 5.5$  Hz);  $^{13}\text{C}\{^1\text{H}\}$  NMR (150 MHz,  $\text{CDCl}_3/\text{TMS}$ )  $\delta$  (ppm): 171.5, 139.6, 138.7, 138.5, 136.0, 135.5, 134.9, 133.9, 132.7, 132.0, 128.5, 128.2, 127.6, 127.5, 127.1, 126.3, 122.4; LRMS (EI)  $m/z$ : 391 ( $\text{M}^+$ ); HRMS (EI-TOF) Calcd. for  $\text{C}_{23}\text{H}_{15}^{35}\text{Cl}_2\text{NO}$ : 391.0531, found: 391.0503; IR (neat): 3063, 1689, 1595, 1498, 1489, 1216, 1087, 1011, 806  $\text{cm}^{-1}$ .

**5-(Bis(4-(trifluoromethyl)phenyl)methylene)-1-phenyl-1,5-dihydro-2H-pyrrol-2-one (2f)**

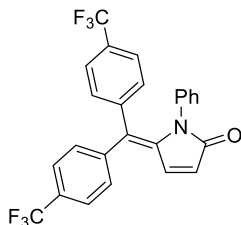

Obtained as yellow crystals in 63% (58.3 mg), recrystallized from DCM/hexane, mp. 168–170 °C.  $^1\text{H}$  NMR (600 MHz,  $\text{CDCl}_3/\text{TMS}$ )  $\delta$  (ppm): 7.66 (2H, d,  $J = 8.2$  Hz), 7.37 (2H, d,  $J = 8.2$  Hz), 7.21 (1H, d,  $J = 6.2$  Hz), 7.14 (2H, d,  $J = 8.2$  Hz), 7.02–6.95 (3H, m), 6.93–6.90 (4H, m), 6.37 (1H, d,  $J = 5.5$  Hz);  $^{13}\text{C}\{^1\text{H}, ^{19}\text{F}\}$  NMR (150 MHz,  $\text{CDCl}_3/\text{TMS}$ )  $\delta$  (ppm): 171.3, 143.4, 140.9, 140.0, 139.4, 135.3, 131.8, 130.9, 130.7, 129.8, 128.3, 127.3, 126.7, 126.4, 125.4, 124.3, 123.9,

123.6, 123.4;  $^{19}\text{F}$  NMR (565 MHz,  $\text{CDCl}_3$ )  $\delta$  (ppm):  $-62.1$ ,  $-62.5$ ; LRMS (EI)  $m/z$ : 459 ( $\text{M}^+$ ); HRMS (EI-TOF) Calcd. for  $\text{C}_{25}\text{H}_{15}\text{F}_6\text{NO}$ : 459.1058, found: 459.1048; IR (neat): 1696, 1612, 1322, 1155, 1121, 1065,  $810\text{ cm}^{-1}$ .

**1-Phenyl-5-(9*H*-xanthen-9-ylidene)-1,5-dihydro-2*H*-pyrrol-2-one (2g)**

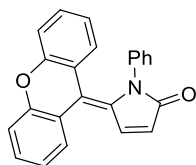

Obtained as yellow crystals in 25% (16.4 mg), recrystallized from DCM/hexane, mp.  $180\text{--}183\text{ }^\circ\text{C}$ .  $^1\text{H}$  NMR (600 MHz,  $\text{CDCl}_3/\text{TMS}$ )  $\delta$  (ppm): 8.02 (1H, d,  $J = 6.0\text{ Hz}$ ), 7.62 (1H, dd,  $J = 7.5, 1.5\text{ Hz}$ ), 7.40–7.37 (1H, m), 7.30–7.25 (2H, m), 7.07–7.02 (4H, m), 6.99 (1H, td,  $J = 7.7, 1.5\text{ Hz}$ ), 6.92 (2H, dd,  $J = 8.0, 1.5\text{ Hz}$ ), 6.70 (1H, dd,  $J = 7.5, 1.5\text{ Hz}$ ), 6.40 (1H, d,  $J = 6.0\text{ Hz}$ ), 6.38–6.35 (1H, m);  $^{13}\text{C}\{^1\text{H}\}$  NMR (150 MHz,  $\text{CDCl}_3/\text{TMS}$ )  $\delta$  (ppm): 171.7, 154.2, 153.2, 138.8, 136.5, 134.4, 128.9, 128.7, 128.6, 128.1, 127.5, 126.6, 126.3, 124.2, 123.8, 122.5, 122.0, 121.6, 116.9, 116.3, 115.2; LRMS (EI)  $m/z$ : 337 ( $\text{M}^+$ ); HRMS (EI-TOF) Calcd. for  $\text{C}_{23}\text{H}_{15}\text{NO}_2$ : 337.1103, found: 337.1096; IR (neat): 1684, 1593, 1495, 1447, 1199, 966,  $872\text{ cm}^{-1}$ .

**5-(5*H*-Dibenzo[*a,d*][7]annulen-5-ylidene)-1-phenyl-1,5-dihydro-2*H*-pyrrol-2-one (2h)**

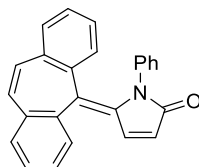

Obtained as yellow crystals in 78% (54.0 mg), recrystallized from DCM/hexane, mp.  $235\text{--}236\text{ }^\circ\text{C}$ .  $^1\text{H}$  NMR (600 MHz,  $\text{CDCl}_3/\text{TMS}$ )  $\delta$  (ppm): 7.40–7.38 (1H, m), 7.35–7.32 (3H, m), 7.28–7.18 (3H, m), 7.08 (1H, d,  $J = 8.3\text{ Hz}$ ), 6.99–6.89 (4H, m), 6.70–6.65 (3H, m), 6.29–6.24 (2H, m);  $^{13}\text{C}\{^1\text{H}\}$  NMR (150 MHz,  $\text{CDCl}_3/\text{TMS}$ )  $\delta$  (ppm): 171.3, 138.4, 136.8, 136.3, 135.7, 135.3, 134.8, 133.5, 131.2, 130.9, 129.3, 128.5, 128.1, 128.0, 127.8, 127.54, 127.49, 127.4, 127.3, 126.9, 126.6, 126.3, 122.6; LRMS (EI)  $m/z$ : 347 ( $\text{M}^+$ ); HRMS (EI-TOF) Calcd. for  $\text{C}_{25}\text{H}_{17}\text{NO}$ : 347.1310, found: 347.1286; IR (neat): 1690, 1496, 1371, 1210, 1167,  $786\text{ cm}^{-1}$ .

**5-(Diphenylmethylene)-1-(4-methoxyphenyl)-1,5-dihydro-2*H*-pyrrol-2-one (2i)**

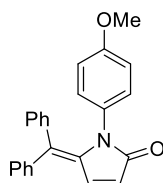

Obtained as yellow crystals in 77% (54.1 mg), recrystallized from DCM/hexane, mp. 133–134 °C.  $^1\text{H}$  NMR (600 MHz,  $\text{CDCl}_3/\text{TMS}$ )  $\delta$  (ppm): 7.37–7.35 (3H, m), 7.23 (2H, dd,  $J = 7.9, 1.7$  Hz), 7.18 (1H, d,  $J = 6.2$  Hz), 6.99–6.96 (1H, m), 6.91 (2H, t,  $J = 7.6$  Hz), 6.86–6.82 (4H, m), 6.53–6.51 (2H, m), 6.27 (1H, d,  $J = 6.2$  Hz), 3.66 (3H, s);  $^{13}\text{C}\{^1\text{H}\}$  NMR (150 MHz,  $\text{CDCl}_3/\text{TMS}$ )  $\delta$  (ppm): 172.0, 157.6, 140.6, 139.9, 138.3, 137.9, 131.6, 130.9, 130.6, 128.8, 128.33, 128.28, 128.0, 127.6, 127.2, 121.7, 113.4, 55.3; LRMS (EI)  $m/z$ : 353 ( $\text{M}^+$ ); HRMS (EI-TOF) Calcd. for  $\text{C}_{24}\text{H}_{19}\text{NO}_2$ : 353.1416, found: 353.1410; IR (neat): 3052, 1690, 1613, 1512, 1443, 1248, 1159, 1026, 830, 806  $\text{cm}^{-1}$ .

**5-(Diphenylmethylene)-1-(*p*-tolyl)-1,5-dihydro-2*H*-pyrrol-2-one (2j)**

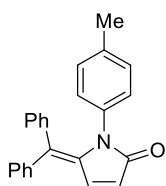

Obtained as yellow crystals in 81% (54.4 mg), recrystallized from DCM/hexane, mp. 103–105 °C.  $^1\text{H}$  NMR (600 MHz,  $\text{CDCl}_3/\text{TMS}$ )  $\delta$  (ppm): 7.37–7.35 (3H, m), 7.24 (2H, dd,  $J = 7.9, 1.7$  Hz), 7.18 (1H, d,  $J = 6.2$  Hz), 6.95 (1H, t,  $J = 7.5$  Hz), 6.88 (2H, t,  $J = 7.5$  Hz), 6.83–6.81 (4H, m), 6.77 (2H, d,  $J = 8.2$  Hz), 6.26 (1H, d,  $J = 6.2$  Hz), 2.14 (3H, s);  $^{13}\text{C}\{^1\text{H}\}$  NMR (150 MHz,  $\text{CDCl}_3/\text{TMS}$ )  $\delta$  (ppm): 171.9, 140.7, 140.0, 138.3, 138.0, 135.7, 133.2, 131.6, 130.9, 130.7, 128.5, 128.4, 128.0, 127.4, 127.1, 127.0, 121.8, 20.8; LRMS (EI)  $m/z$ : 337 ( $\text{M}^+$ ); HRMS (EI-TOF) Calcd. for  $\text{C}_{24}\text{H}_{19}\text{NO}$ : 337.1467, found: 337.1441; IR (neat): 3030, 1690, 1593, 1515, 1489, 1446, 1374, 1218, 1162, 971, 824  $\text{cm}^{-1}$ .

**5-(Diphenylmethylene)-1-(4-isopropylphenyl)-1,5-dihydro-2*H*-pyrrol-2-one (2k)**

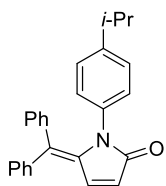

Obtained as orange crystals in 81% (58.9 mg), recrystallized from DCM/hexane, mp. 121–124 °C.  $^1\text{H}$  NMR (600 MHz,  $\text{CDCl}_3/\text{TMS}$ )  $\delta$  (ppm): 7.37–7.34 (3H, m), 7.25–7.23 (2H, m), 7.19 (1H, d,  $J = 5.5$  Hz), 6.91 (1H, t,  $J = 7.2$  Hz), 6.86–6.78 (8H, m), 6.27 (1H, d,  $J = 6.2$  Hz), 2.69 (1H, sep,  $J = 6.9$  Hz), 1.09 (6H, d,  $J = 6.9$  Hz);  $^{13}\text{C}\{^1\text{H}\}$  NMR (150 MHz,  $\text{CDCl}_3/\text{TMS}$ )  $\delta$  (ppm): 171.8, 146.7, 140.7, 139.9, 138.2, 137.9, 133.3, 131.6, 130.8, 130.7, 128.3, 128.0, 127.5, 127.1, 127.0, 125.9, 121.7, 33.6, 23.8; LRMS (EI)  $m/z$ : 365 ( $\text{M}^+$ ); HRMS (EI-TOF) Calcd. for  $\text{C}_{26}\text{H}_{23}\text{NO}$ : 365.1780, found: 365.1752; IR (neat): 2958, 2863, 1692, 1371, 1155, 805  $\text{cm}^{-1}$ .

**5-(Diphenylmethylene)-1-(4-fluorophenyl)-1,5-dihydro-2H-pyrrol-2-one (2l)**

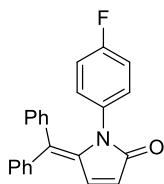

Obtained as yellow crystals in 78% (53.3 mg), recrystallized from DCM/hexane, mp. 153–155 °C.  $^1\text{H}$  NMR (600 MHz,  $\text{CDCl}_3/\text{TMS}$ )  $\delta$  (ppm): 7.39–7.36 (3H, m), 7.25–7.21 (3H, m), 7.01 (1H, t,  $J = 7.2$  Hz), 6.94–6.90 (4H, m), 6.83 (2H, d,  $J = 6.9$  Hz), 6.68 (2H, t,  $J = 8.6$  Hz), 6.27 (1H, d,  $J = 6.2$  Hz);  $^{13}\text{C}\{^1\text{H}, ^{19}\text{F}\}$  NMR (150 MHz,  $\text{CDCl}_3/\text{TMS}$ )  $\delta$  (ppm): 171.9, 160.6, 140.4, 140.3, 138.1, 137.9, 131.9, 131.7, 131.03, 130.95, 128.8, 128.6, 128.2, 128.0, 127.4, 121.7, 114.8;  $^{19}\text{F}$  NMR (565 MHz,  $\text{CDCl}_3$ )  $\delta$  (ppm): –115.4; LRMS (EI)  $m/z$ : 341 ( $\text{M}^+$ ); HRMS (EI-TOF) Calcd. for  $\text{C}_{23}\text{H}_{16}\text{FNO}$ : 341.1216, found: 341.1239; IR (neat): 1693, 1600, 1506, 1490, 1382, 1216, 974, 838, 808, 738  $\text{cm}^{-1}$ .

**1-(4-Chlorophenyl)-5-(diphenylmethylene)-1,5-dihydro-2H-pyrrol-2-one (2m)**

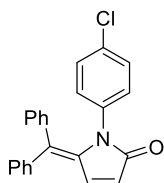

Obtained as yellow crystals in 88% (63.2 mg), recrystallized from DCM/hexane, mp. 128–130 °C.  $^1\text{H}$  NMR (600 MHz,  $\text{CDCl}_3/\text{TMS}$ )  $\delta$  (ppm): 7.39–7.36 (3H, m), 7.25–7.22 (3H, m), 7.03 (1H, t,  $J = 7.2$  Hz), 6.95–6.92 (4H, m), 6.89–6.87 (2H, m), 6.83 (2H, d,  $J = 6.9$  Hz), 6.27 (1H, d,  $J = 6.2$  Hz);  $^{13}\text{C}\{^1\text{H}\}$  NMR (150 MHz,  $\text{CDCl}_3/\text{TMS}$ )  $\delta$  (ppm): 171.5, 140.4, 140.2, 137.8, 137.7, 134.5, 131.62, 131.57, 131.2, 130.9, 128.6, 128.2, 128.1, 127.99, 127.97, 127.4, 121.6; LRMS (EI)  $m/z$ : 357 ( $\text{M}^+$ ); HRMS (EI-TOF) Calcd. for  $\text{C}_{23}\text{H}_{16}^{35}\text{ClNO}$ : 357.0920, found: 357.0910; IR (neat): 1688, 1593, 1554, 1493, 1446, 1374, 1203, 1089, 971, 833, 798  $\text{cm}^{-1}$ .

**1-(4-Bromophenyl)-5-(diphenylmethylene)-1,5-dihydro-2H-pyrrol-2-one (2n)**

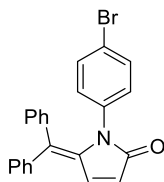

Obtained as yellow crystals in 89% (71.4 mg), recrystallized from DCM/hexane, mp. 149–151 °C.  $^1\text{H}$  NMR (600 MHz,  $\text{CDCl}_3/\text{TMS}$ )  $\delta$  (ppm): 7.39–7.36 (3H, m), 7.25–7.22 (3H, m), 7.10 (2H, d,  $J = 8.2$  Hz), 7.04 (1H, t,  $J = 7.6$  Hz), 6.94 (2H, t,  $J = 7.9$  Hz), 6.83–6.81 (4H, m), 6.27 (1H, d,  $J = 5.5$  Hz);  $^{13}\text{C}\{^1\text{H}\}$  NMR (150 MHz,  $\text{CDCl}_3/\text{TMS}$ )  $\delta$  (ppm): 171.5, 140.5, 140.2, 137.8, 137.6,

135.0, 131.6, 131.2, 130.93, 130.89, 128.61, 128.58, 128.1, 128.0, 127.4, 121.7, 119.5; LRMS (EI)  $m/z$ : 401 ( $M^+$ ); HRMS (EI-TOF) Calcd. for  $C_{23}H_{16}^{79}BrNO$ : 401.0415, found: 401.0427; IR (neat): 3068, 1684, 1489, 1162, 1068, 1015, 831, 798  $cm^{-1}$ .

**5-(Diphenylmethylene)-1-(4-(trifluoromethyl)phenyl)-1,5-dihydro-2H-pyrrol-2-one (2o)**

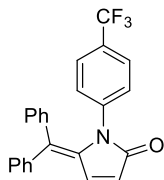

Obtained as colorless needles in 46% (35.8 mg), recrystallized from DCM/hexane, mp. 136–137 °C.

$^1H$  NMR (600 MHz,  $CDCl_3$ /TMS)  $\delta$  (ppm): 7.41–7.37 (3H, m), 7.27–7.26 (3H, m), 7.23 (2H, d,  $J$  = 8.9 Hz), 7.06 (2H, d,  $J$  = 8.2 Hz), 6.97 (1H, t,  $J$  = 7.2 Hz), 6.90 (2H, t,  $J$  = 7.6 Hz), 6.82 (2H, d,  $J$  = 7.6 Hz), 6.30 (1H, d,  $J$  = 5.5 Hz);  $^{13}C\{^1H, ^{19}F\}$  NMR (150 MHz,  $CDCl_3$ /TMS)  $\delta$  (ppm): 171.3, 140.8, 140.1, 139.1, 137.8, 137.5, 131.7, 131.5, 130.8, 128.8, 128.24, 128.19, 127.9, 127.5, 127.2, 124.9, 123.8, 121.7;  $^{19}F$  NMR (565 MHz,  $CDCl_3$ )  $\delta$  (ppm): –62.1; LRMS (EI)  $m/z$ : 391 ( $M^+$ ); HRMS (EI-TOF) Calcd. for  $C_{24}H_{16}F_3NO$  ( $M^+$ ): 391.1184, found: 391.1174; IR (neat): 1691, 1379, 1322, 1112, 1063, 975, 853, 800  $cm^{-1}$ .

**4-(2-(Diphenylmethylene)-5-oxo-2,5-dihydro-1H-pyrrol-1-yl)benzonitrile (2p)**

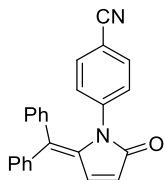

Obtained as yellow crystals in 73% (51.0 mg), recrystallized from DCM/hexane, mp. 178–179 °C.

$^1H$  NMR (600 MHz,  $CDCl_3$ /TMS)  $\delta$  (ppm): 7.43–7.38 (3H, m), 7.29–7.25 (5H, m), 7.09–7.08 (2H, m), 7.03 (1H, t,  $J$  = 7.2 Hz), 6.94 (2H, t,  $J$  = 7.9 Hz), 6.86–6.84 (2H, m), 6.29 (1H, d,  $J$  = 6.2 Hz);  $^{13}C\{^1H\}$  NMR (150 MHz,  $CDCl_3$ /TMS)  $\delta$  (ppm): 171.0, 141.2, 140.0, 139.8, 137.8, 137.0, 131.8, 131.7, 131.6, 130.9, 128.9, 128.5, 128.3, 127.6, 127.2, 121.5, 118.5, 109.0; LRMS (EI)  $m/z$ : 348 ( $M^+$ ); HRMS (EI-TOF) Calcd. for  $C_{24}H_{16}N_2O$ : 348.1263, found: 348.1263; IR (neat): 2226, 1690, 1600, 1506, 1367, 1207, 1159, 970, 845, 799  $cm^{-1}$ .



**Methyl 4-(2-(diphenylmethylene)-5-oxo-2,5-dihydro-1H-pyrrol-1-yl)benzoate (2q)**

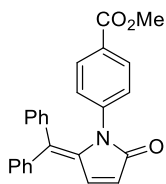

Obtained as colorless needles in 78% (58.9 mg), recrystallized from DCM/hexane, mp. 193–195 °C.

$^1\text{H}$  NMR (600 MHz,  $\text{CDCl}_3/\text{TMS}$ )  $\delta$  (ppm): 7.67 (2H, d,  $J = 8.2$  Hz), 7.41–7.38 (3H, m), 7.27–7.25 (3H, m), 7.04 (2H, d,  $J = 8.2$  Hz), 6.94 (1H, t,  $J = 7.2$  Hz), 6.90 (2H, t,  $J = 7.6$  Hz), 6.85 (2H, d,  $J = 6.8$  Hz), 6.28 (1H, d,  $J = 6.2$  Hz), 3.84 (3H, s);  $^{13}\text{C}\{^1\text{H}\}$  NMR (150 MHz,  $\text{CDCl}_3/\text{TMS}$ )  $\delta$  (ppm): 171.4, 166.4, 140.8, 140.2, 140.1, 137.9, 137.5, 131.65, 131.58, 131.57, 130.9, 129.3, 128.7, 128.2, 127.5, 127.1, 126.5, 121.6, 52.0; LRMS (EI)  $m/z$ : 381 ( $\text{M}^+$ ); HRMS (EI-TOF) Calcd. for  $\text{C}_{25}\text{H}_{19}\text{NO}_3$ : 381.1365, found: 381.1341; IR (neat): 3062, 1722, 1696, 1601, 1507, 1437, 1361, 1275, 1167, 1102, 1072, 969, 863, 802  $\text{cm}^{-1}$ .

**1-(3-Bromophenyl)-5-(diphenylmethylene)-1,5-dihydro-2H-pyrrol-2-one (2r)**

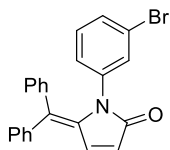

Obtained as yellow needles in 85% (68.2 mg), recrystallized from DCM/hexane, mp. 143–145 °C.

$^1\text{H}$  NMR (600 MHz,  $\text{CDCl}_3/\text{TMS}$ )  $\delta$  (ppm): 7.39–7.36 (3H, m), 7.25–7.23 (3H, m), 7.04 (1H, d,  $J = 8.2$  Hz), 7.01–6.96 (5H, m), 6.89 (1H, t,  $J = 7.9$  Hz), 6.86 (2H, d,  $J = 6.8$  Hz), 6.27 (1H, d,  $J = 5.5$  Hz);  $^{13}\text{C}\{^1\text{H}\}$  NMR (150 MHz,  $\text{CDCl}_3/\text{TMS}$ )  $\delta$  (ppm): 171.4, 140.5, 140.2, 137.8, 137.5, 136.9, 131.6, 131.3, 130.6, 130.2, 129.1, 128.9, 128.6, 128.14, 128.10, 127.4, 125.8, 121.6, 121.3; LRMS (EI)  $m/z$ : 401 ( $\text{M}^+$ ); HRMS (EI-TOF) Calcd. for  $\text{C}_{23}\text{H}_{16}^{79}\text{BrNO}$  ( $\text{M}^+$ ): 401.0415, found: 401.0438; IR (neat): 1690, 1587, 1476, 1364, 1201, 1152, 980, 802  $\text{cm}^{-1}$ .

**5. General procedure for the synthesis of 5-alkylidene-pyrrolidin-2-ones**

In a glove box, an amide **1** (0.20 mmol), CuBr (2.8 mg, 0.020 mmol),  $\text{AgBF}_4$  (3.8 mg, 0.020 mmol), *tert*-butylpyridine (7.4  $\mu\text{L}$ , 0.050 mmol),  $\text{MnO}_2$  (52.2 mg, 0.60 mmol), and 1,2-dichloroethane (1.5 mL) were added to a sealed tube. The mixture was stirred at 120 °C for 24 h. After the reaction, the mixture was filtered through Celite and a  $\text{SiO}_2$  pad with AcOEt and then the solvent was removed under a reduced pressure. The residue was purified by  $\text{SiO}_2$  column chromatography.

**Table S2.** Copper optimization for the synthesis of **3a**.

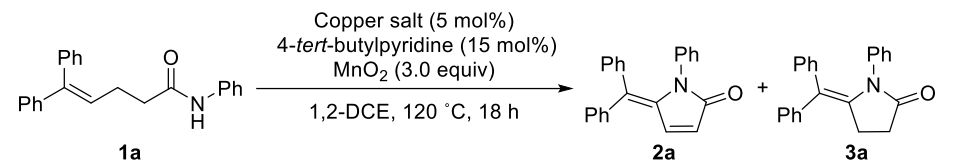

| Entry            | Copper salt                                          | 2a (%) <sup>a</sup> | 3a (%) <sup>a</sup> |
|------------------|------------------------------------------------------|---------------------|---------------------|
| 1 <sup>b,c</sup> | CuF <sub>2</sub>                                     | 5                   | 89                  |
| 2 <sup>b</sup>   | CuF <sub>2</sub>                                     | 2                   | 84                  |
| 3                | CuF <sub>2</sub>                                     | 0                   | 30                  |
| 4                | Cu(acac) <sub>2</sub>                                | 0                   | 28                  |
| 5                | Cu(BF <sub>4</sub> ) <sub>2</sub> ·6H <sub>2</sub> O | 0                   | 49                  |
| 6                | Cu(OAc) <sub>2</sub>                                 | 0                   | 35                  |
| 7                | CuOAc                                                | 0                   | 31                  |
| 8                | CuCl                                                 | 0                   | 23                  |
| 9                | [(MeCN) <sub>4</sub> Cu]BF <sub>4</sub>              | 0                   | 28                  |
| 10               | [(MeCN) <sub>4</sub> Cu]PF <sub>6</sub>              | 0                   | 36                  |

<sup>a</sup> Determined by <sup>1</sup>H-NMR using 1,1,2-trichloroethane as an internal standard. <sup>b</sup> 10 mol% of CuF<sub>2</sub> and 1.0 equiv of 4-*tert*-butylpyridine were used. <sup>c</sup> 4.0 equiv of MnO<sub>2</sub> was used.

**Table S3.** Optimization of copper and silver salts for the synthesis of **3a**.

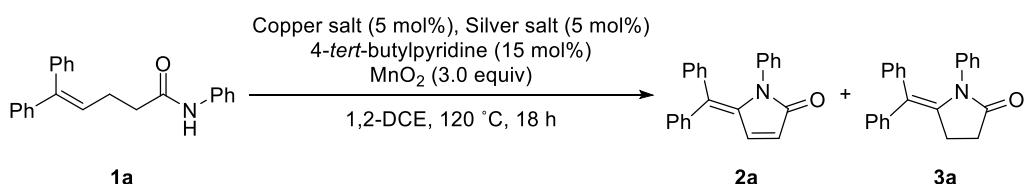

| Entry          | Copper salt                                          | Silver salt        | 2a (%) <sup>a</sup> | 3a (%) <sup>a</sup> |
|----------------|------------------------------------------------------|--------------------|---------------------|---------------------|
| 1              | Cu(BF <sub>4</sub> ) <sub>2</sub> ·6H <sub>2</sub> O | None               | 0                   | 49                  |
| 2              | CuBr                                                 | AgBF <sub>4</sub>  | 2                   | 69                  |
| 3              | CuBr                                                 | AgSbF <sub>6</sub> | 1                   | 56                  |
| 4              | CuBr                                                 | AgNTf <sub>2</sub> | 3                   | 30                  |
| 5              | None                                                 | AgBF <sub>4</sub>  | 0                   | 1                   |
| 6 <sup>b</sup> | CuBr                                                 | AgBF <sub>4</sub>  | 3                   | 55                  |

<sup>a</sup> Determined by <sup>1</sup>H-NMR using 1,1,2-trichloroethane as an internal standard.

<sup>b</sup> 10 mol% of copper and silver salts were used.

**Table S4.** Detailed reaction conditions for the synthesis of **3a**.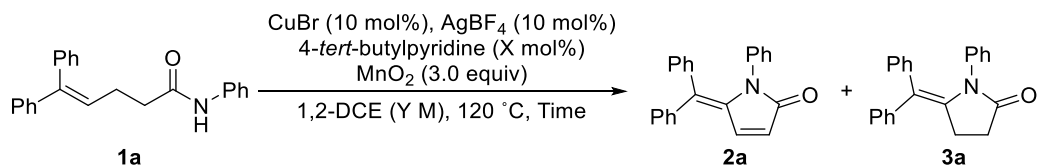

| Entry    | Time (h)  | X (mol%)  | Y (M)       | 2a (%) <sup>a</sup> | 3a (%) <sup>a</sup> |
|----------|-----------|-----------|-------------|---------------------|---------------------|
| 1        | 18        | 15        | 0.080       | 3                   | 55                  |
| 2        | 24        | 15        | 0.080       | 3                   | 67                  |
| 3        | 24        | 25        | 0.080       | 3                   | 74                  |
| 4        | 24        | 35        | 0.080       | 1                   | 50                  |
| 6        | 24        | 25        | 0.067       | 1                   | 42                  |
| 7        | 24        | 25        | 0.10        | 3                   | 69                  |
| <b>8</b> | <b>24</b> | <b>25</b> | <b>0.13</b> | <b>5</b>            | <b>94 (91)</b>      |

<sup>a</sup> Determined by <sup>1</sup>H-NMR using 1,1,2-trichloroethane as an internal standard. Isolated yield in parentheses.

**Scheme S1.** Unsuccessful substrates under condition B.

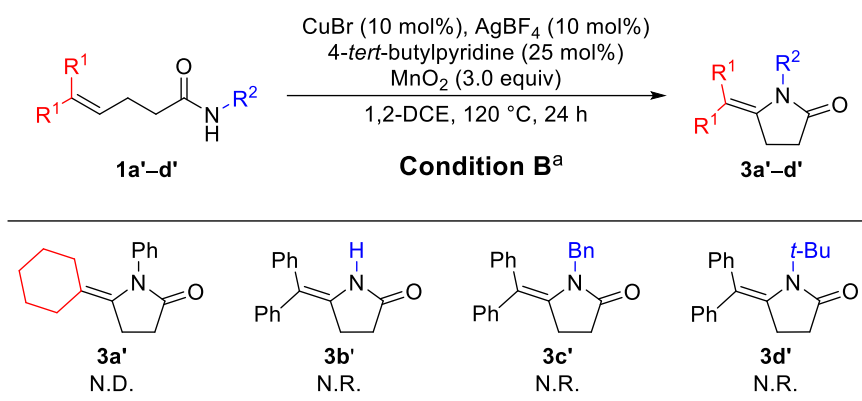

Yields were determined by <sup>1</sup>H-NMR using 1,1,2-trichloroethane as an internal standard.

<sup>a</sup> Reaction conditions: **1** (0.20 mmol), CuBr (0.020 mmol), AgBF<sub>4</sub> (0.020 mmol), 4-*tert*-butylpyridine (0.050 mmol), and MnO<sub>2</sub> (0.60 mmol) in 1,2-DCE (1.5 mL) at 120 °C for 24 h.

### 5-(Diphenylmethylene)-1-phenylpyrrolidin-2-one (**3a**)

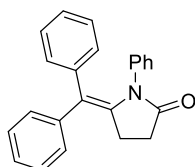

Obtained as colorless plates in 91% (59.0 mg), recrystallized from DCM/hexane, mp. 146–148 °C.

<sup>1</sup>H NMR (600 MHz, CDCl<sub>3</sub>/TMS) δ (ppm): 7.31–7.29 (2H, m), 7.25–7.22 (1H, m), 7.19–7.18 (2H, m), 7.00–6.96 (4H, m), 6.90–6.88 (1H, m), 6.83–6.81 (3H, m), 6.72–6.71 (2H, m), 2.99–2.97 (2H, m), 2.71–2.68 (2H, m); <sup>13</sup>C{<sup>1</sup>H} NMR (150 MHz, CDCl<sub>3</sub>/TMS) δ (ppm): 176.3, 142.1, 139.2, 137.9, 136.1, 130.1, 130.0, 128.2, 127.9, 127.1, 126.7, 126.2, 126.0, 125.9, 120.2, 30.9, 28.3; LRMS (EI) *m/z*: 325 (M<sup>+</sup>); HRMS (EI-TOF) Calcd. for C<sub>23</sub>H<sub>19</sub>NO: 325.1467, found: 325.1456; IR (neat): 3046, 1723, 1620, 1595, 1495, 1359, 1160, 1027, 773, 751 cm<sup>-1</sup>.

**5-(Bis(4-methoxyphenyl)methylene)-1-phenylpyrrolidin-2-one (3b)**

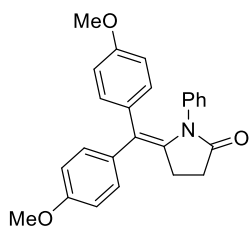

Obtained as yellow crystals in 61% (46.8 mg), recrystallized from DCM/hexane, mp. 164–166 °C.  $^1\text{H}$  NMR (600 MHz,  $\text{CDCl}_3/\text{TMS}$ )  $\delta$  (ppm): 7.09 (2H, d,  $J = 8.9$  Hz), 6.99–6.98 (4H, m), 6.91–6.90 (1H, m), 6.84 (2H, d,  $J = 8.9$  Hz), 6.61 (2H, d,  $J = 8.9$  Hz), 6.36 (2H, d,  $J = 8.9$  Hz), 3.80 (3H, s), 3.62 (3H, s), 2.96 (2H, t,  $J = 7.7$  Hz), 2.68 (2H, t,  $J = 7.7$  Hz);  $^{13}\text{C}\{^1\text{H}\}$  NMR (150 MHz,  $\text{CDCl}_3/\text{TMS}$ )  $\delta$  (ppm): 176.3, 158.3, 157.7, 136.7, 136.1, 134.6, 132.0, 131.1, 131.0, 127.9, 126.1, 125.9, 119.5, 113.5, 112.6, 55.2, 55.1, 31.1, 28.4; LRMS (EI)  $m/z$ : 385 ( $\text{M}^+$ ); HRMS (EI-TOF) Calcd. for  $\text{C}_{25}\text{H}_{23}\text{NO}_3$ : 385.1678, found: 385.1706; IR (neat): 2969, 2835, 1713, 1606, 1508, 1358, 1179, 1027, 829, 761  $\text{cm}^{-1}$ .

**5-(Di-*p*-tolylmethylene)-1-phenylpyrrolidin-2-one (3c)**

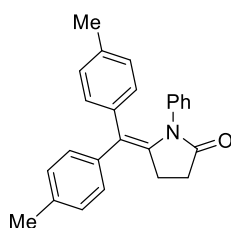

Obtained as colorless needles in 99% (69.4 mg, **3c** : **2c** = 93 : 7), recrystallized from DCM/hexane, mp. 208–211 °C.  $^1\text{H}$  NMR (600 MHz,  $\text{CDCl}_3/\text{TMS}$ )  $\delta$  (ppm): 7.10 (2H, d,  $J = 8.2$  Hz), 7.06 (2H, d,  $J = 8.2$  Hz), 6.98–6.95 (4H, m), 6.90–6.87 (1H, m), 6.61 (2H, d,  $J = 8.2$  Hz), 6.58 (2H, d,  $J = 8.2$  Hz), 2.97 (2H, t,  $J = 7.6$  Hz), 2.68 (2H, t,  $J = 7.6$  Hz), 2.34 (3H, s), 2.09 (3H, s);  $^{13}\text{C}\{^1\text{H}\}$  NMR (150 MHz,  $\text{CDCl}_3/\text{TMS}$ )  $\delta$  (ppm): 176.3, 139.3, 137.3, 136.4, 136.3, 136.2, 135.5, 129.9, 129.8, 128.8, 127.85, 127.76, 126.2, 125.7, 120.2, 31.1, 28.4, 21.1, 20.9; LRMS (EI)  $m/z$ : 353 ( $\text{M}^+$ ); HRMS (EI-TOF) Calcd. for  $\text{C}_{25}\text{H}_{23}\text{NO}$ : 353.1780, found: 353.1775; IR (neat): 3019, 2927, 1732, 1636, 1496, 1369, 1228, 1154, 815  $\text{cm}^{-1}$ .

**5-(Bis(4-fluorophenyl)methylene)-1-phenylpyrrolidin-2-one (3d)**

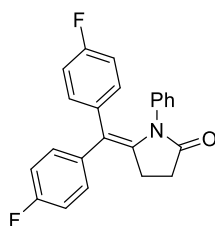

Obtained as colorless crystals in 80% (58.2 mg, **3d** : **2d** = 95 : 5), recrystallized from DCM/hexane, mp. 179–181 °C.

<sup>1</sup>H NMR (600 MHz, CDCl<sub>3</sub>/TMS) δ (ppm): 7.14–7.12 (2H, m), 7.03–6.94 (7H, m), 6.67–6.64 (2H, m), 6.52 (2H, t, *J* = 8.6 Hz), 2.95 (2H, t, *J* = 7.9 Hz), 2.70 (2H, t, *J* = 7.9 Hz); <sup>13</sup>C{<sup>1</sup>H} NMR (150 MHz, CDCl<sub>3</sub>/TMS) δ (ppm): 176.2, 161.6 (<sup>1</sup>*J*<sub>C-F</sub> = 246.4 Hz), 161.0 (<sup>1</sup>*J*<sub>C-F</sub> = 246.4 Hz), 138.4, 137.8 (<sup>4</sup>*J*<sub>C-F</sub> = 4.3 Hz), 135.9, 135.1 (<sup>4</sup>*J*<sub>C-F</sub> = 2.9 Hz), 131.55 (<sup>3</sup>*J*<sub>C-F</sub> = 7.2 Hz), 131.48 (<sup>3</sup>*J*<sub>C-F</sub> = 8.6 Hz), 128.1, 126.4, 126.3, 117.8, 115.2 (<sup>2</sup>*J*<sub>C-F</sub> = 21.5 Hz), 114.1 (<sup>2</sup>*J*<sub>C-F</sub> = 21.5 Hz), 30.8, 28.2; <sup>19</sup>F NMR (565 MHz, CDCl<sub>3</sub>) δ (ppm): –114.5, –115.2; LRMS (EI) *m/z*: 361 (M<sup>+</sup>); HRMS (EI-TOF) Calcd. for C<sub>23</sub>H<sub>17</sub>F<sub>2</sub>NO: 361.1278, found: 361.1262; IR (neat): 3040, 1736, 1632, 1598, 1505, 1370, 1293, 1153, 831, 758 cm<sup>–1</sup>.

### 5-(Bis(4-chlorophenyl)methylene)-1-phenylpyrrolidin-2-one (**3e**)

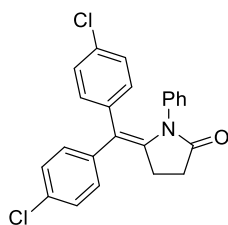

Obtained as colorless needles in 82% (65.5 mg, **3e** : **2e** = 94 : 6), recrystallized from DCM/hexane, mp. 204–206 °C.

<sup>1</sup>H NMR (600 MHz, CDCl<sub>3</sub>/TMS) δ (ppm): 7.28 (2H, d, *J* = 8.2 Hz), 7.09 (2H, d, *J* = 8.2 Hz), 7.04–7.01 (2H, m), 6.98 (1H, d, *J* = 6.9 Hz), 6.95 (2H, d, *J* = 7.6 Hz), 6.79 (2H, d, *J* = 8.2 Hz), 6.61 (2H, d, *J* = 8.2 Hz), 2.96 (2H, t, *J* = 7.7 Hz), 2.71 (2H, t, *J* = 7.7 Hz); <sup>13</sup>C{<sup>1</sup>H} NMR (150 MHz, CDCl<sub>3</sub>/TMS) δ (ppm): 176.1, 140.0, 139.1, 137.3, 135.8, 132.7, 132.0, 131.30, 131.26, 128.5, 128.2, 127.4, 126.5, 126.3, 117.4, 30.7, 28.2; LRMS (EI) *m/z*: 393 (M<sup>+</sup>); HRMS (EI-TOF) Calcd. for C<sub>23</sub>H<sub>17</sub><sup>35</sup>Cl<sub>2</sub>NO: 393.0687, found: 393.0671; IR (neat): 3064, 2944, 1732, 1612, 1488, 1355, 1156, 1012, 828, 756 cm<sup>–1</sup>.

### 5-(5H-Dibenzo[*a,d*][7]annulen-5-ylidene)-1-phenylpyrrolidin-2-one (**3h**)

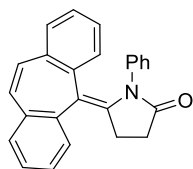

Obtained as colorless crystals in 66% (46.3 mg), recrystallized from DCM/hexane, mp. 199–200 °C.

<sup>1</sup>H-NMR (600 Hz, DMSO-*d*<sub>6</sub>) δ (ppm): 7.42–7.36 (3H, m), 7.27–7.24 (1H, m), 7.02–6.89 (6H, m), 6.83–6.56 (5H, m), 3.12–3.08 (1H, m), 2.70–2.64 (1H, m), 2.45–2.41 (1H, m), 2.26–2.21

(1H, m);  $^{13}\text{C}\{^1\text{H}\}$  NMR (150 Hz, DMSO- $d_6$ ),  $\delta$  (ppm): 176.3, 138.3, 137.1, 136.8, 136.4, 134.9, 133.8, 131.3, 130.9, 128.9, 128.7, 128.3, 128.1, 127.8, 127.3, 127.2, 127.0, 126.4, 126.3, 125.6, 114.1, 28.7, 24.2; LRMS (EI)  $m/z$ : 349 ( $\text{M}^+$ ); HRMS (EI-TOF) Calcd. for  $\text{C}_{25}\text{H}_{19}\text{NO}$ : 349.1467, found: 349.1465; IR (neat): 3017, 1717, 1636, 1497, 1370, 1239, 1171, 803, 738  $\text{cm}^{-1}$ .

#### 5-(Diphenylmethylene)-1-(4-methoxyphenyl)pyrrolidin-2-one (**3i**)

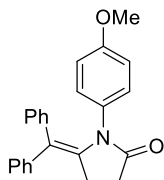

Obtained as colorless needles in 76% (54.7 mg, **3i** : **2i** = 93 : 7), recrystallized from DCM/hexane, mp. 158–161  $^{\circ}\text{C}$ .

$^1\text{H}$  NMR (600 MHz,  $\text{CDCl}_3/\text{TMS}$ )  $\delta$  (ppm): 7.29 (2H, t,  $J$  = 7.6 Hz), 7.22 (1H, t,  $J$  = 7.2 Hz), 7.18 (2H, d,  $J$  = 6.9 Hz), 6.88–6.84 (5H, m), 6.71–6.70 (2H, m), 6.50 (2H, d,  $J$  = 8.9 Hz), 3.65 (3H, s), 2.96 (2H, t,  $J$  = 7.9 Hz), 2.67 (2H, t,  $J$  = 7.9 Hz);  $^{13}\text{C}\{^1\text{H}\}$  NMR (150 MHz,  $\text{CDCl}_3/\text{TMS}$ )  $\delta$  (ppm): 176.6, 157.6, 142.2, 139.1, 138.2, 130.2, 129.9, 129.1, 128.2, 127.5, 127.1, 126.6, 125.9, 119.7, 113.4, 55.4, 30.7, 28.1; LRMS (EI)  $m/z$ : 355 ( $\text{M}^+$ ); HRMS (EI-TOF) Calcd. for  $\text{C}_{24}\text{H}_{21}\text{NO}_2$ : 355.1572, found: 355.1549; IR (neat): 3257, 1700, 1636, 1511, 1444, 1242, 1031, 741  $\text{cm}^{-1}$ .

#### 5-(Diphenylmethylene)-1-(*p*-tolyl)pyrrolidin-2-one (**3j**)

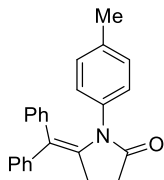

Obtained as yellow oil in 92% (62.7 mg, **3j** : **2j** = 93 : 7).

$^1\text{H}$  NMR (600 MHz,  $\text{CDCl}_3/\text{TMS}$ )  $\delta$  (ppm): 7.30 (2H, t,  $J$  = 7.5 Hz), 7.22 (1H, tt,  $J$  = 7.4, 1.5 Hz), 7.19–7.17 (2H, m), 6.85–6.80 (5H, m), 6.76 (2H, d,  $J$  = 8.1 Hz), 6.71–6.69 (2H, m), 2.98–2.95 (2H, m), 2.69–2.67 (2H, m), 2.13 (3H, s);  $^{13}\text{C}\{^1\text{H}\}$  NMR (150 MHz,  $\text{CDCl}_3/\text{TMS}$ )  $\delta$  (ppm): 176.5, 142.2, 139.2, 138.1, 135.8, 133.5, 130.2, 130.0, 128.5, 128.2, 127.1, 126.6, 126.2, 125.7, 119.9, 30.8, 28.2, 20.8; LRMS (EI)  $m/z$ : 339 ( $\text{M}^+$ ); HRMS (EI-TOF) Calcd. for  $\text{C}_{24}\text{H}_{21}\text{NO}$ : 339.1623, found: 339.1617; IR (neat): 3057, 1718, 1631, 1512, 1364, 1229, 1167, 1030, 816, 751  $\text{cm}^{-1}$ .

### 5-(Diphenylmethylene)-1-(4-isopropylphenyl)pyrrolidin-2-one (**3k**)

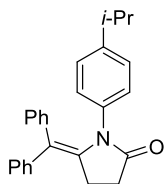

Obtained as colorless oil in 99% (72.5 mg, **3k** : **2k** = 92 : 8).

$^1\text{H}$  NMR (600 MHz,  $\text{CDCl}_3/\text{TMS}$ )  $\delta$  (ppm): 7.29 (2H, t,  $J = 7.6$  Hz), 7.22 (1H, t,  $J = 7.6$  Hz), 7.18 (2H, d,  $J = 7.6$  Hz), 6.85 (2H, d,  $J = 8.9$  Hz), 6.80–6.79 (5H, m), 6.67 (2H, dd,  $J = 6.5, 3.1$  Hz), 2.96 (2H, t,  $J = 7.9$  Hz), 2.70–2.65 (3H, m), 1.09 (6H, d,  $J = 6.8$  Hz);  $^{13}\text{C}\{^1\text{H}\}$  NMR (150 MHz,  $\text{CDCl}_3/\text{TMS}$ )  $\delta$  (ppm): 176.5, 146.8, 142.2, 139.1, 138.1, 133.6, 130.1, 129.9, 128.2, 127.0, 126.5, 126.3, 126.0, 125.8, 119.7, 33.7, 30.7, 28.1, 23.9; LRMS (EI)  $m/z$ : 367 ( $\text{M}^+$ ); HRMS (EI-TOF) Calcd. for  $\text{C}_{26}\text{H}_{25}\text{NO}$ : 367.1936, found: 367.1925; IR (neat): 3018, 2959, 1723, 1630, 1512, 1364, 1300, 1229, 1167, 832  $\text{cm}^{-1}$ .

### 5-(Diphenylmethylene)-1-(4-fluorophenyl)pyrrolidin-2-one (**3l**)

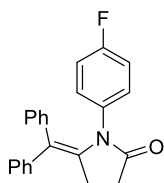

Obtained as colorless needle in 92% (63.4 mg, **3l** : **2l** = 93 : 7), recrystallized from DCM/hexane, mp. 128–130  $^{\circ}\text{C}$ .

$^1\text{H}$  NMR (600 MHz,  $\text{CDCl}_3/\text{TMS}$ )  $\delta$  (ppm): 7.32–7.29 (2H, m), 7.25–7.22 (1H, m), 7.18–7.16 (2H, m), 6.96–6.93 (2H, m), 6.91–6.85 (3H, m), 6.72–6.70 (2H, m), 6.68–6.65 (2H, m), 3.00–2.97 (2H, m), 2.70–2.68 (2H, m);  $^{13}\text{C}\{^1\text{H}\}$  NMR (150 MHz,  $\text{CDCl}_3/\text{TMS}$ )  $\delta$  (ppm): 176.4, 160.5 ( $^1J_{\text{C-F}} = 245.0$  Hz), 141.9, 139.1, 137.9, 132.1 ( $^4J_{\text{C-F}} = 2.9$  Hz) 130.2, 129.9, 128.2, 128.0 ( $^3J_{\text{C-F}} = 8.6$  Hz), 127.3, 126.8, 126.2, 120.2, 114.8 ( $^2J_{\text{C-F}} = 22.9$  Hz), 30.8, 28.2;  $^{19}\text{F}$  NMR (565 MHz,  $\text{CDCl}_3$ )  $\delta$  (ppm): –115.1; LRMS (EI)  $m/z$ : 343 ( $\text{M}^+$ ); HRMS (EI-TOF) Calcd. For  $\text{C}_{23}\text{H}_{18}\text{FN}$ : 343.1372, found: 343.1352; IR (neat): 3058, 1724, 1633, 1604, 1507, 1368, 1299, 1228, 1153, 910, 752  $\text{cm}^{-1}$ .

### 1-(4-Chlorophenyl)-5-(diphenylmethylene)pyrrolidin-2-one (**3m**)

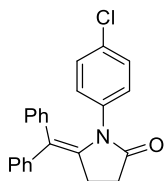

Obtained as colorless needles in 76% (55.4 mg), recrystallized from DCM/hexane, mp. 165–167 °C.

$^1\text{H}$  NMR (600 MHz,  $\text{CDCl}_3/\text{TMS}$ )  $\delta$  (ppm): 7.31 (2H, t,  $J = 7.6$  Hz), 7.25–7.22 (1H, m), 7.18–7.17 (2H, m), 6.94–6.86 (7H, m), 6.72–6.70 (2H, m), 2.98 (2H, t,  $J = 7.9$  Hz), 2.69 (2H, t,  $J = 7.9$  Hz);  $^{13}\text{C}\{^1\text{H}\}$  NMR (150 MHz,  $\text{CDCl}_3/\text{TMS}$ )  $\delta$  (ppm): 176.1, 141.7, 139.0, 137.6, 134.6, 131.4, 130.1, 129.9, 128.2, 128.0, 127.42, 127.38, 126.8, 126.2, 120.5, 30.9, 28.2; LRMS (EI)  $m/z$ : 359 ( $\text{M}^+$ ); HRMS (EI-TOF) Calcd. for  $\text{C}_{23}\text{H}_{18}^{35}\text{ClNO}$ : 359.1077, found: 359.1092; IR (neat): 3076, 2929, 1719, 1636, 1492, 1364, 1300, 1233, 1165, 1088, 833  $\text{cm}^{-1}$ .

### 1-(4-Bromophenyl)-5-(diphenylmethylene)pyrrolidin-2-one (**3n**)

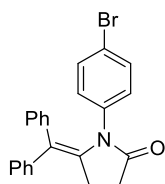

Obtained as colorless needles in 80% (64.7 mg, **3n** : **2n** = 96 : 4), recrystallized from DCM/hexane, mp. 188–189 °C.

$^1\text{H}$  NMR (600 MHz,  $\text{CDCl}_3/\text{TMS}$ )  $\delta$  (ppm): 7.30 (2H, t,  $J = 7.6$  Hz), 7.25–7.24 (1H, m), 7.17 (2H, d,  $J = 7.5$  Hz), 7.08 (2H, d,  $J = 8.9$  Hz), 6.91 (1H, t,  $J = 9.6$  Hz), 6.87–6.85 (4H, m), 6.70 (2H, d,  $J = 7.6$  Hz), 2.98 (2H, t,  $J = 7.9$  Hz), 2.68 (2H, t,  $J = 7.9$  Hz);  $^{13}\text{C}\{^1\text{H}\}$  NMR (150 MHz,  $\text{CDCl}_3/\text{TMS}$ )  $\delta$  (ppm): 176.1, 141.7, 139.0, 137.5, 135.1, 131.0, 130.1, 129.9, 128.2, 127.7, 127.4, 126.8, 126.2, 120.5, 119.4, 30.9, 28.2; LRMS (EI)  $m/z$ : 403 ( $\text{M}^+$ ); HRMS (EI-TOF) Calcd. For  $\text{C}_{23}\text{H}_{18}^{79}\text{BrNO}$ : 403.0572, found: 403.0550; IR (neat): 3074, 1718, 1636, 1488, 1365, 1301, 1235, 1166, 1067, 1012  $\text{cm}^{-1}$ .

### 5-(Diphenylmethylene)-1-(4-(trifluoromethyl)phenyl)pyrrolidin-2-one (**3o**)

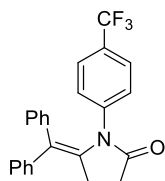

Obtained as yellow crystals in 69% (54.4 mg, **3o** : **2o** = 95 : 5), recrystallized from DCM/hexane, mp. 169–170 °C.

$^1\text{H}$  NMR (600 MHz,  $\text{CDCl}_3/\text{TMS}$ )  $\delta$  (ppm): 7.32 (2H, t,  $J = 7.6$  Hz), 7.26–7.18 (5H, m), 7.10 (2H, d,  $J = 8.3$  Hz), 6.84–6.83 (3H, m), 6.69 (2H, dd,  $J = 7.6, 1.4$  Hz), 3.01 (2H, t,  $J = 7.7$  Hz), 2.72 (2H, t,  $J = 7.7$  Hz);  $^{13}\text{C}\{^1\text{H}, ^{19}\text{F}\}$  NMR (150 MHz,  $\text{CDCl}_3/\text{TMS}$ )  $\delta$  (ppm): 176.0, 141.5, 139.1, 139.0, 137.2, 130.0, 129.9, 128.2, 127.8, 127.4, 126.9, 126.4, 126.3, 125.0, 123.7, 121.0, 31.0, 28.2;  $^{19}\text{F}$  NMR (565 MHz,  $\text{CDCl}_3$ )  $\delta$  (ppm): –62.1; LRMS (EI)  $m/z$ : 393 ( $\text{M}^+$ ); HRMS (EI-TOF)



Calcd. For  $C_{24}H_{18}F_3NO$ : 393.1340, found: 393.1328; IR (neat): 3060, 1721, 1636, 1592, 1490, 1366, 1324, 1232, 1161, 851, 753  $cm^{-1}$ .

**4-(2-(Diphenylmethylene)-5-oxopyrrolidin-1-yl)benzonitrile (3p)**

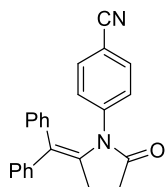

Obtained as colorless crystals in 84% (59.1 mg, **3p** : **2p** = 98 : 2), recrystallized from DCM/hexane, mp. 200–201 °C.

$^1H$  NMR (600 MHz,  $CDCl_3$ /TMS)  $\delta$  (ppm): 7.32 (2H, t,  $J$  = 7.5 Hz), 7.28–7.25 (3H, m), 7.18 (2H, d,  $J$  = 6.9 Hz), 7.14 (2H, d,  $J$  = 8.3 Hz), 6.90–6.86 (3H, m), 6.72–6.71 (2H, m), 3.01 (2H, t,  $J$  = 7.7 Hz), 2.73 (2H, t,  $J$  = 7.7 Hz);  $^{13}C\{^1H\}$  NMR (150 MHz,  $CDCl_3$ /TMS)  $\delta$  (ppm): 175.8, 141.2, 140.0, 139.0, 136.73, 136.72, 131.8, 129.9, 128.3, 127.6, 127.1, 126.7, 126.2, 121.8, 118.5, 108.9, 31.2, 28.3; LRMS (EI)  $m/z$ : 350 ( $M^+$ ); HRMS (EI-TOF) Calcd. For  $C_{24}H_{18}N_2O$ : 350.1419, found: 350.1396; IR (neat): 3044, 2224, 1721, 1635, 1601, 1506, 1355, 1227, 1162, 844  $cm^{-1}$ .

**Methyl 4-(2-(diphenylmethylene)-5-oxopyrrolidin-1-yl)benzoate (3q)**

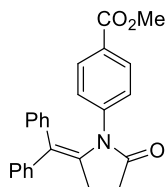

Obtained as colorless crystals in 84% (64.4 mg, **3q** : **2q** = 98 : 2), recrystallized from DCM/hexane, mp. 191–192 °C.

$^1H$  NMR (600 MHz,  $CDCl_3$ /TMS)  $\delta$  (ppm): 7.65 (2H, d,  $J$  = 8.9 Hz), 7.31 (2H, t,  $J$  = 7.6 Hz), 7.26–7.24 (1H, m), 7.19 (2H, d,  $J$  = 6.8 Hz), 7.09 (2H, d,  $J$  = 8.2 Hz), 6.85–6.81 (3H, m), 6.73 (2H, d,  $J$  = 7.6 Hz), 3.84 (3H, s), 3.00 (2H, t,  $J$  = 7.9 Hz), 2.71 (2H, t,  $J$  = 7.9 Hz);  $^{13}C\{^1H\}$  NMR (150 MHz,  $CDCl_3$ /TMS)  $\delta$  (ppm): 176.0, 166.4, 141.6, 140.2, 139.0, 137.3, 130.0, 129.3, 128.2, 127.4, 127.1, 126.9, 126.40, 126.39, 125.6, 121.4, 52.0, 31.2, 28.4; LRMS (EI)  $m/z$ : 383 ( $M^+$ ); HRMS (EI-TOF) Calcd. For  $C_{25}H_{21}NO_3$ : 383.1521, found: 383.1511; IR (neat): 3056, 2952, 1723, 1710, 1630, 1439, 1361, 1278, 1227, 855, 765  $cm^{-1}$ .

### 1-(3-Bromophenyl)-5-(diphenylmethylene)pyrrolidin-2-one (**3r**)

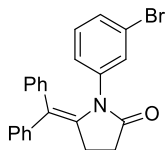

Obtained as yellow crystals in 78% (63.2 mg, **3r** : **2r** = 95 : 5), recrystallized from DCM/hexane, mp. 138–140 °C.

$^1\text{H}$  NMR (600 MHz,  $\text{CDCl}_3/\text{TMS}$ )  $\delta$  (ppm): 7.31 (2H, t,  $J = 7.5$  Hz), 7.25–7.23 (1H, m), 7.18 (2H, d,  $J = 7.5$  Hz), 7.06 (1H, s), 7.01 (2H, d,  $J = 8.0$  Hz), 6.92–6.85 (4H, m), 6.74 (2H, d,  $J = 6.5$  Hz), 2.99 (2H, t,  $J = 7.8$  Hz), 2.69 (2H, t,  $J = 7.8$  Hz);  $^{13}\text{C}\{^1\text{H}\}$  NMR (150 MHz,  $\text{CDCl}_3/\text{TMS}$ )  $\delta$  (ppm): 176.0, 141.6, 139.0, 137.4, 137.1, 129.93, 129.91, 129.4, 129.1, 129.0, 128.2, 127.4, 126.8, 126.3, 124.9, 121.4, 120.8, 30.9, 28.2; LRMS (EI)  $m/z$ : 403 ( $\text{M}^+$ ); HRMS (EI-TOF) Calcd. For  $\text{C}_{23}\text{H}_{18}^{79}\text{BrNO}$ : 403.0572, found: 403.0580; IR (neat): 3057, 1724, 1631, 1590, 1571, 1476, 1352, 1220, 1155, 764  $\text{cm}^{-1}$ .

### 1-(Benzo[d]thiazol-2-yl)-5-(diphenylmethylene)pyrrolidin-2-one (**3s**)

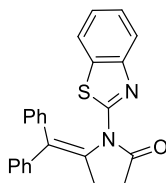

Obtained as colorless needles in 38% (29.9 mg), recrystallized from DCM/hexane, mp. 192–193 °C.

$^1\text{H}$  NMR (600 MHz,  $\text{CDCl}_3/\text{TMS}$ )  $\delta$  (ppm): 7.64 (1H, d,  $J = 8.2$  Hz), 7.45 (1H, d,  $J = 8.3$  Hz), 7.34–7.23 (6H, m), 7.19 (1H, t,  $J = 7.2$  Hz), 6.93 (2H, d,  $J = 7.6$  Hz), 6.82 (2H, t,  $J = 7.9$  Hz), 6.64 (1H, t,  $J = 7.5$  Hz), 3.08 (2H, t,  $J = 7.5$  Hz), 2.79 (2H, t,  $J = 7.5$  Hz);  $^{13}\text{C}\{^1\text{H}\}$  NMR (150 MHz,  $\text{CDCl}_3/\text{TMS}$ )  $\delta$  (ppm): 175.1, 154.2, 148.3, 140.9, 140.3, 134.8, 133.1, 130.2, 129.0, 128.1, 127.3, 127.2, 126.4, 125.7, 125.5, 124.3, 122.1, 120.8, 31.5, 28.5; LRMS (EI)  $m/z$ : 382 ( $\text{M}^+$ ); HRMS (EI-TOF) Calcd. for  $\text{C}_{24}\text{H}_{18}\text{N}_2\text{OS}$  ( $\text{M}^+$ ): 382.1140, found: 382.1167; IR (neat): 3048, 2914, 1723, 1635, 1512, 1279, 1234, 1168, 749  $\text{cm}^{-1}$ .

## 6. Mechanistic experiment

### 5-(Chlorodiphenylmethyl)-1-phenylpyrrolidin-2-one (**4a**)

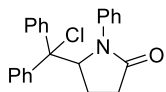

In a glove box, **1a** (65.6 mg, 0.20 mmol),  $\text{CuF}_2$  (2.0 mg, 0.020 mmol), 4-*tert*-butylpyridine (29.3  $\mu\text{L}$ , 0.020 mmol), *t*BuOO*t*Bu (147.0  $\mu\text{L}$ , 0.80 mmol), and 1,2-dichloroethane (2.5 mL) were added

to a sealed tube. The mixture was stirred at 120 °C for 3 h. The reaction was diluted with water (10 mL) and extracted with chloroform (10 mL × 3). The organic layers were washed with brine (10 mL) and dried over MgSO<sub>4</sub> and the solvent was removed under a reduced pressure. The residue was purified by SiO<sub>2</sub> column chromatography.

Obtained as colorless needles in 50% (36.2 mg), recrystallized from DCM/hexane, mp. 156–157 °C.

<sup>1</sup>H NMR (600 MHz, CDCl<sub>3</sub>/TMS) δ (ppm): 7.43 (2H, d, *J* = 6.9 Hz), 7.31–7.23 (5H, m), 7.09 (4H, d, *J* = 4.8 Hz), 7.05–7.01 (3H, m), 7.00–6.96 (1H, m), 5.62 (1H, d, *J* = 8.3 Hz), 2.62–2.54 (1H, m), 2.34–2.28 (2H, m), 2.24–2.15 (1H, m); <sup>13</sup>C {<sup>1</sup>H} NMR (150 MHz, CDCl<sub>3</sub>/TMS) δ (ppm): 175.9, 142.6, 141.2, 138.7, 128.3, 128.2, 128.1, 127.9, 127.8, 127.5, 125.8, 125.77, 125.76, 82.5, 67.5, 30.5, 24.2; LRMS (FAB) *m/z*: 362 (M+H)<sup>+</sup>; HRMS (FAB-EB) Calcd. For C<sub>23</sub>H<sub>21</sub><sup>35</sup>ClNO (M+H)<sup>+</sup>: 362.1312, found: 362.1324; IR (neat): 3067, 1689, 1599, 1499, 1404, 1291, 1039, 749 cm<sup>-1</sup>.

## 7. X-Ray crystallographic data for 4a

Single crystals suitable for X-ray crystallography were obtained by vapor diffusion of hexane into a AcOEt solution of **4a**. A suitable crystal was selected and mounted on a Bruker D8 goniometer diffractometer. The crystal was kept at 93(1) K during data collection. Using Olex2<sup>1)</sup>, the structure was solved with the olex2.solve<sup>2)</sup> structure solution program using Charge Flipping and refined with the SHELXL<sup>3)</sup> refinement package using Least Squares minimization.

Crystallographic data of **4a** has been deposited with Cambridge Crystallographic Data Center, Deposition no. CCDC 2284469. The data can be obtained free of charge from the Cambridge Crystallographic Data Centre via [www.ccdc.cam.ac.uk/data\\_request/cif](http://www.ccdc.cam.ac.uk/data_request/cif).

- 1) Dolomanov, O. V., Bourhis, L. J., Gildea, R. J., Howard, J. A. K. & Puschmann, H. (2009), J. Appl. Cryst. 42, 339–341.
- 2) Bourhis, L. J., Dolomanov, O. V., Gildea, R. J., Howard, J. A. K., Puschmann, H. (2015). Acta Cryst. A71, 59–75.
- 3) Sheldrick, G. M. (2015). Acta Cryst. C71, 3–8.

**Table S5.** Crystal data and structure refinements for **4a**.

|                                                              |                                                                  |
|--------------------------------------------------------------|------------------------------------------------------------------|
| Empirical formula                                            | C <sub>23</sub> H <sub>20</sub> ClNO                             |
| Formula weight                                               | 361.85                                                           |
| Temperature/K                                                | 90(1)                                                            |
| Crystal system                                               | triclinic                                                        |
| Space group                                                  | <i>P</i> -1                                                      |
| <i>a</i> /Å                                                  | 12.583(3)                                                        |
| <i>b</i> /Å                                                  | 13.818(3)                                                        |
| <i>c</i> /Å                                                  | 22.012(5)                                                        |
| $\alpha$ /°                                                  | 106.734(9)                                                       |
| $\beta$ /°                                                   | 90.764(8)                                                        |
| $\gamma$ /°                                                  | 90.173(8)                                                        |
| Volume/Å <sup>3</sup>                                        | 3664.8(15)                                                       |
| <i>Z</i>                                                     | 8                                                                |
| $\rho$ calcg/cm <sup>3</sup>                                 | 1.312                                                            |
| $\mu$ /mm <sup>-1</sup>                                      | 0.220                                                            |
| F(000)                                                       | 1520.0                                                           |
| Crystal size/mm <sup>3</sup>                                 | 0.58 × 0.21 × 0.15                                               |
| Radiation                                                    | MoK $\alpha$ ( $\lambda$ = 0.71073)                              |
| 2 $\Theta$ range for data collection/°                       | 3.864 to 55.906                                                  |
| Index ranges                                                 | -16 ≤ <i>h</i> ≤ 16, -18 ≤ <i>k</i> ≤ 17, 0 ≤ <i>l</i> ≤ 29      |
| Reflections collected                                        | 17725                                                            |
| Independent reflections                                      | 17725 [ <i>R</i> <sub>sigma</sub> = 0.0753]                      |
| Data/restraints/parameters                                   | 17725/0/938                                                      |
| Goodness-of-fit on F <sup>2</sup>                            | 1.029                                                            |
| Final <i>R</i> indexes [ <i>I</i> ≥ 2 $\sigma$ ( <i>I</i> )] | <i>R</i> <sub>1</sub> = 0.0599, w <i>R</i> <sub>2</sub> = 0.1445 |
| Final <i>R</i> indexes [all data]                            | <i>R</i> <sub>1</sub> = 0.0883, w <i>R</i> <sub>2</sub> = 0.1607 |
| Largest diff. peak/hole / e Å <sup>-3</sup>                  | 0.61/-0.66                                                       |

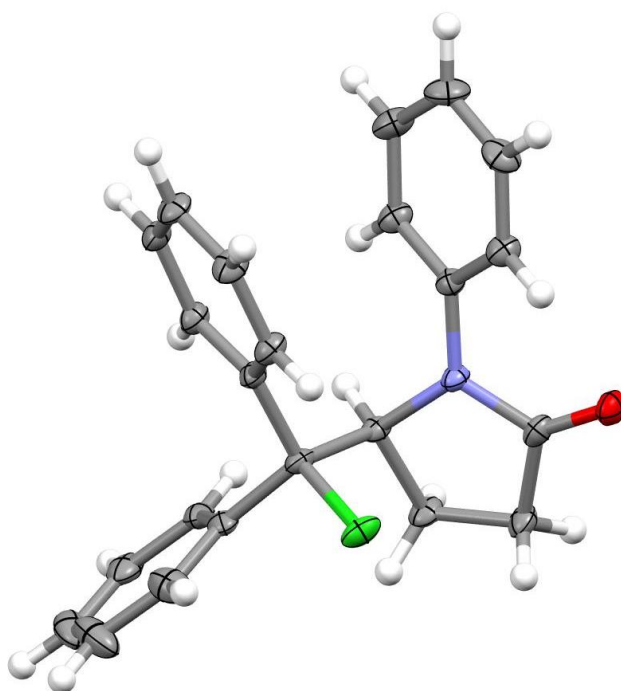

**Figure S1.** ORTEP diagram of **4a** with thermal ellipsoids drawn at 50% probability level (CCDC No. 2284469). Color code of atoms: hydrogen, white; carbon, gray; chlorine, green; nitrogen, blue; oxygen, red.

<sup>1</sup>H-NMR spectrum of **1a** (CDCl<sub>3</sub>, 400 MHz)

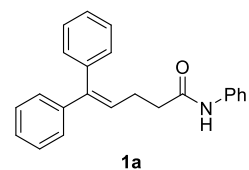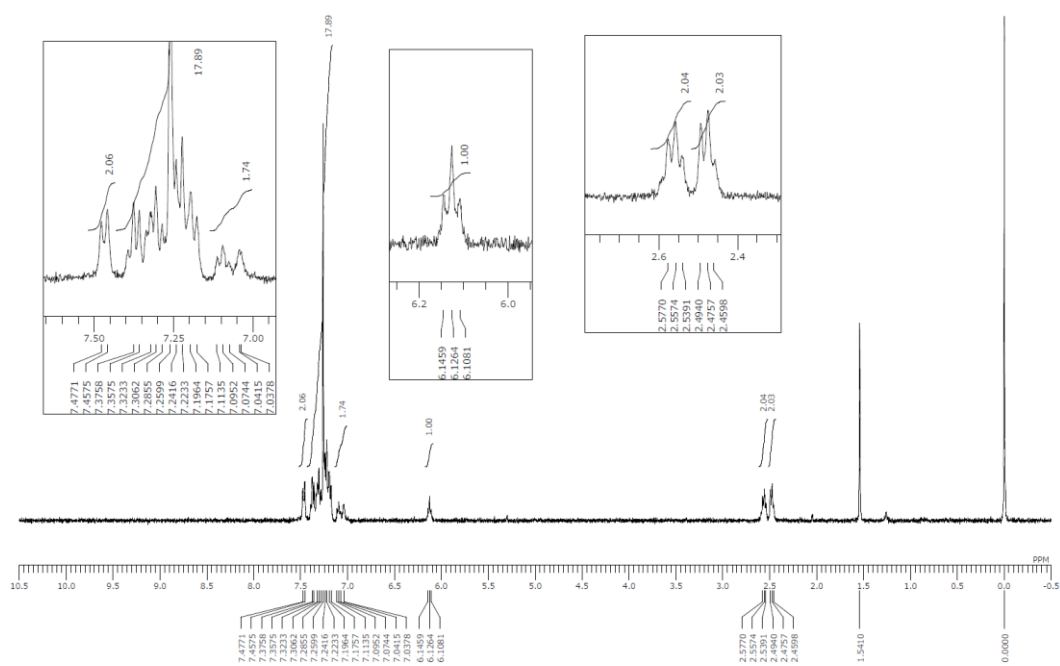

<sup>13</sup>C-NMR spectrum of **1a** (CDCl<sub>3</sub>, 100 MHz)

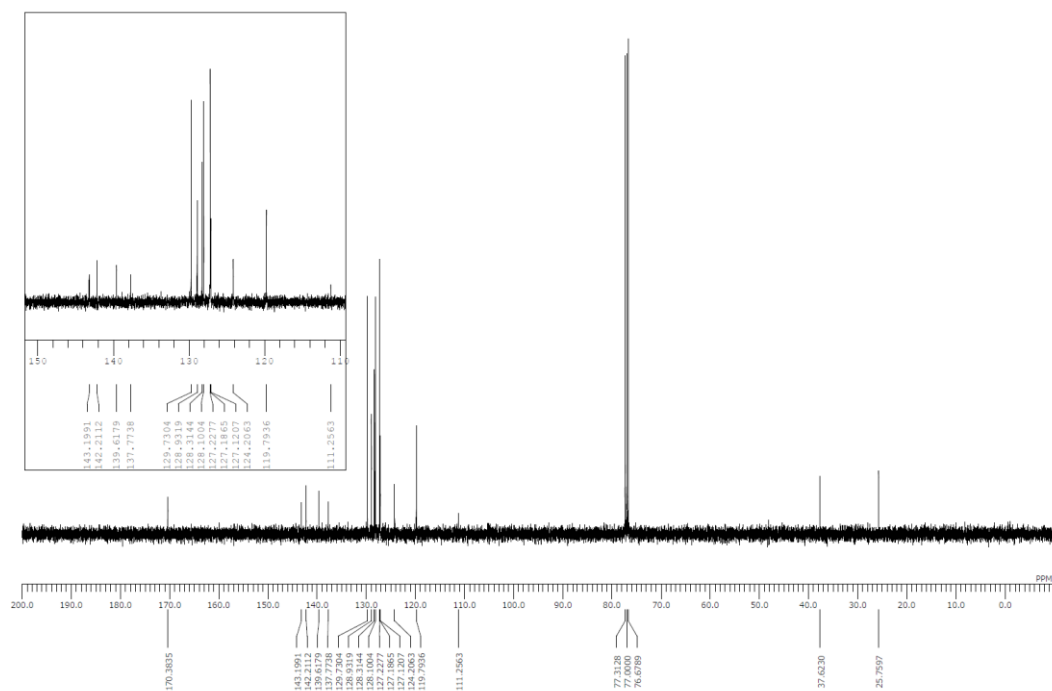

IR spectrum of **1a**

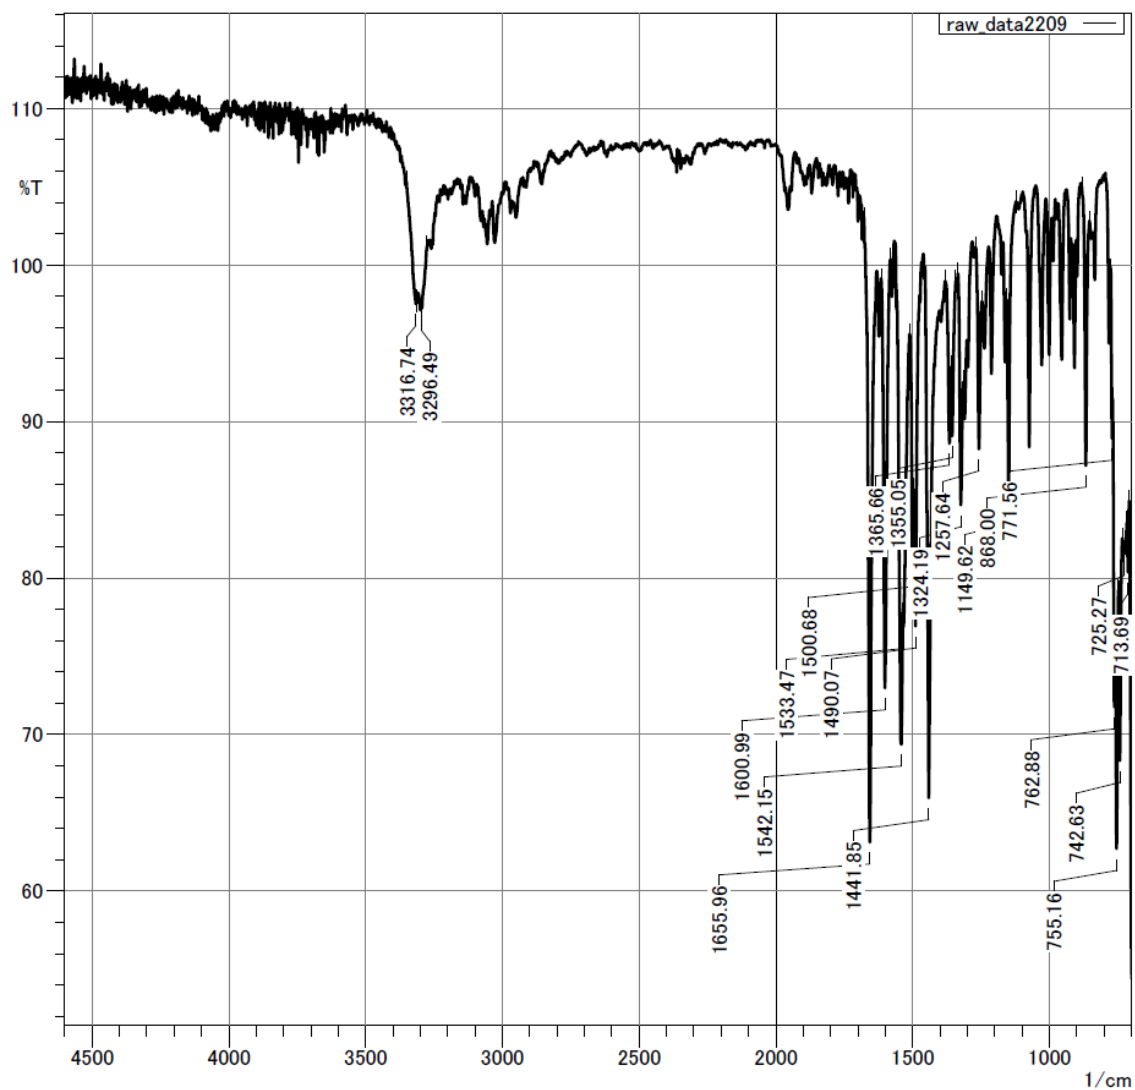

HRMS spectrum of **1a**

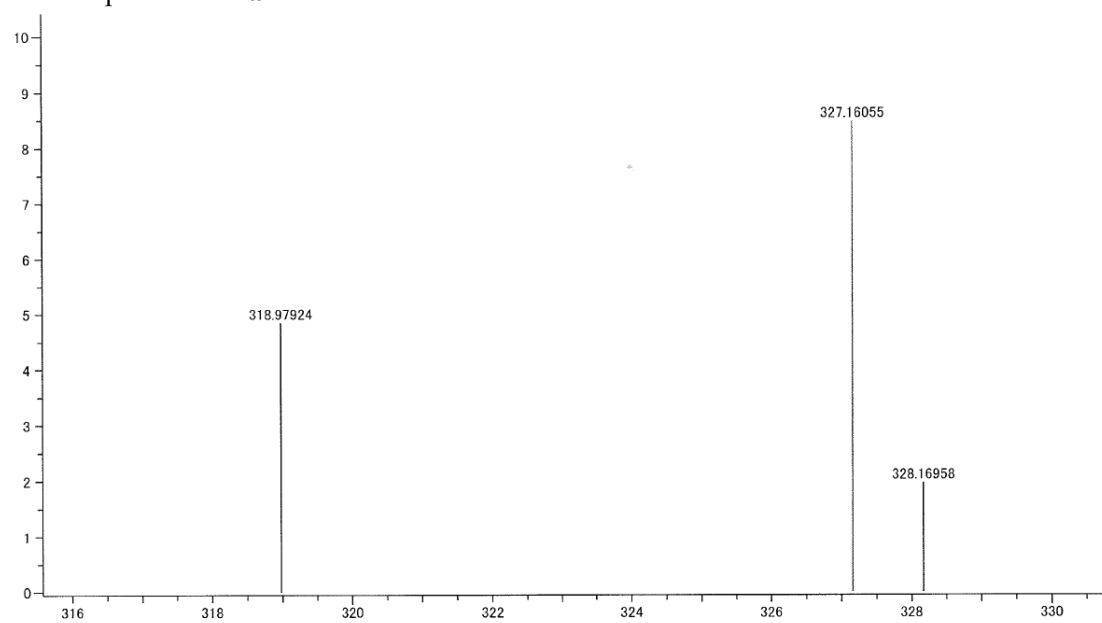

$^1\text{H}$ -NMR spectrum of **1b** ( $\text{CDCl}_3$ , 600 MHz)

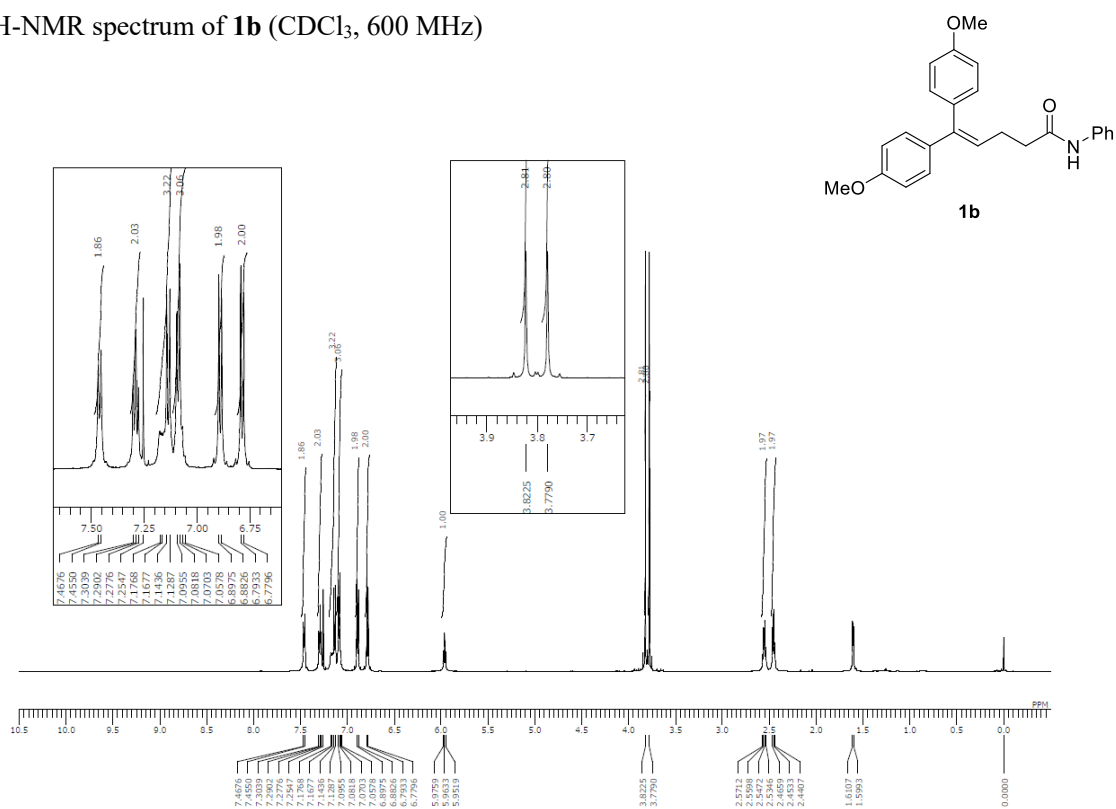

$^{13}\text{C}$ -NMR spectrum of **1b** ( $\text{CDCl}_3$ , 150 MHz)

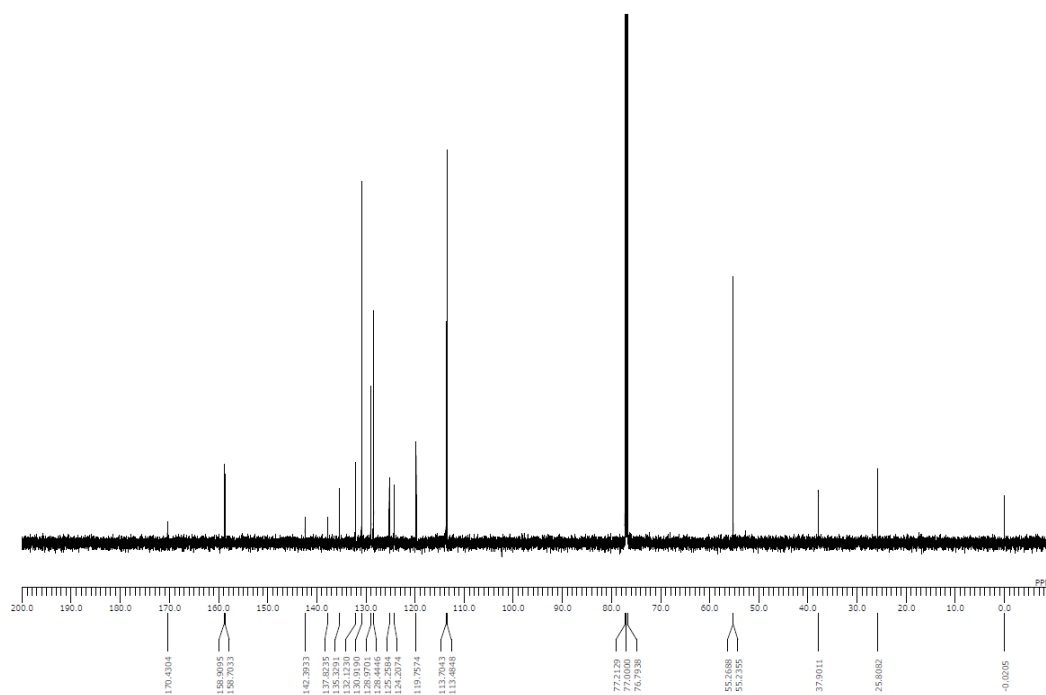



IR spectrum of **1b**

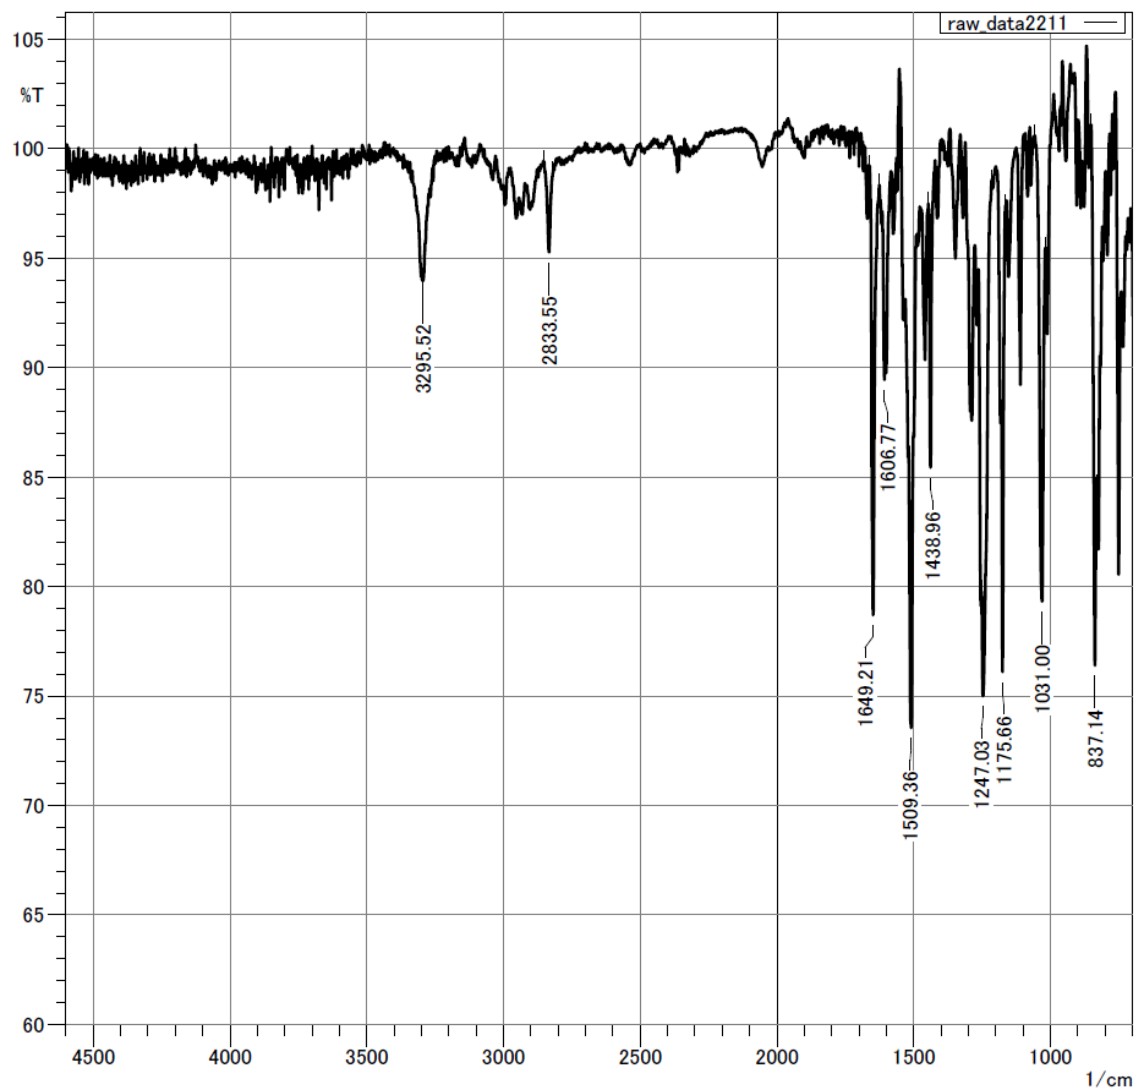

HRMS spectrum of **1b**

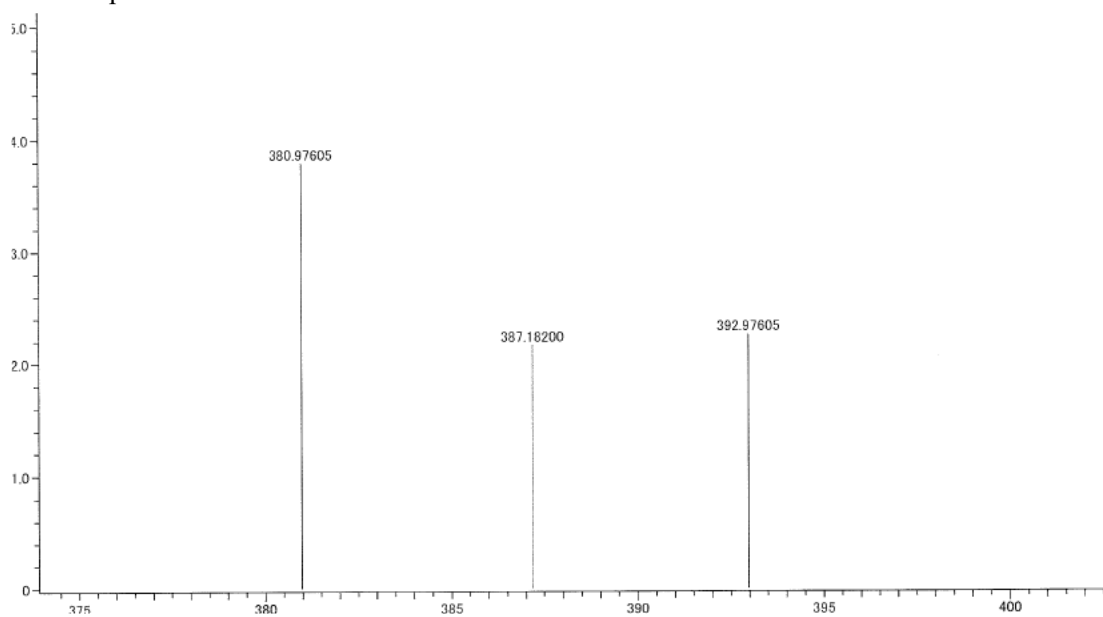

$^1\text{H}$ -NMR spectrum of **1c** ( $\text{CDCl}_3$ , 600 MHz)

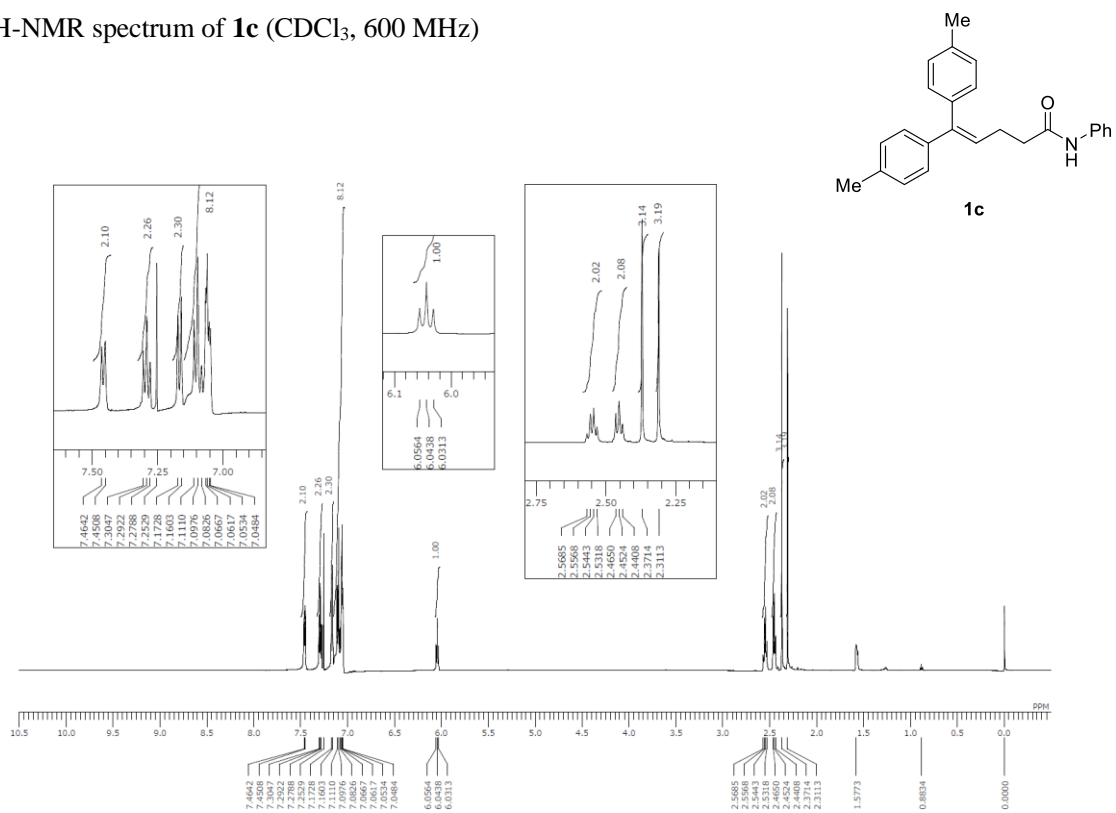

$^{13}\text{C}$ -NMR spectrum of **1c** ( $\text{CDCl}_3$ , 150 MHz)

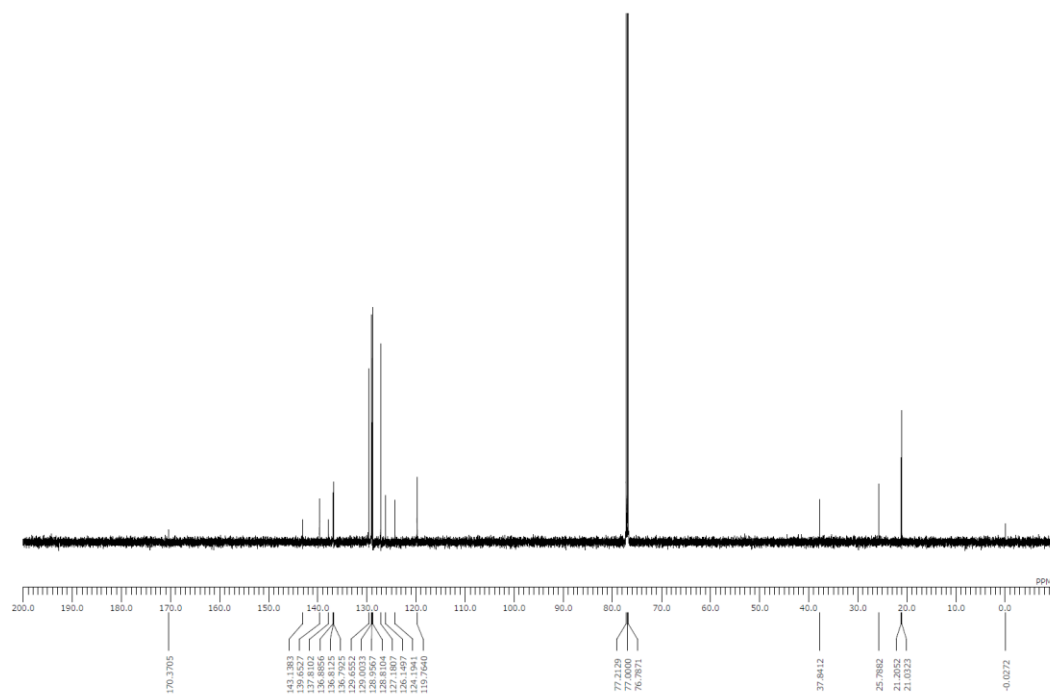

IR spectrum of **1c**

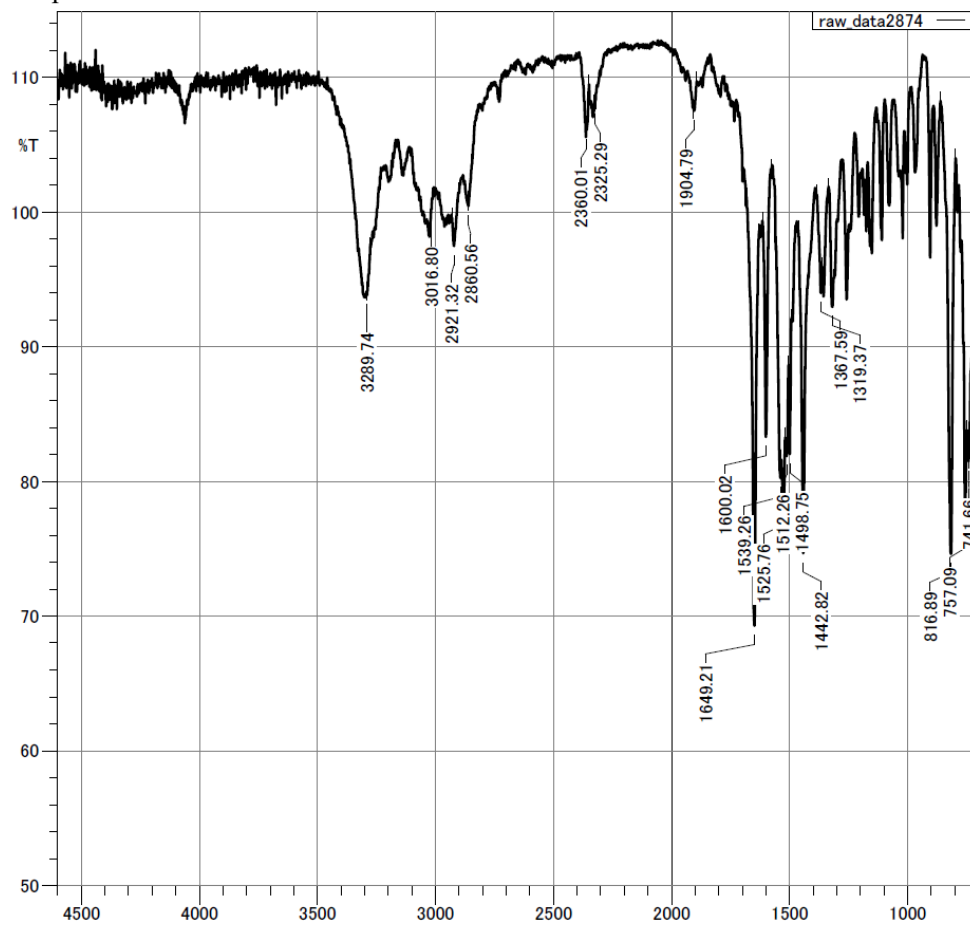

HRMS spectrum of **1c**

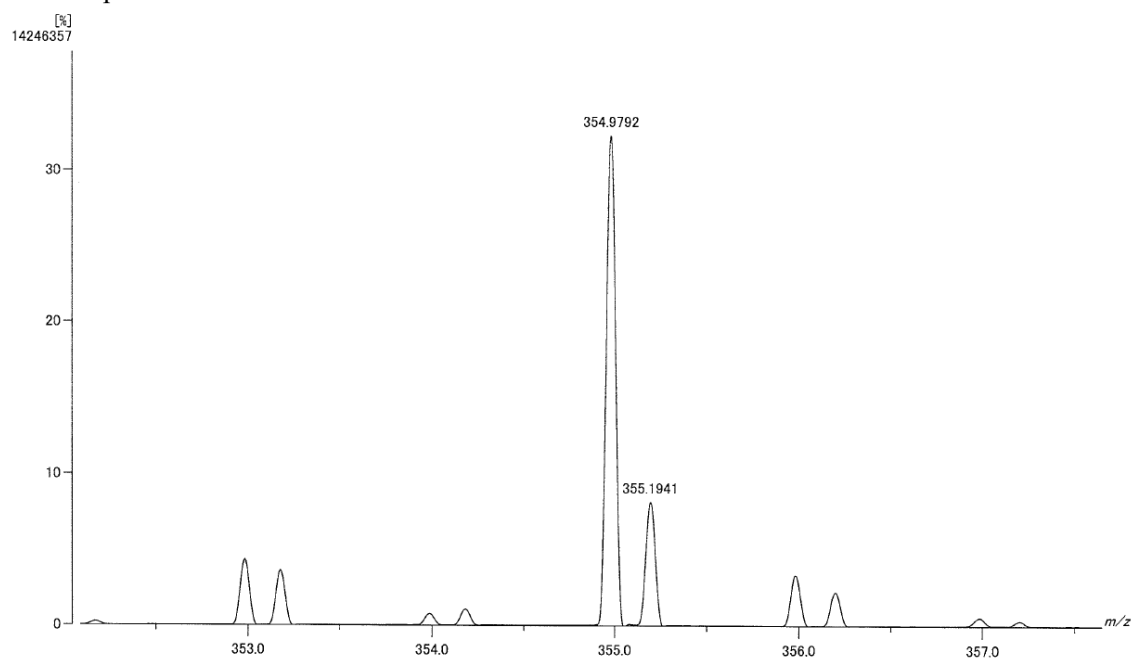

$^1\text{H}$ -NMR spectrum of **1d** ( $\text{CDCl}_3$ , 400 MHz)

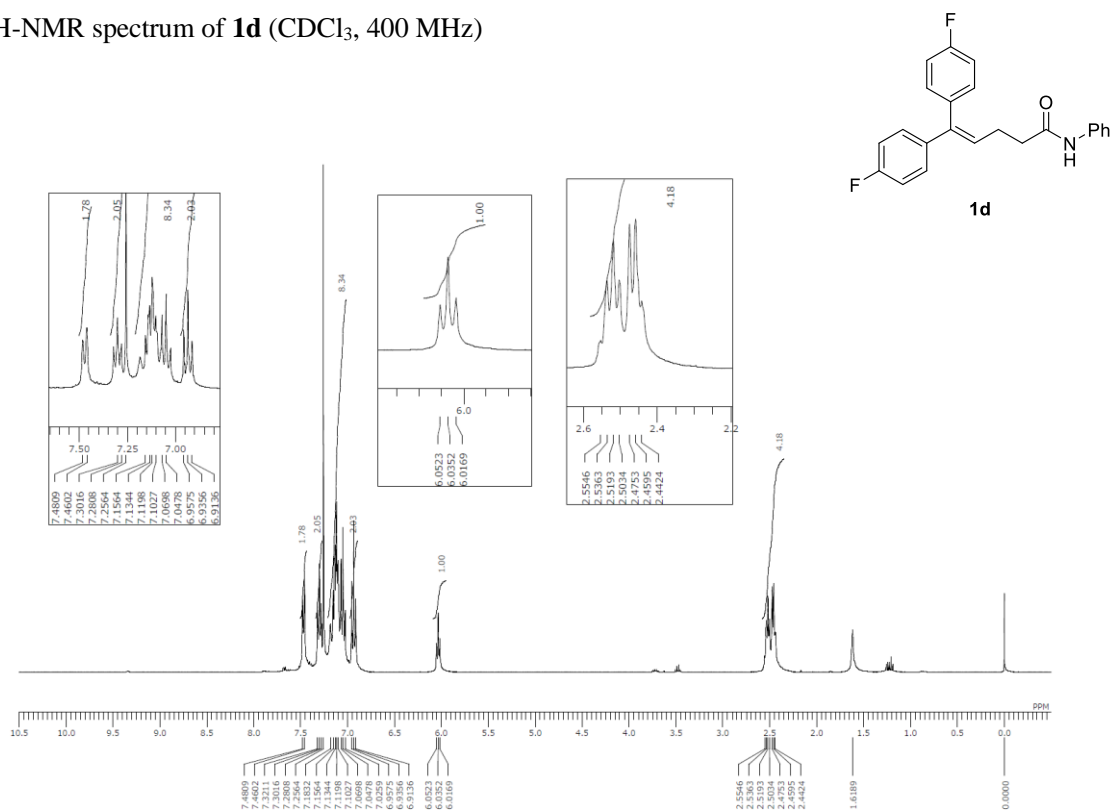

$^{13}\text{C}$ -NMR spectrum of **1d** ( $\text{CDCl}_3$ , 100 MHz)

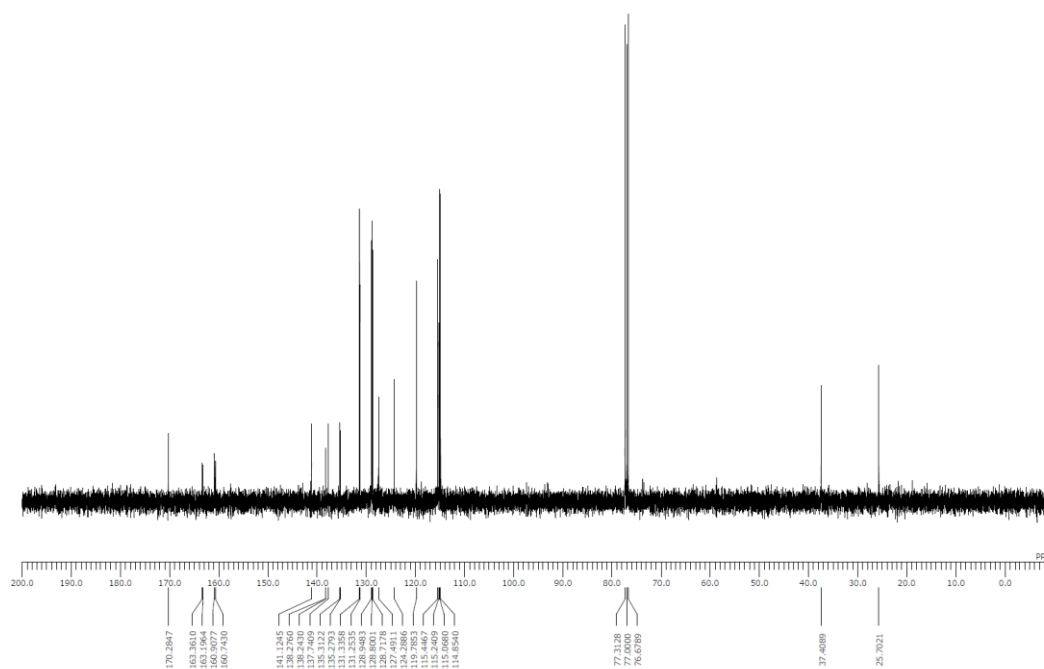

$^{19}\text{F}$ -NMR spectrum of **1d** ( $\text{CDCl}_3$ , 565 MHz)

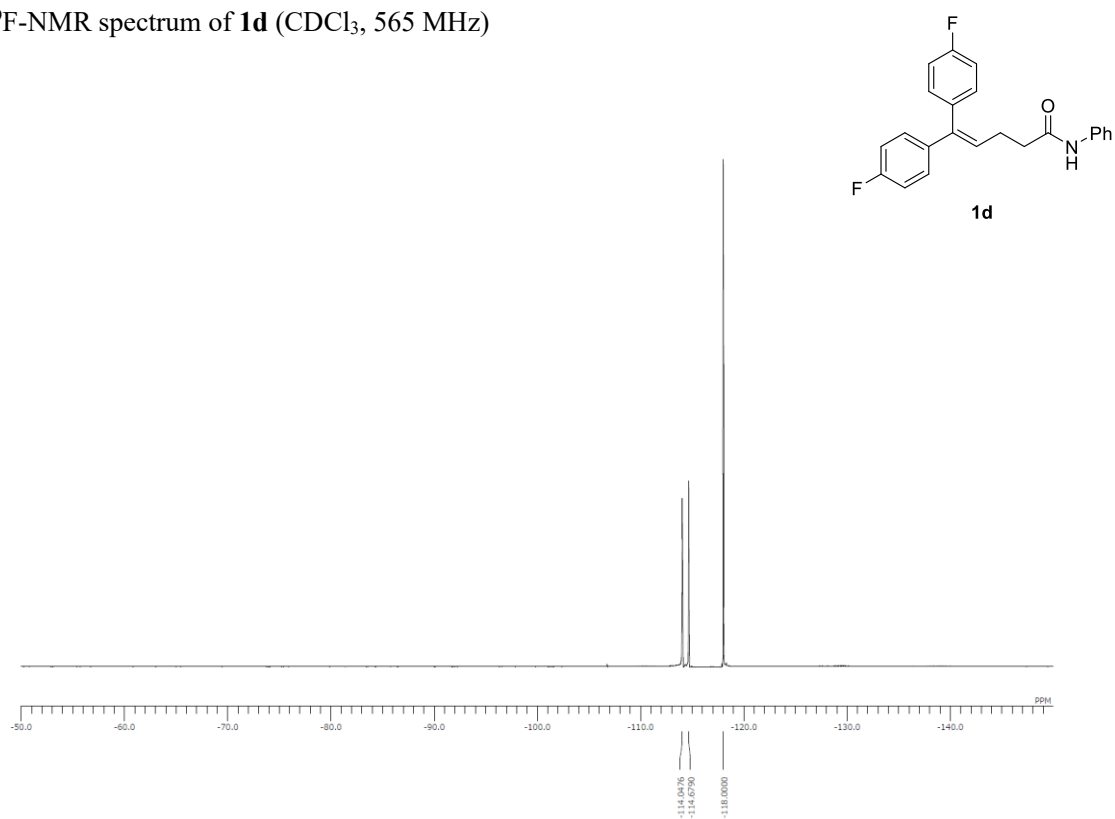

IR spectrum of **1d**

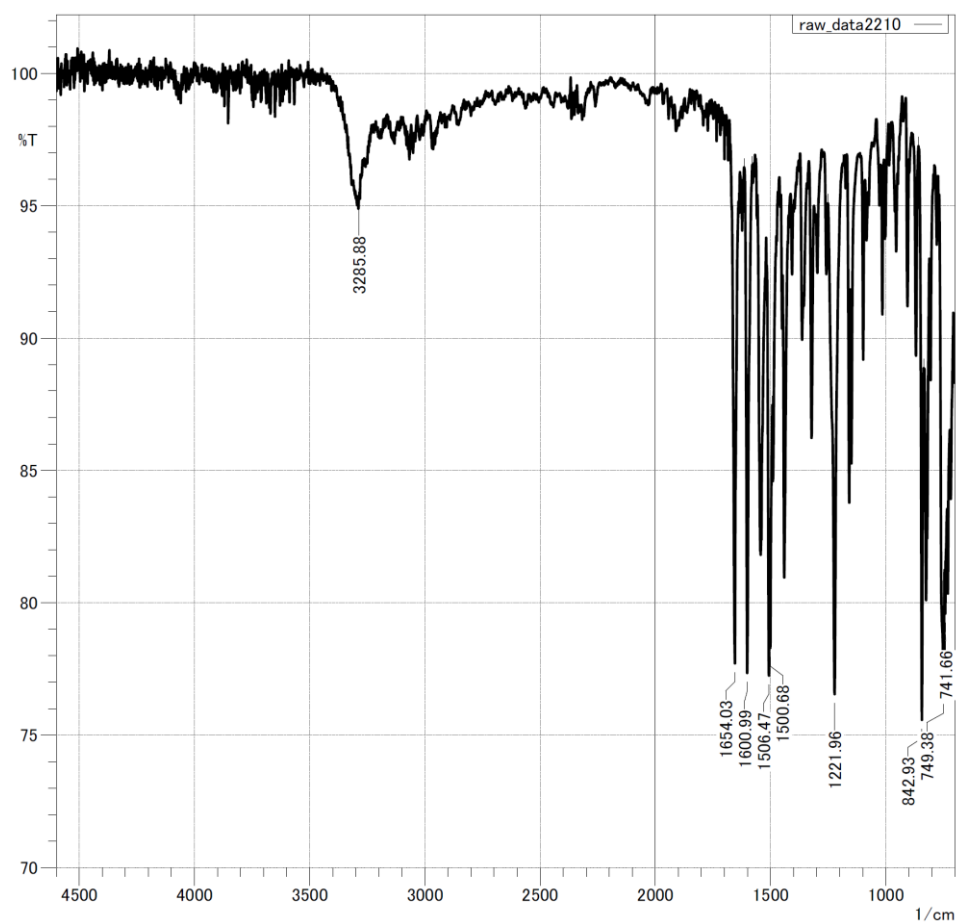

HRMS spectrum of **1d**

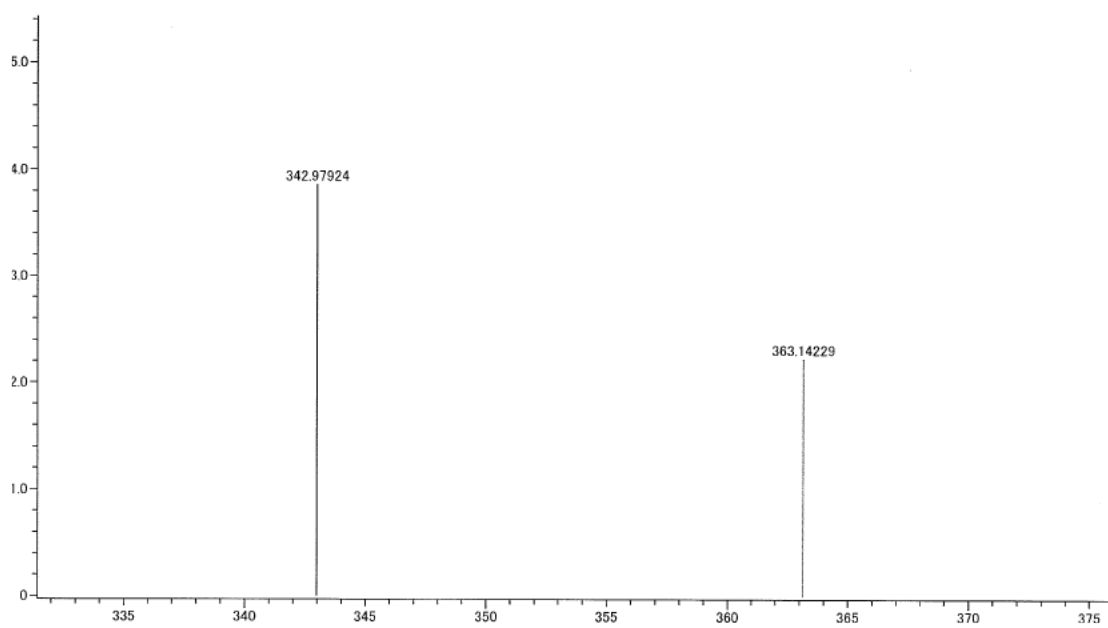

$^1\text{H}$ -NMR spectrum of **1e** (DMSO- $d_6$ , 600 MHz)

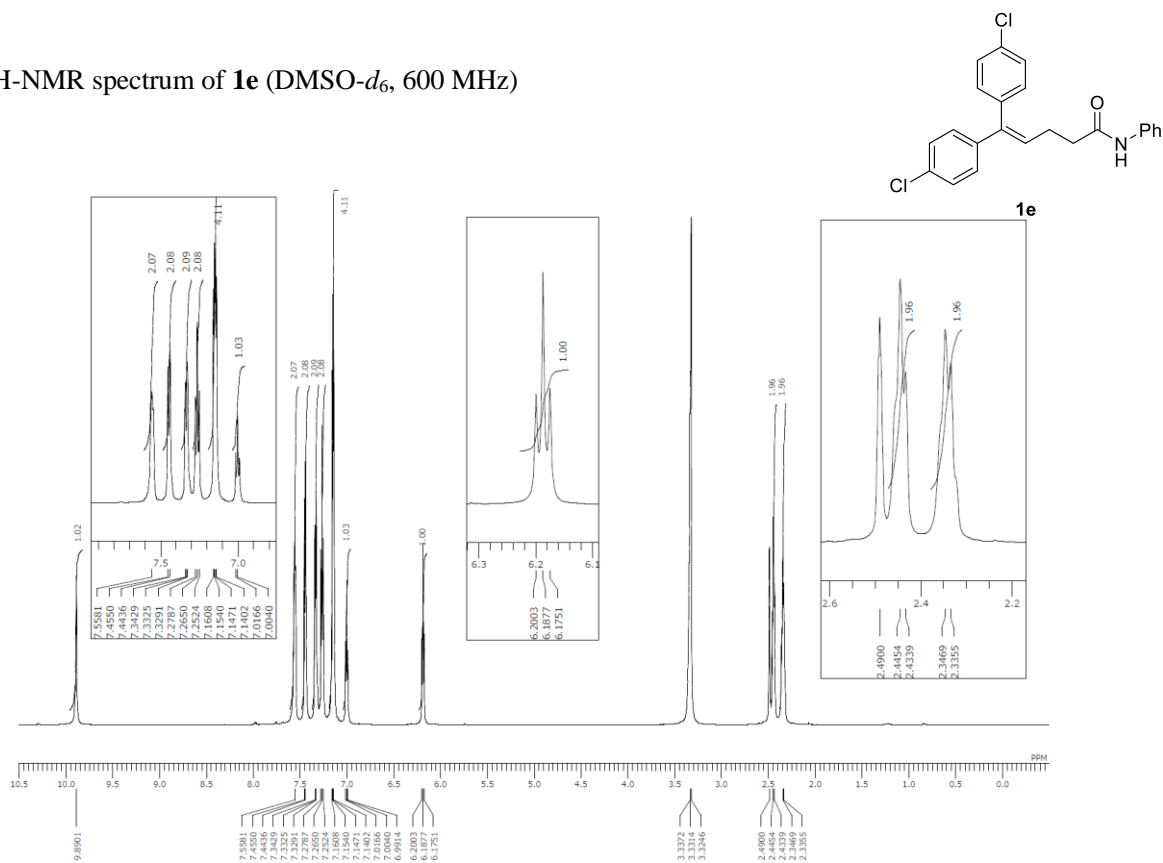

$^{13}\text{C}$ -NMR spectrum of **1e** (DMSO- $d_6$ , 150 MHz)

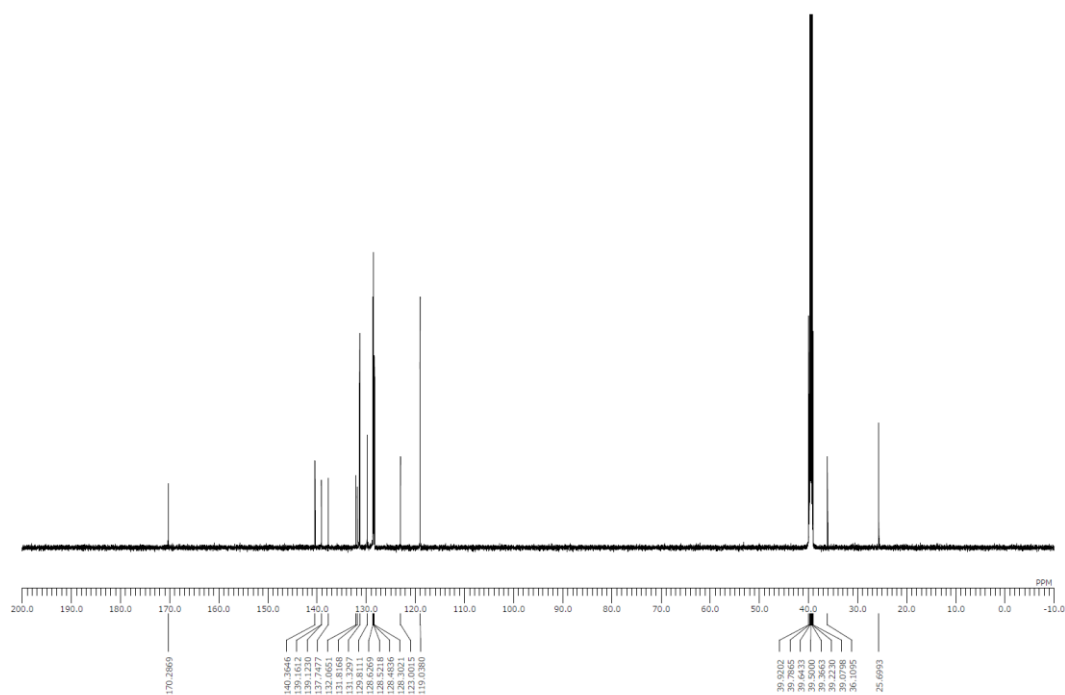

IR spectrum of **1e**

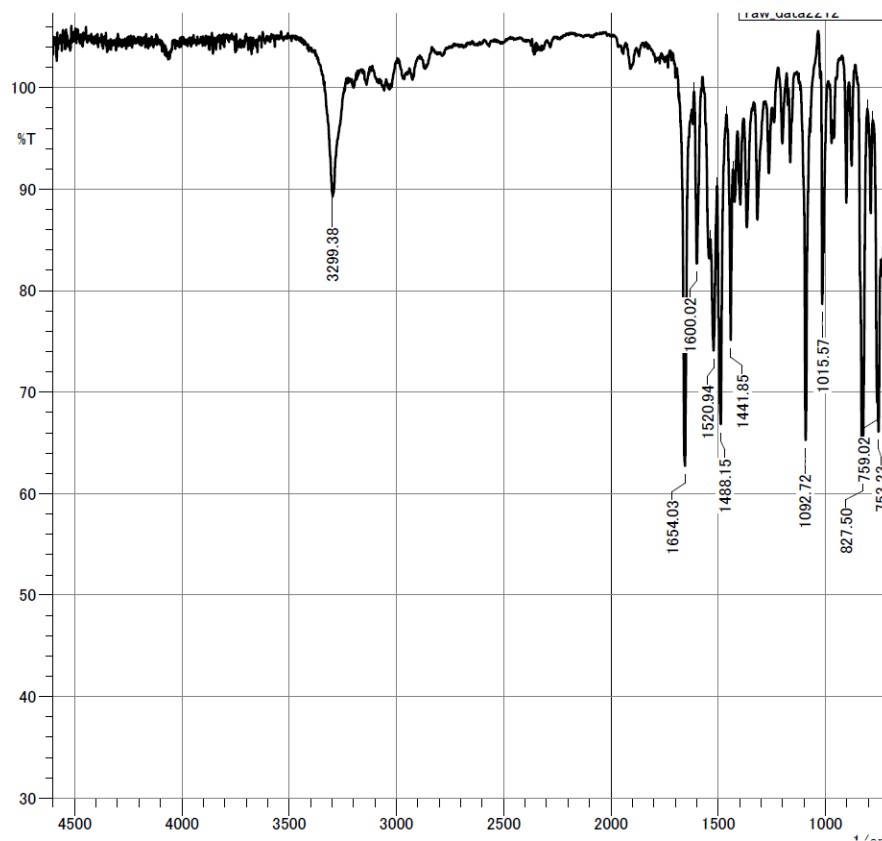

HRMS spectrum of **1e**

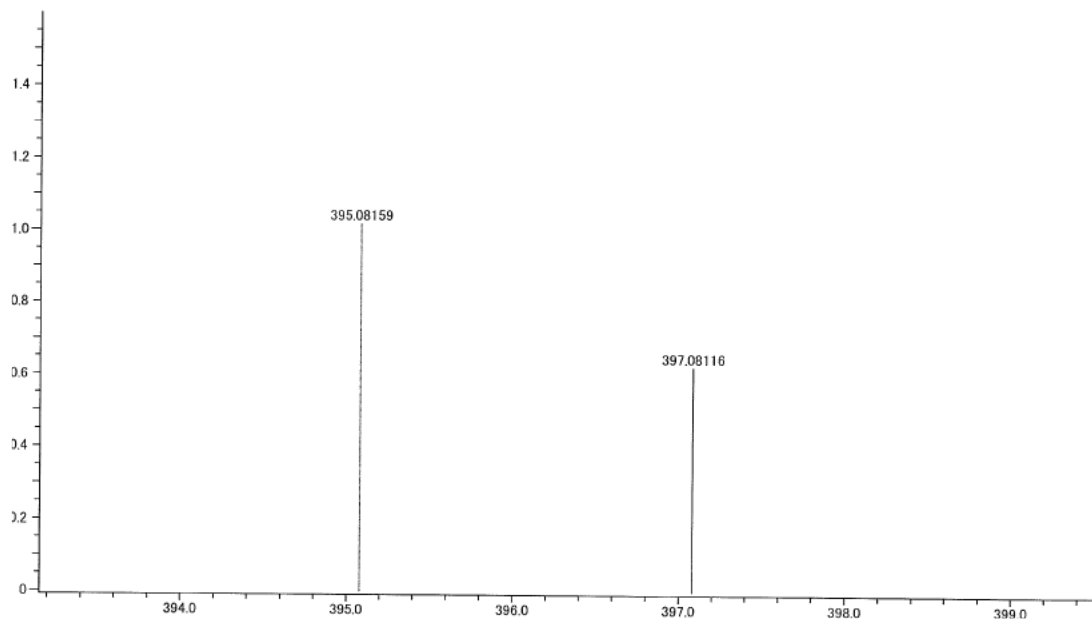



$^1\text{H}$ -NMR spectrum of **1f** ( $\text{CDCl}_3$ , 600 MHz)

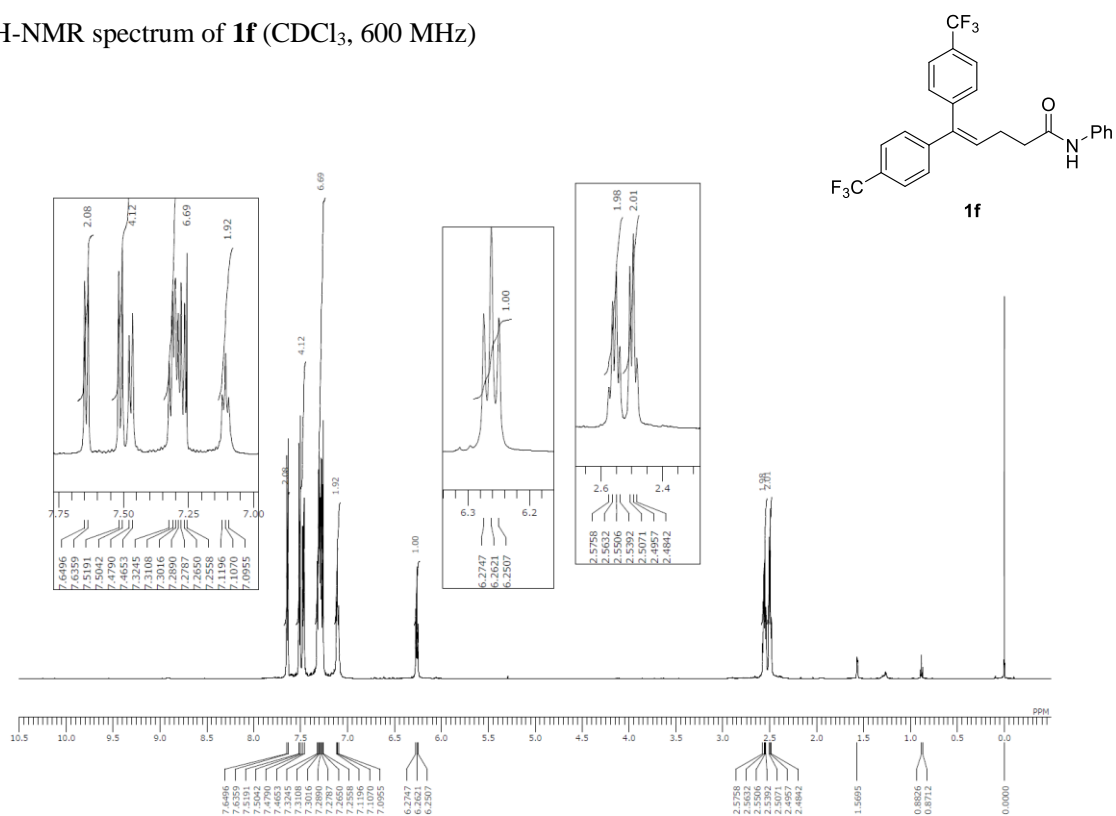

$^{13}\text{C}$ -NMR spectrum of **1f** ( $\text{CDCl}_3$ , 150 MHz)

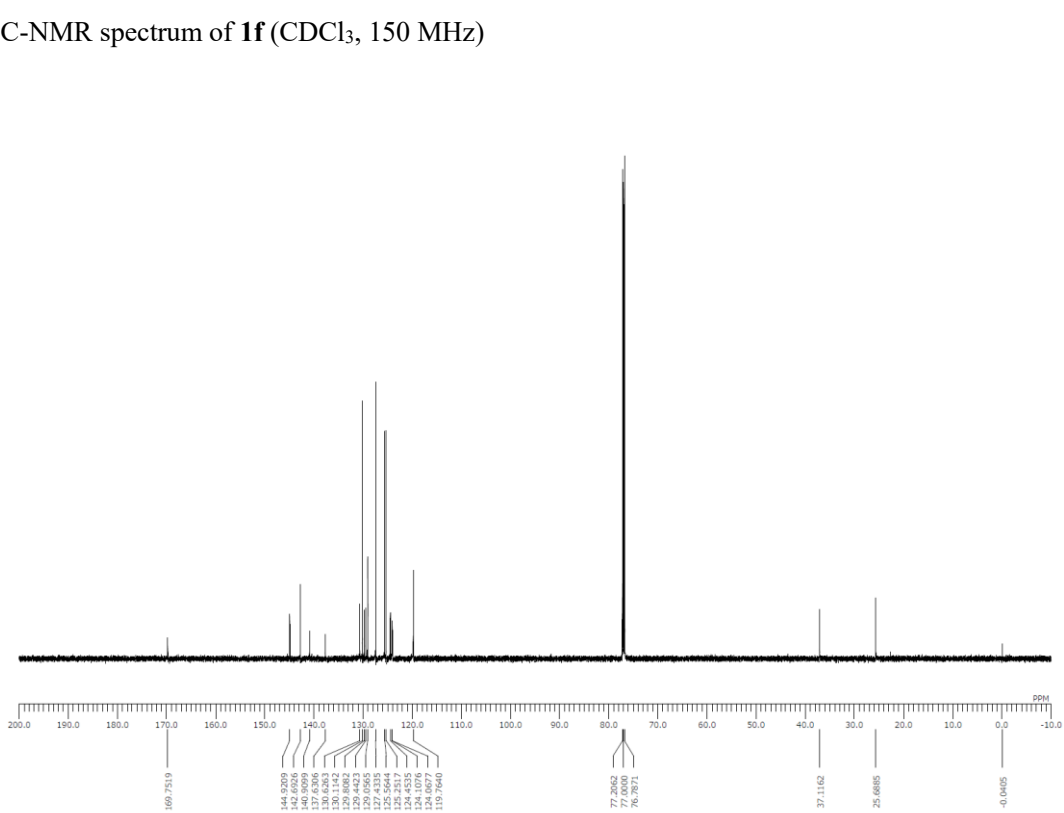

$^{19}\text{F}$ -NMR spectrum of **1f** ( $\text{CDCl}_3$ , 565 MHz)

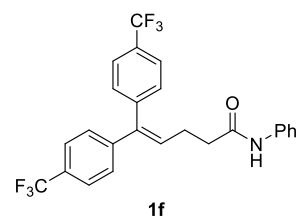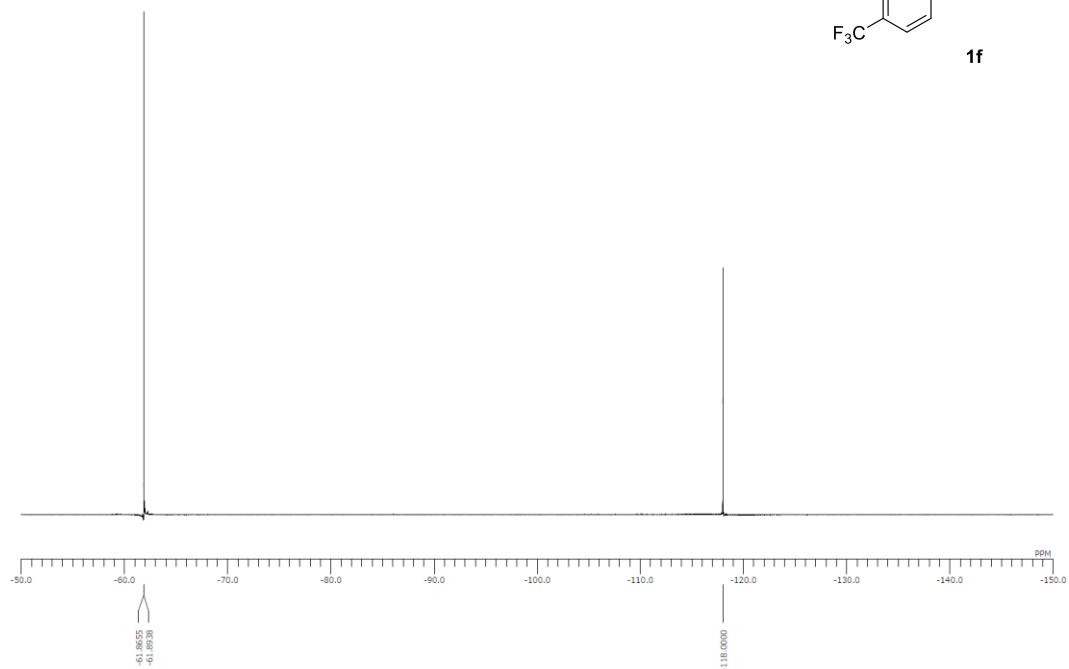

IR spectrum of **1f**

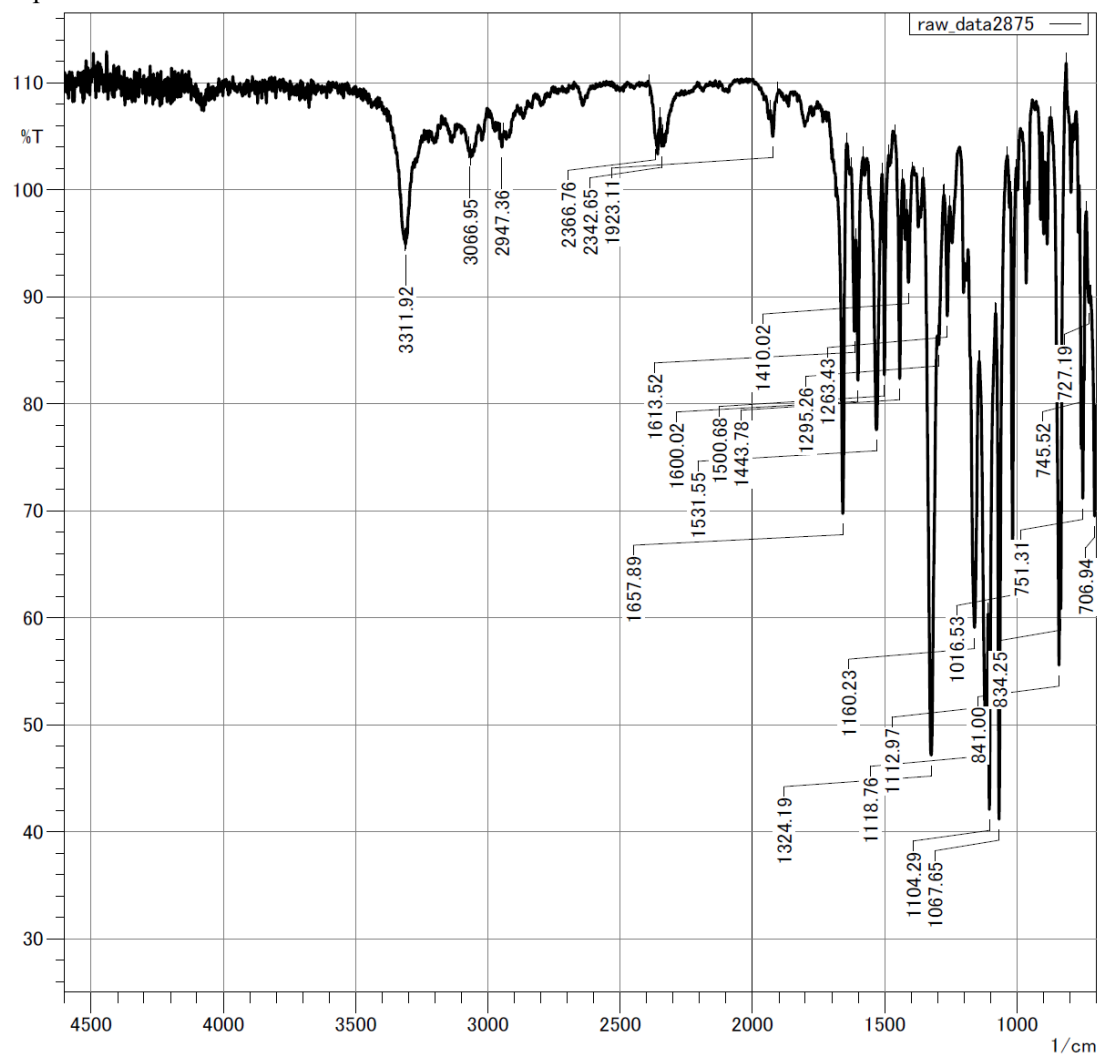

HRMS spectrum of **1f**

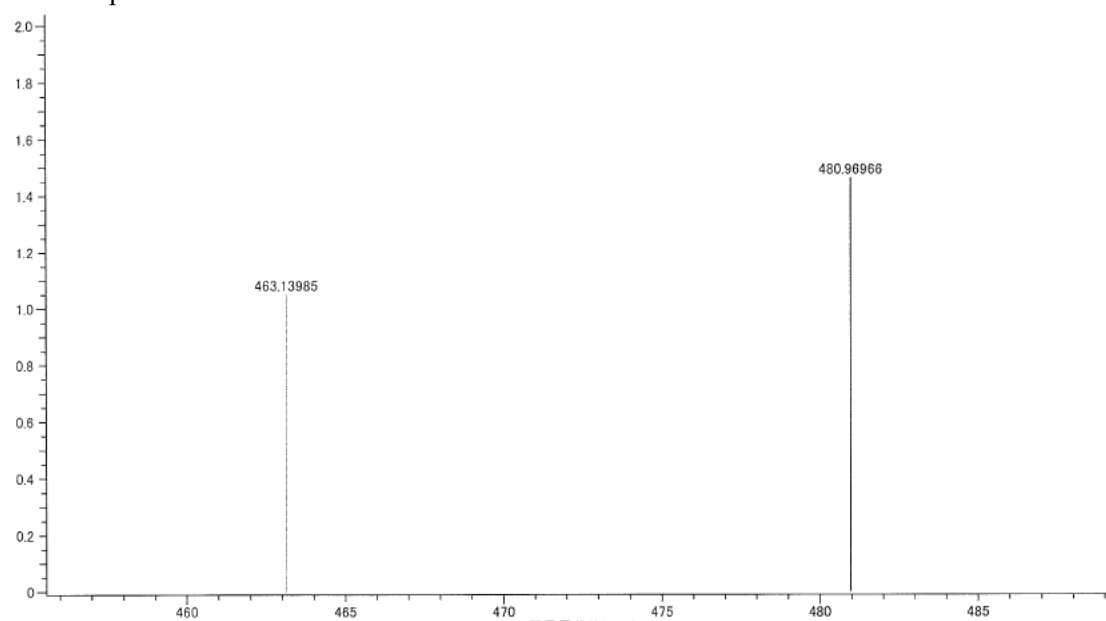

$^1\text{H}$ -NMR spectrum of **1g** ( $\text{CDCl}_3$ , 600 MHz)

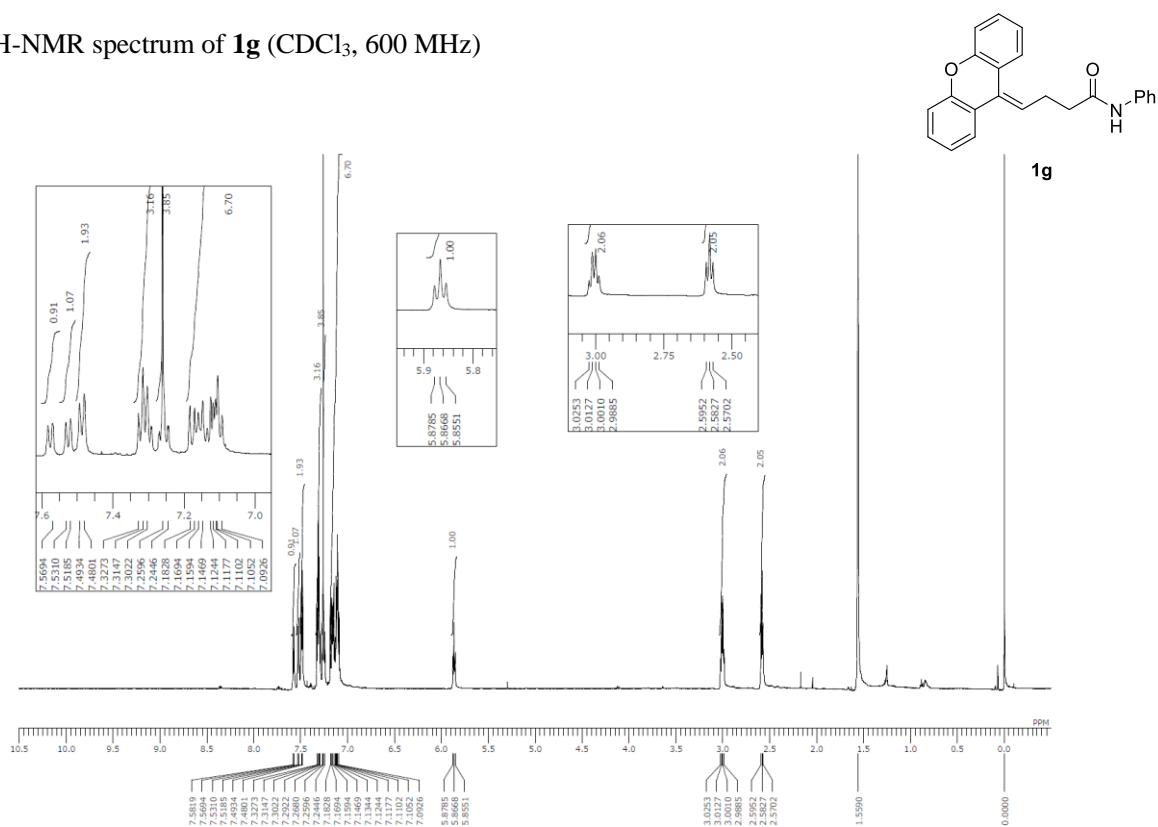

$^{13}\text{C}$ -NMR spectrum of **1g** ( $\text{CDCl}_3$ , 150 MHz)

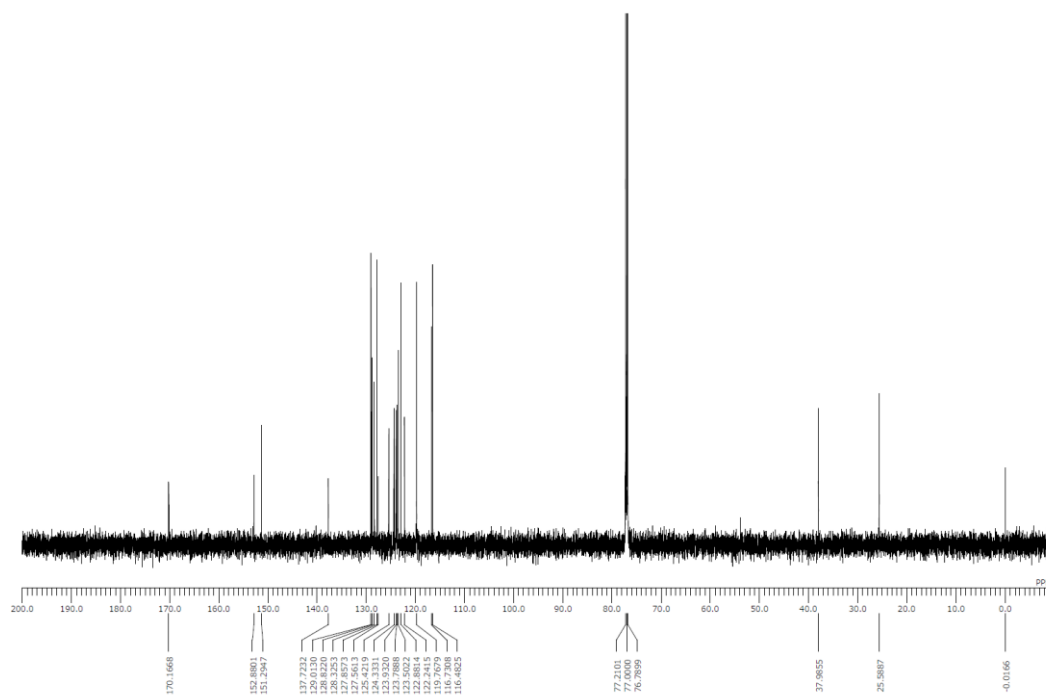

IR spectrum of **1g**

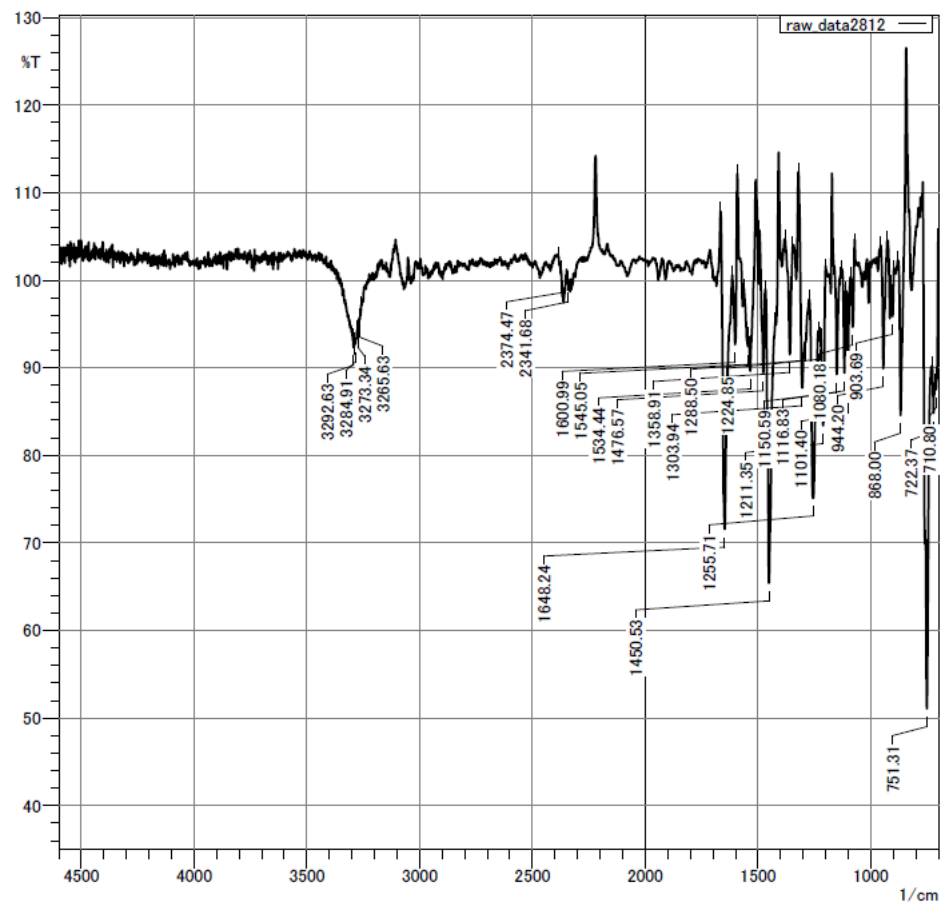

HRMS spectrum of **1g**

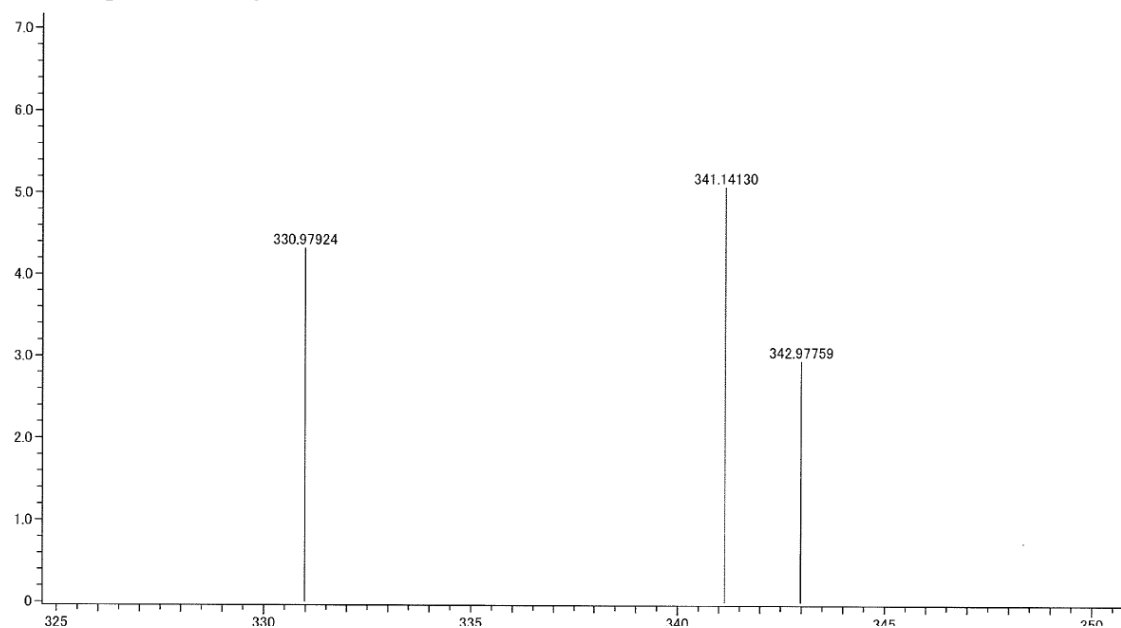

$^1\text{H}$ -NMR spectrum of **1h** ( $\text{CDCl}_3$ , 600 MHz)

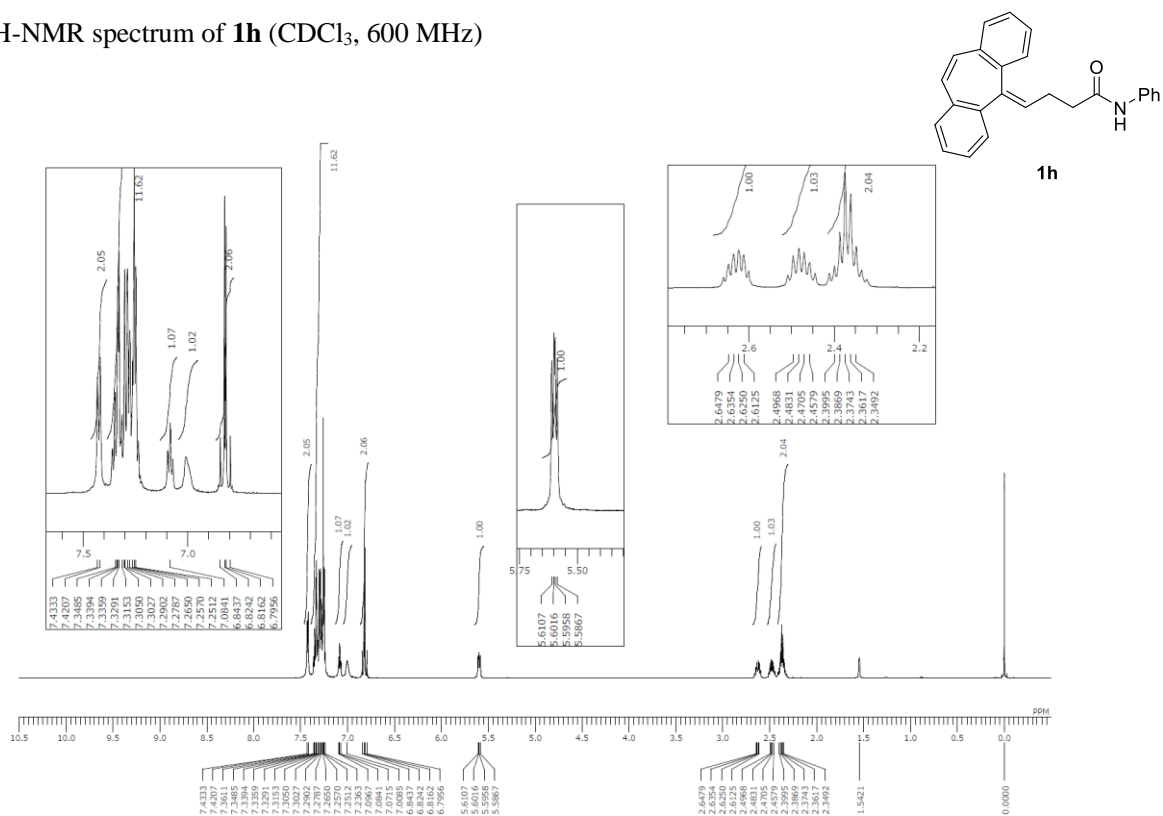

$^{13}\text{C}$ -NMR spectrum of **1h** ( $\text{CDCl}_3$ , 150 MHz)

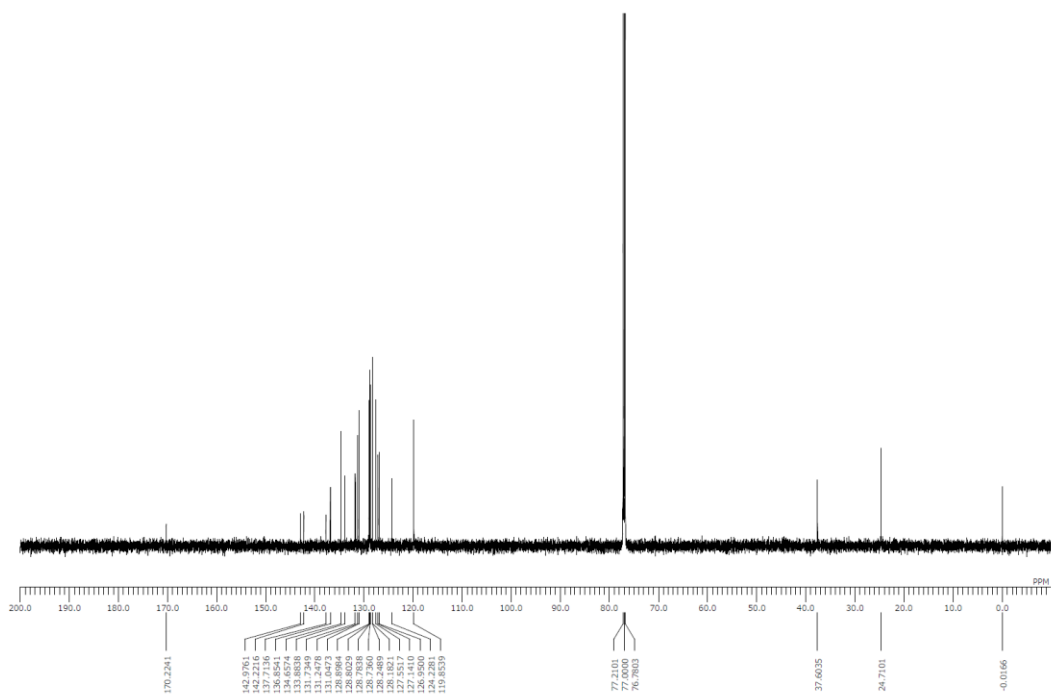

IR spectrum of **1h**

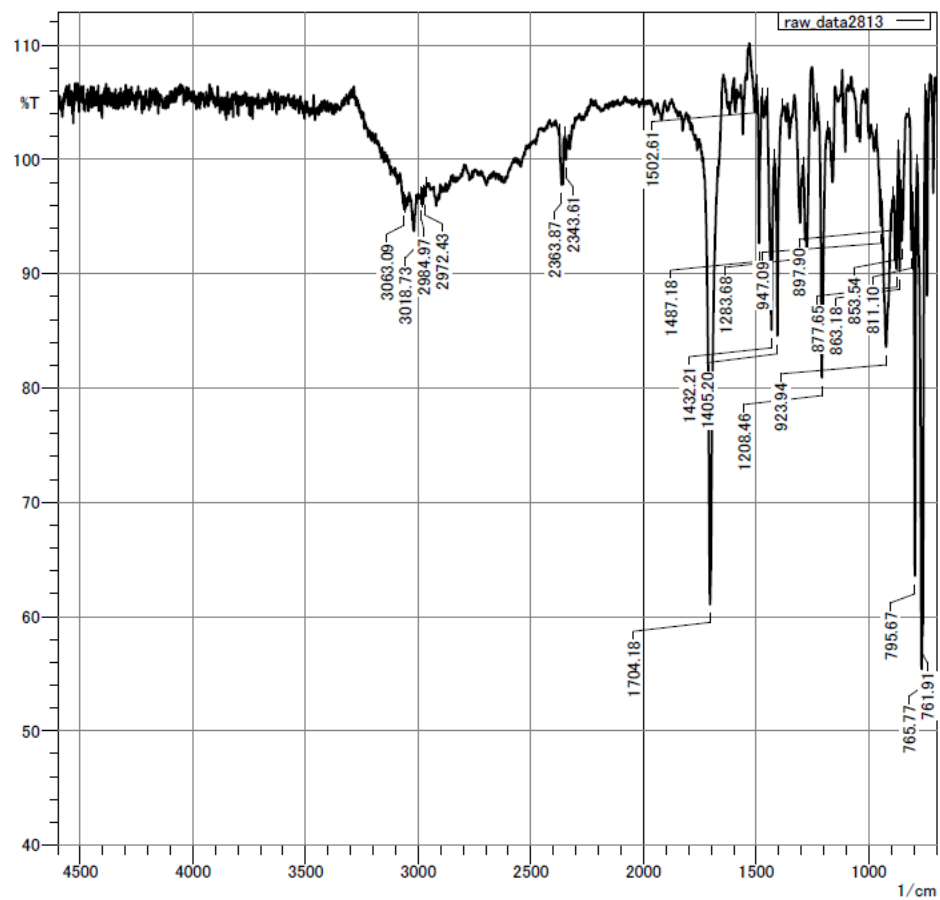

HRMS spectrum of **1h**

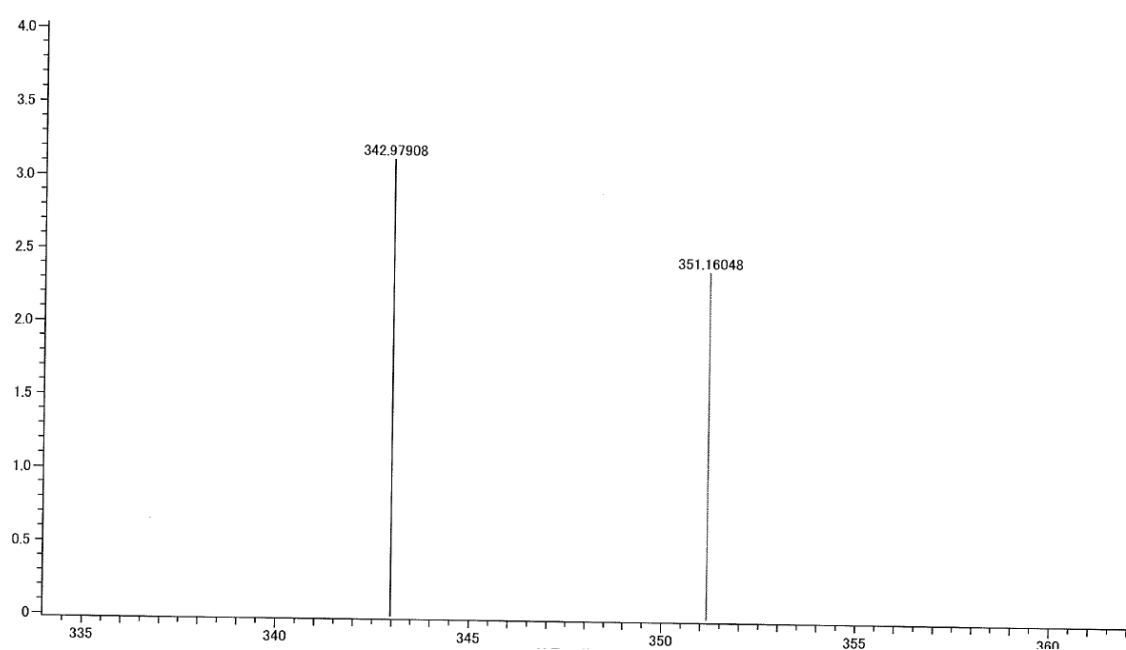

$^1\text{H}$ -NMR spectrum of **1i** ( $\text{CDCl}_3$ , 600 MHz)

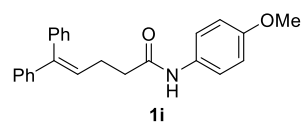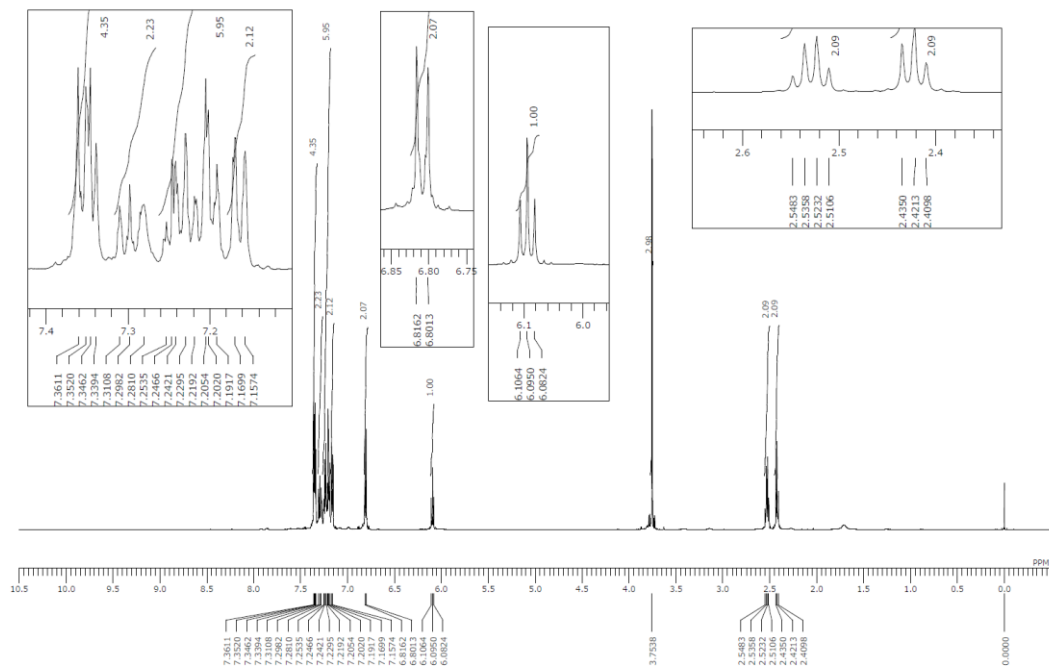

$^{13}\text{C}$ -NMR spectrum of **1i** ( $\text{CDCl}_3$ , 150 MHz)

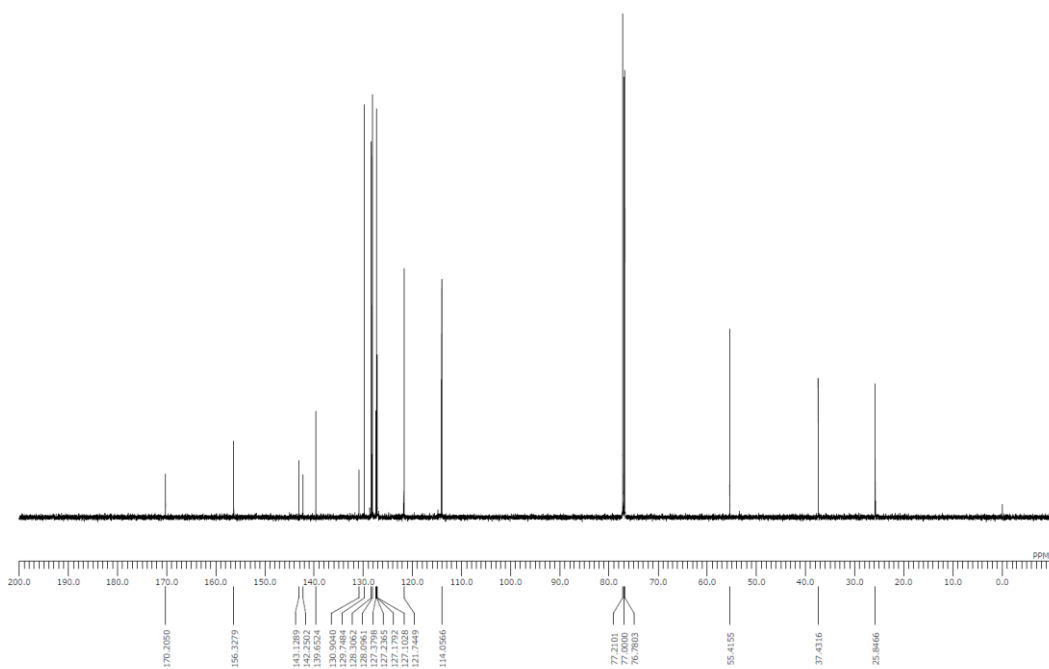



IR spectrum of **1i**

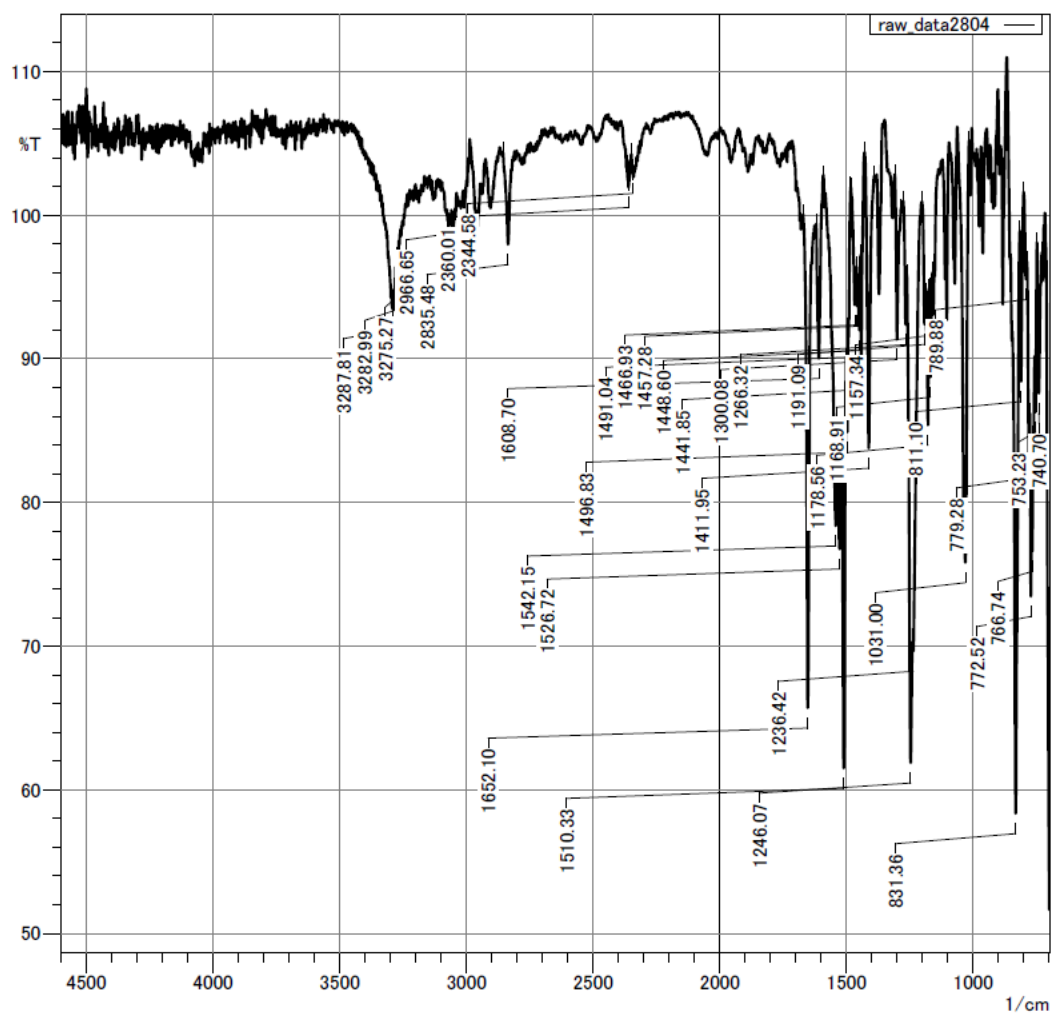

HRMS spectrum of **1i**

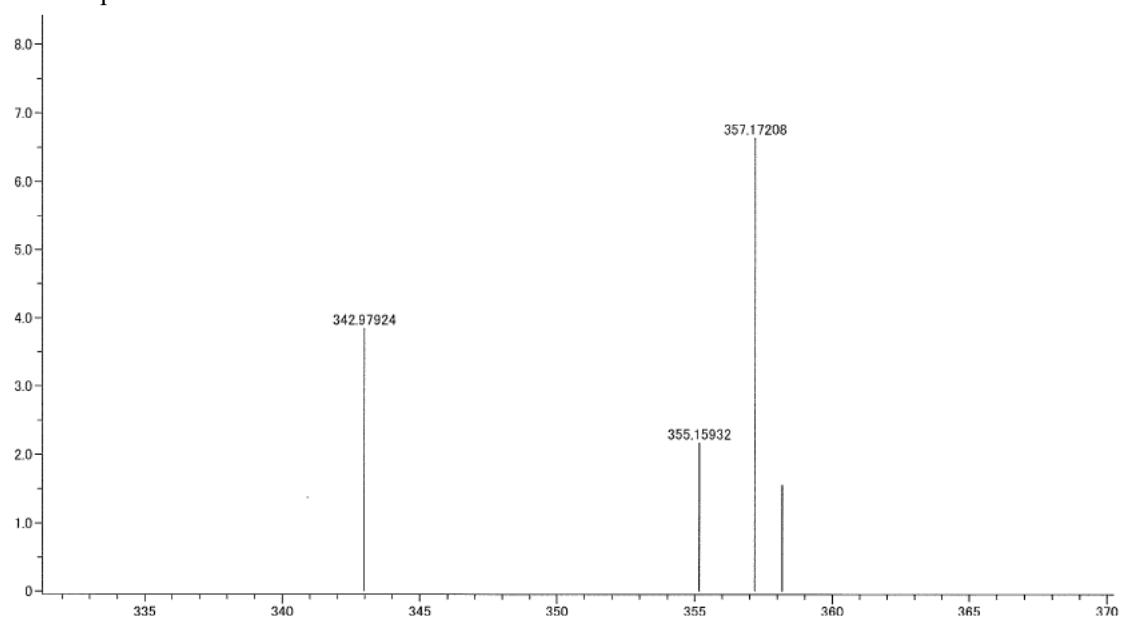

$^1\text{H}$ -NMR spectrum of **1j** ( $\text{CDCl}_3$ , 600 MHz)

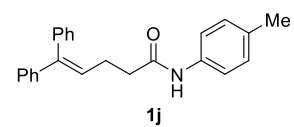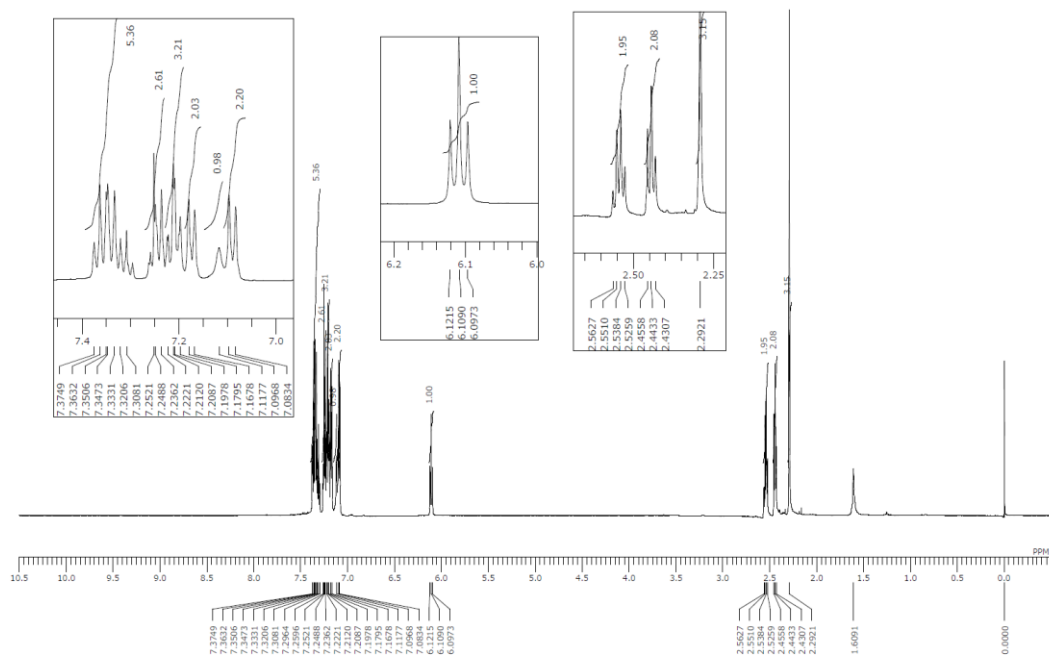

$^{13}\text{C}$ -NMR spectrum of **1j** ( $\text{CDCl}_3$ , 150 MHz)

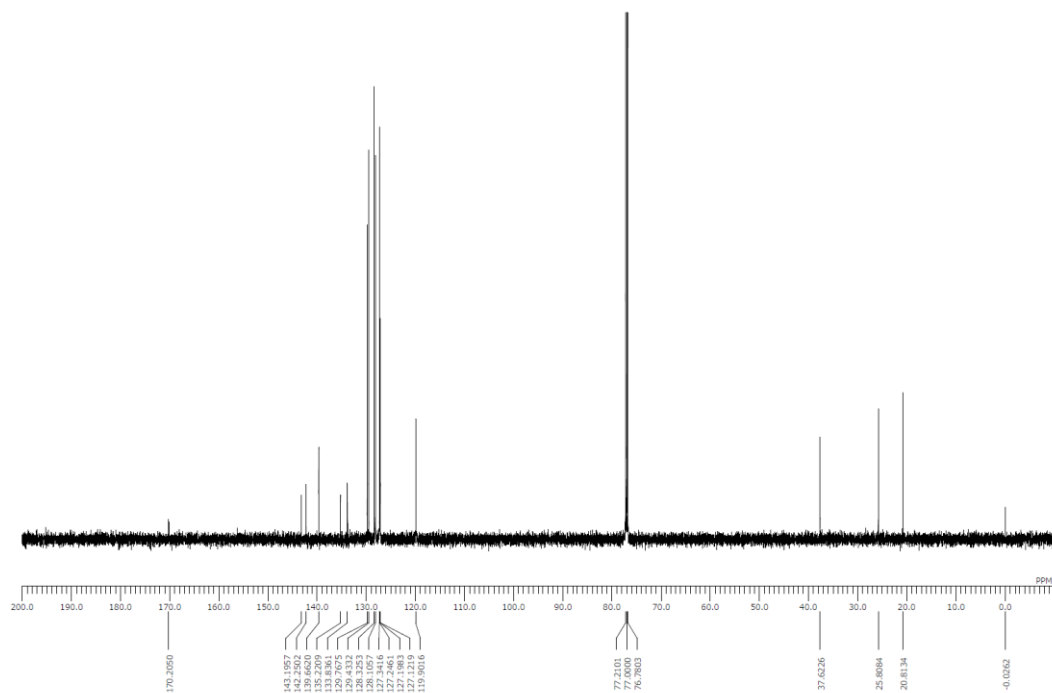

IR spectrum of **1j**

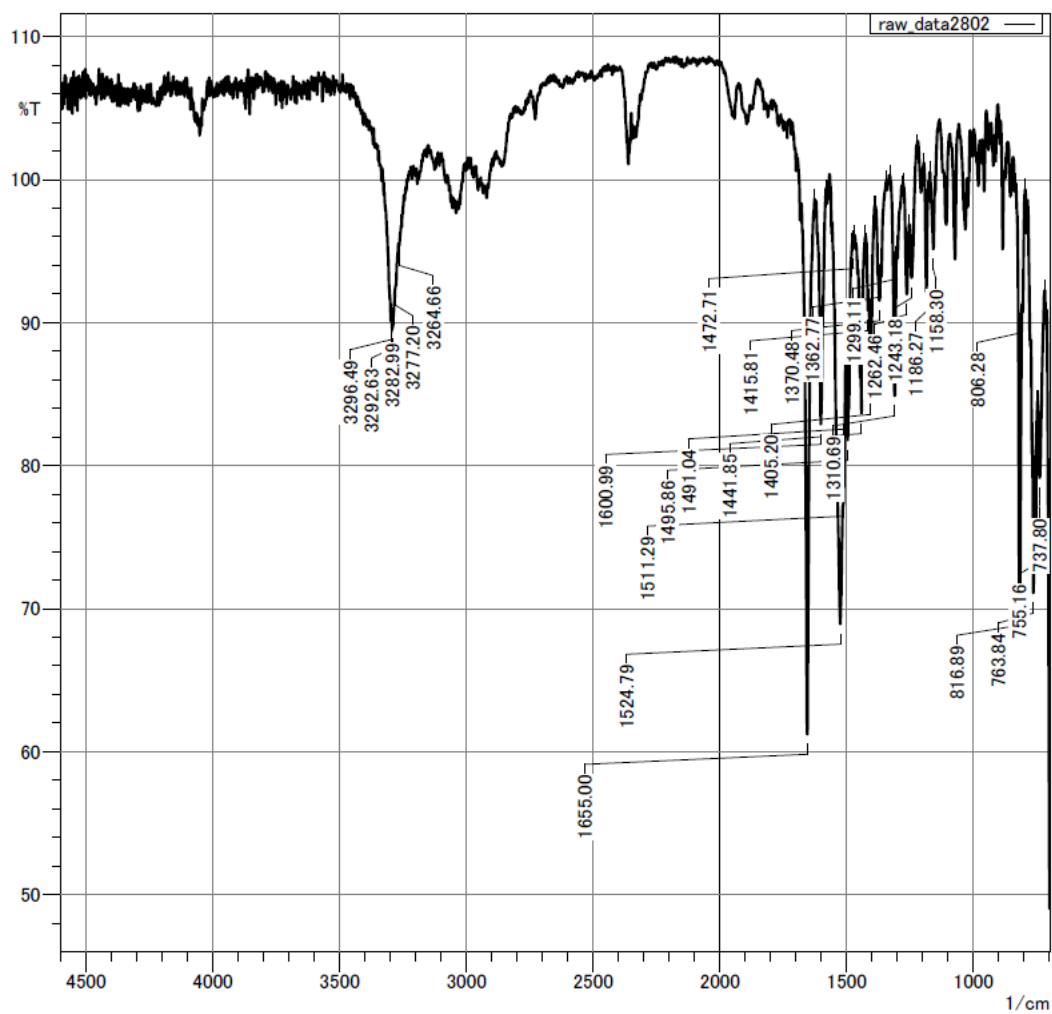

HRMS spectrum of **1j**

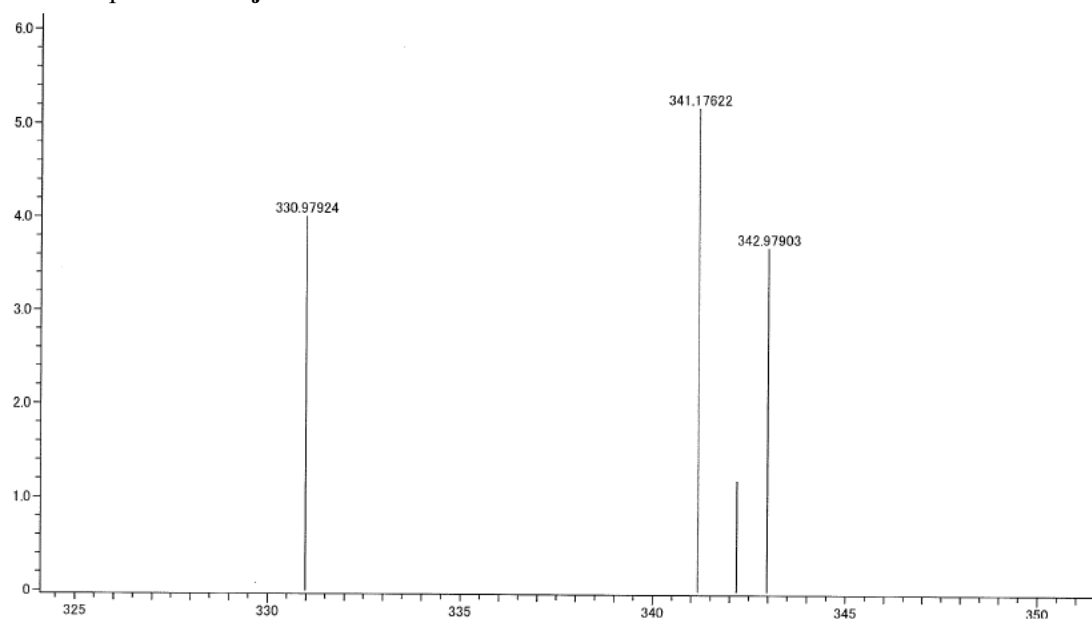

$^1\text{H}$ -NMR spectrum of **1k** ( $\text{CDCl}_3$ , 600 MHz)

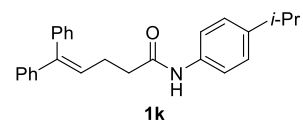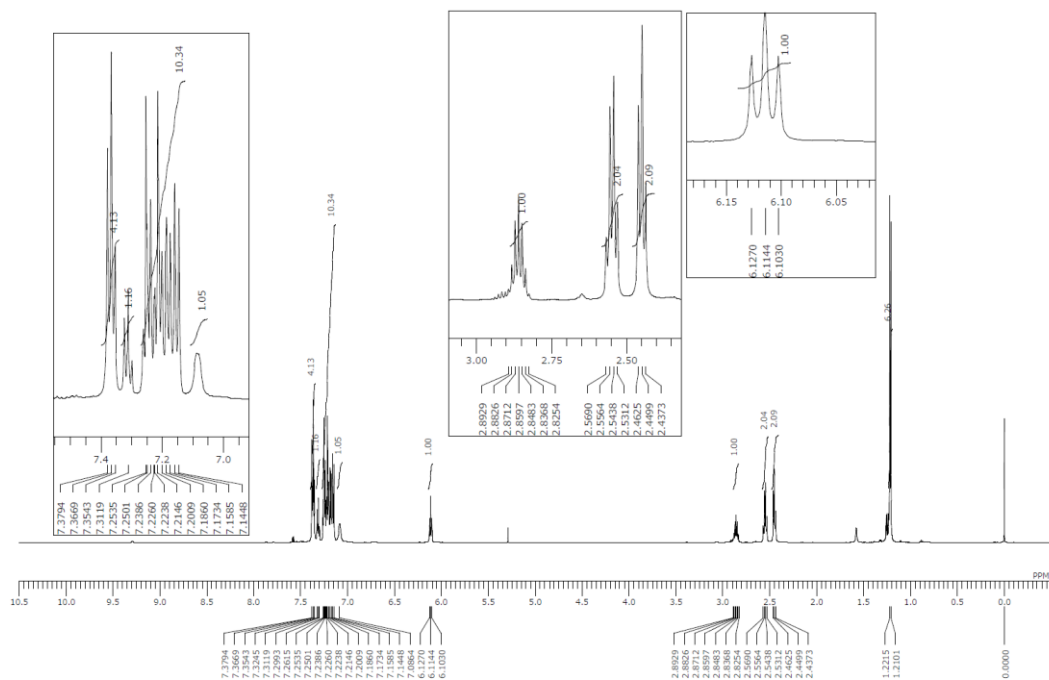

$^{13}\text{C}$ -NMR spectrum of **1k** ( $\text{CDCl}_3$ , 150 MHz)

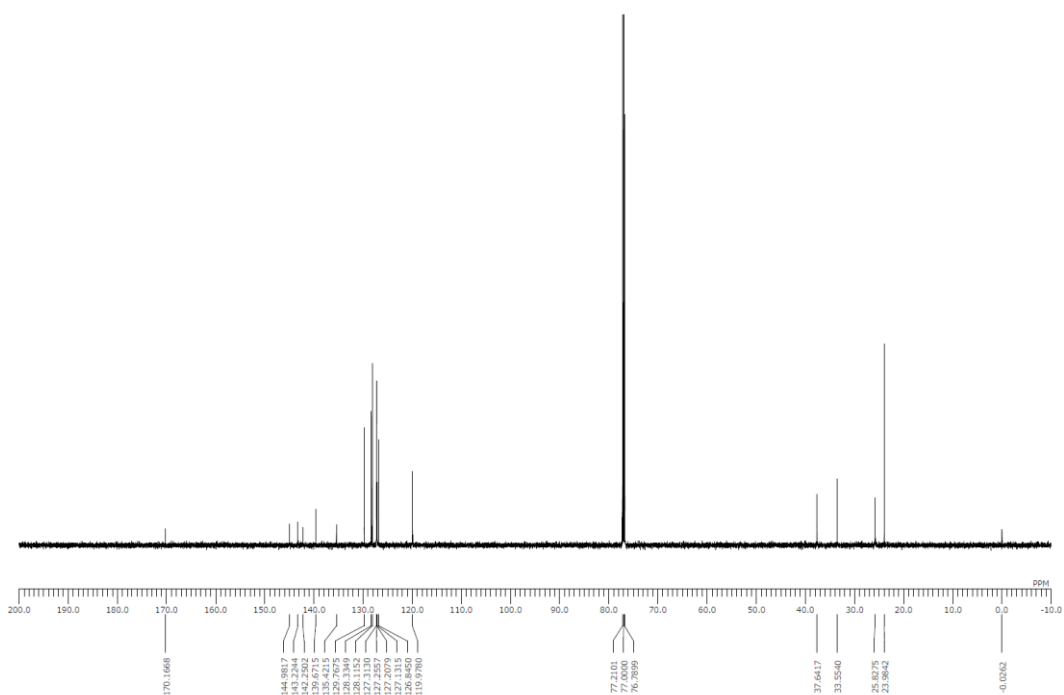

IR spectrum of **1k**

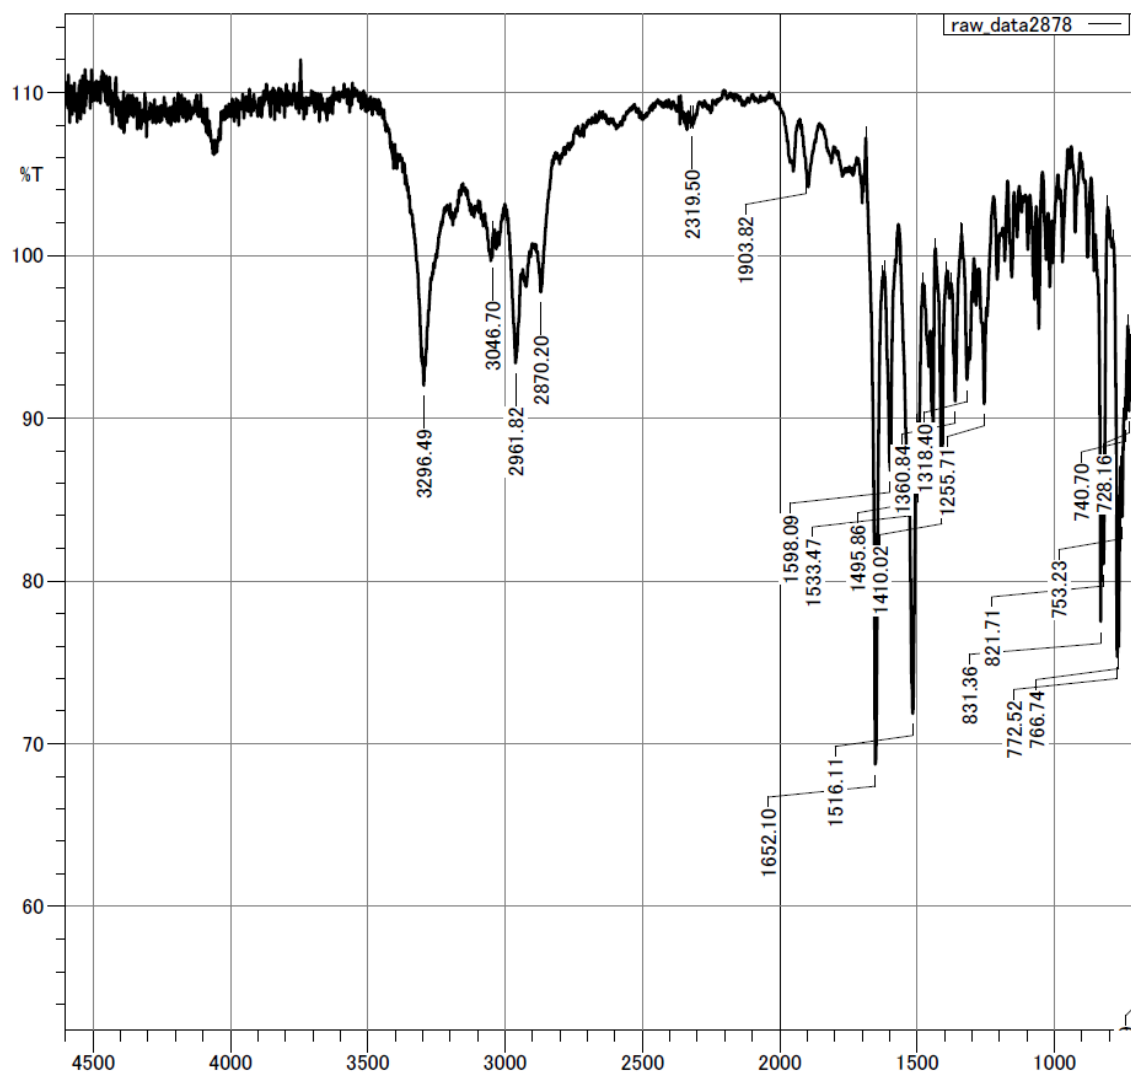

HRMS spectrum of **1k**

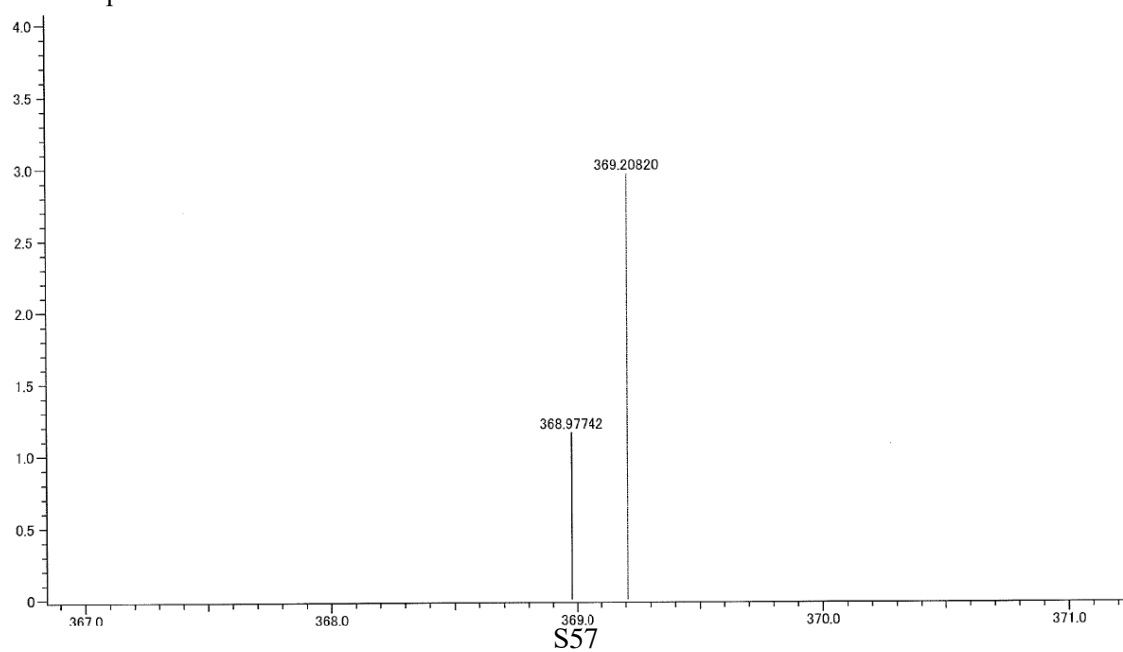

$^1\text{H}$ -NMR spectrum of **11** ( $\text{CDCl}_3$ , 600 MHz)

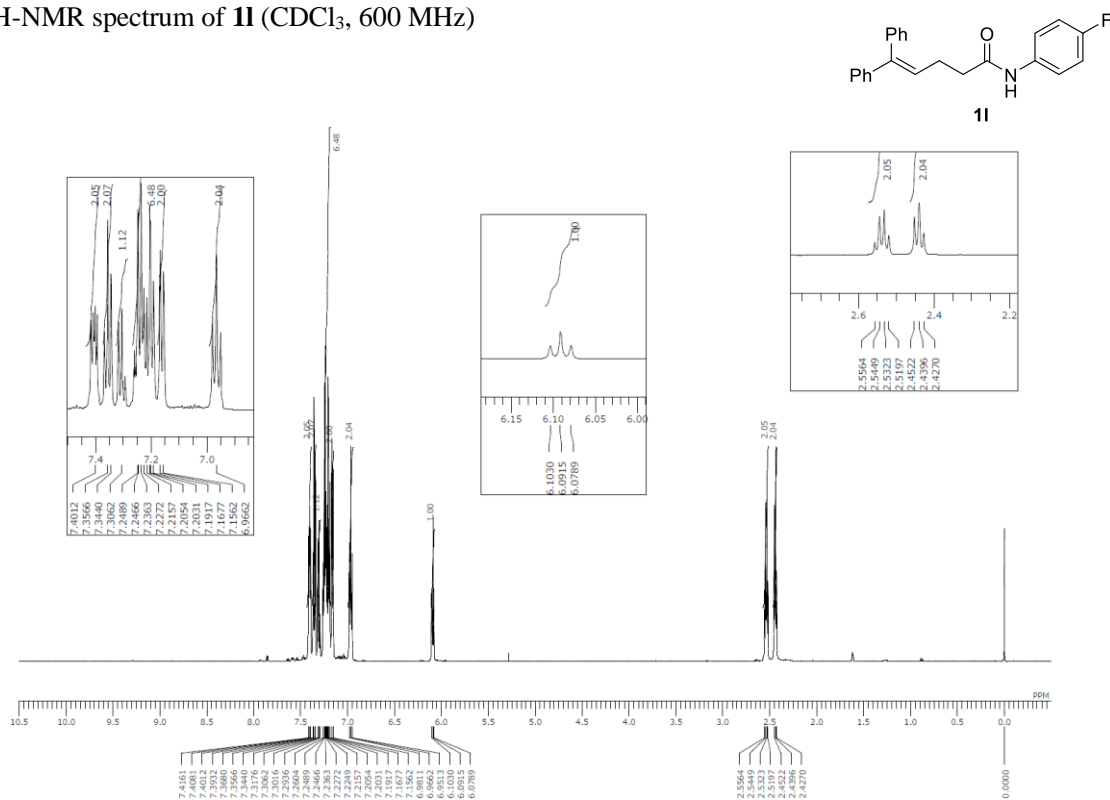

$^{13}\text{C}$ -NMR spectrum of **11** ( $\text{CDCl}_3$ , 150 MHz)

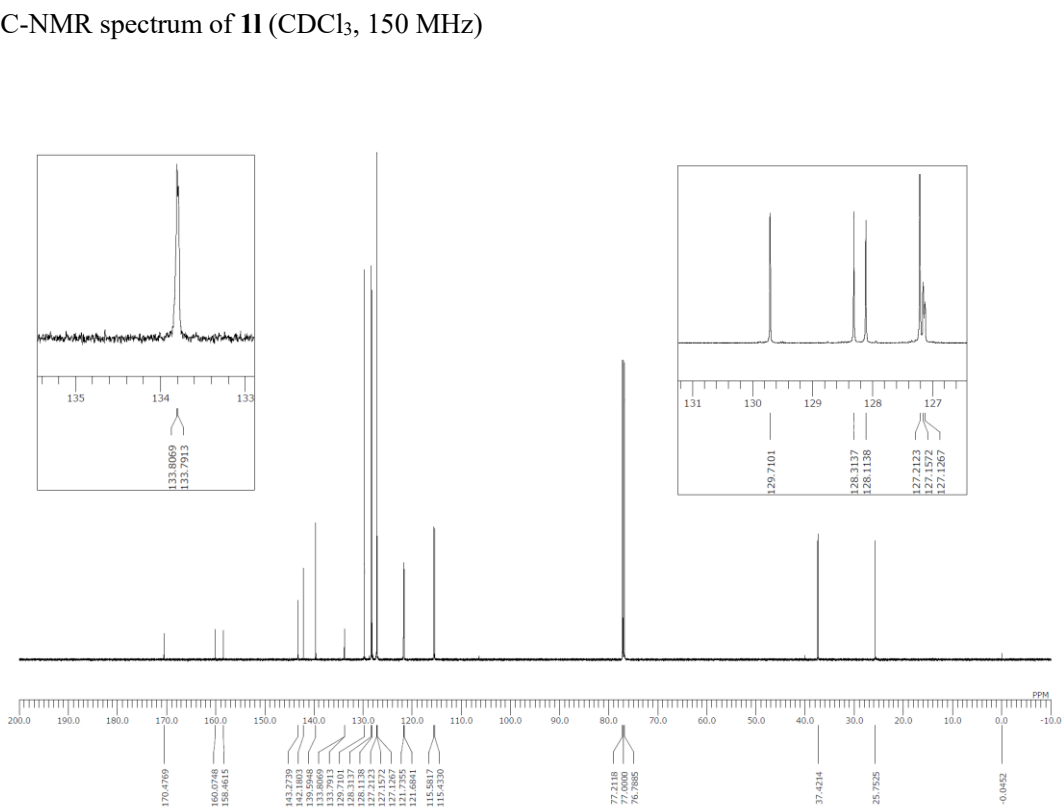

$^{19}\text{F}$ -NMR spectrum of **1l** ( $\text{CDCl}_3$ , 565 MHz)

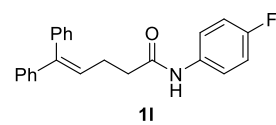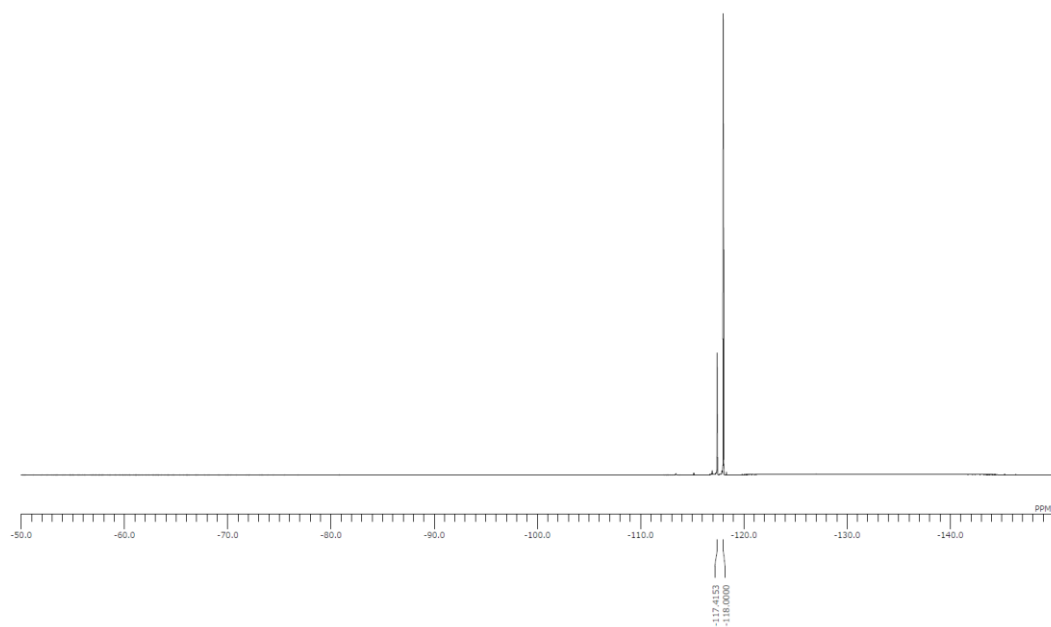

IR spectrum of **11**

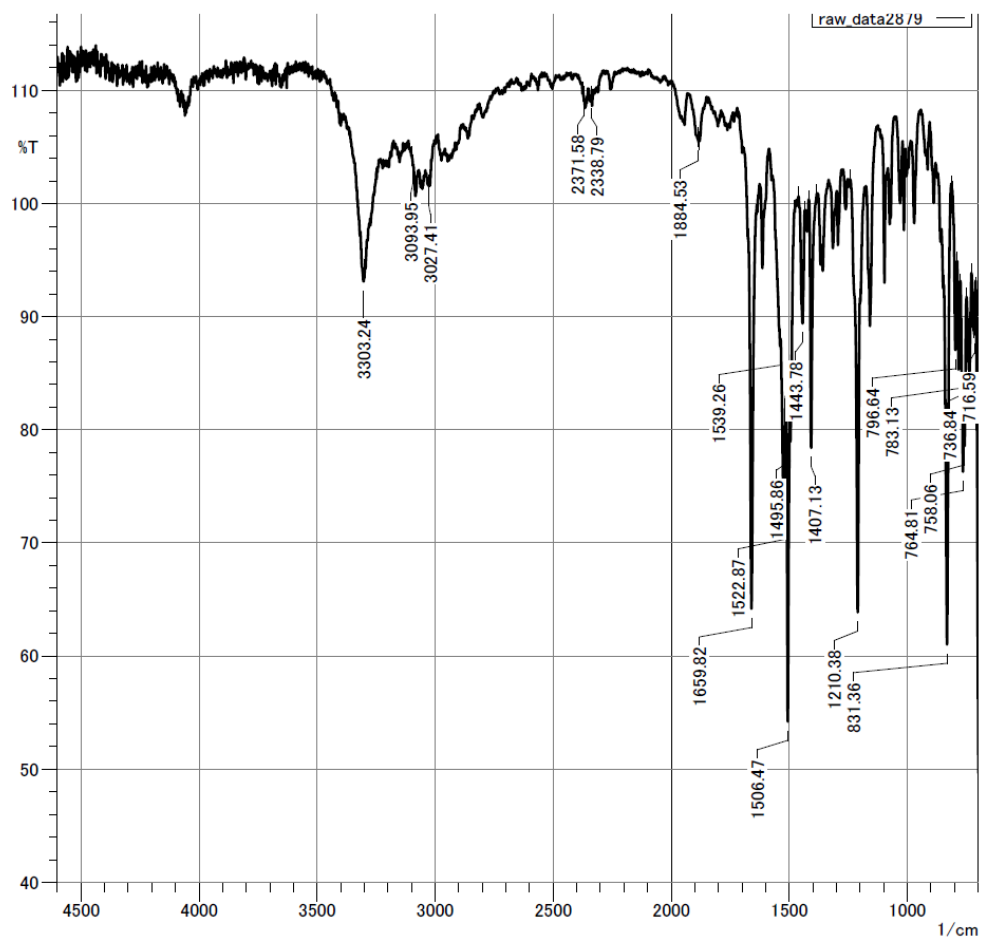

HRMS spectrum of **11**

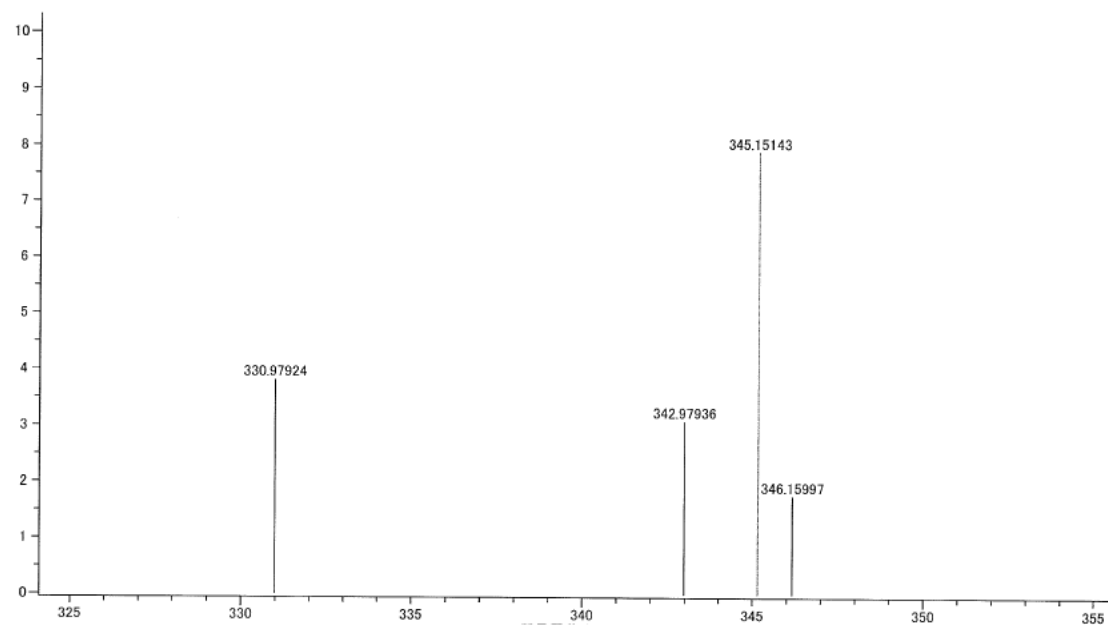



$^1\text{H}$ -NMR spectrum of **1m** ( $\text{CDCl}_3$ , 600 MHz)

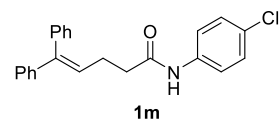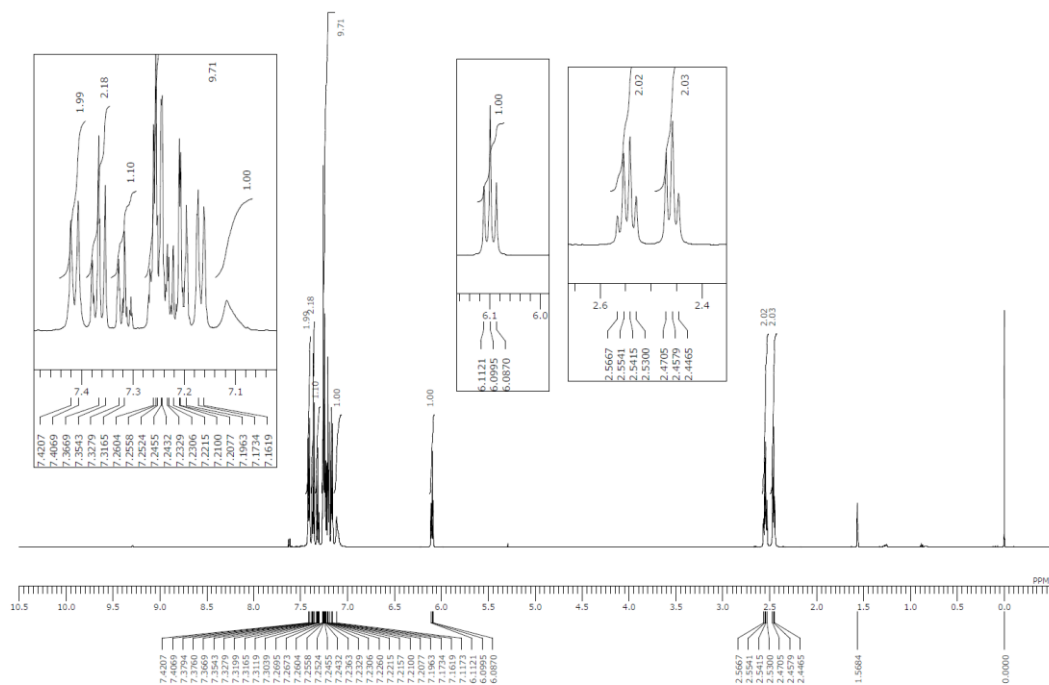

$^{13}\text{C}$ -NMR spectrum of **1m** ( $\text{CDCl}_3$ , 150 MHz)

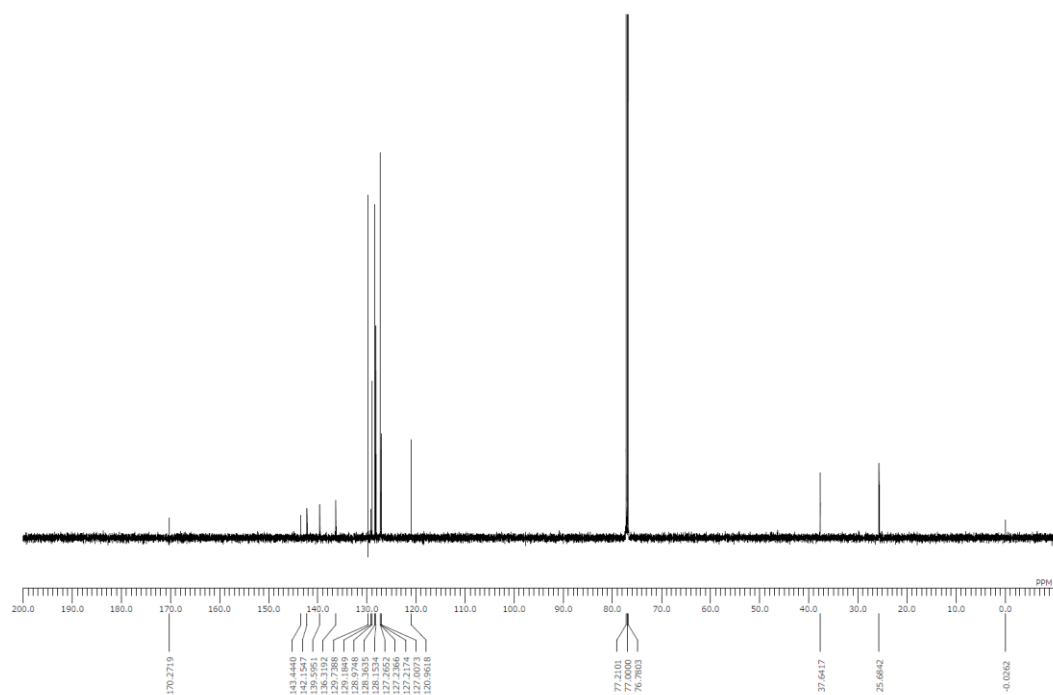

IR spectrum of **1m**

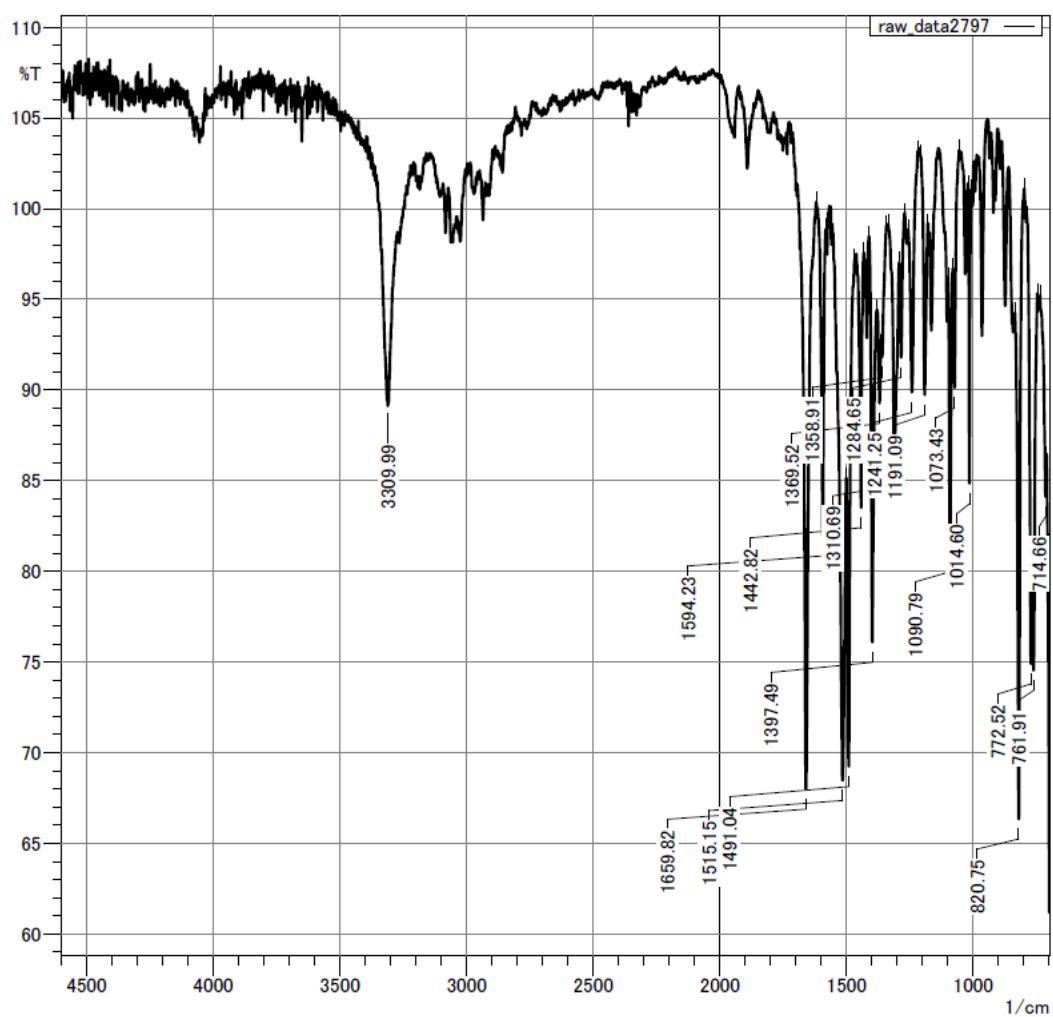

HRMS spectrum of **1m**

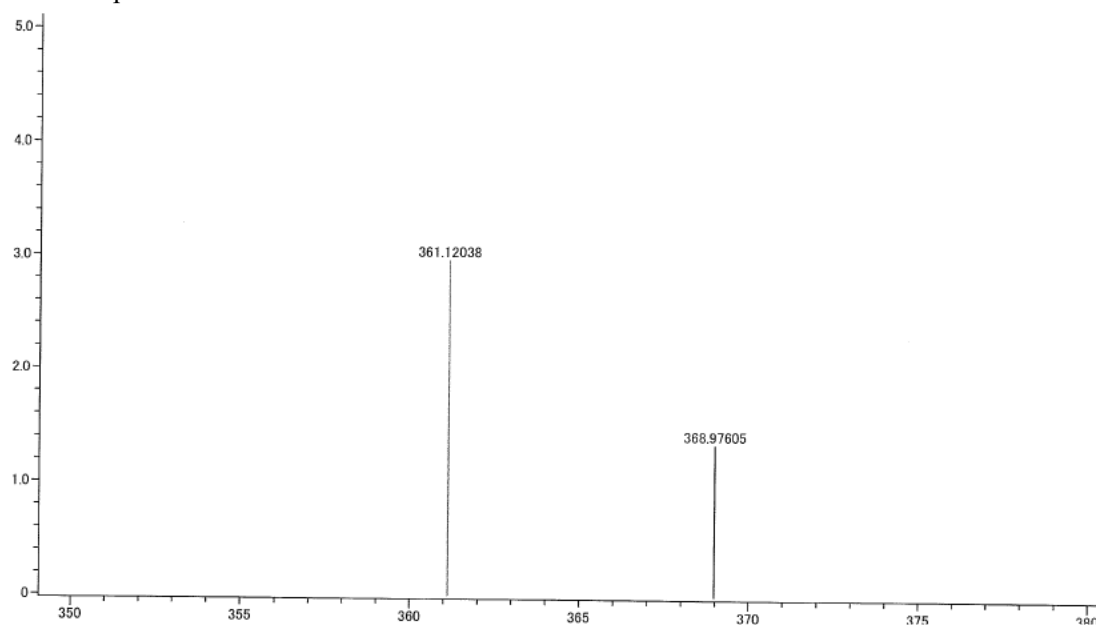

$^1\text{H}$ -NMR spectrum of **1n** ( $\text{CDCl}_3$ , 600 MHz)

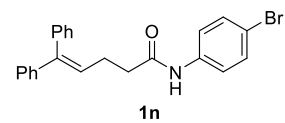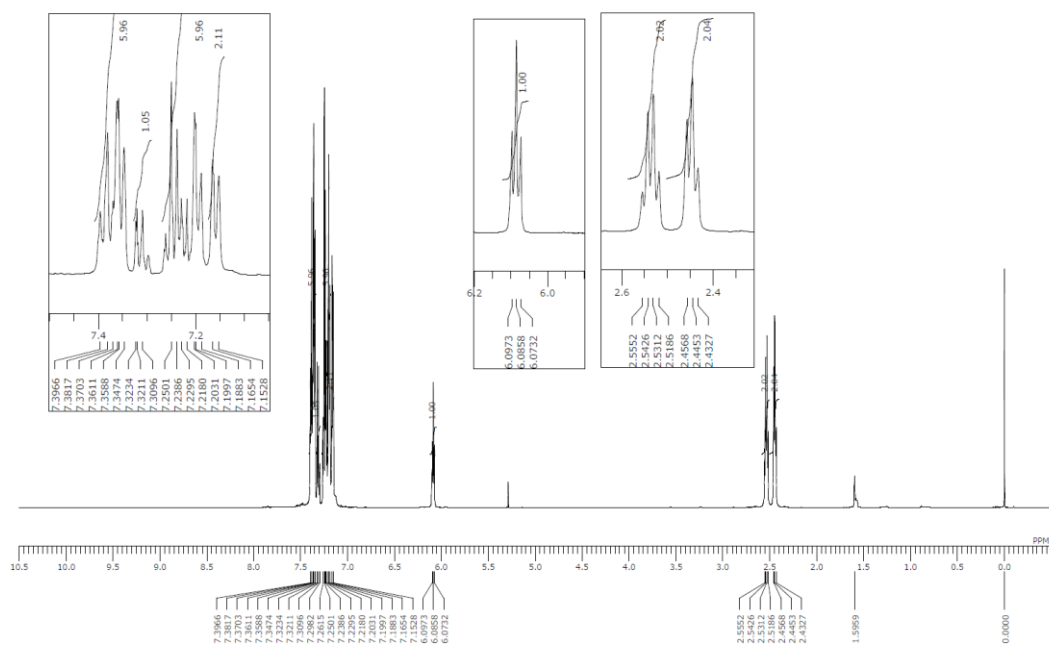

$^{13}\text{C}$ -NMR spectrum of **1n** ( $\text{CDCl}_3$ , 150 MHz)

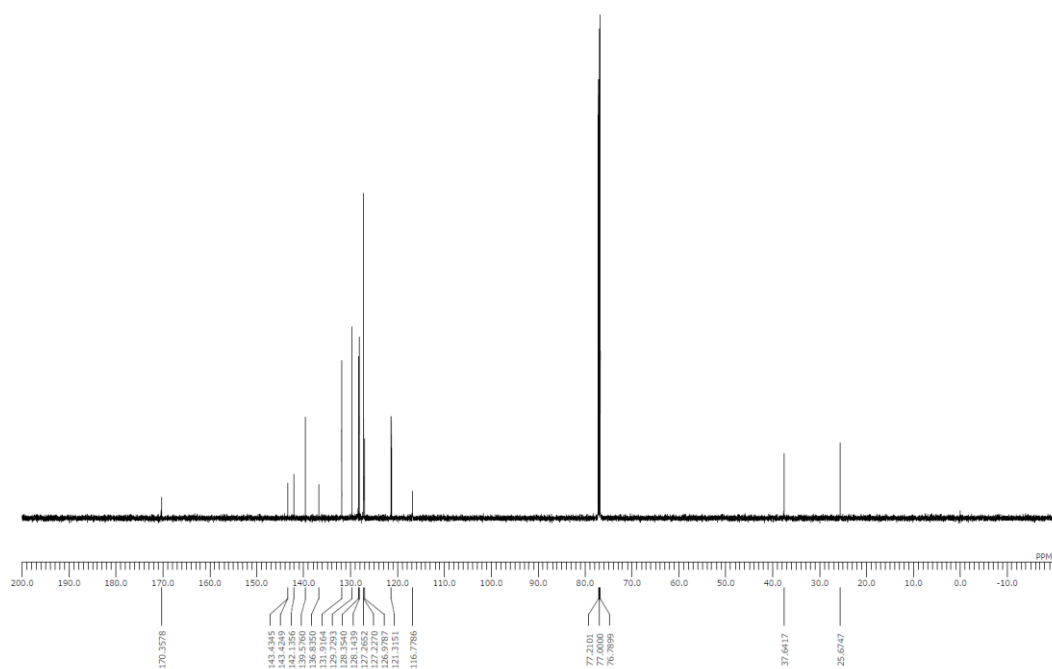

IR spectrum of **1n**

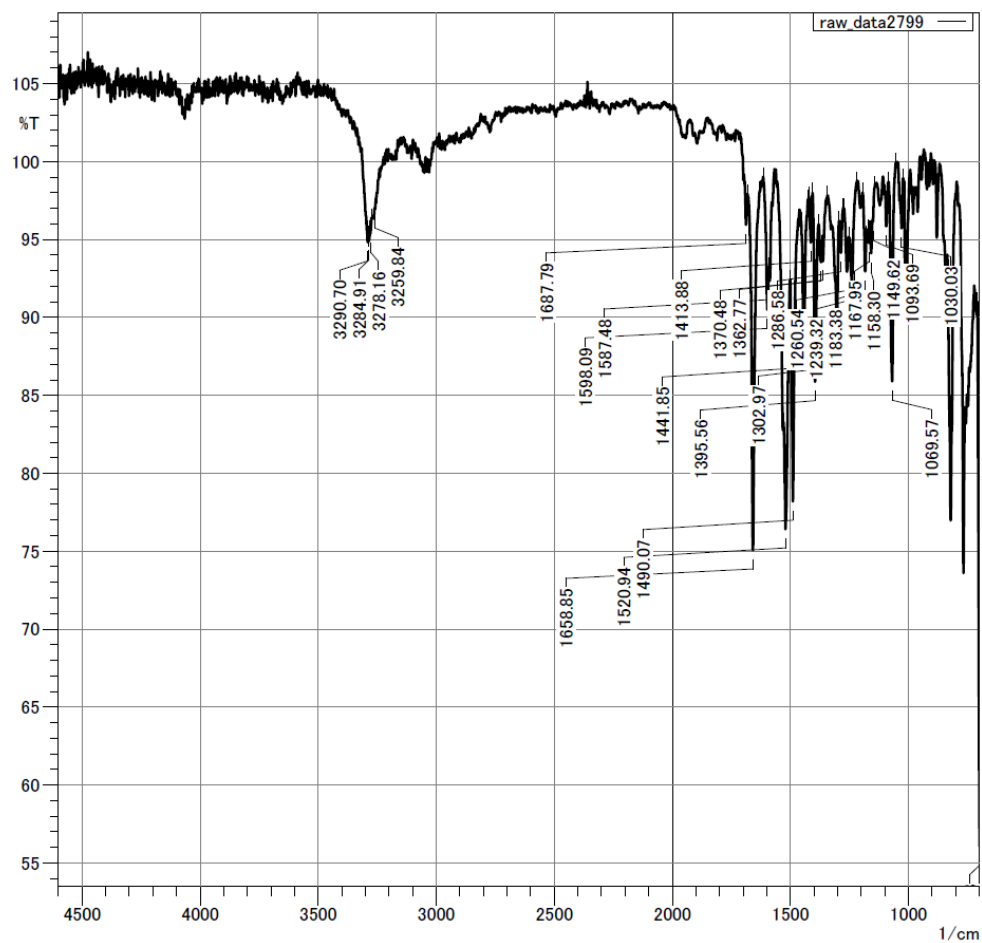

HRMS spectrum of **1n**

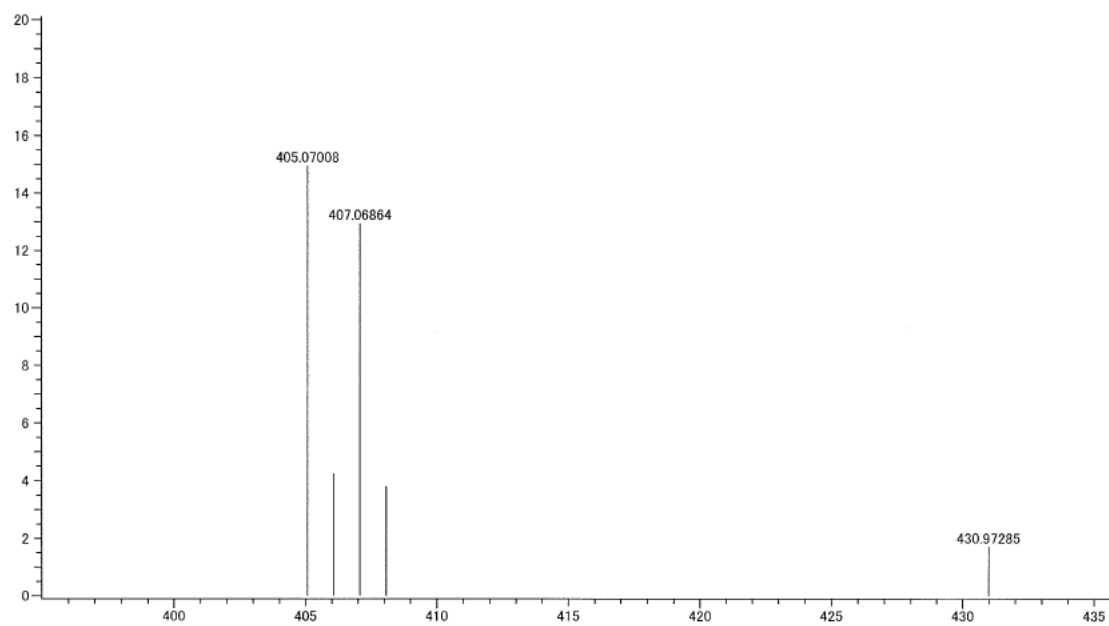

**1o**

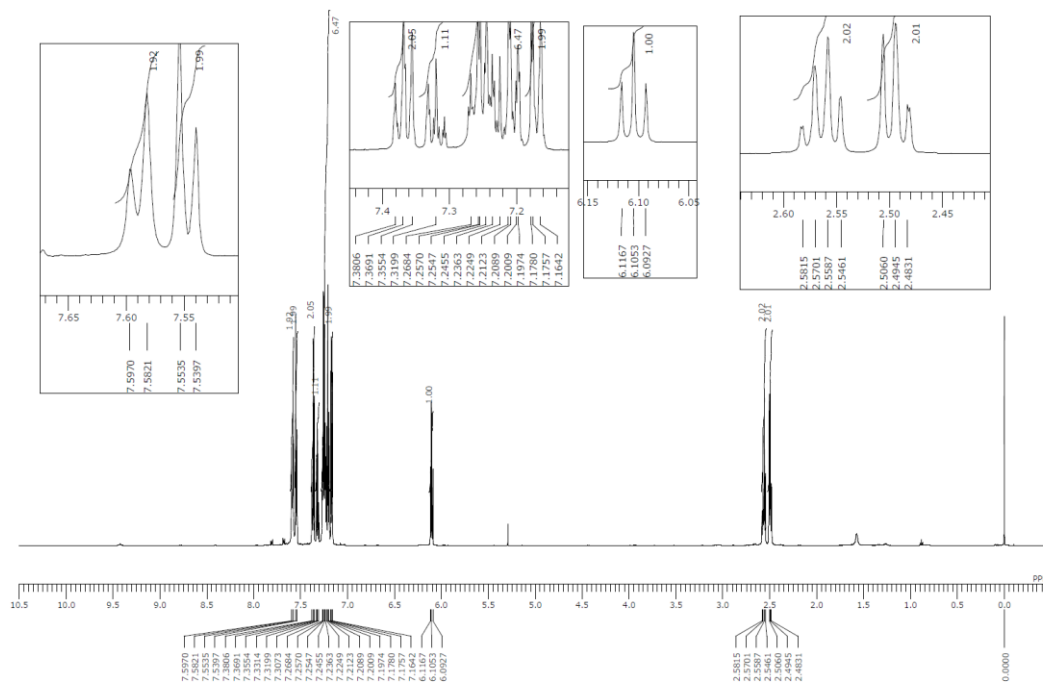

170.6564

143.5706  
142.1072  
141.5653  
139.5663  
139.7017  
138.1519  
137.2938  
137.2206  
136.8490  
136.3090  
128.9844  
125.9834  
125.5845  
119.3117

77.2062  
77.0000  
76.7671

37.6149

25.6153

$^{19}\text{F}$ -NMR spectrum of **1o** ( $\text{CDCl}_3$ , 565 MHz)

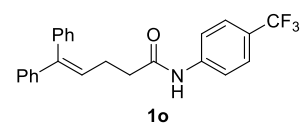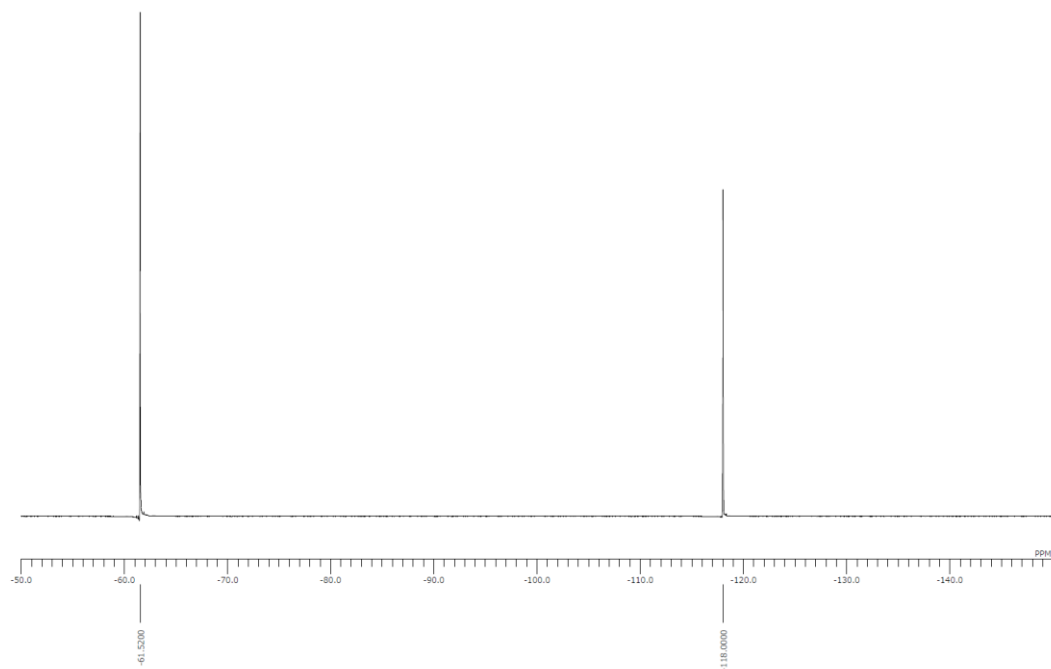

IR spectrum of **1o**

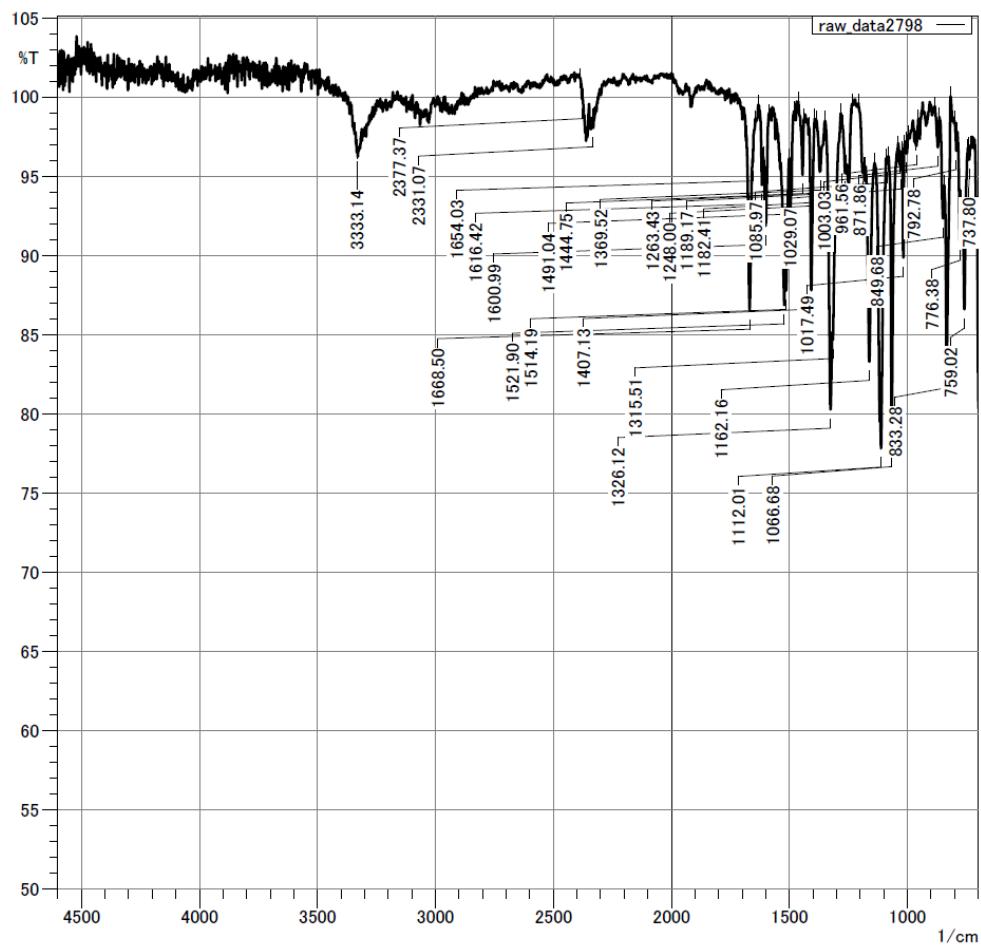

HRMS spectrum of **1o**

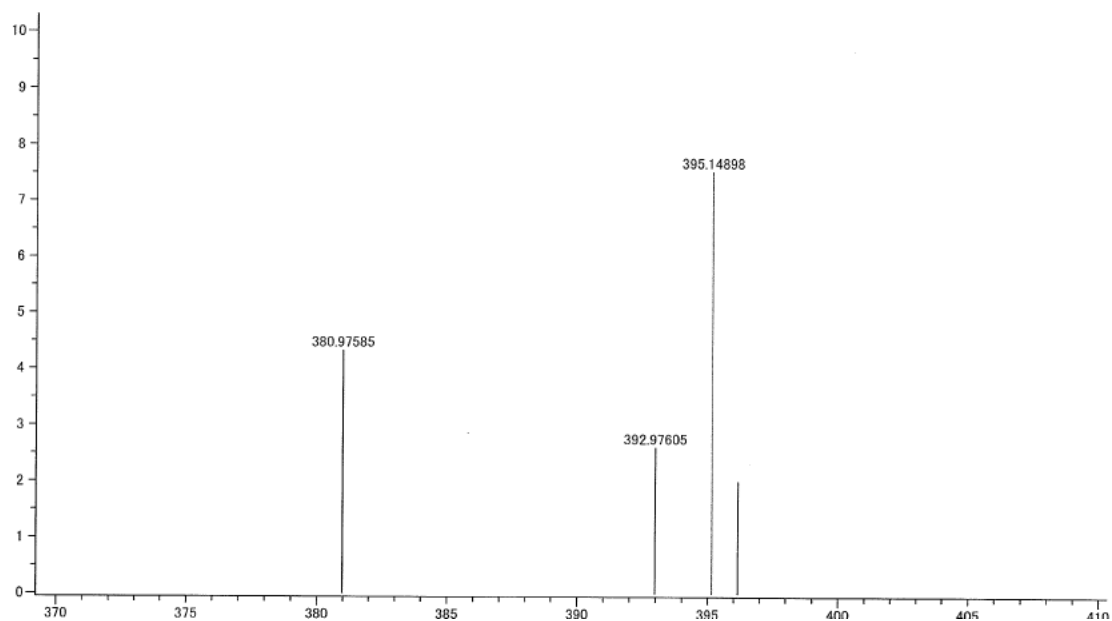

$^1\text{H}$ -NMR spectrum of **1p** ( $\text{CDCl}_3$ , 600 MHz)

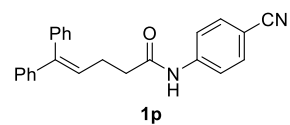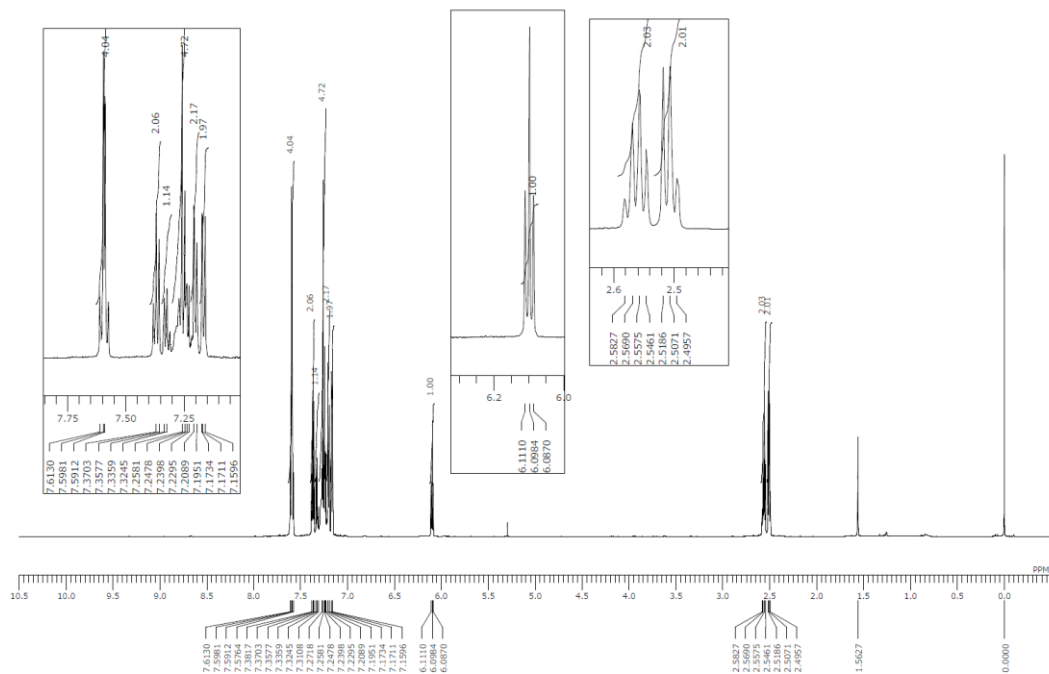



IR spectrum of **1p**

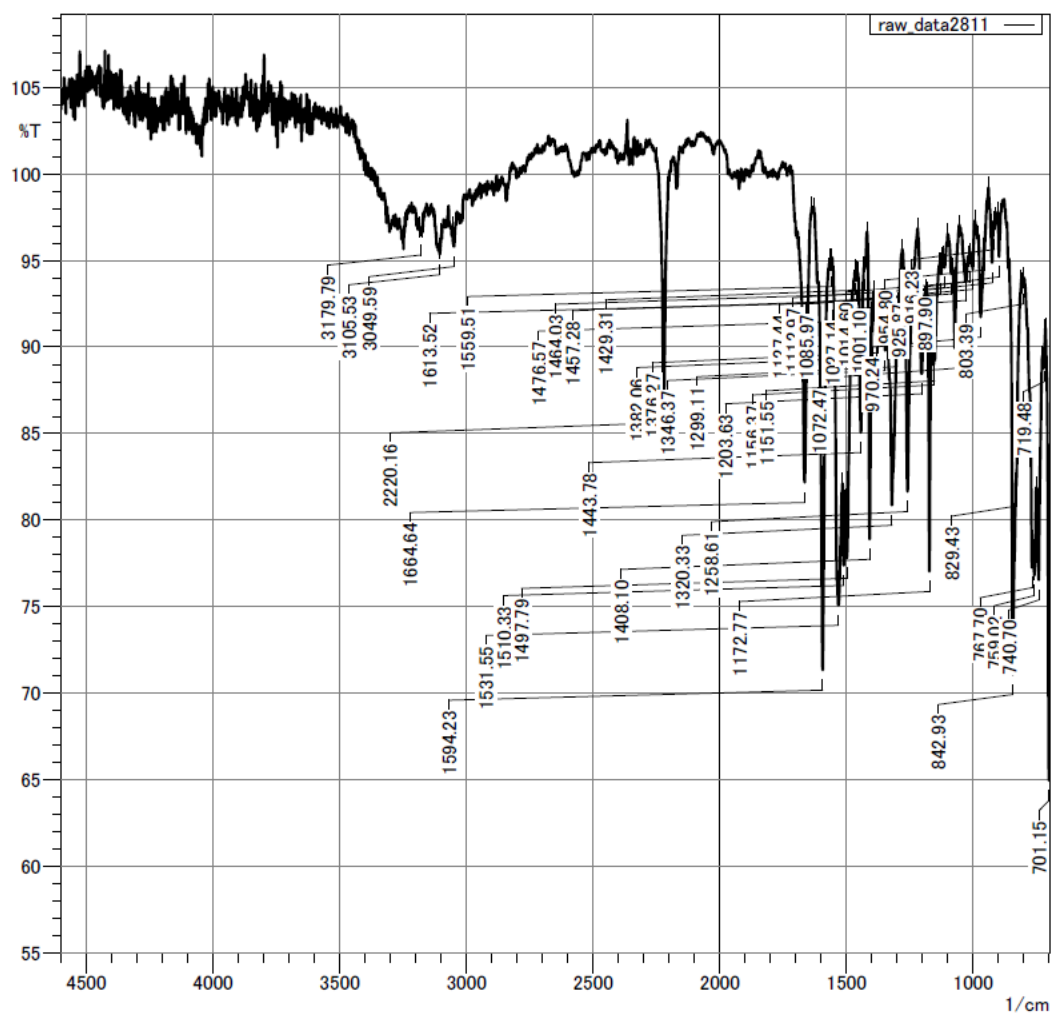

HRMS spectrum of **1p**

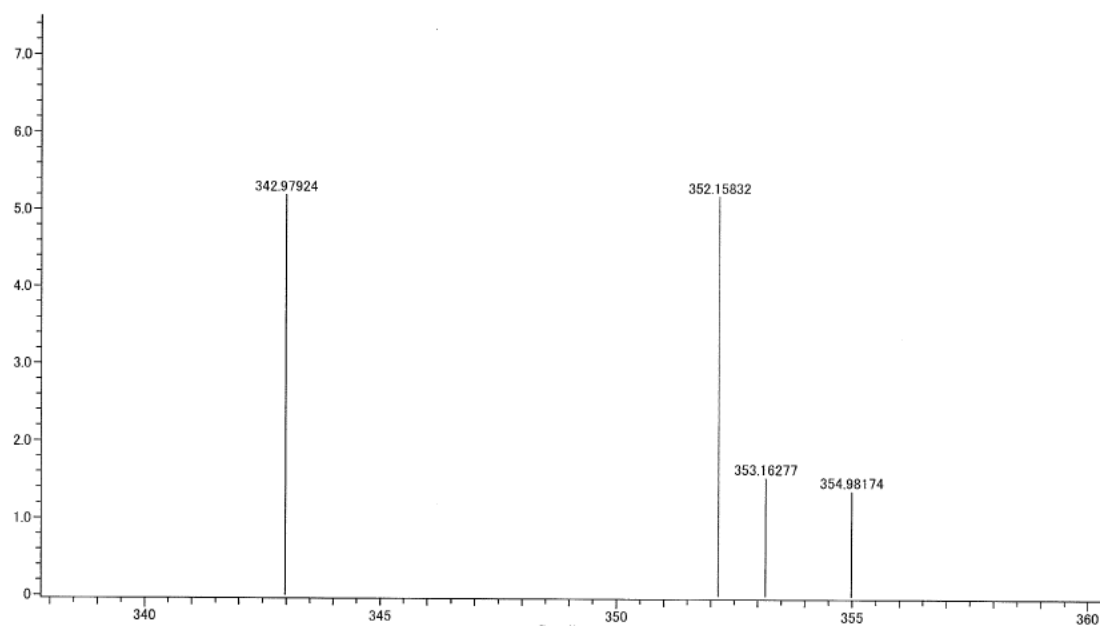

$^1\text{H}$ -NMR spectrum of **1q** (DMSO- $d_6$ , 600 MHz)

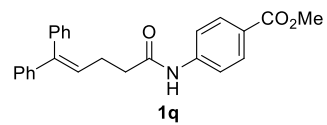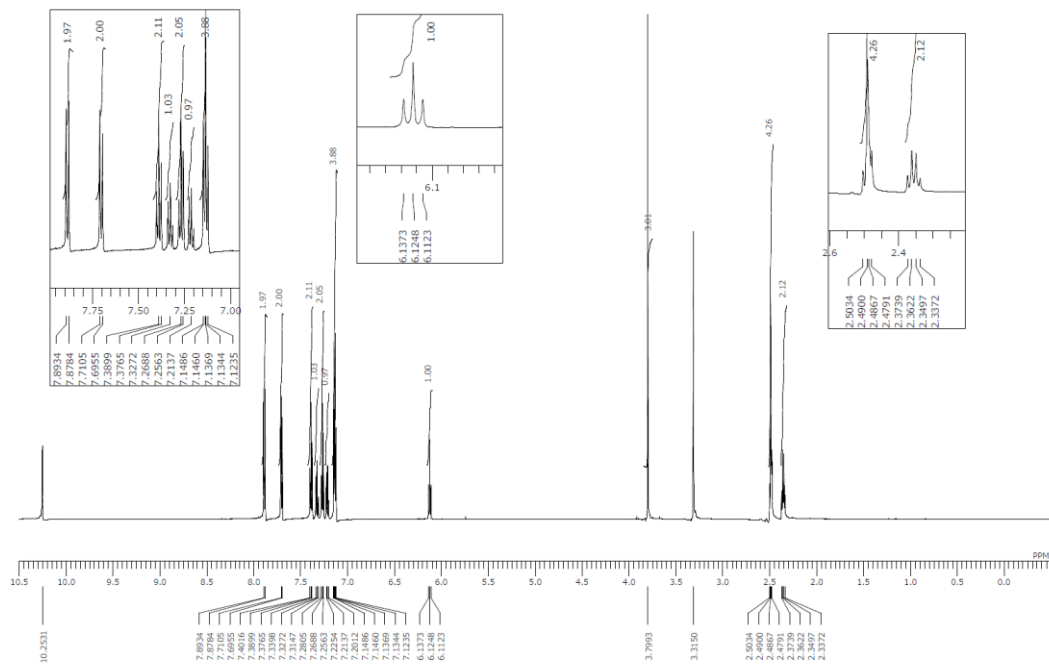

$^{13}\text{C}$ -NMR spectrum of **1q** (DMSO- $d_6$ , 150 MHz)

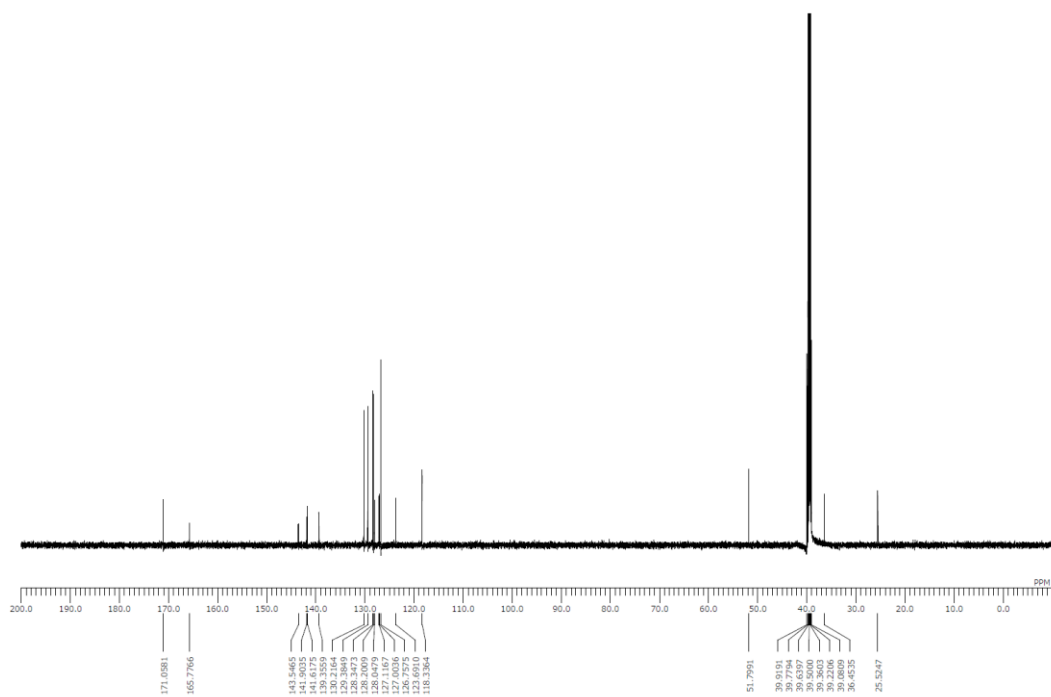

IR spectrum of **1q**

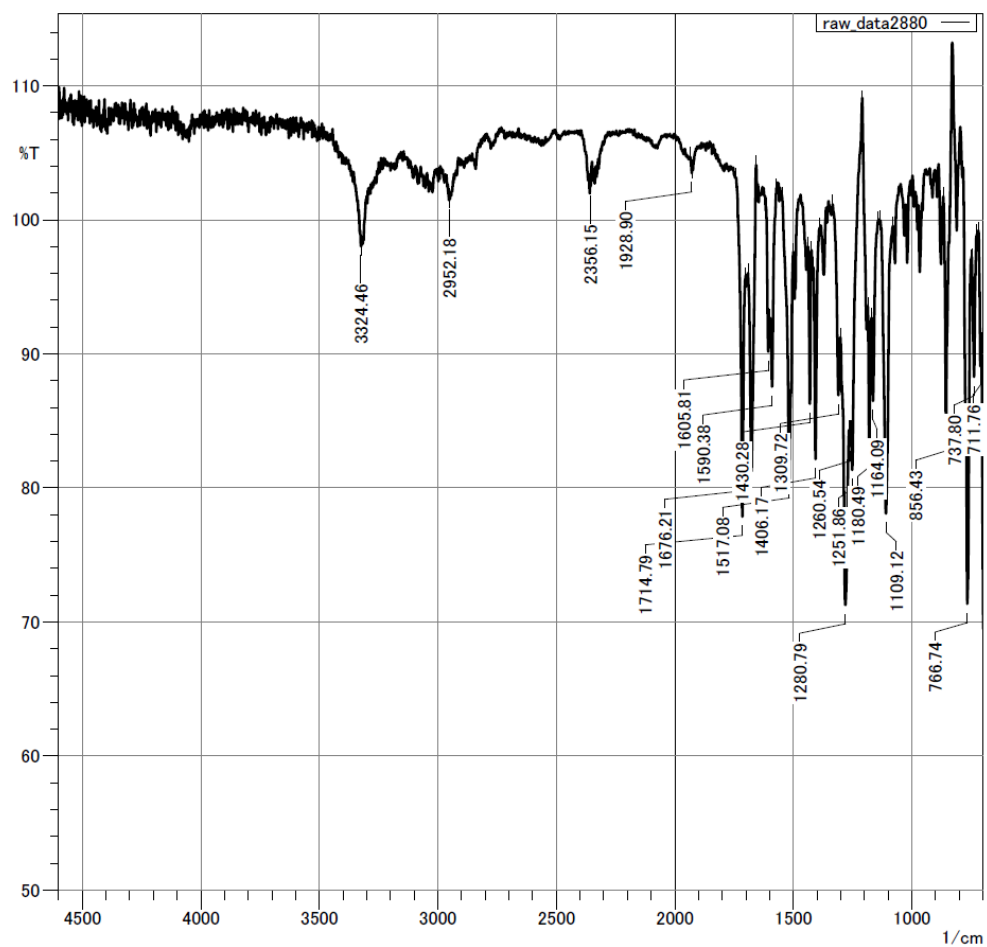

HRMS spectrum of **1q**

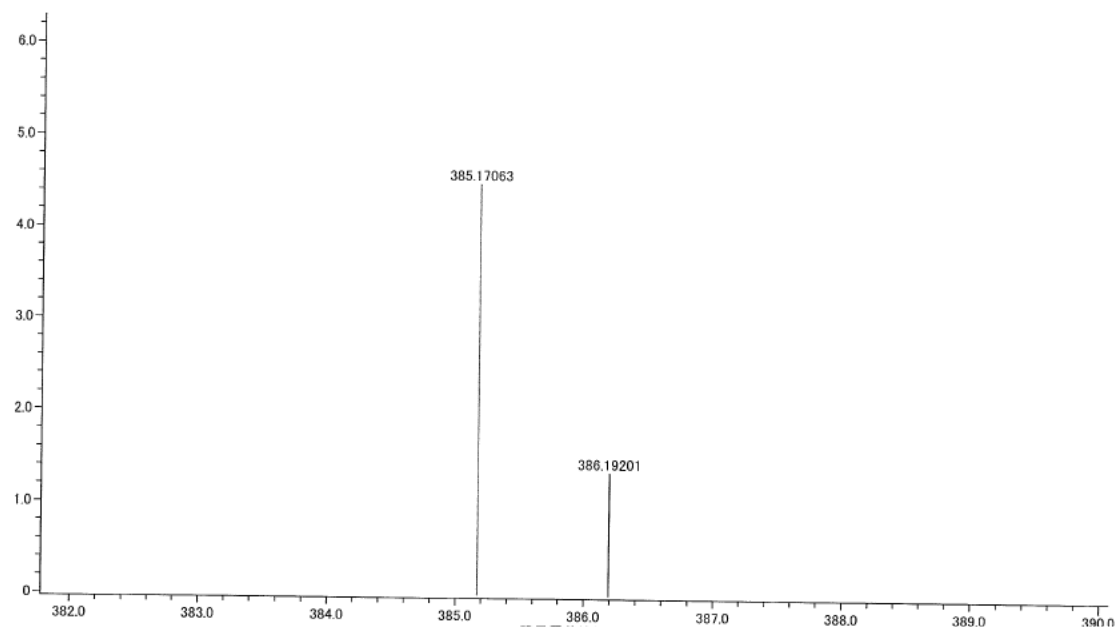

$^1\text{H}$ -NMR spectrum of **1r** ( $\text{CDCl}_3$ , 600 MHz)

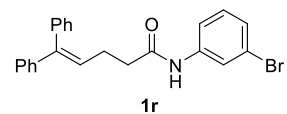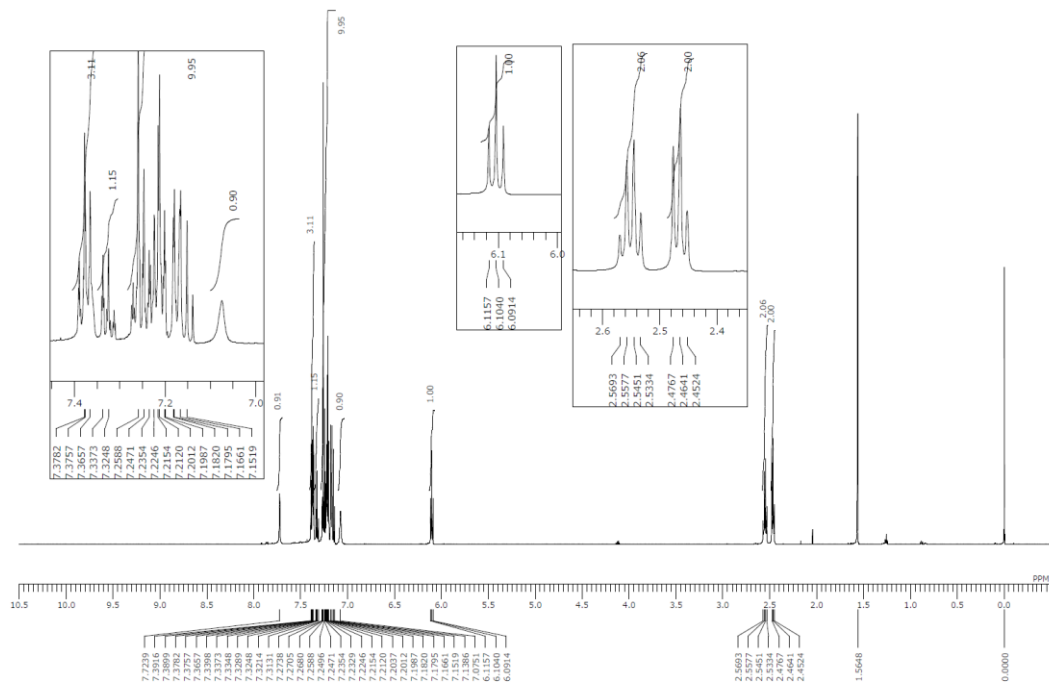

$^{13}\text{C}$ -NMR spectrum of **1r** ( $\text{CDCl}_3$ , 150 MHz)

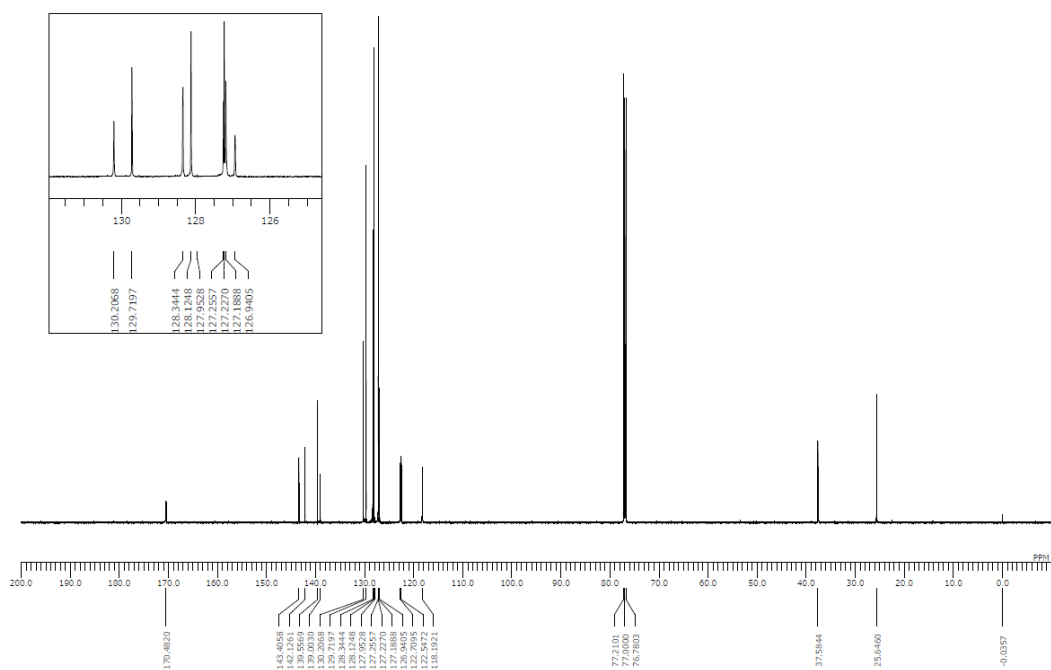

IR spectrum of **1r**

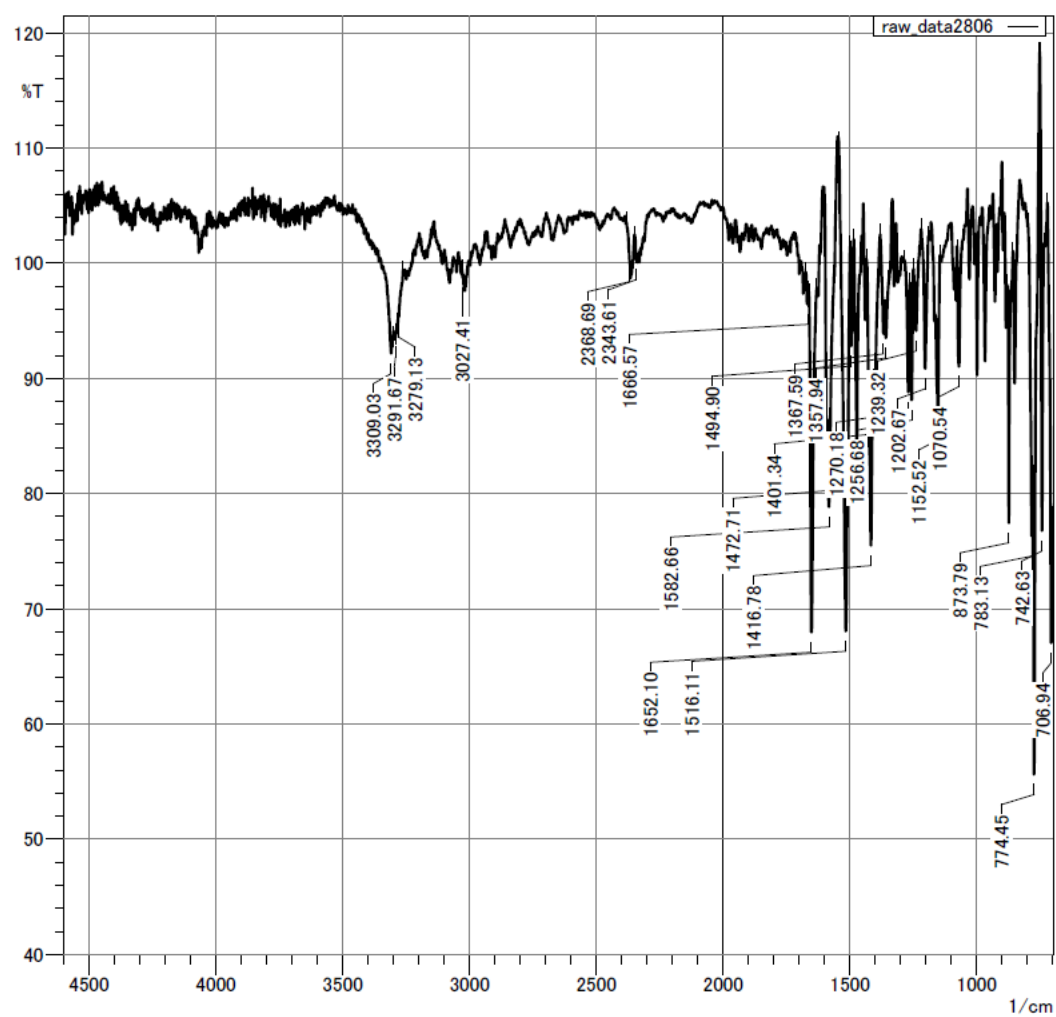

HRMS spectrum of **1r**

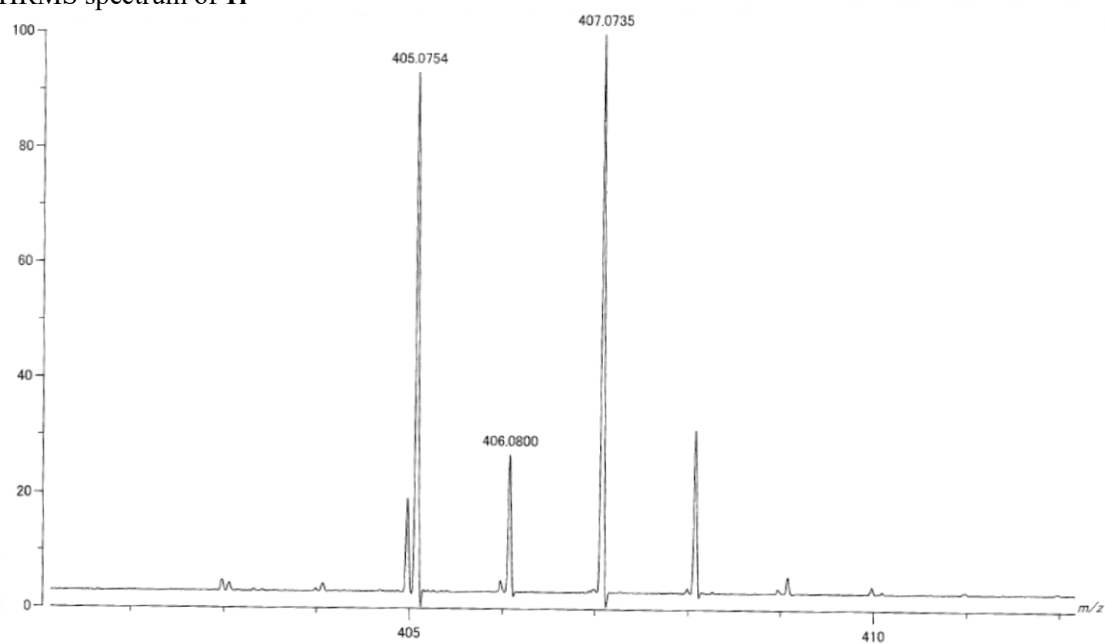

$^1\text{H}$ -NMR spectrum of **1s** ( $\text{CDCl}_3$ , 600 MHz)

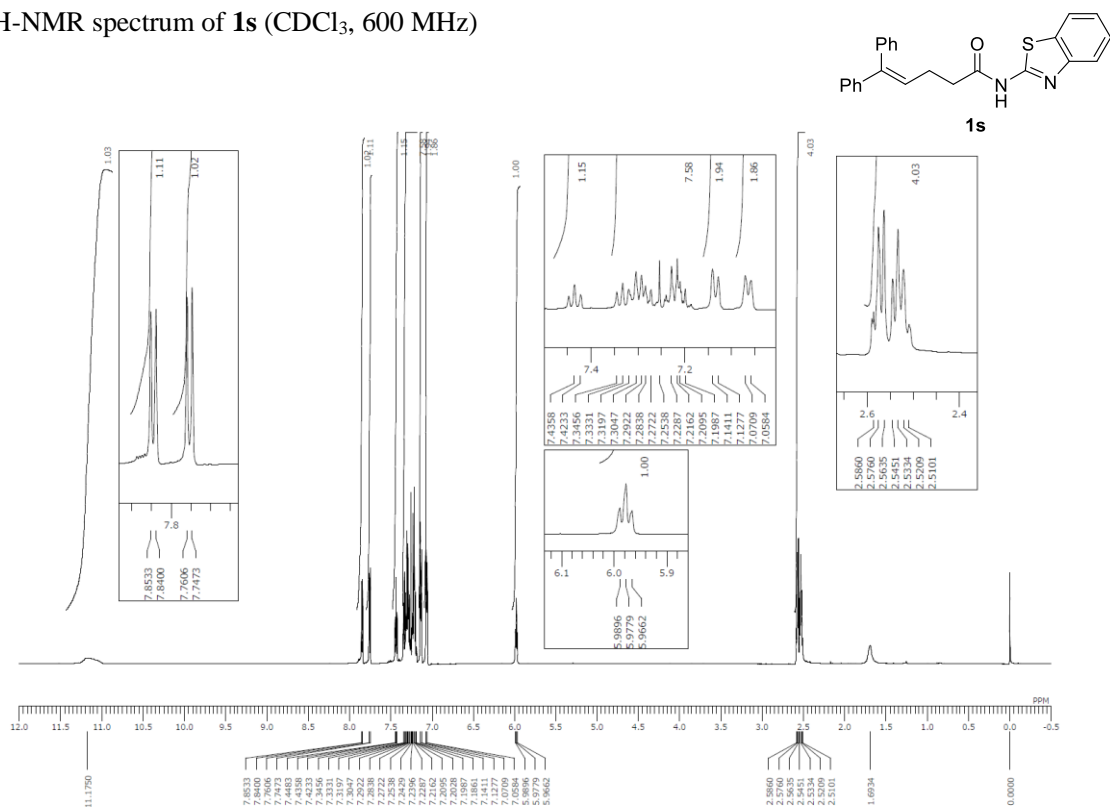

$^{13}\text{C}$ -NMR spectrum of **1s** ( $\text{CDCl}_3$ , 150 MHz)

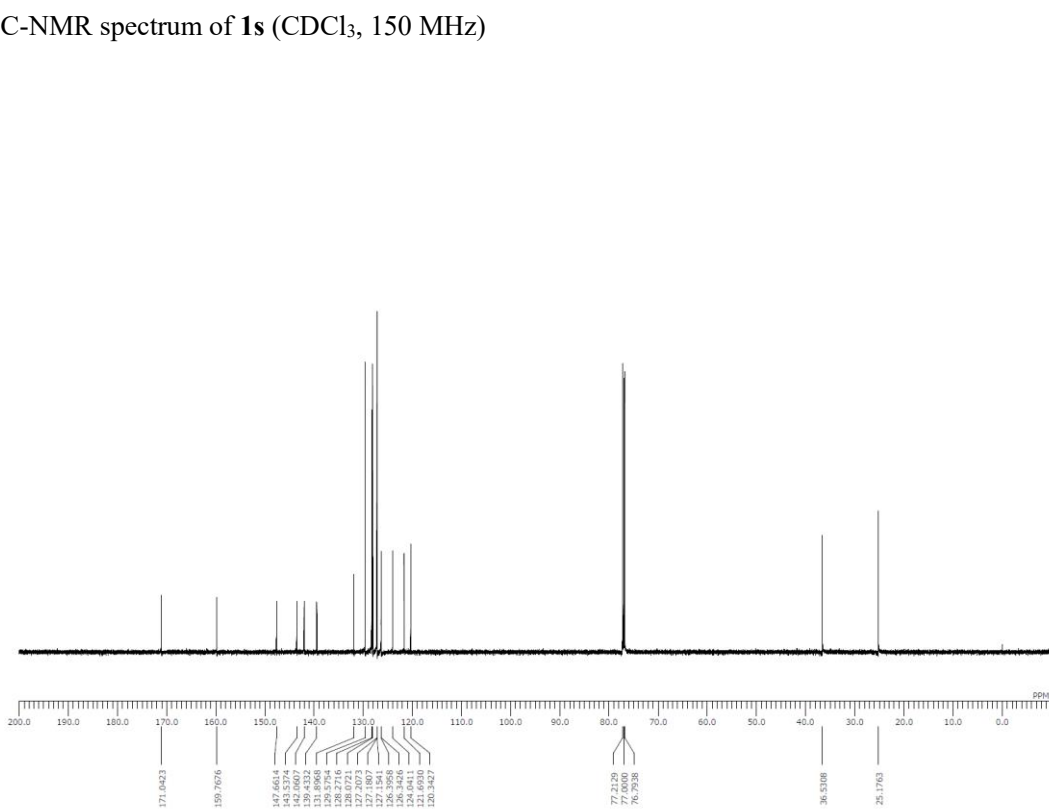

IR spectrum of **1s**

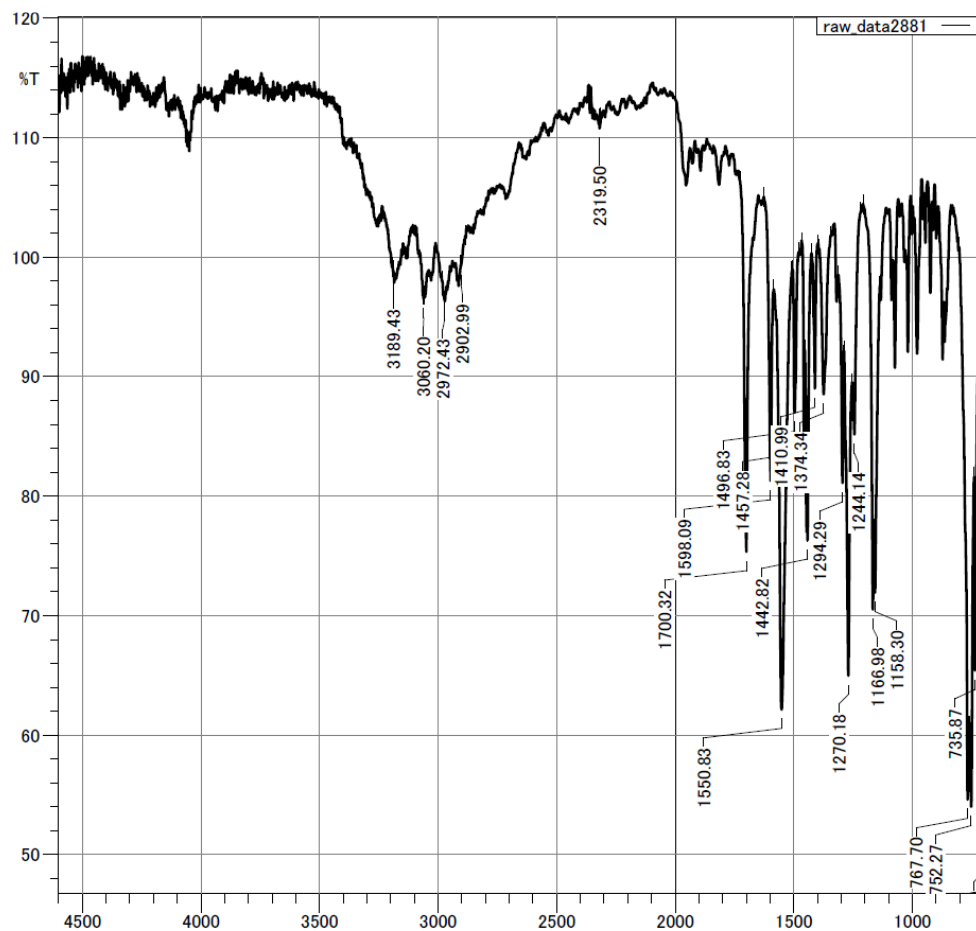

HRMS spectrum of **1s**

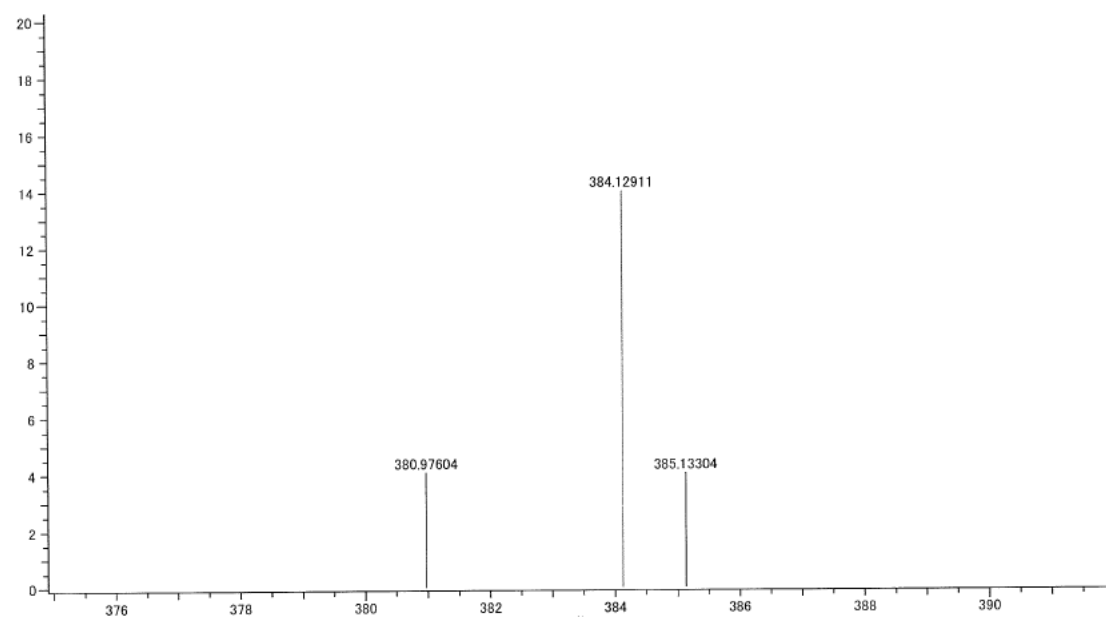

**2a**

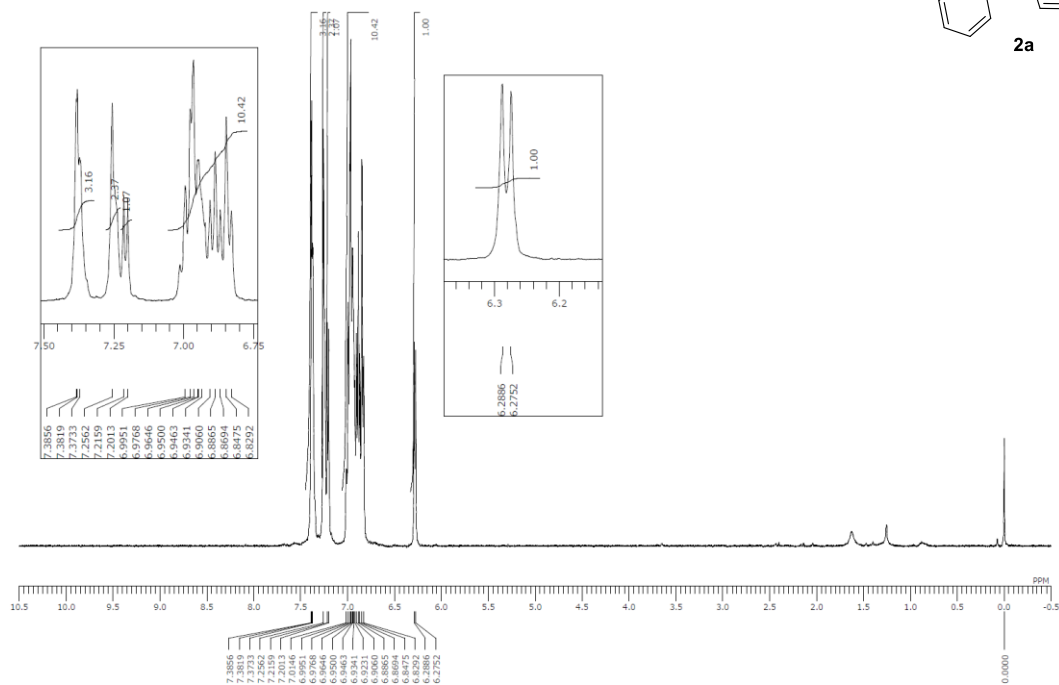

13C NMR spectrum of compound 10a. The x-axis represents chemical shift in ppm, ranging from 200.0 to 0.0. The spectrum shows several sharp peaks. A small peak is at 171.8242 ppm. A cluster of peaks is between 120 and 145 ppm, with labels: 140.5400, 138.6619, 138.6619, 137.8139, 131.6487, 130.8916, 128.4297, 127.8805, 127.8805, 127.0795, 124.0642. A very large, sharp peak is at 77.3211 ppm, with smaller peaks at 77.6000 and 76.6789 ppm. A small peak is at 11.5000 ppm.



IR spectrum of **2a**

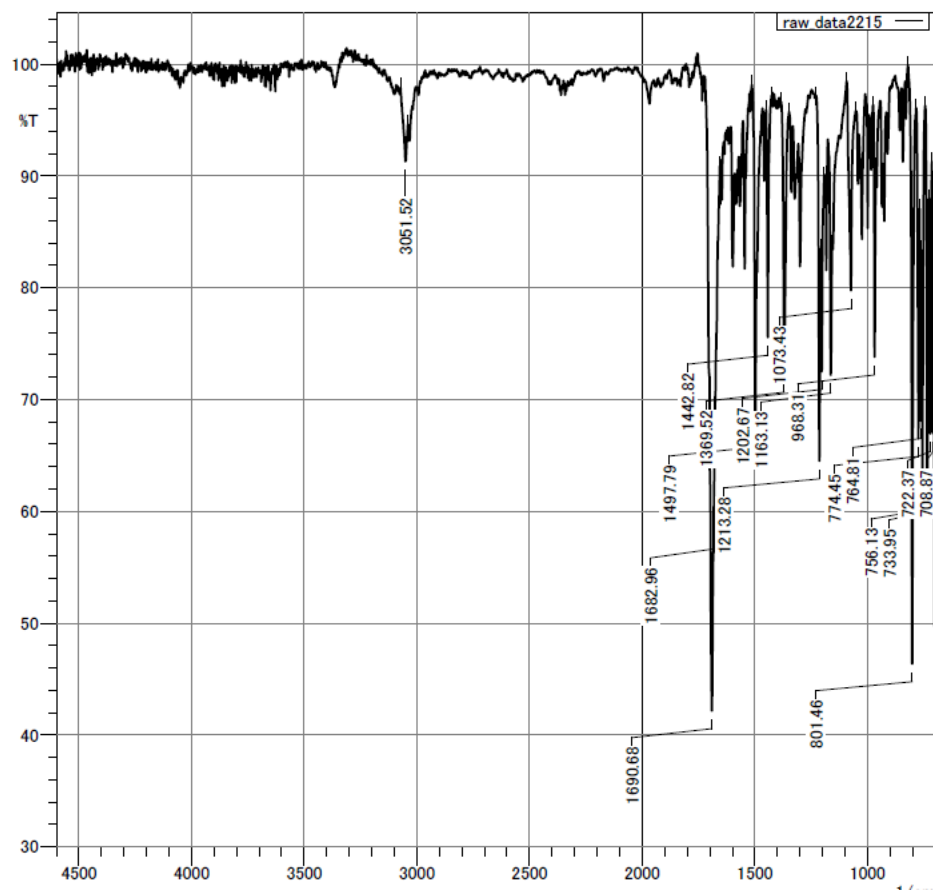

HRMS spectrum of **2a**

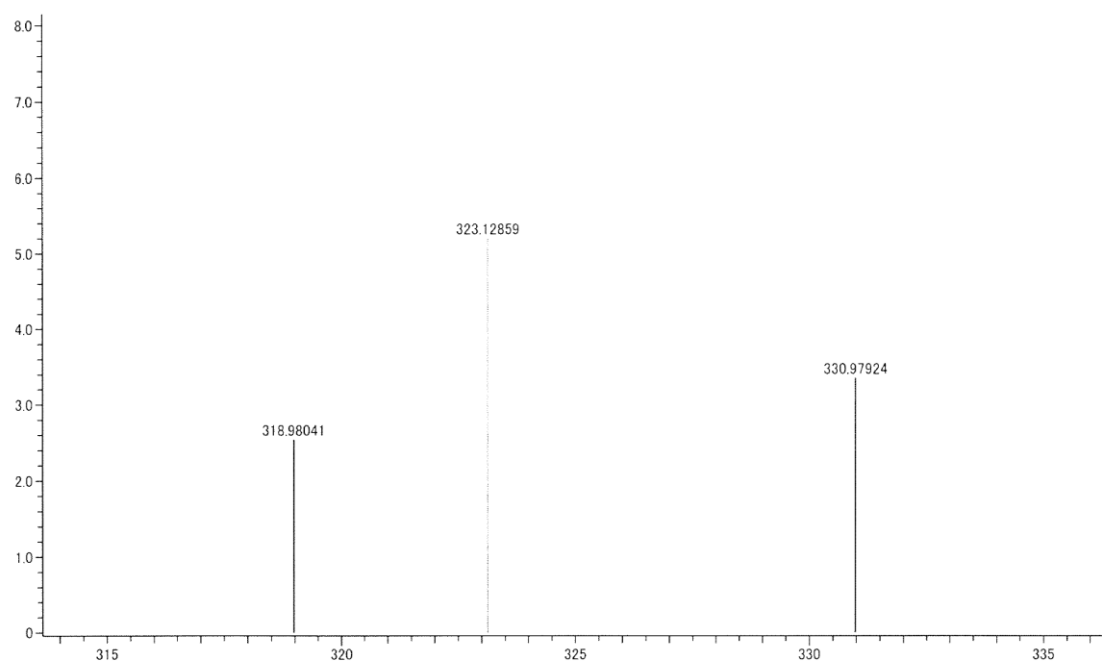

$^1\text{H}$ -NMR spectrum of **2b** ( $\text{CDCl}_3$ , 600 MHz)

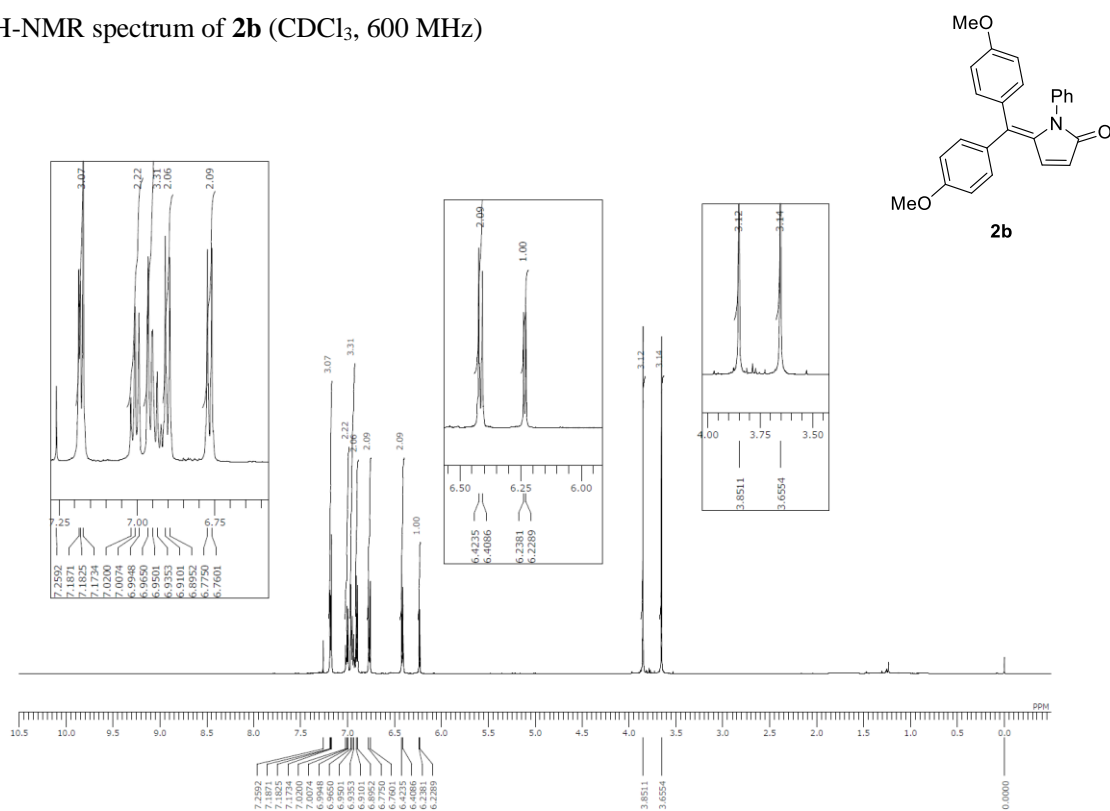

$^{13}\text{C}$ -NMR spectrum of **2b** ( $\text{CDCl}_3$ , 150 MHz)

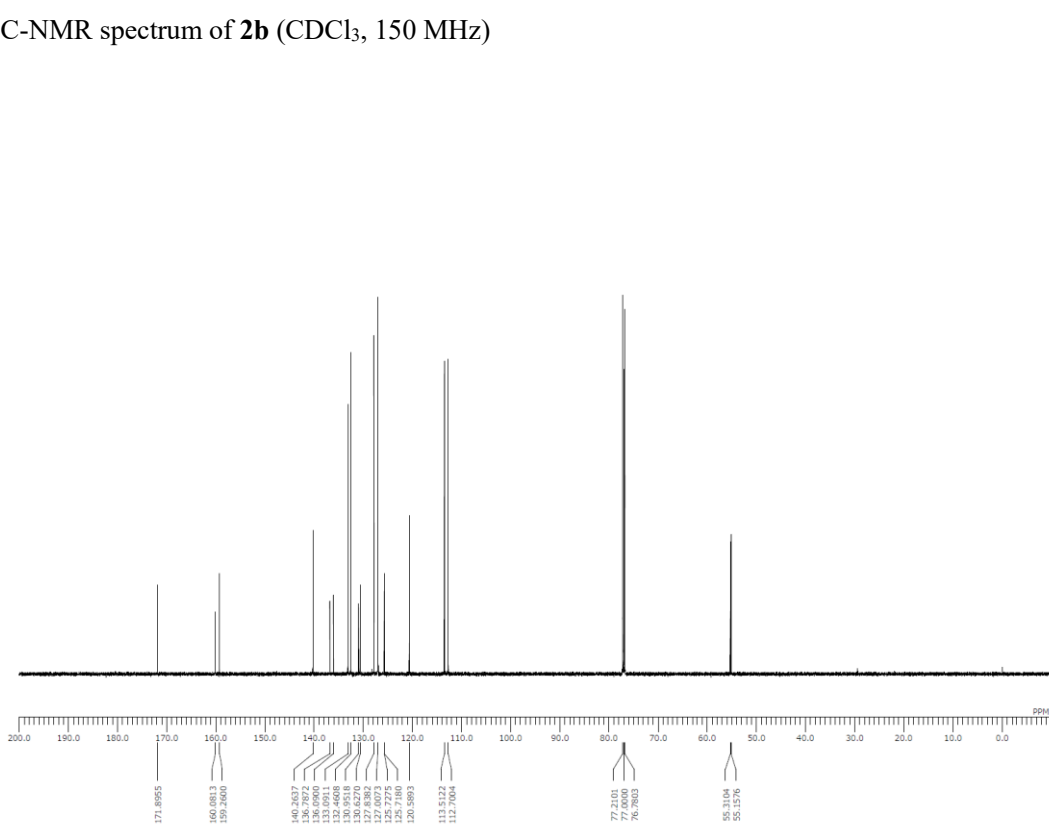

IR spectrum of **2b**

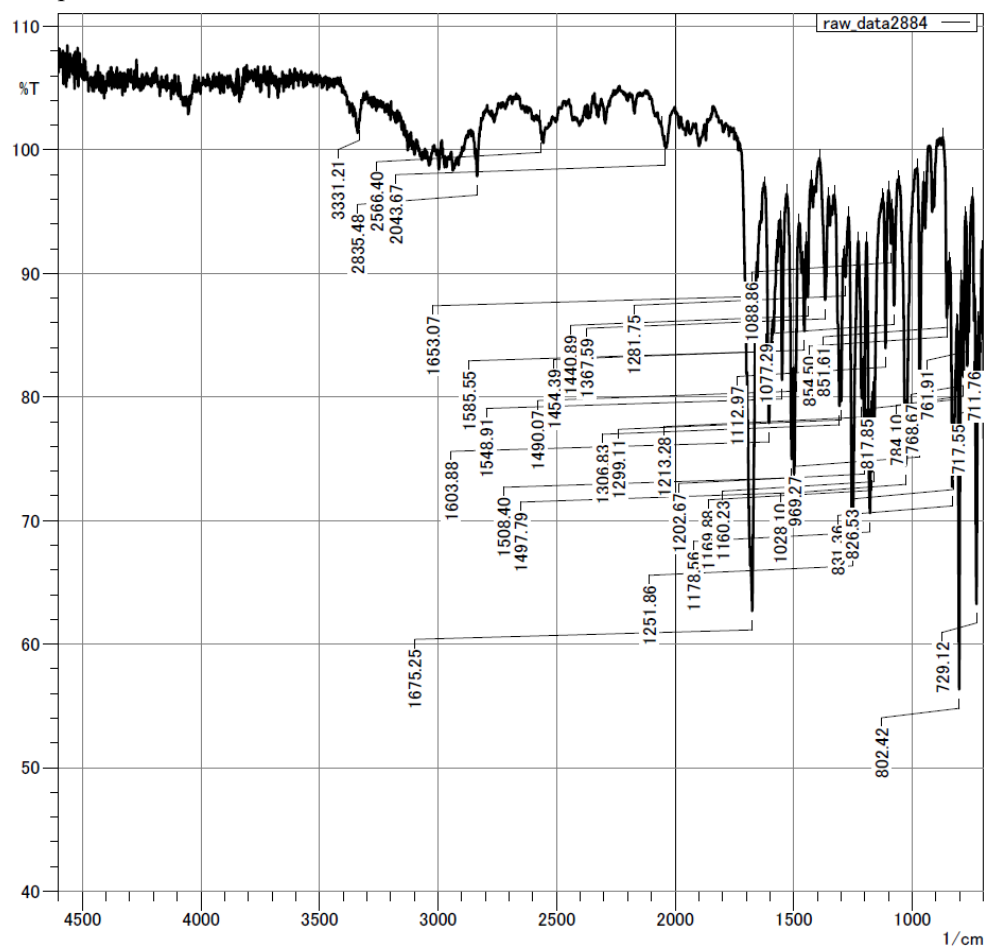

HRMS spectrum of **2b**

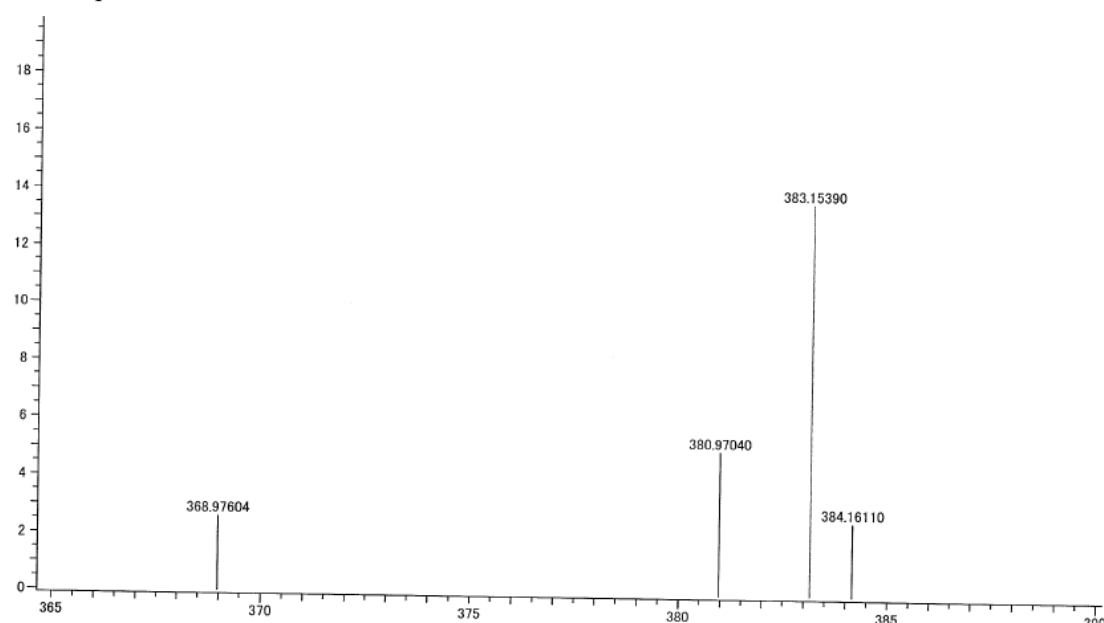

$^1\text{H}$ -NMR spectrum of **2c** ( $\text{DMSO}-d_6$ , 600 MHz)

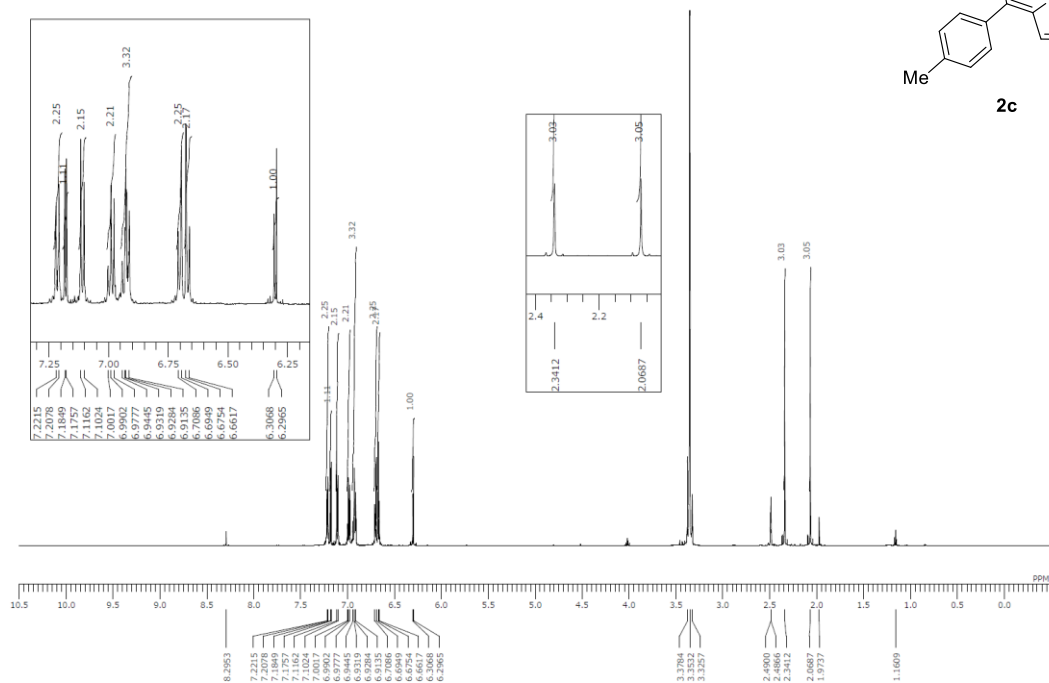

$^{13}\text{C}$ -NMR spectrum of **2c** ( $\text{DMSO}-d_6$ , 150 MHz)

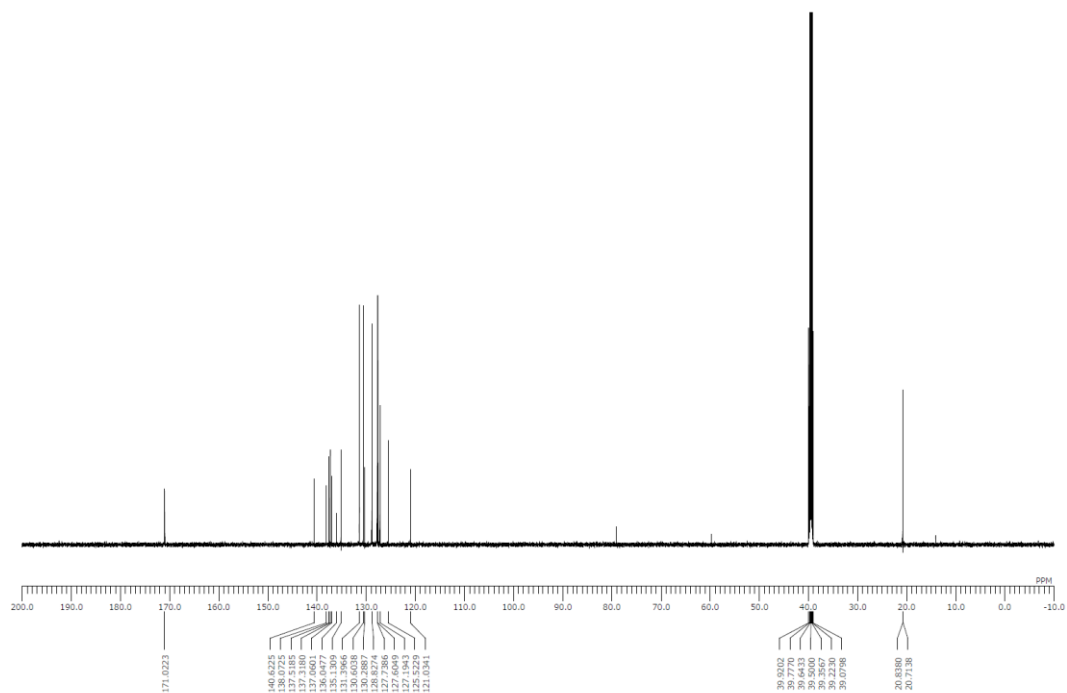

IR spectrum of **2c**

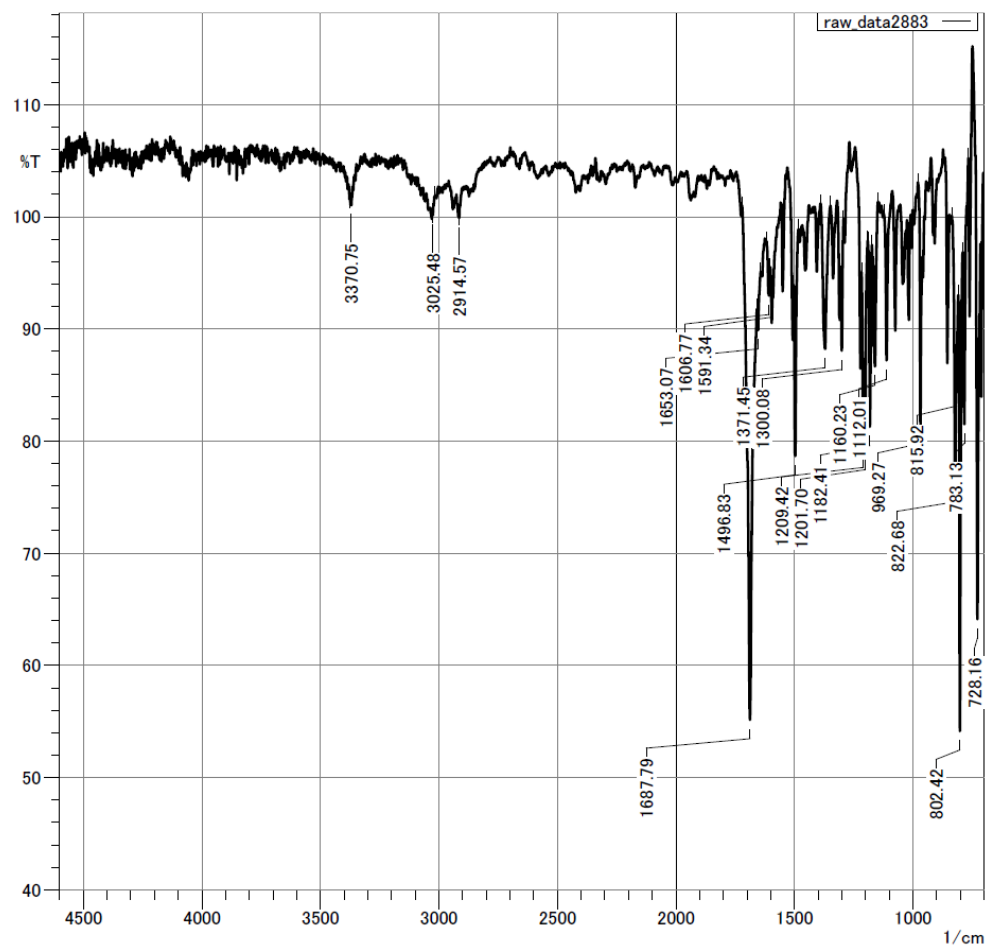

HRMS spectrum of **2c**

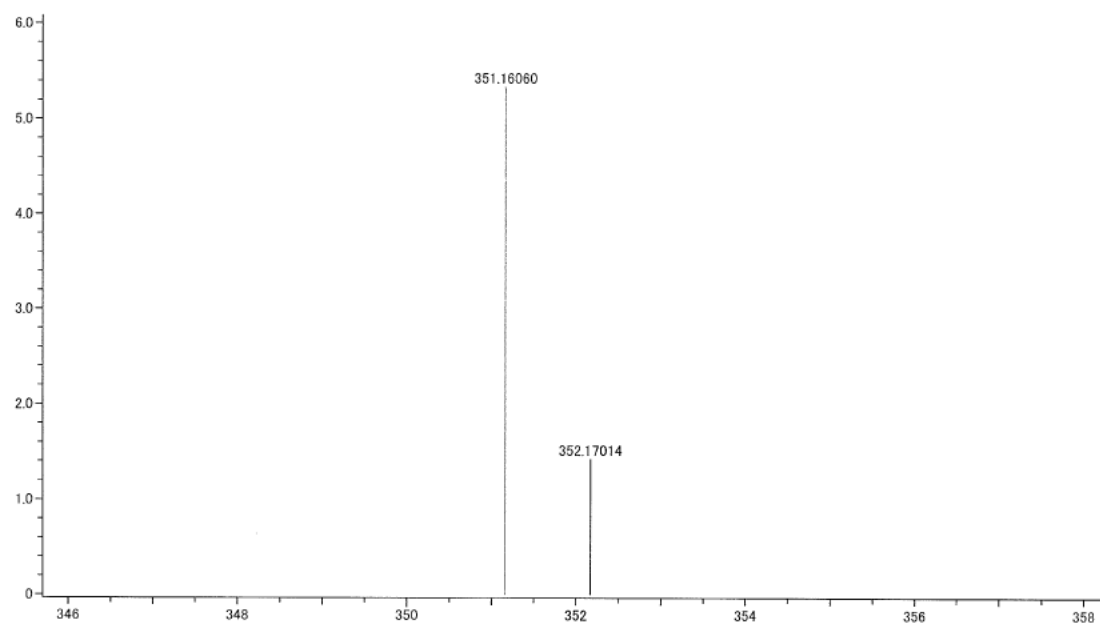

$^1\text{H}$ -NMR spectrum of **2d** ( $\text{CDCl}_3$ , 600 MHz)

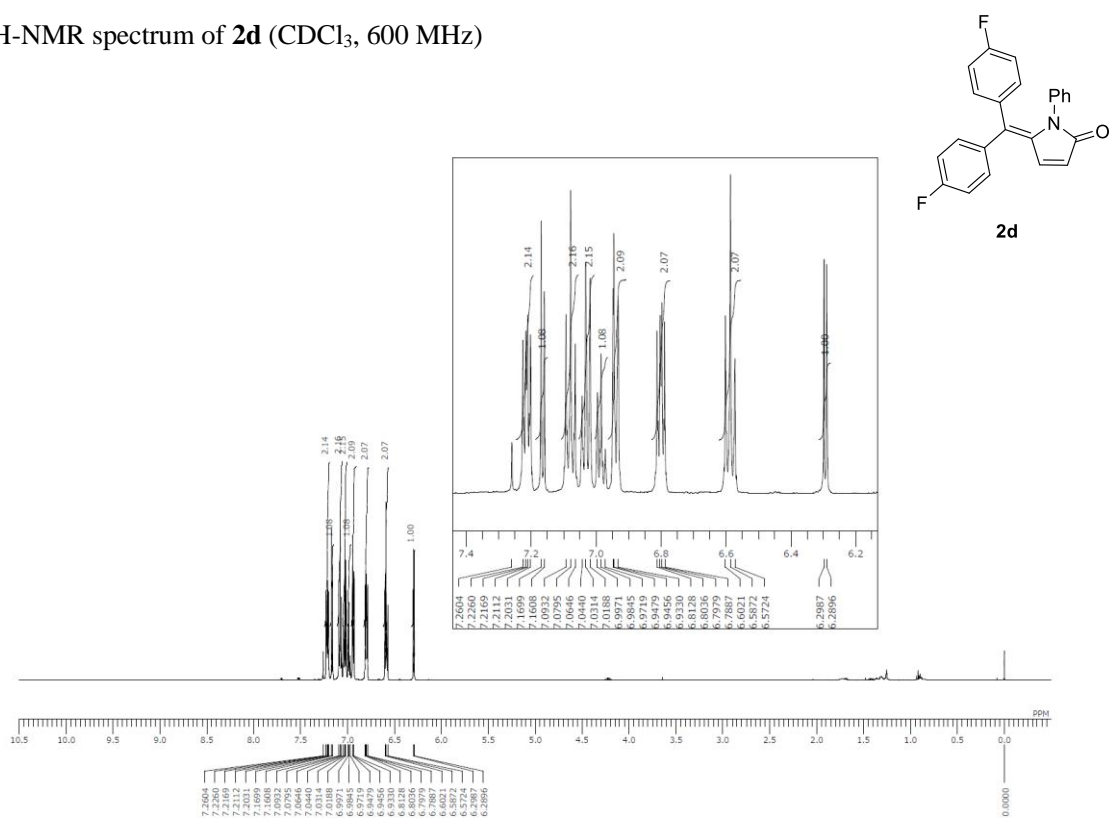

$^{13}\text{C}$ -NMR spectrum of **2d** ( $\text{CDCl}_3$ , 150 MHz)

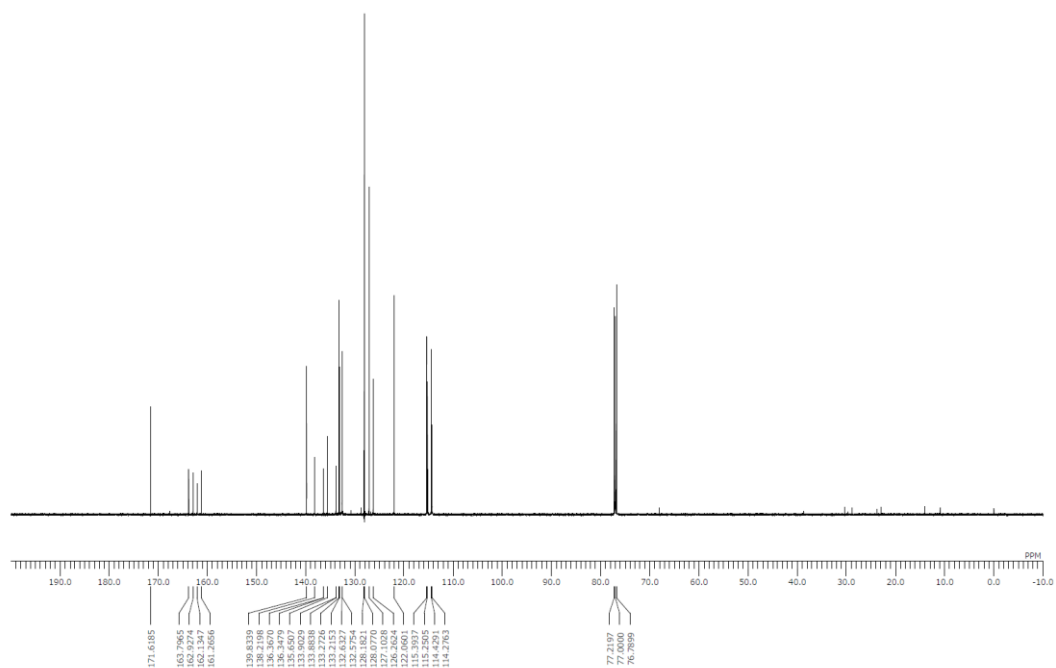

$^{19}\text{F}$ -NMR spectrum of **2d** ( $\text{CDCl}_3$ , 565 MHz)

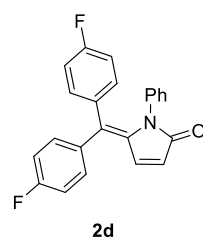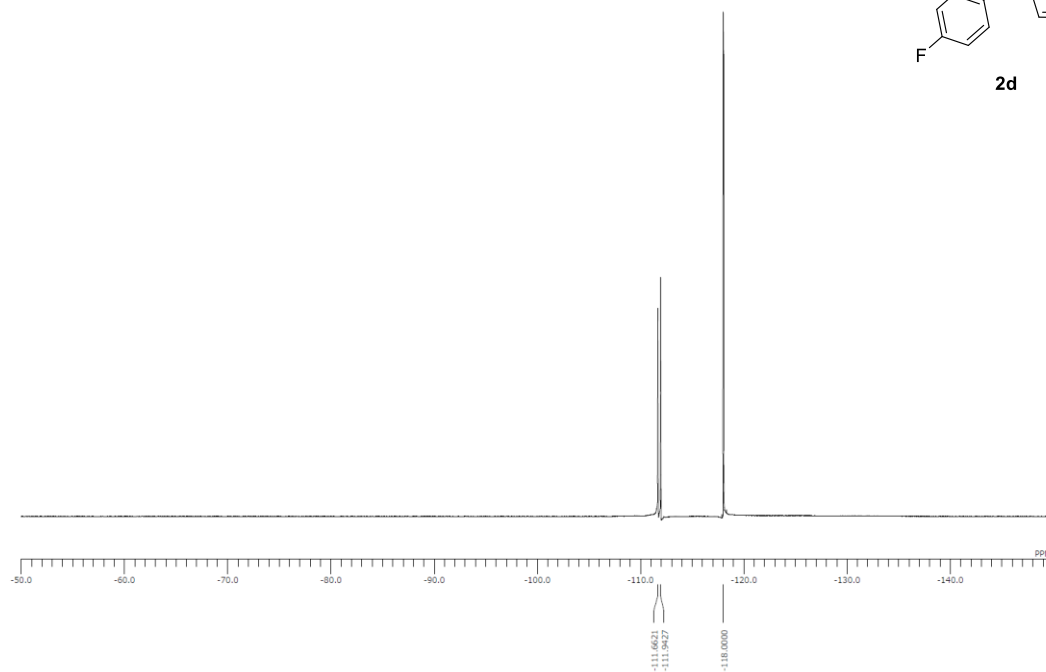

IR spectrum of **2d**

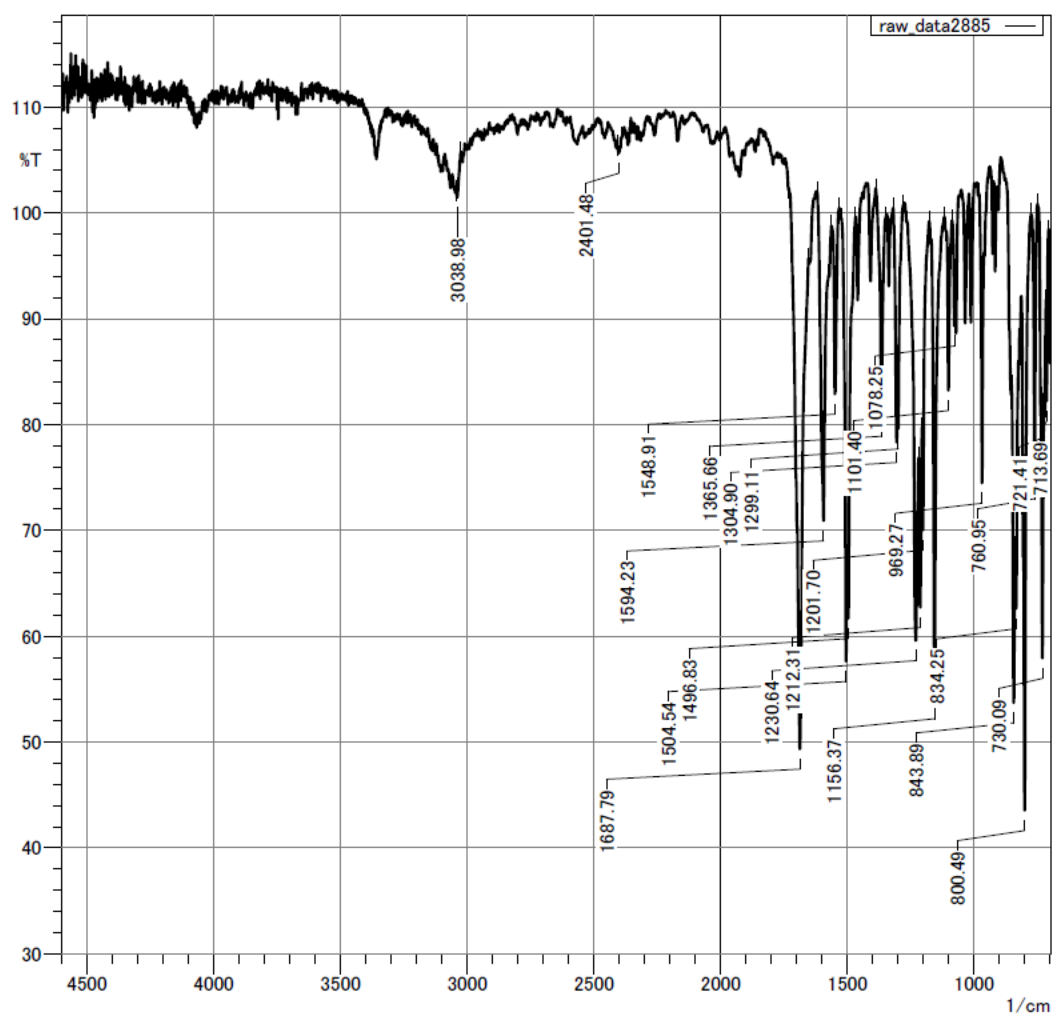

HRMS spectrum of **2d**

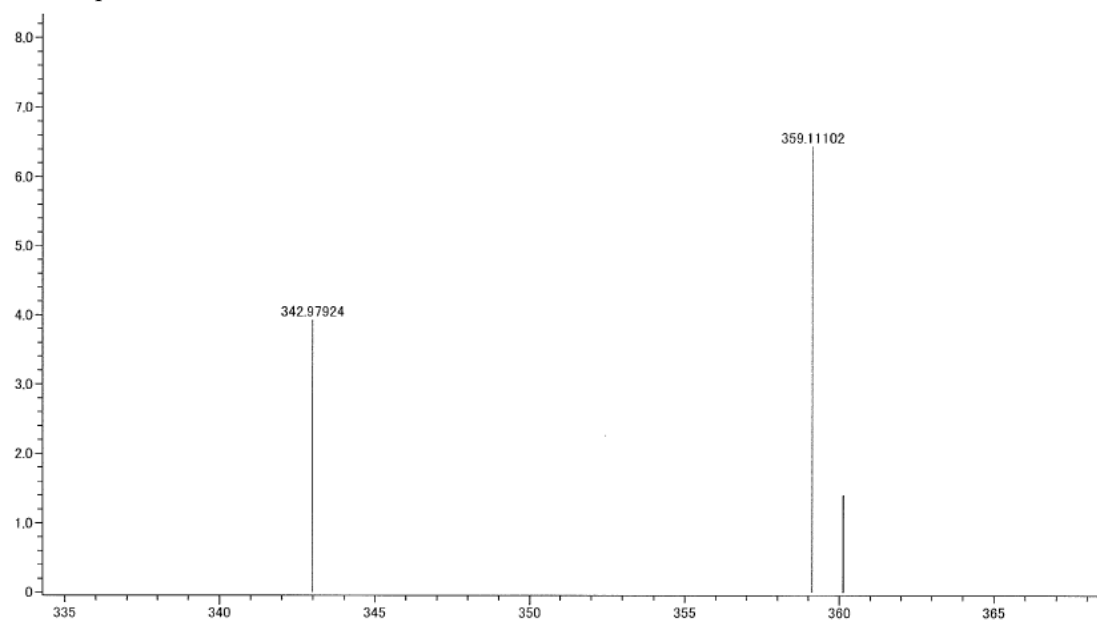



$^1\text{H}$ -NMR spectrum of **2e** ( $\text{CDCl}_3$ , 600 MHz)

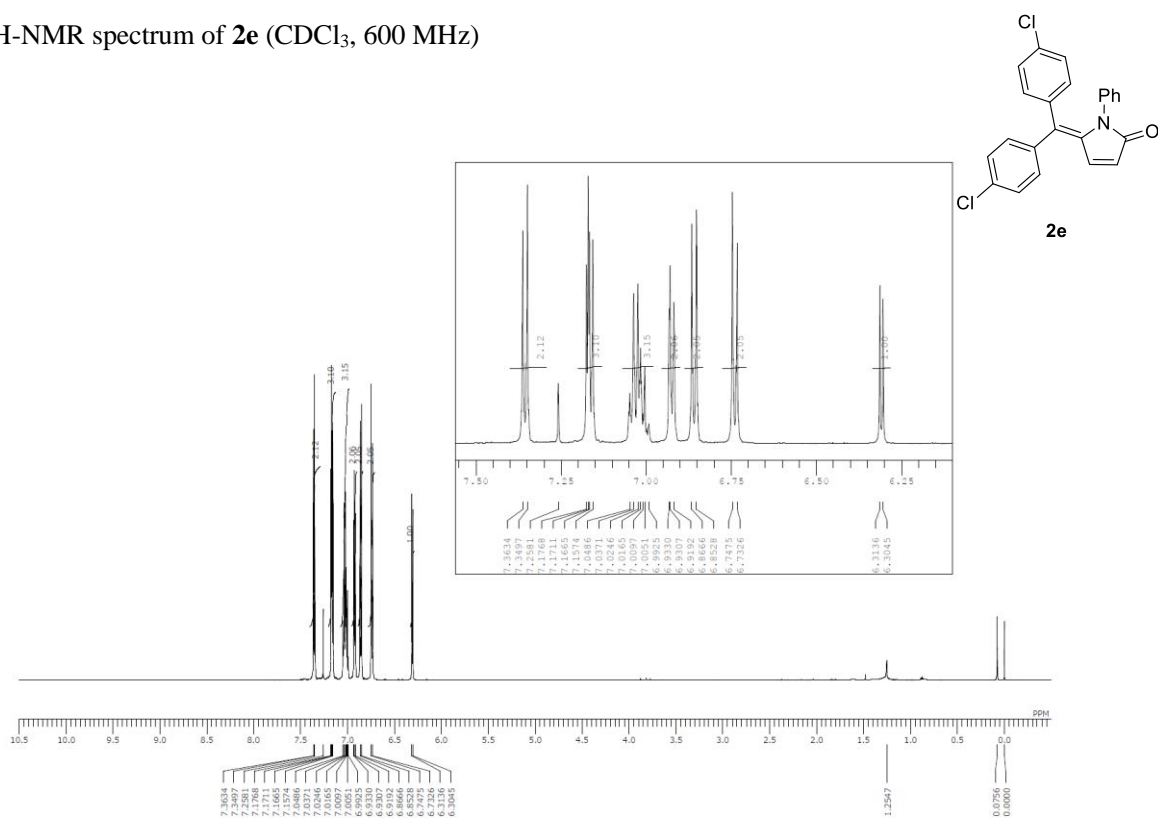

$^{13}\text{C}$ -NMR spectrum of **2e** ( $\text{CDCl}_3$ , 150 MHz)

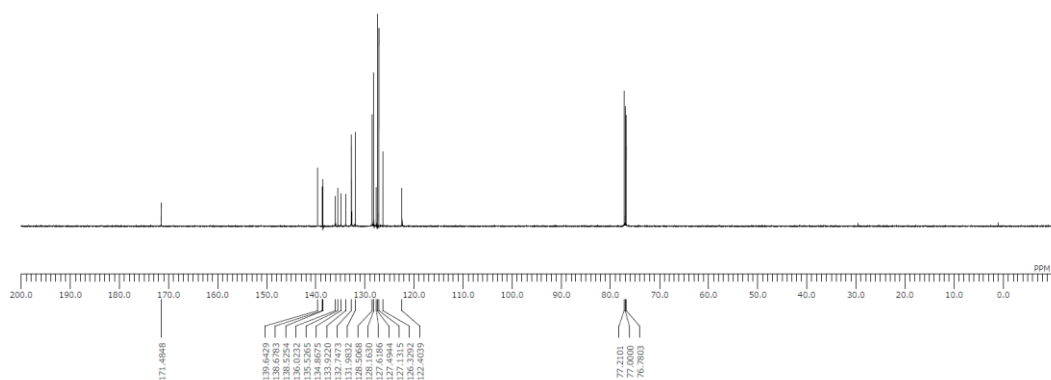

IR spectrum of **2e**

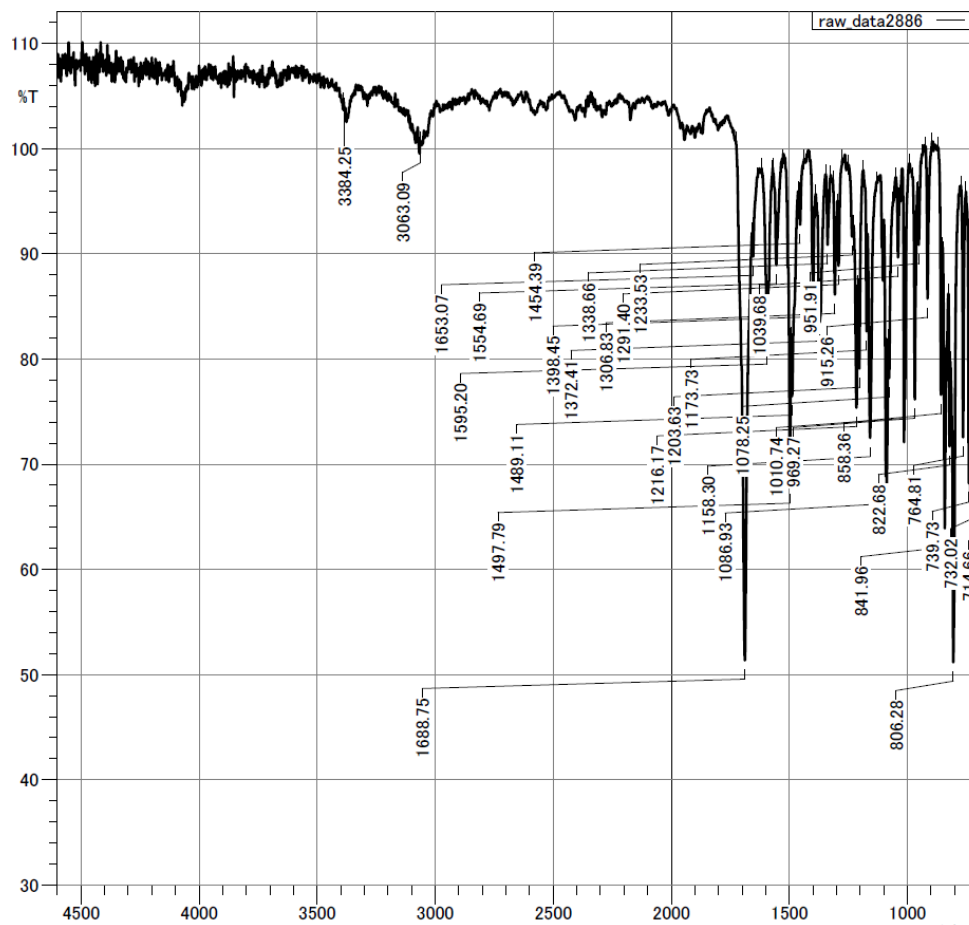

HRMS spectrum of **2e**

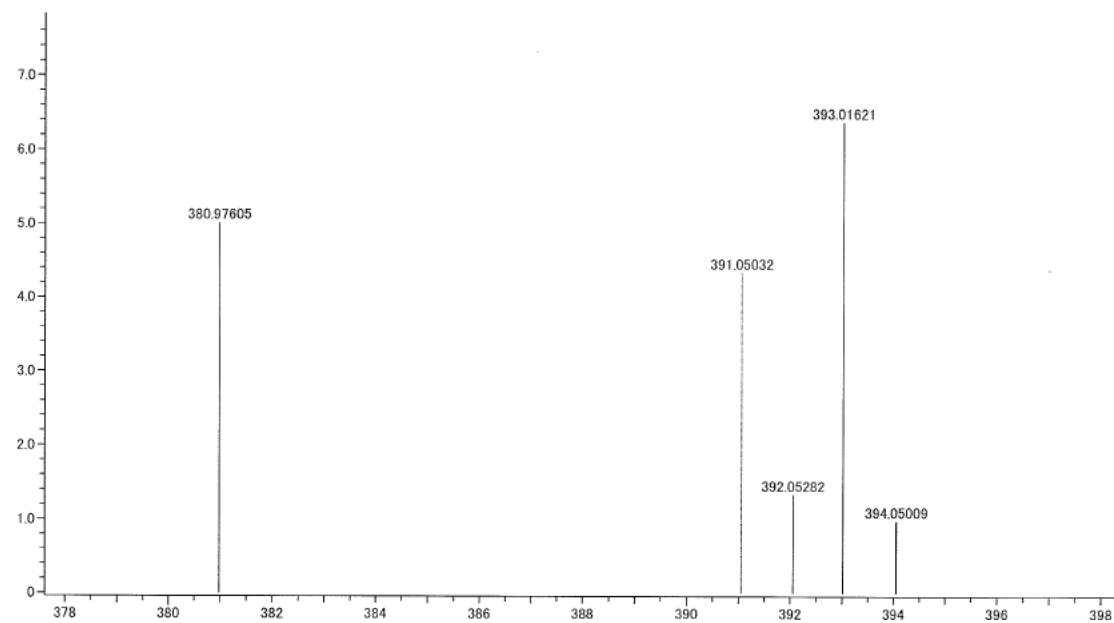

$^1\text{H}$ -NMR spectrum of **2f** ( $\text{CDCl}_3$ , 600 MHz)

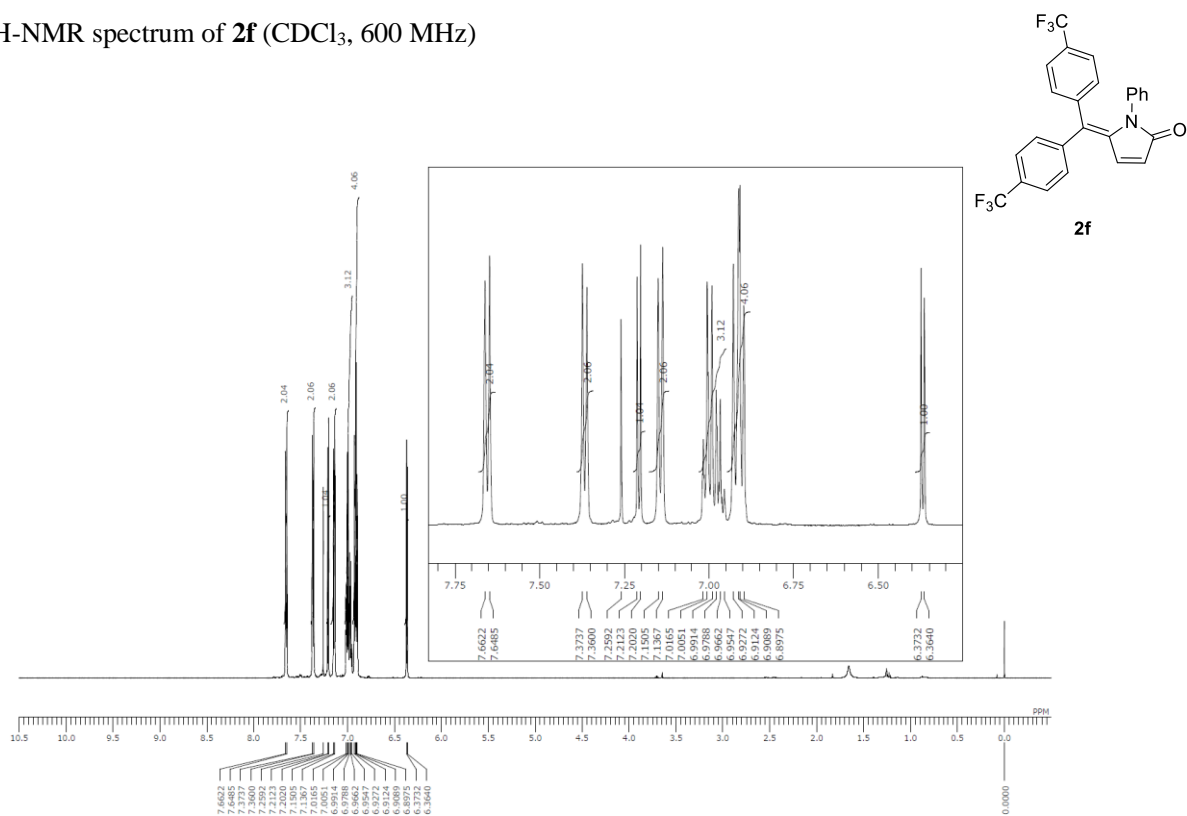

$^{13}\text{C}$ -NMR spectrum of **2f** ( $\text{CDCl}_3$ , 150 MHz)

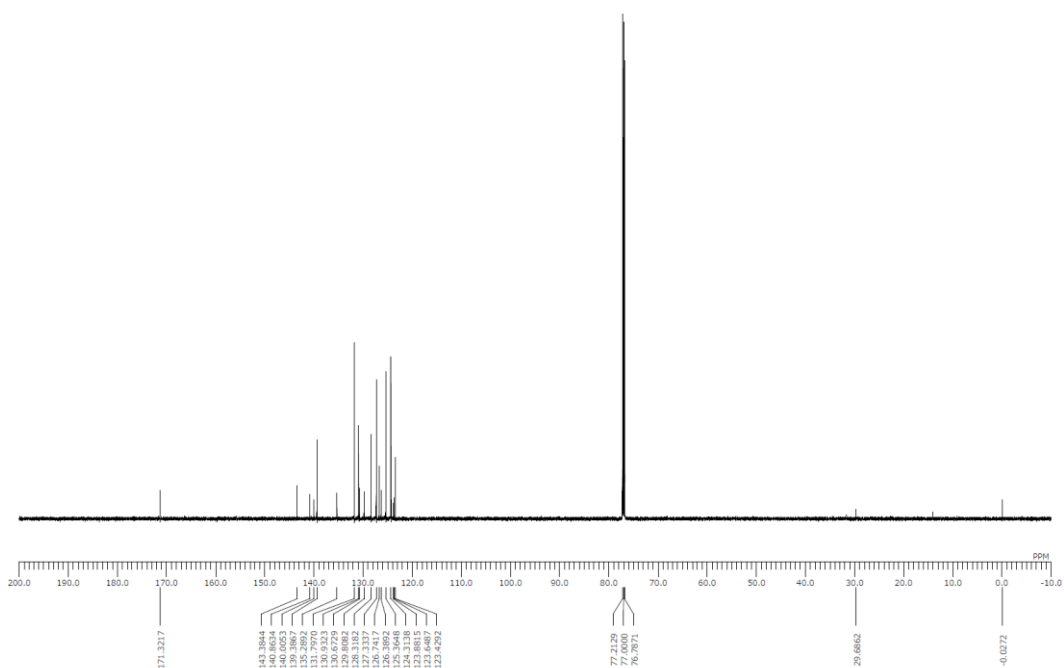

$^{19}\text{F}$ -NMR spectrum of **2f** ( $\text{CDCl}_3$ , 565 MHz)

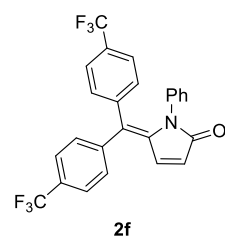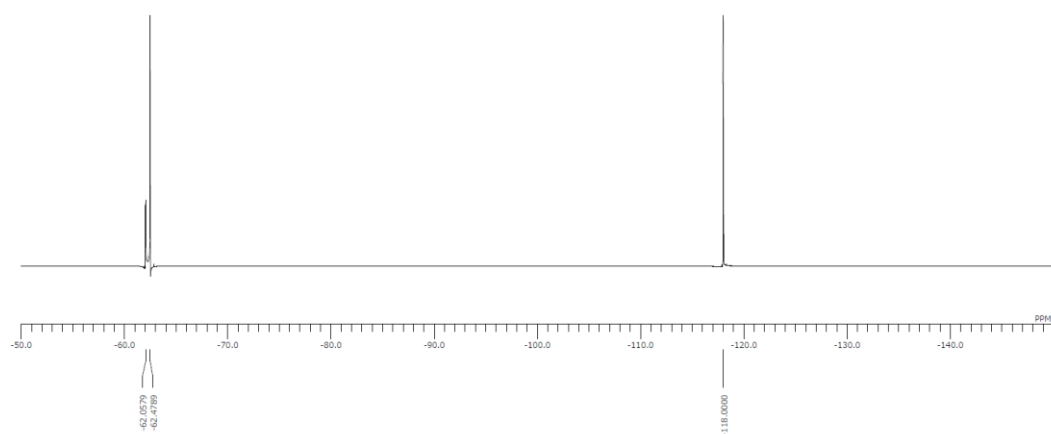

IR spectrum of **2f**

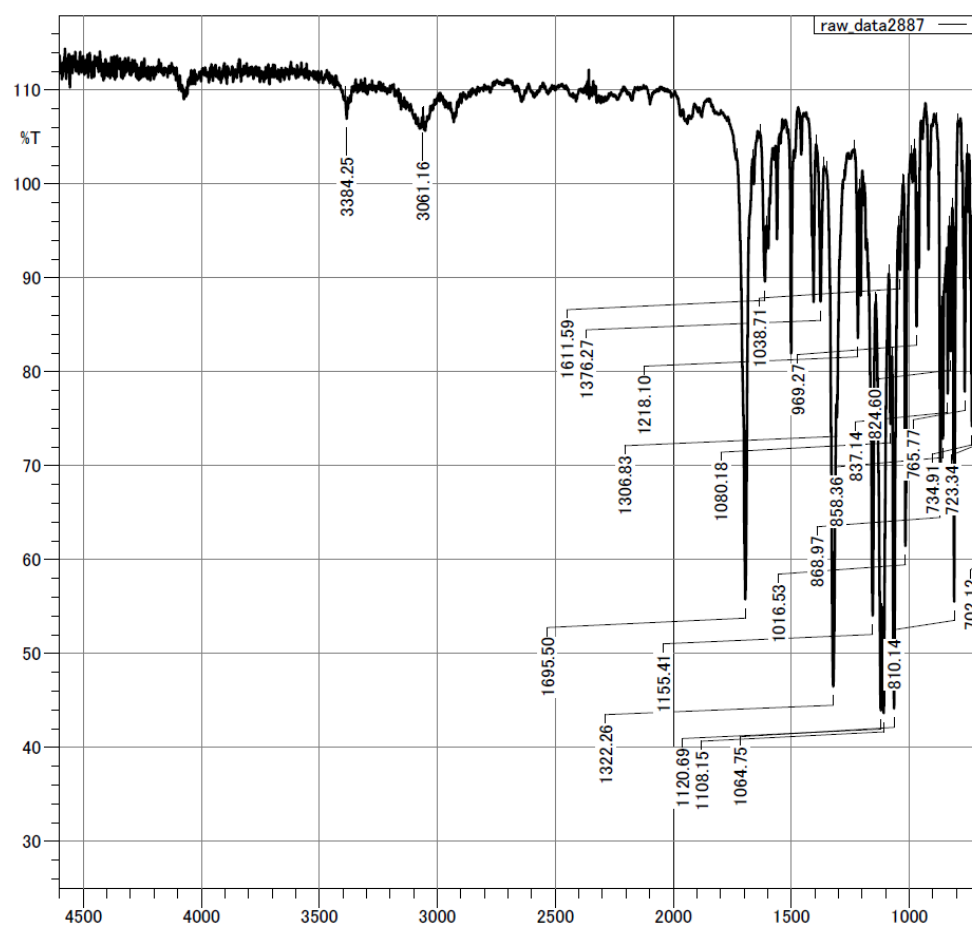

HRMS spectrum of **2f**

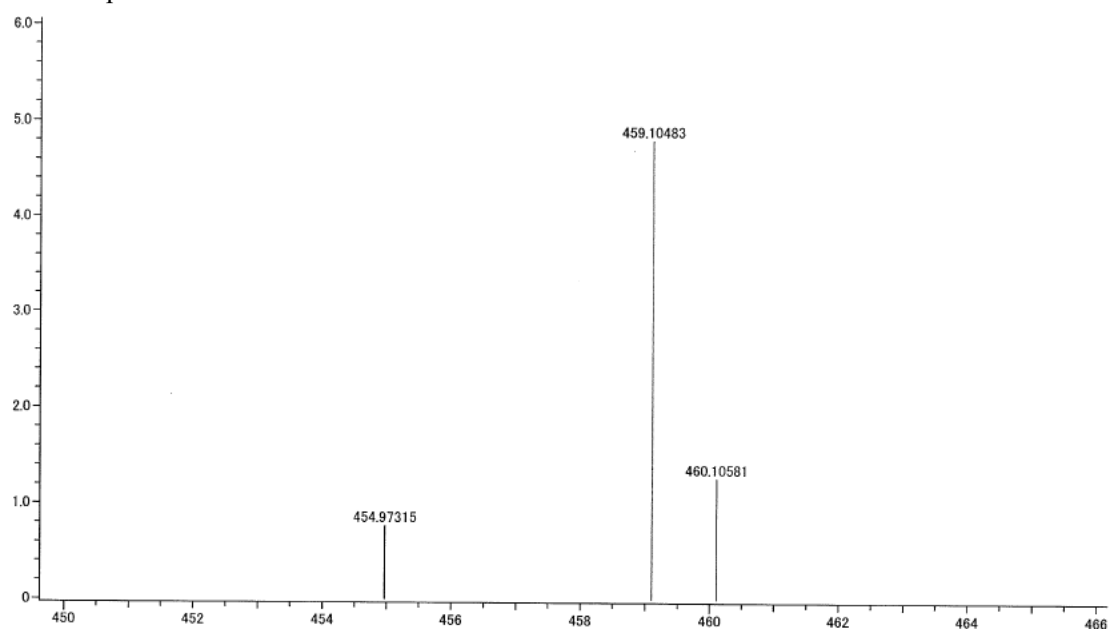

$^1\text{H}$ -NMR spectrum of **2g** ( $\text{CDCl}_3$ , 600 MHz)

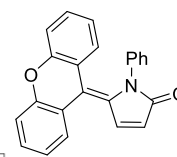

**2g**

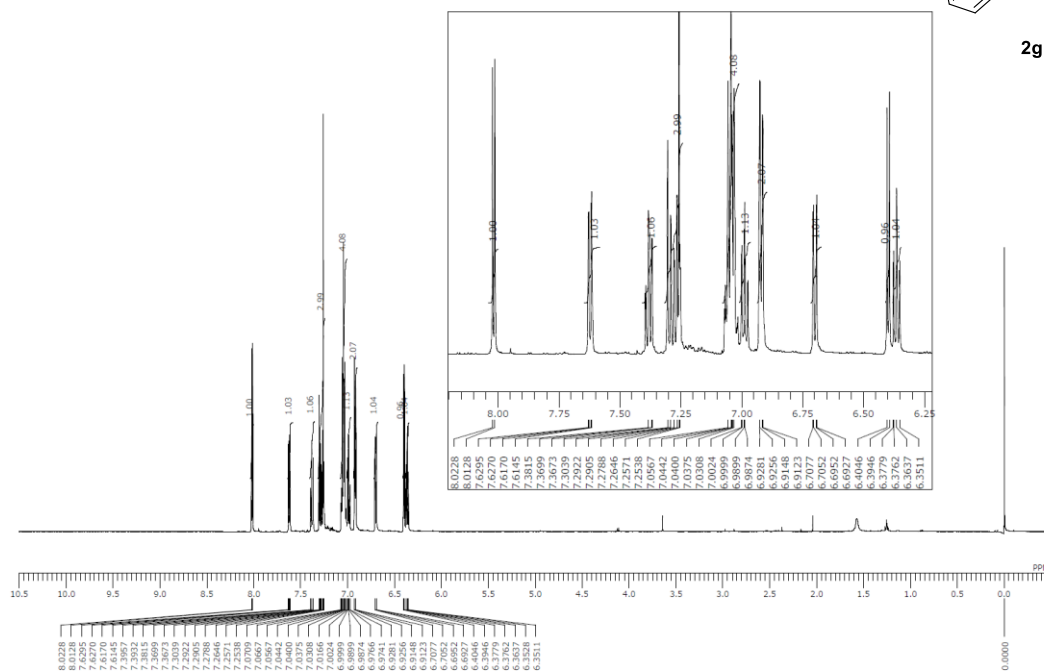

$^{13}\text{C}$ -NMR spectrum of **2g** ( $\text{CDCl}_3$ , 150 MHz)

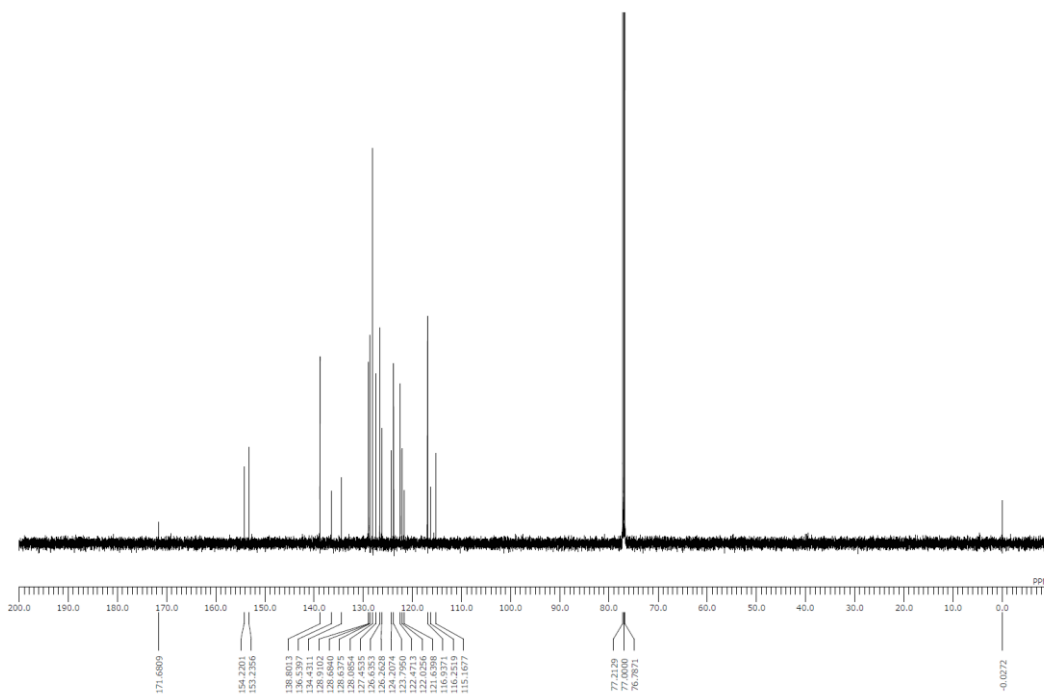

IR spectrum of **2g**

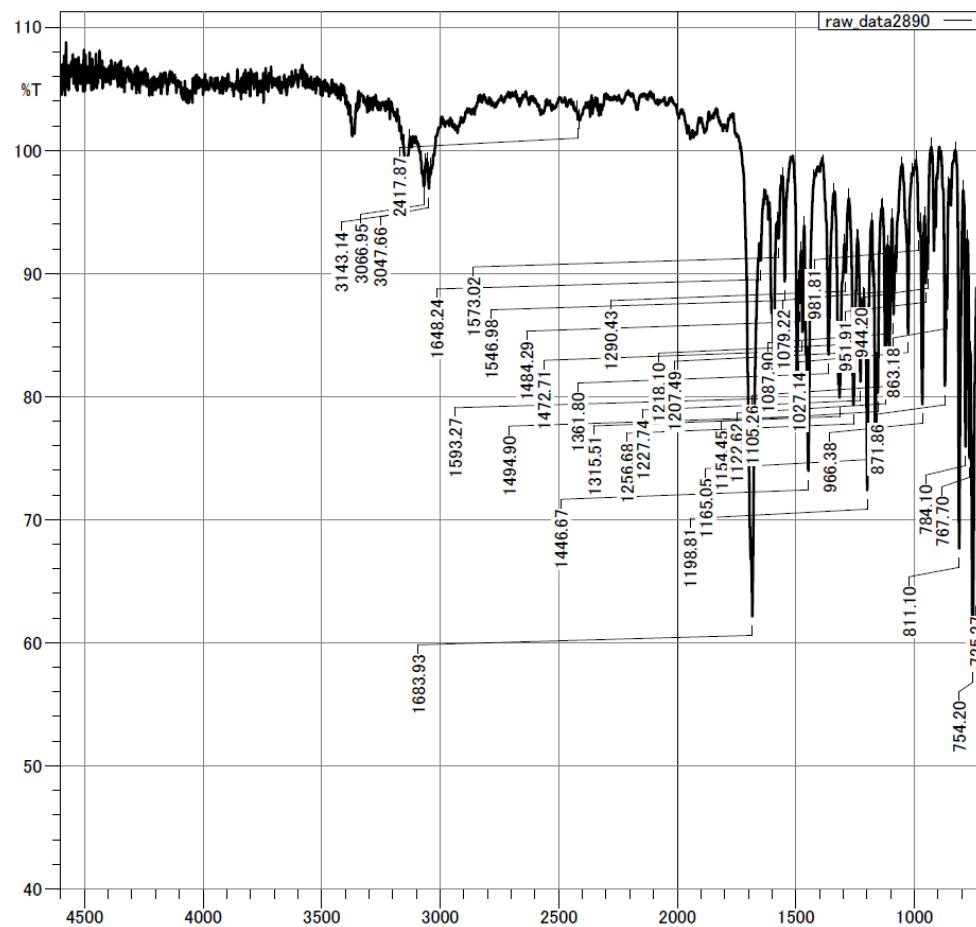

HRMS spectrum of **2g**

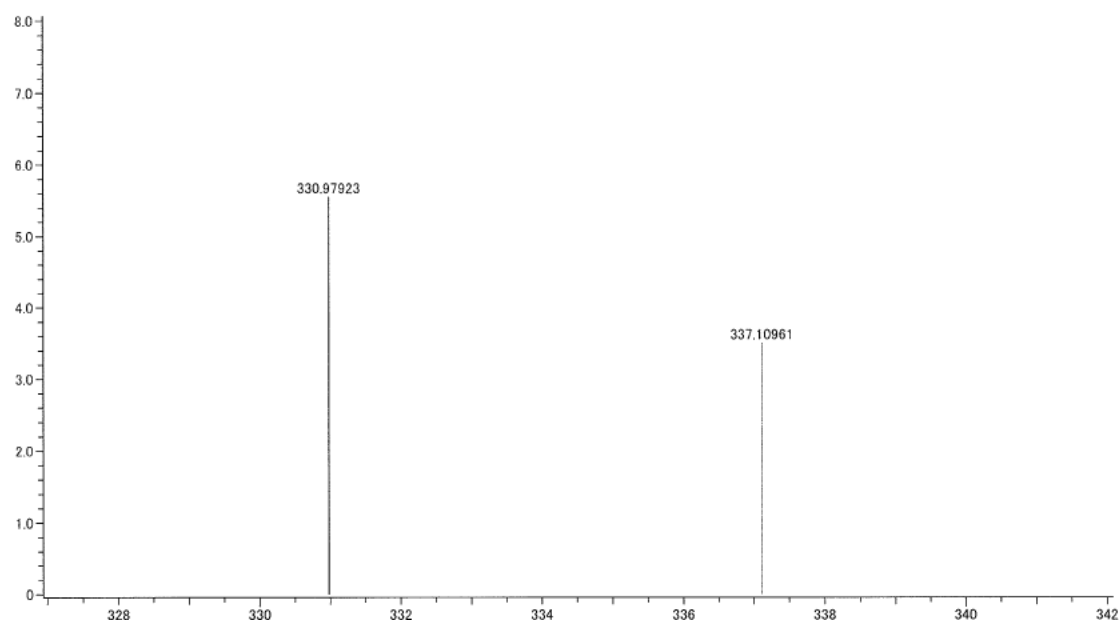

c1ccc2c(c1)c3ccccc3c2C=C4C=CC(=O)N(C4)c5ccccc5

2h

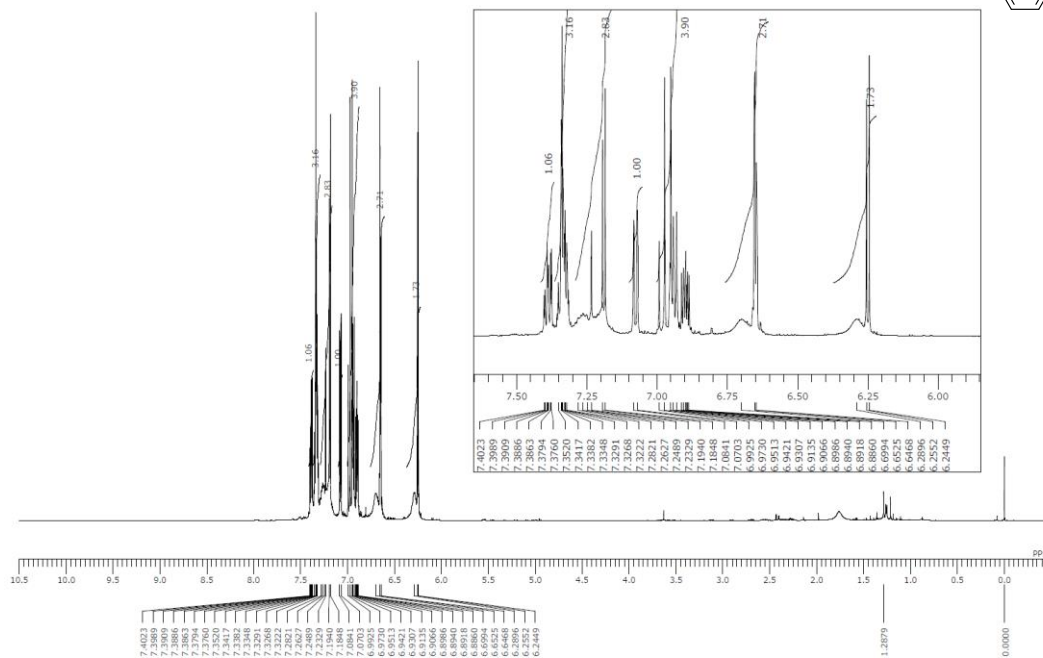



IR spectrum of **2h**

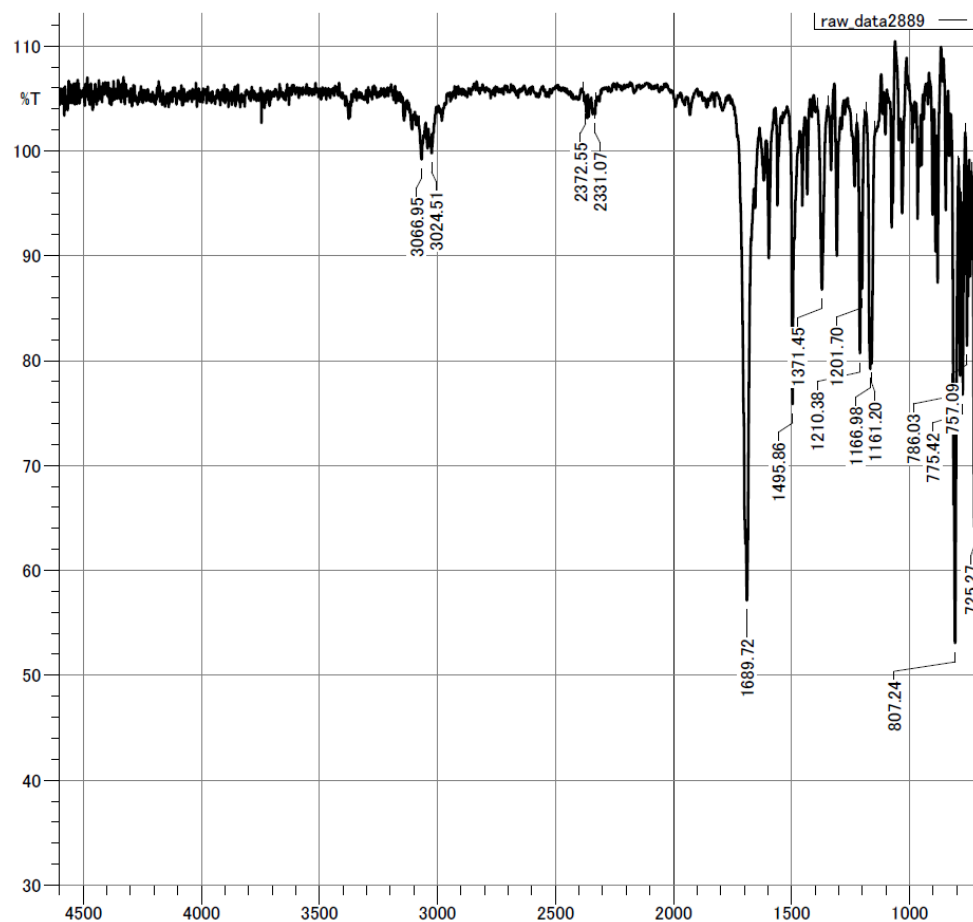

HRMS spectrum of **2h**

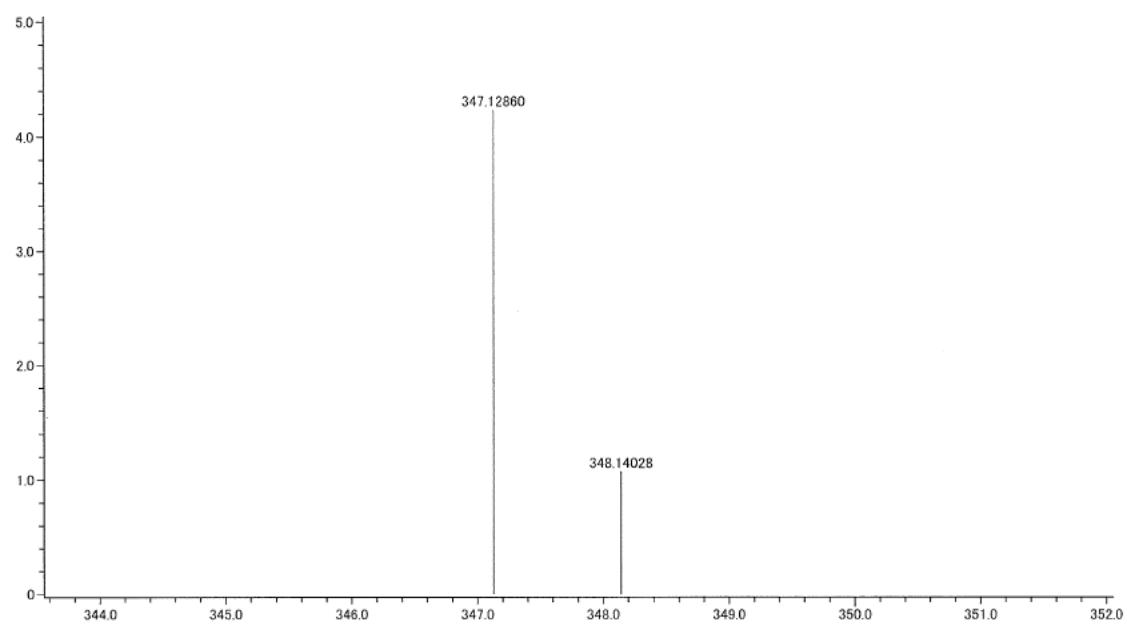

COc1ccc(cc1)N2C(=O)C=C(C2C3=CC=CC=C3)C4=CC=CC=C4

**2i**

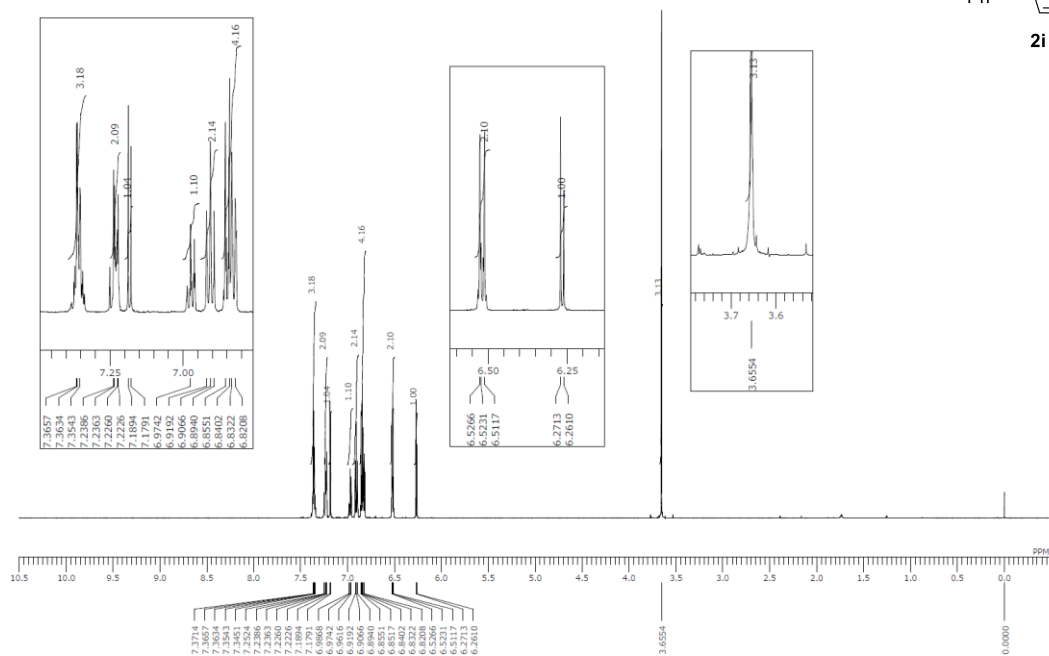

Mass spectrum of compound 296d. The x-axis represents the mass-to-charge ratio (m/z) from 200.0 to 0.0, and the y-axis represents relative intensity from 0.0 to 200.0. The base peak is at m/z 130.0. Other significant peaks are labeled with their m/z values.

| m/z      | Relative Intensity (approx.) |
|----------|------------------------------|
| 172.0101 | 10                           |
| 157.6077 | 15                           |
| 140.6361 | 10                           |
| 139.9294 | 10                           |
| 138.2568 | 10                           |
| 137.8968 | 10                           |
| 131.6108 | 10                           |
| 130.6270 | 10                           |
| 128.7933 | 10                           |
| 128.0102 | 10                           |
| 127.7776 | 10                           |
| 127.1506 | 10                           |
| 121.7258 | 10                           |
| 113.4672 | 10                           |
| 77.2101  | 10                           |
| 77.0000  | 10                           |
| 76.0603  | 10                           |
| 55.3486  | 10                           |
| -0.0644  | 10                           |

IR spectrum of **2i**

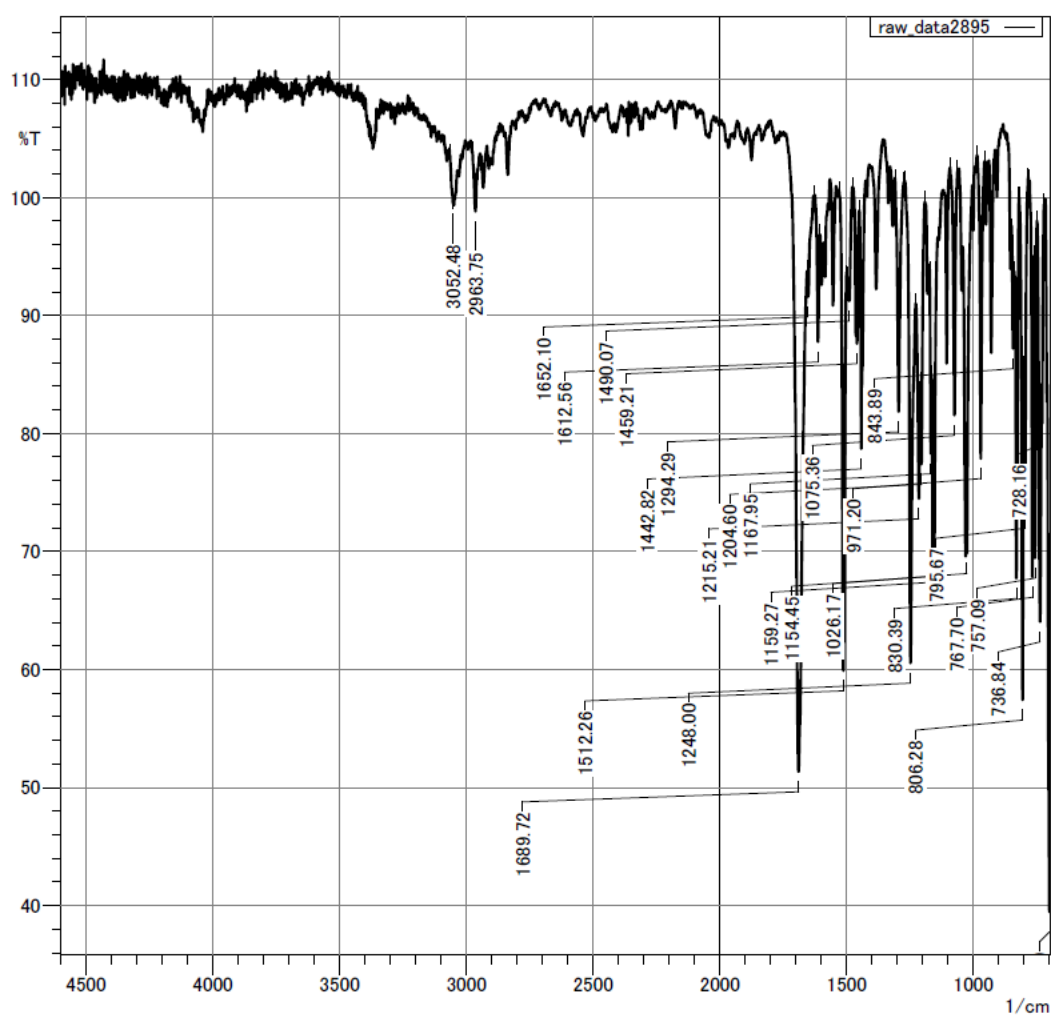

HRMS spectrum of **2i**

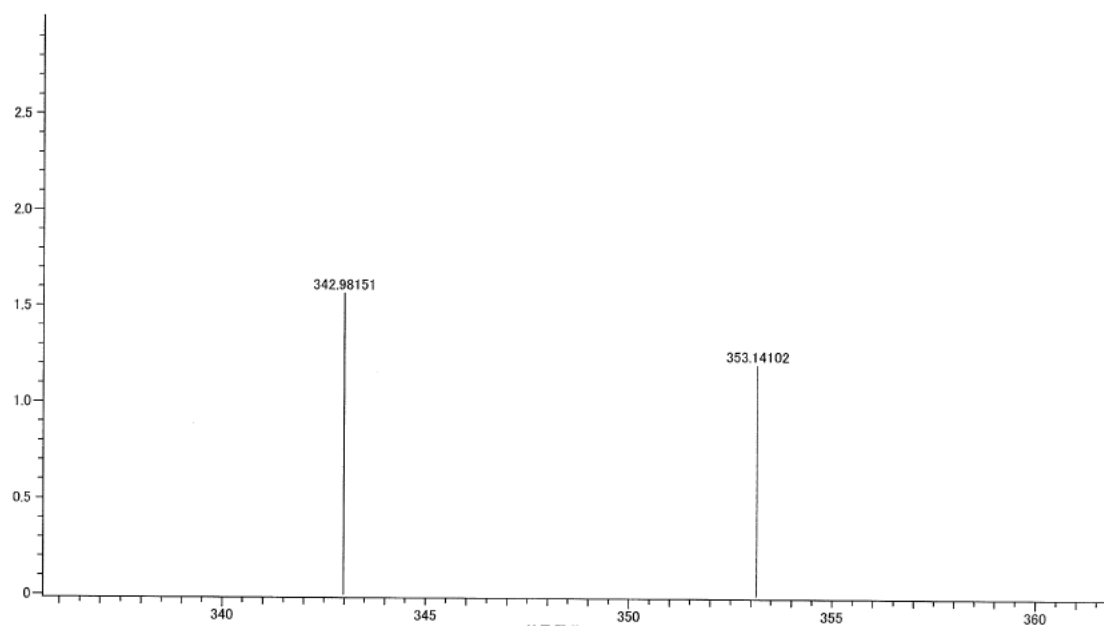

$^1\text{H}$ -NMR spectrum of **2j** ( $\text{CDCl}_3$ , 600 MHz)

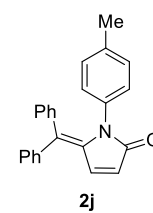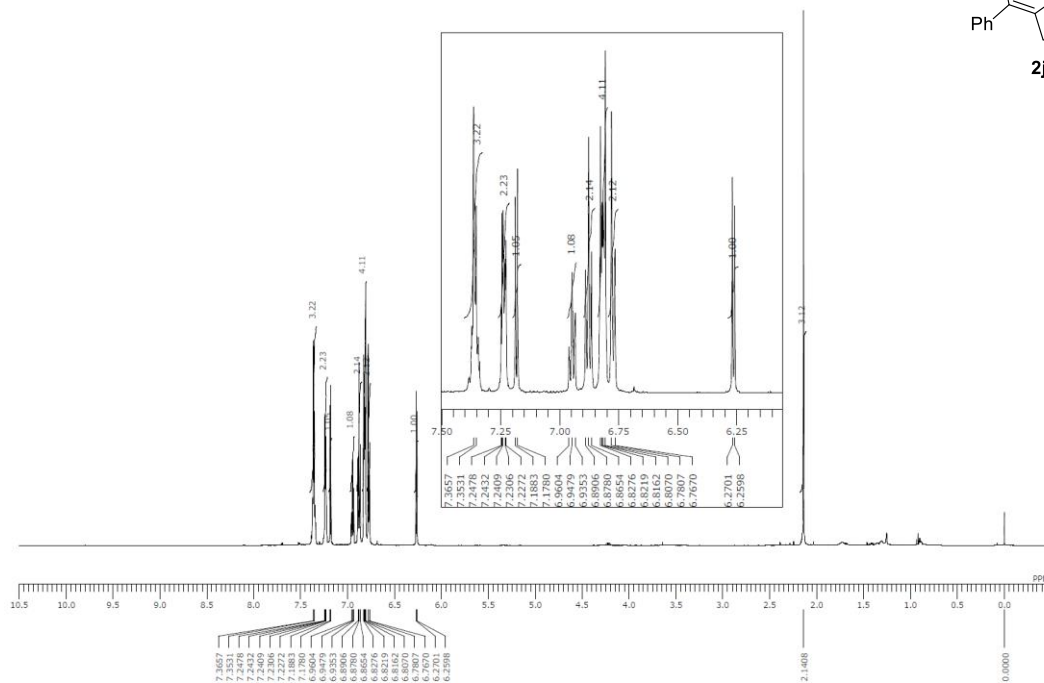

$^{13}\text{C}$ -NMR spectrum of **2j** ( $\text{CDCl}_3$ , 150 MHz)

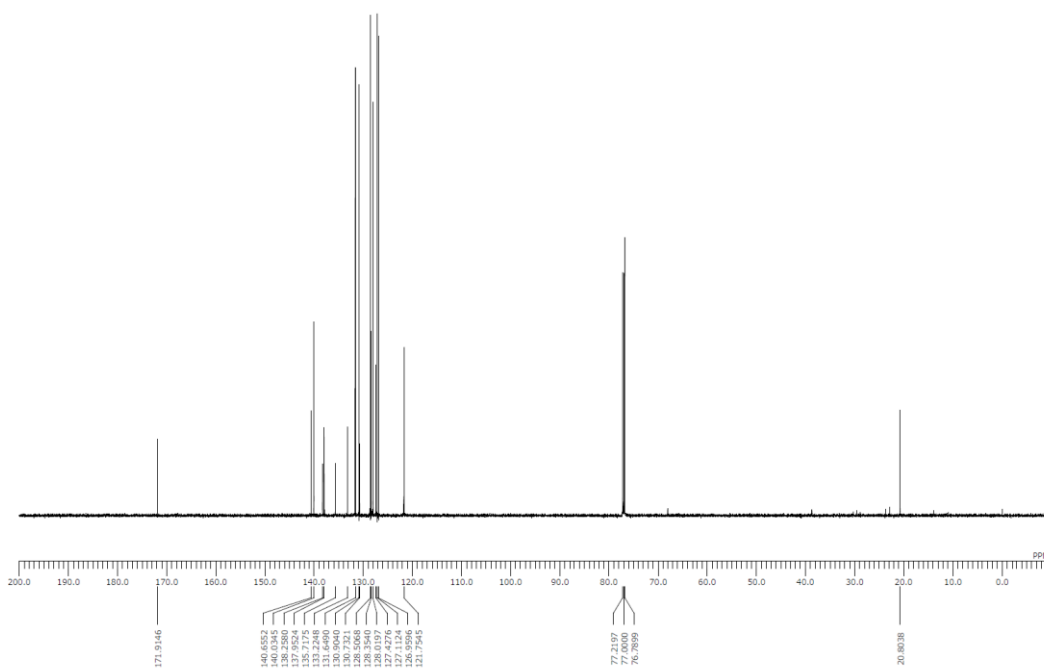

IR spectrum of **2j**

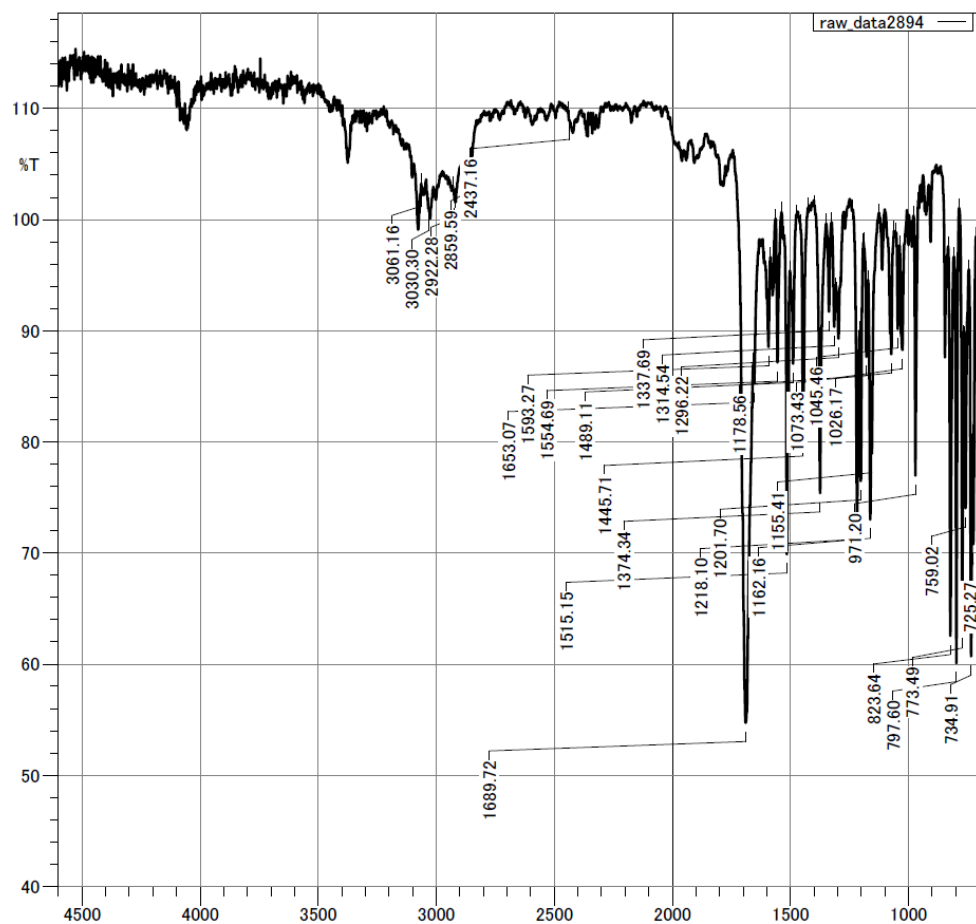

HRMS spectrum of **2j**

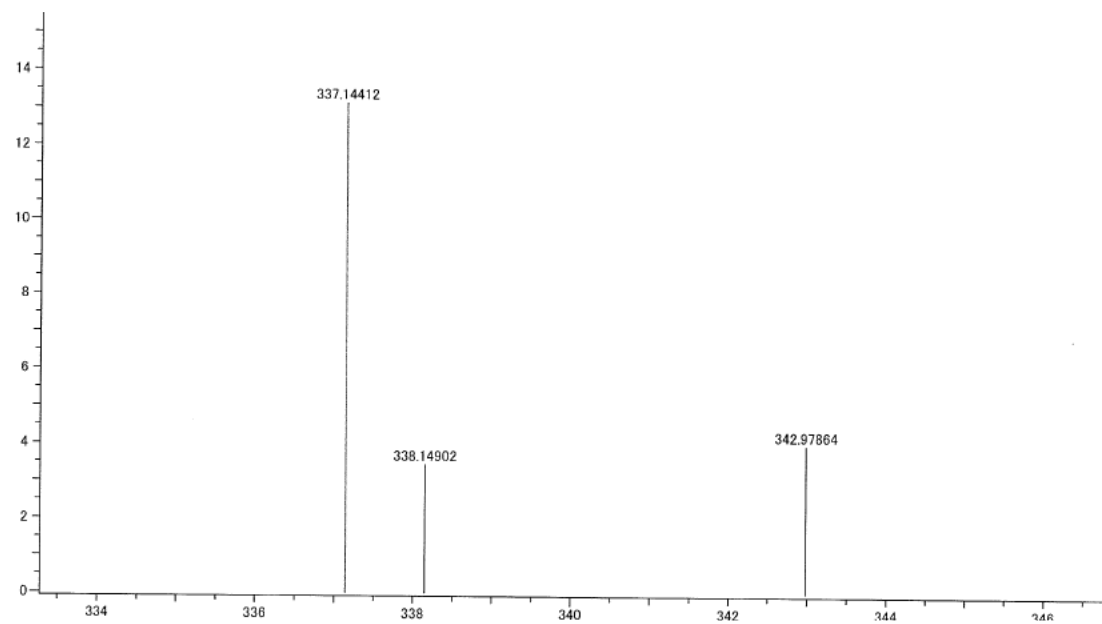

$^1\text{H}$ -NMR spectrum of **2k** ( $\text{CDCl}_3$ , 600 MHz)

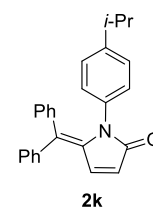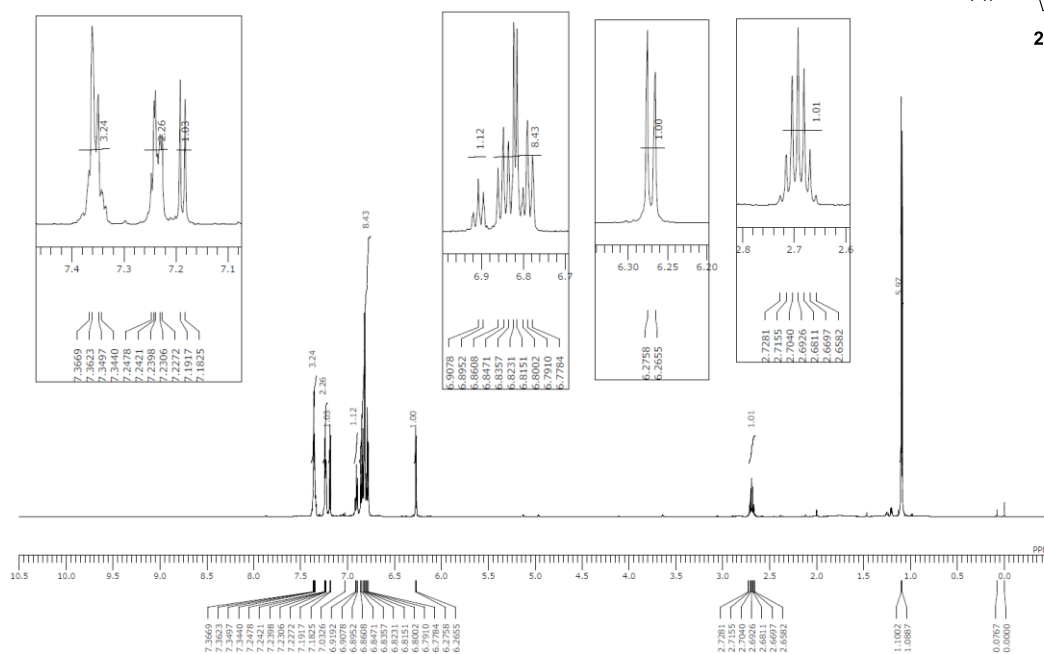

$^{13}\text{C}$ -NMR spectrum of **2k** ( $\text{CDCl}_3$ , 150 MHz)

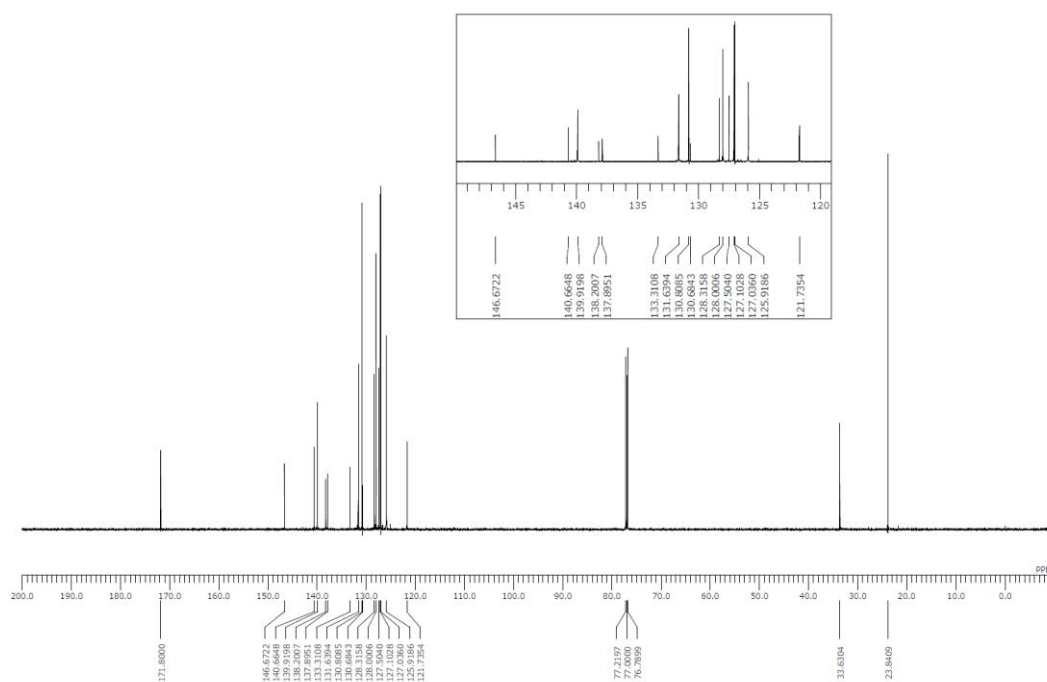

IR spectrum of **2k**

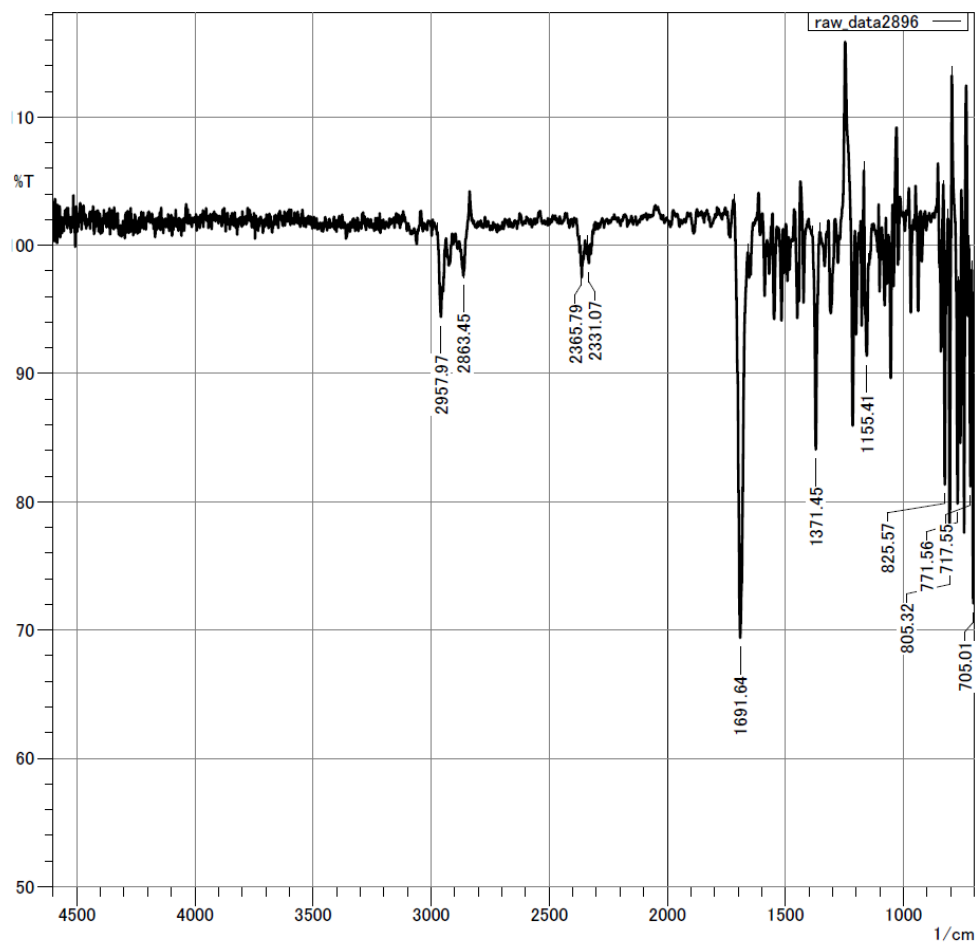

HRMS spectrum of **2k**

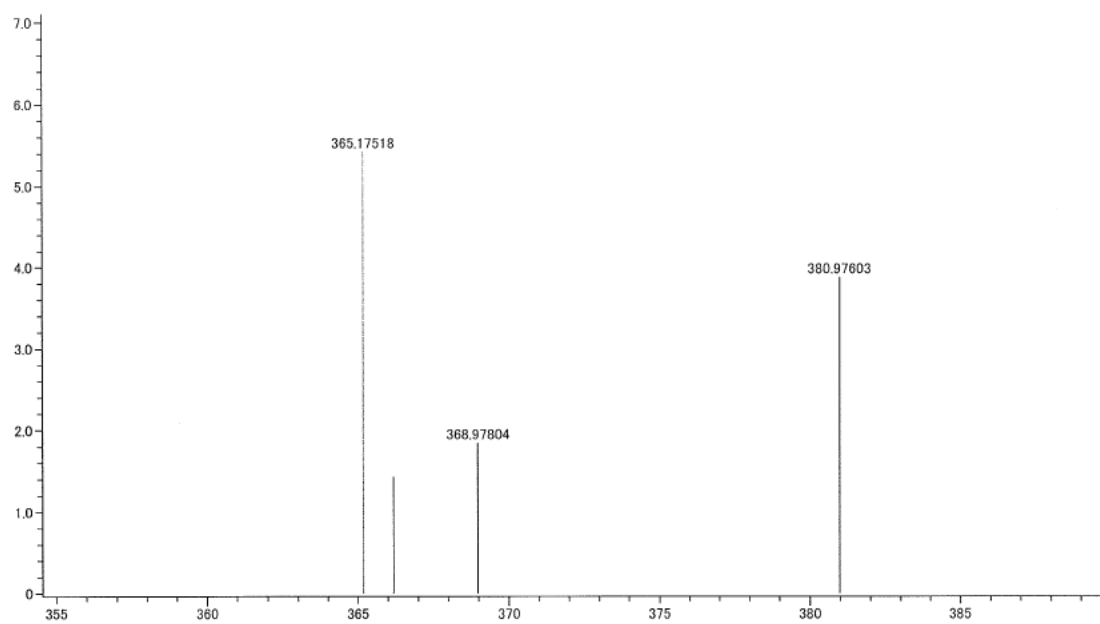

$^1\text{H}$ -NMR spectrum of **21** ( $\text{CDCl}_3$ , 600 MHz)

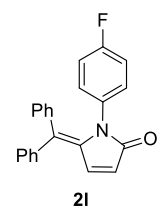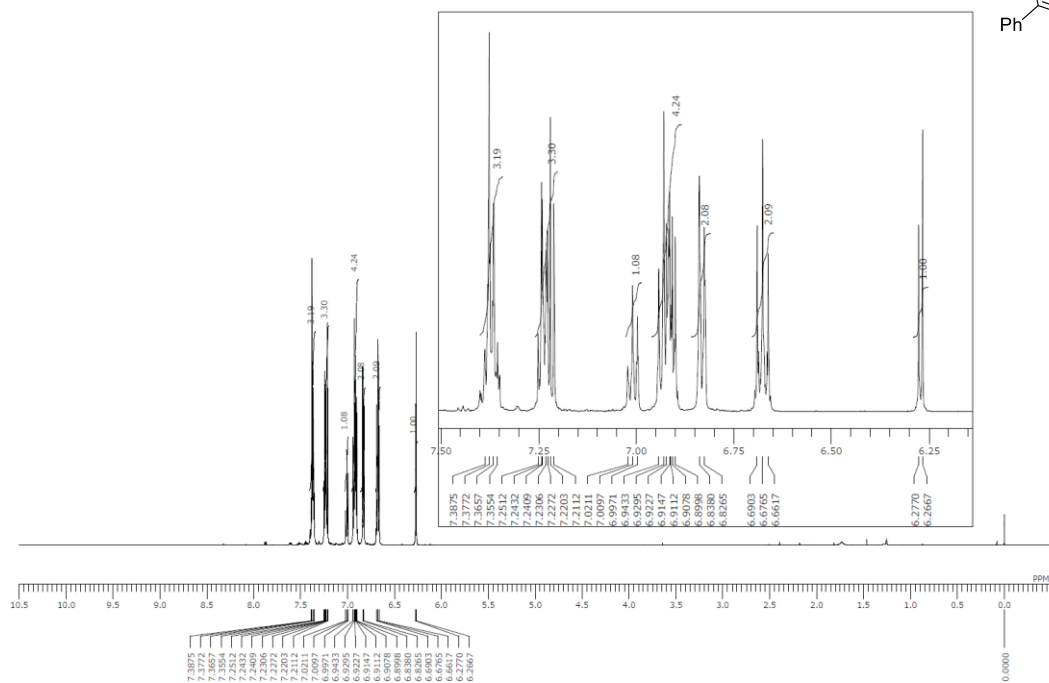

$^{13}\text{C}$ -NMR spectrum of **21** ( $\text{CDCl}_3$ , 150 MHz)

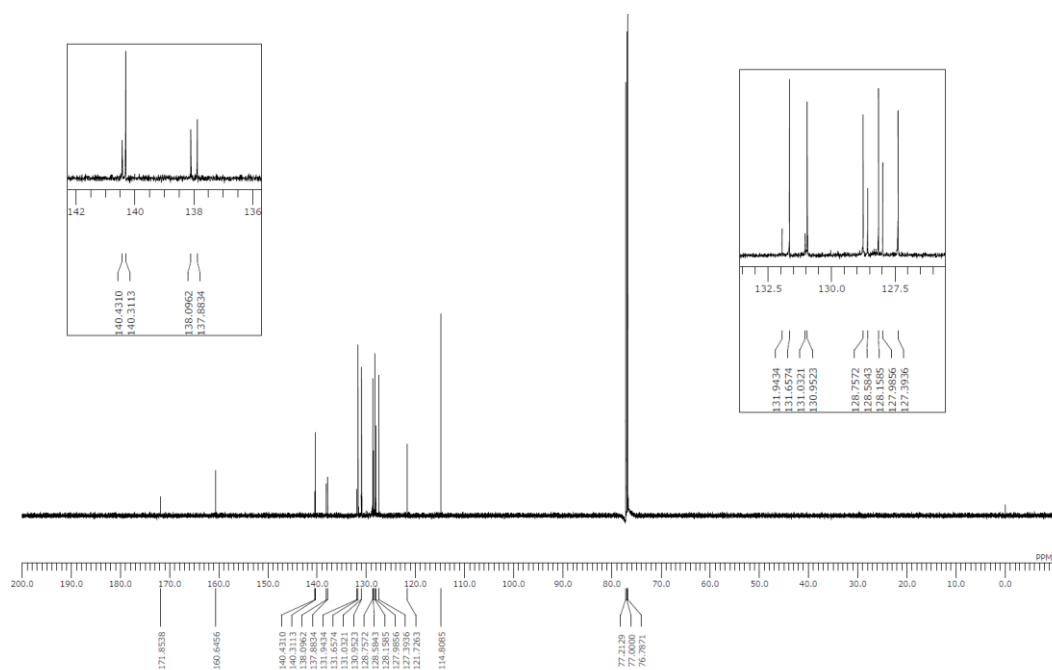



$^{19}\text{F}$ -NMR spectrum of **21** ( $\text{CDCl}_3$ , 565 MHz)

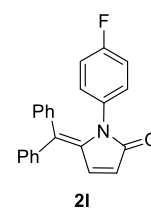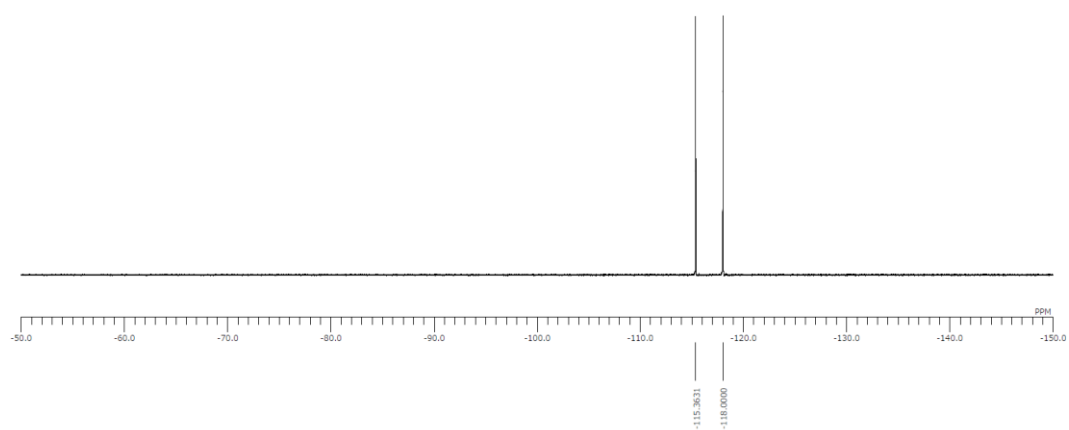

IR spectrum of **2l**

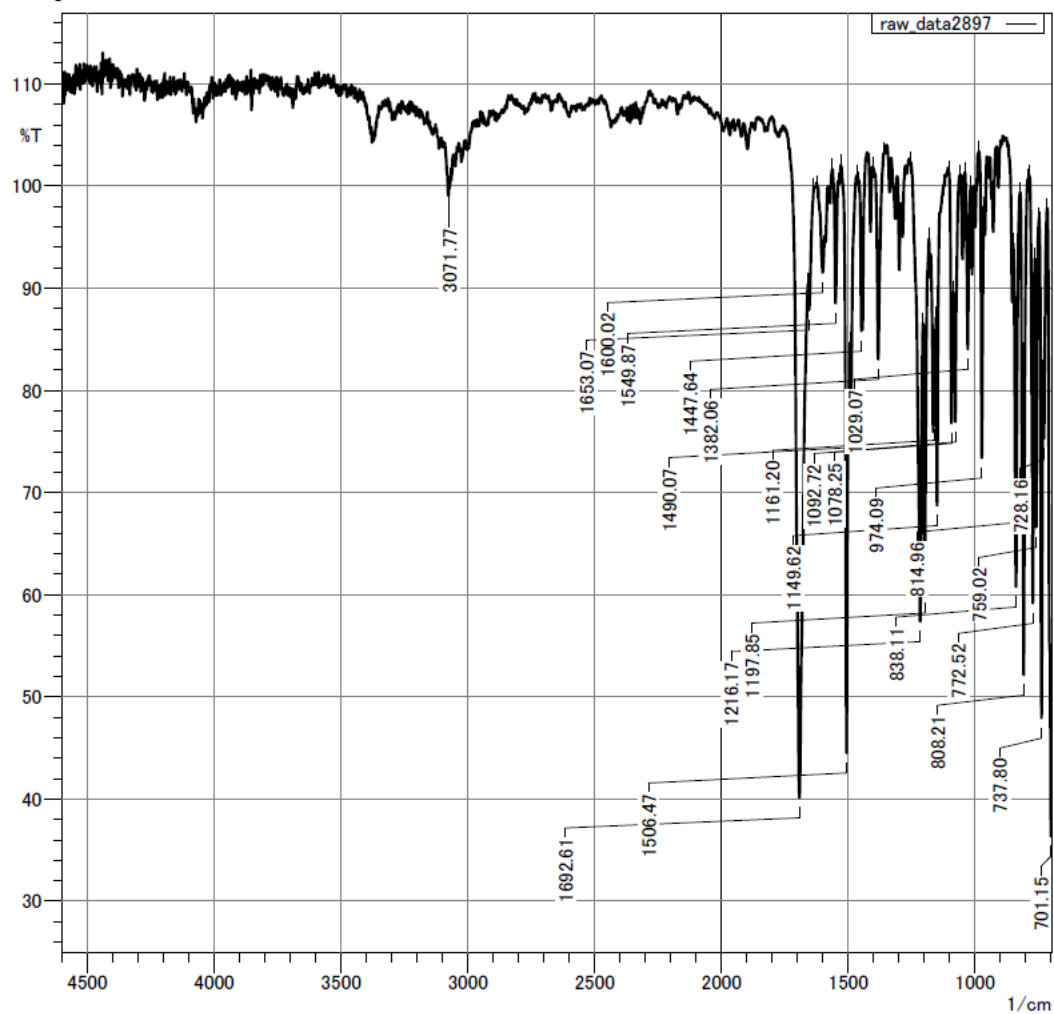

HRMS spectrum of **2l**

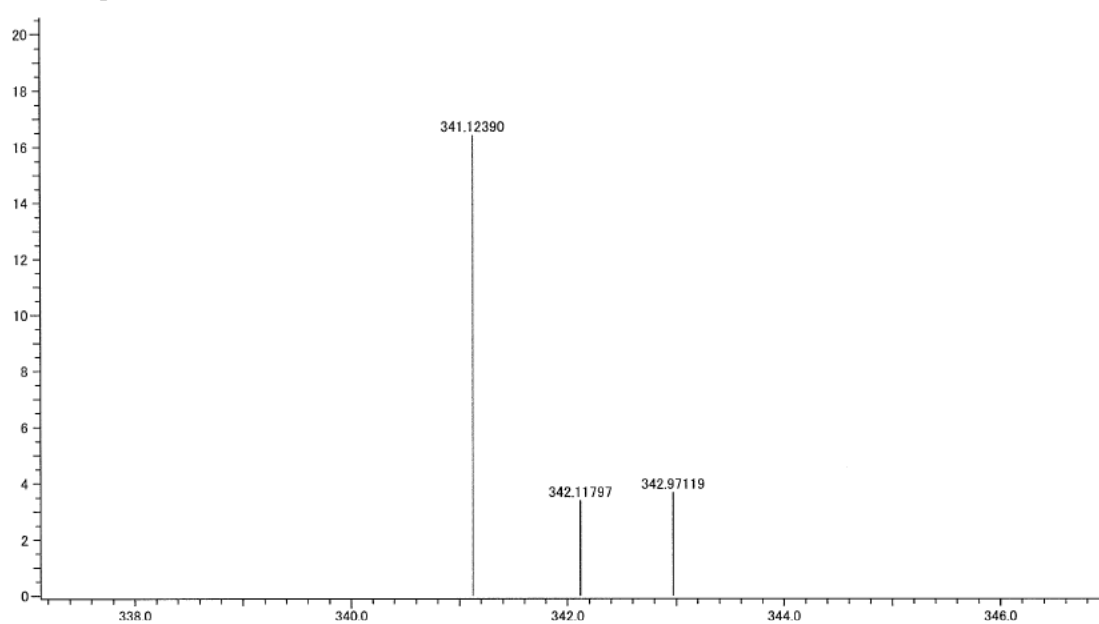

$^1\text{H}$ -NMR spectrum of **2m** ( $\text{CDCl}_3$ , 600 MHz)

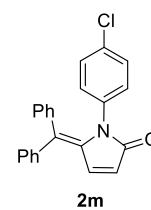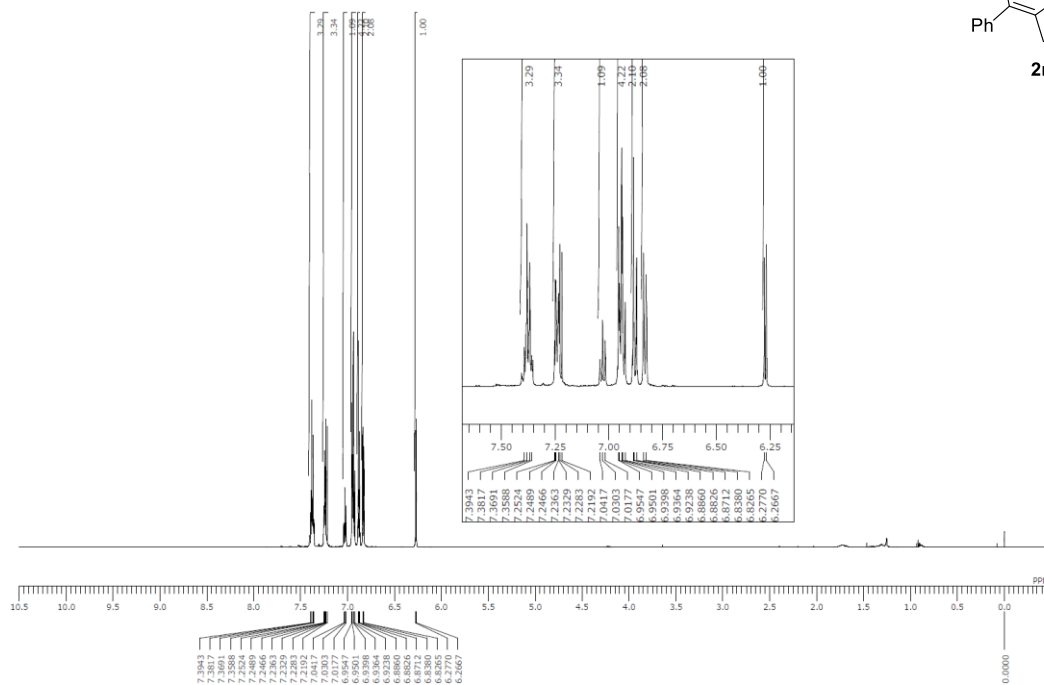

$^{13}\text{C}$ -NMR spectrum of **2m** ( $\text{CDCl}_3$ , 150 MHz)

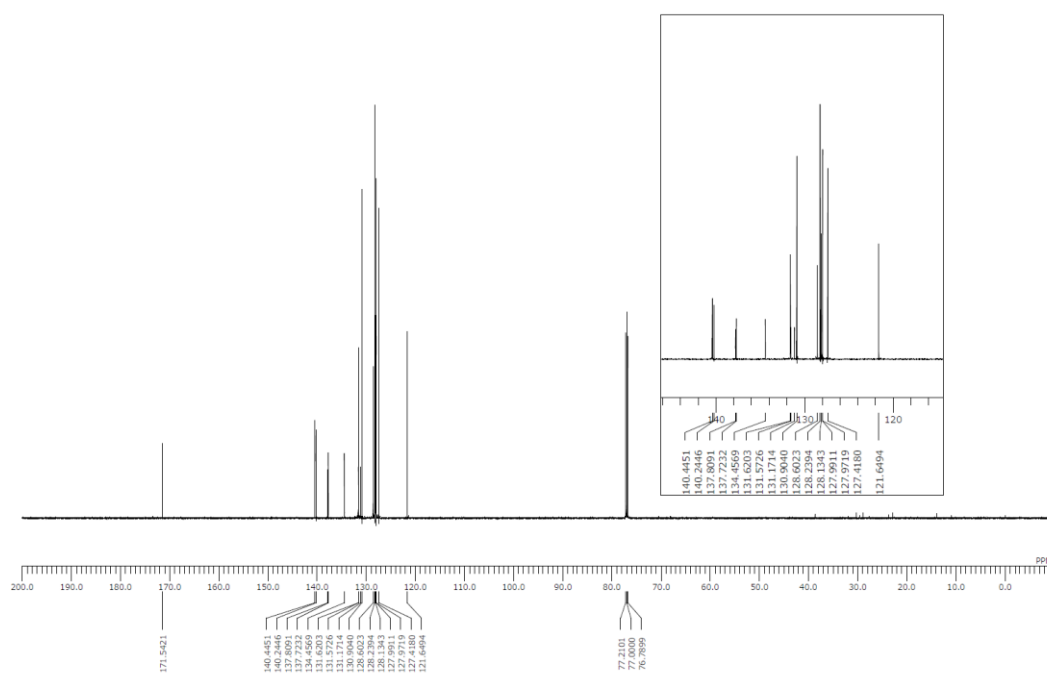

IR spectrum of **2m**

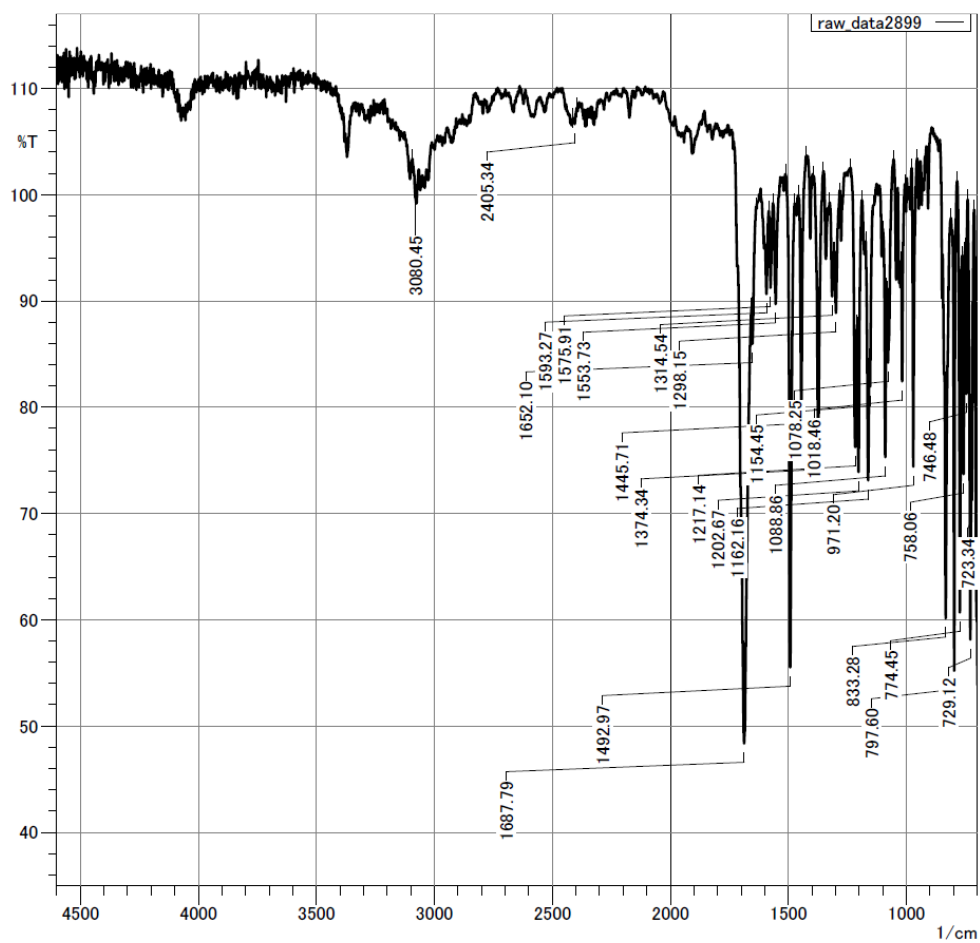

HRMS spectrum of **2m**

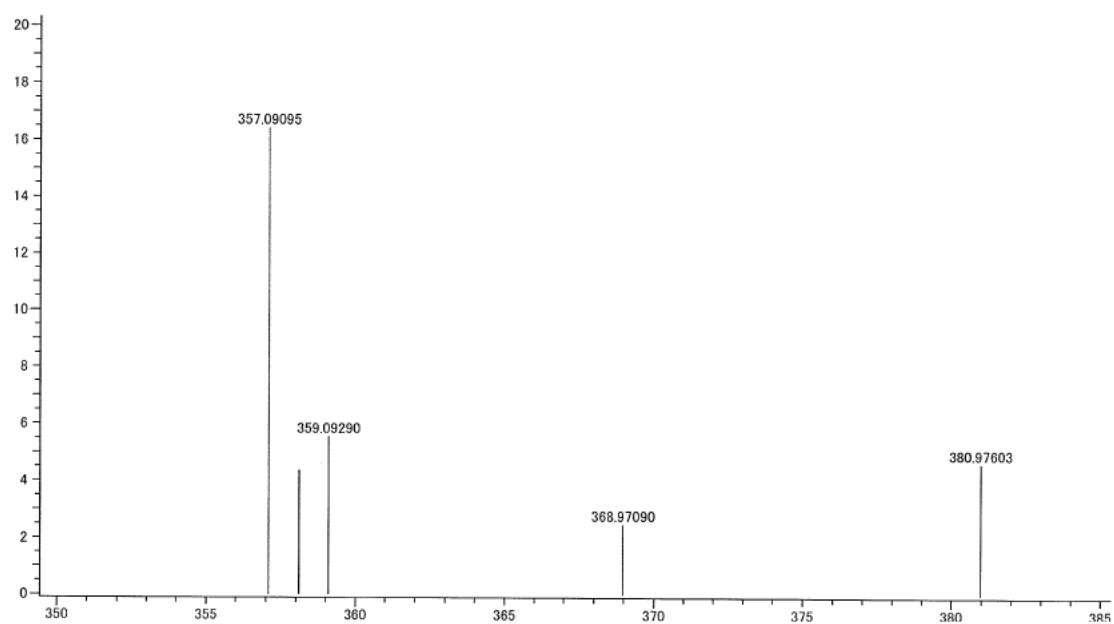

$^1\text{H}$ -NMR spectrum of **2n** ( $\text{CDCl}_3$ , 600 MHz)

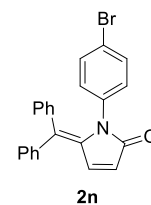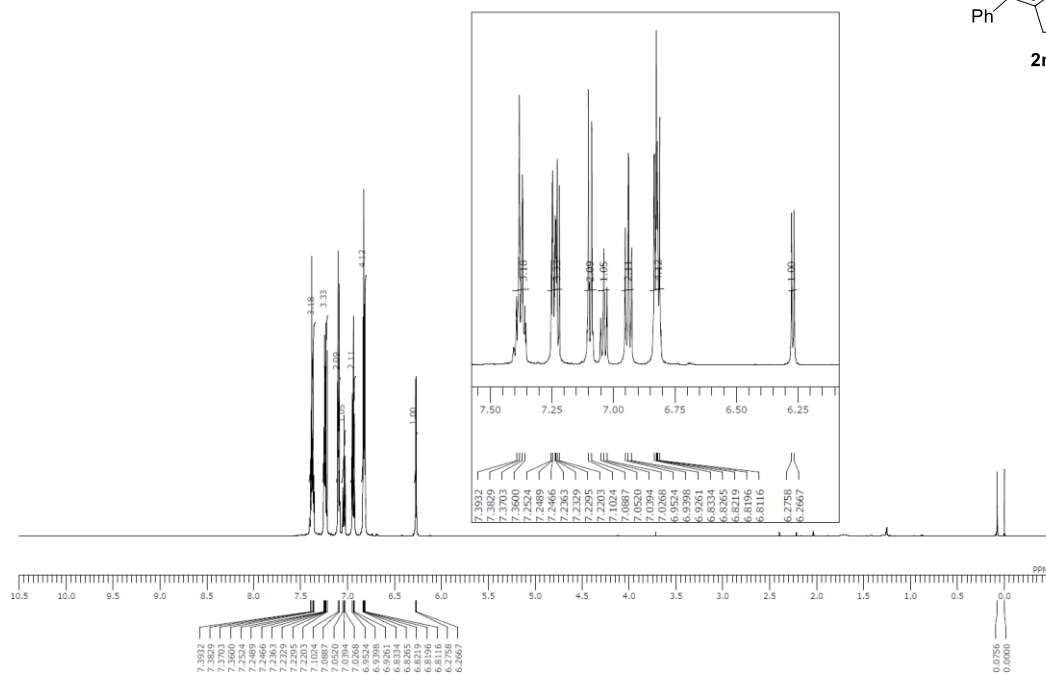

$^{13}\text{C}$ -NMR spectrum of **2n** ( $\text{CDCl}_3$ , 150 MHz)

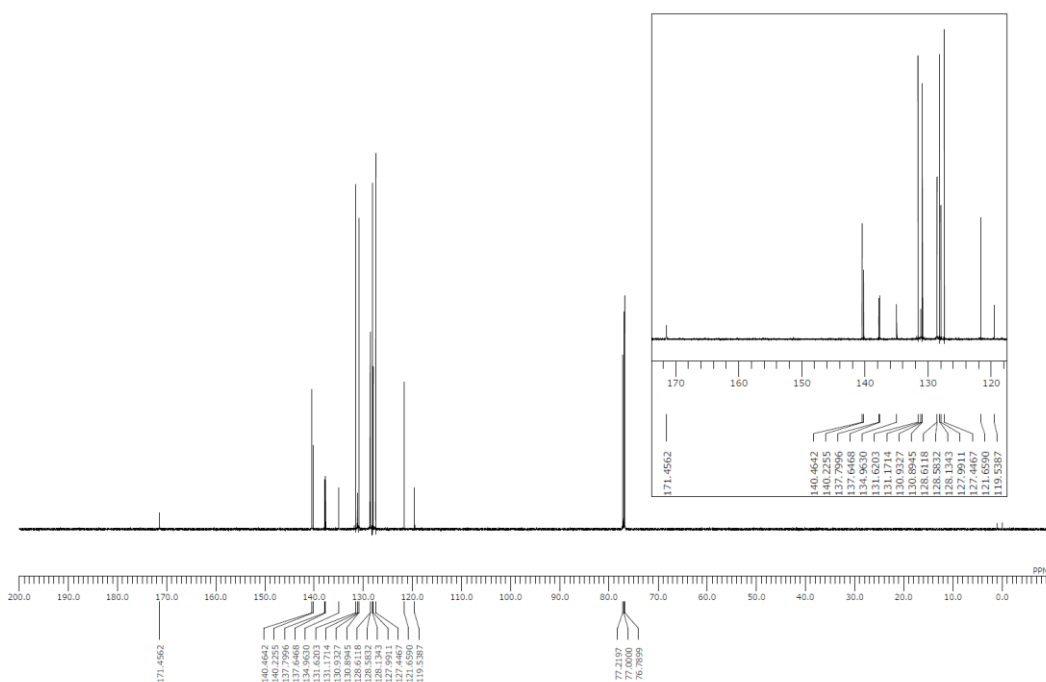

IR spectrum of **2n**

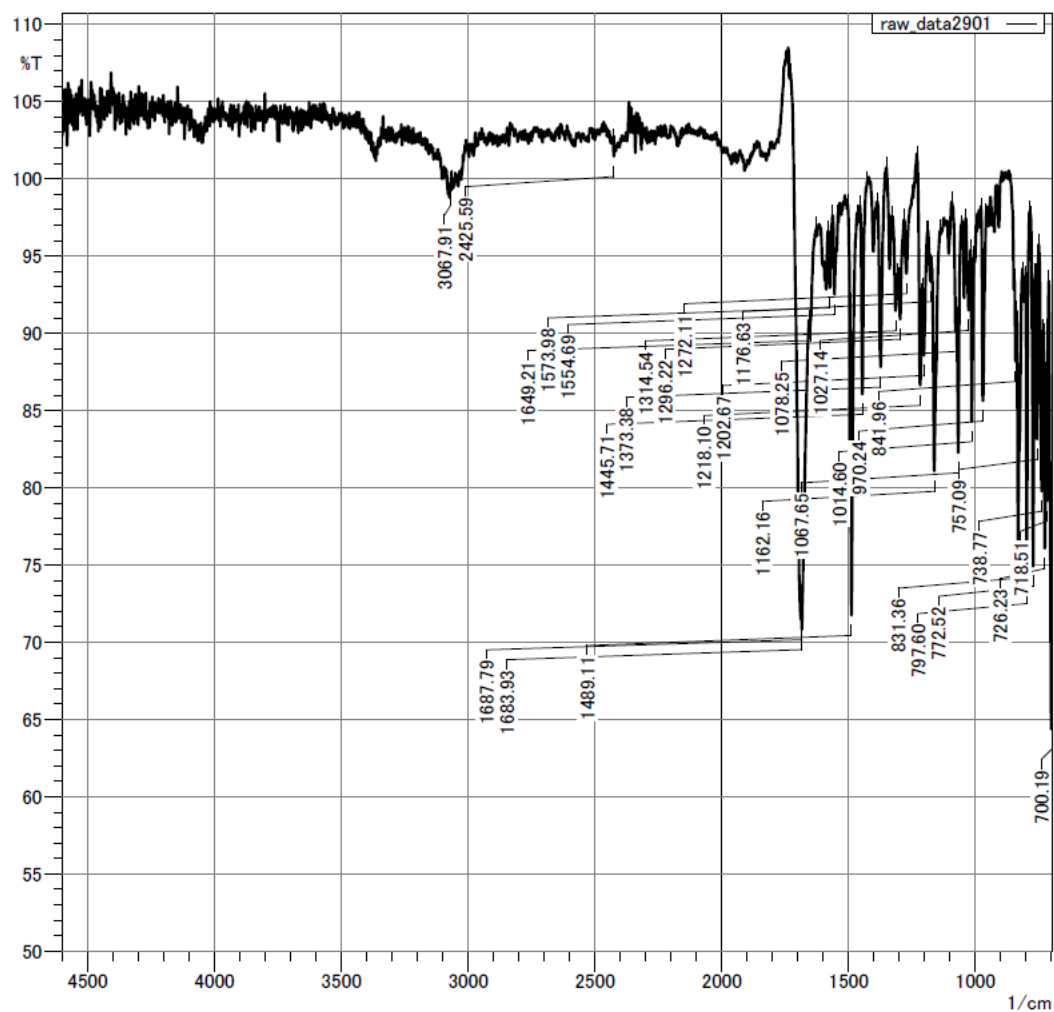

HRMS spectrum of **2n**

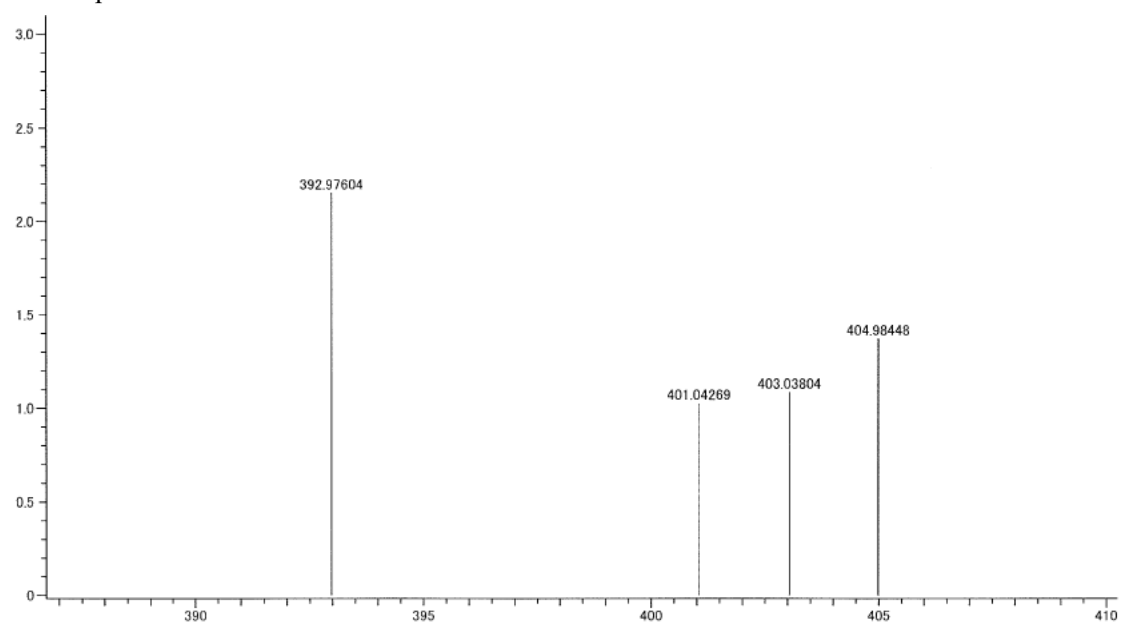

$^1\text{H}$ -NMR spectrum of **2o** ( $\text{CDCl}_3$ , 600 MHz)

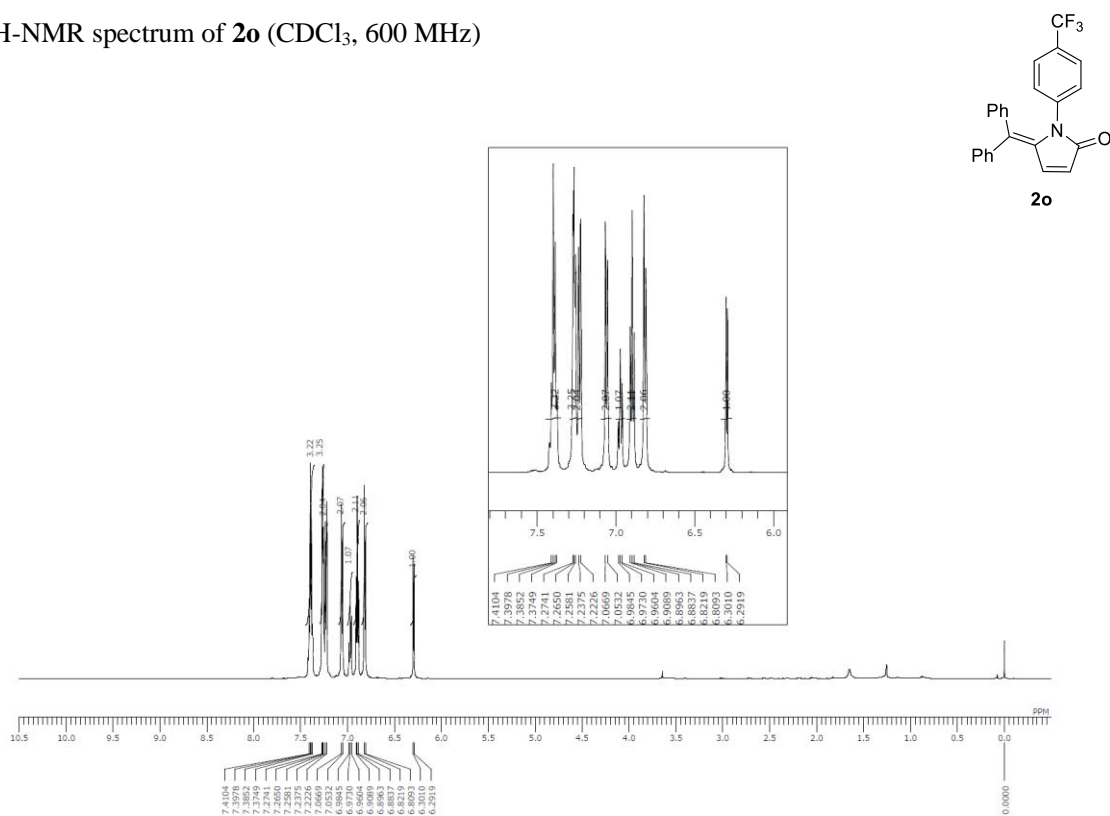

$^{13}\text{C}$ -NMR spectrum of **2o** ( $\text{CDCl}_3$ , 150 MHz)

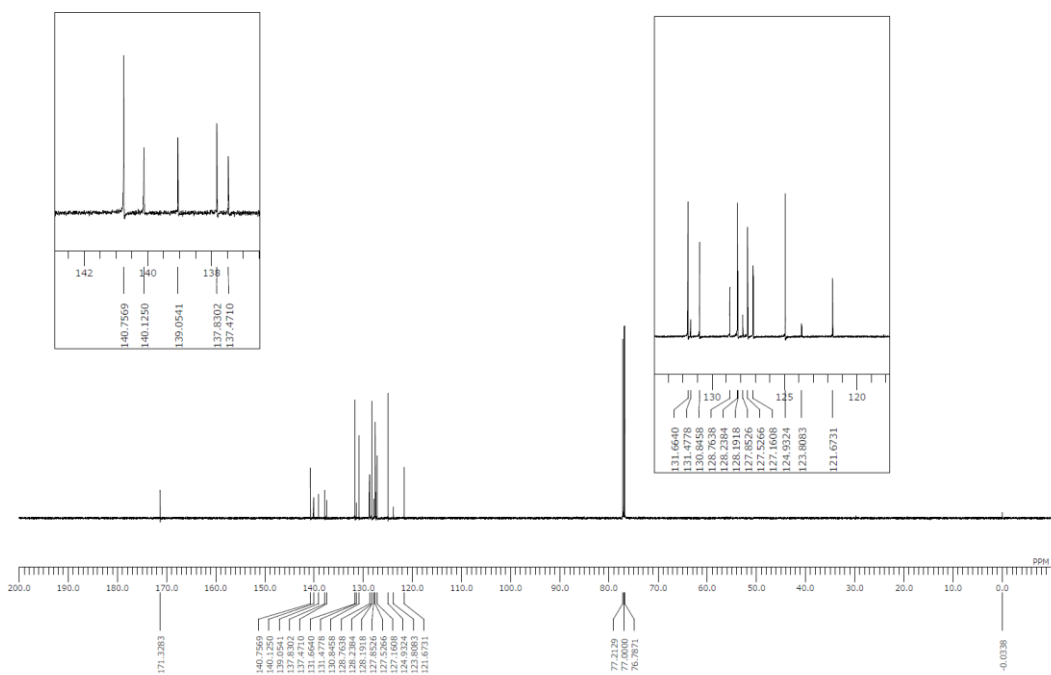

$^{19}\text{F}$ -NMR spectrum of **2o** ( $\text{CDCl}_3$ , 565 MHz)

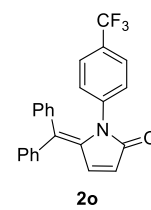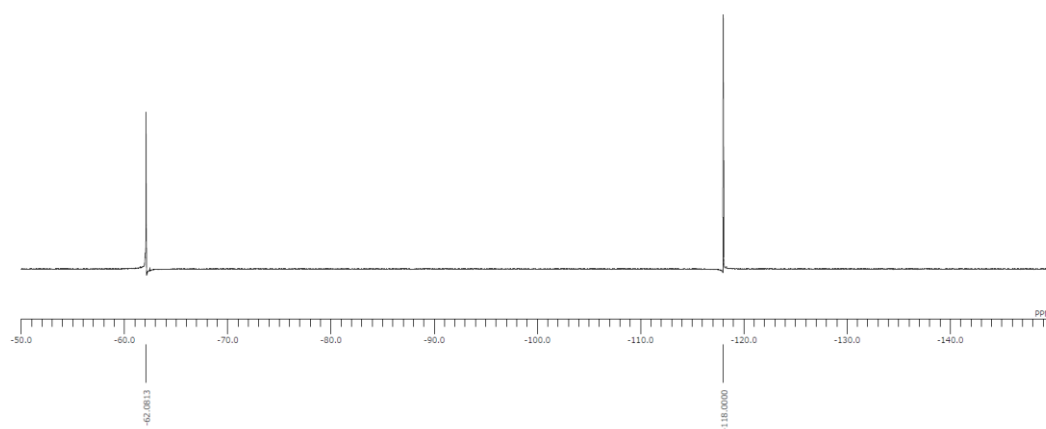



IR spectrum of **2o**

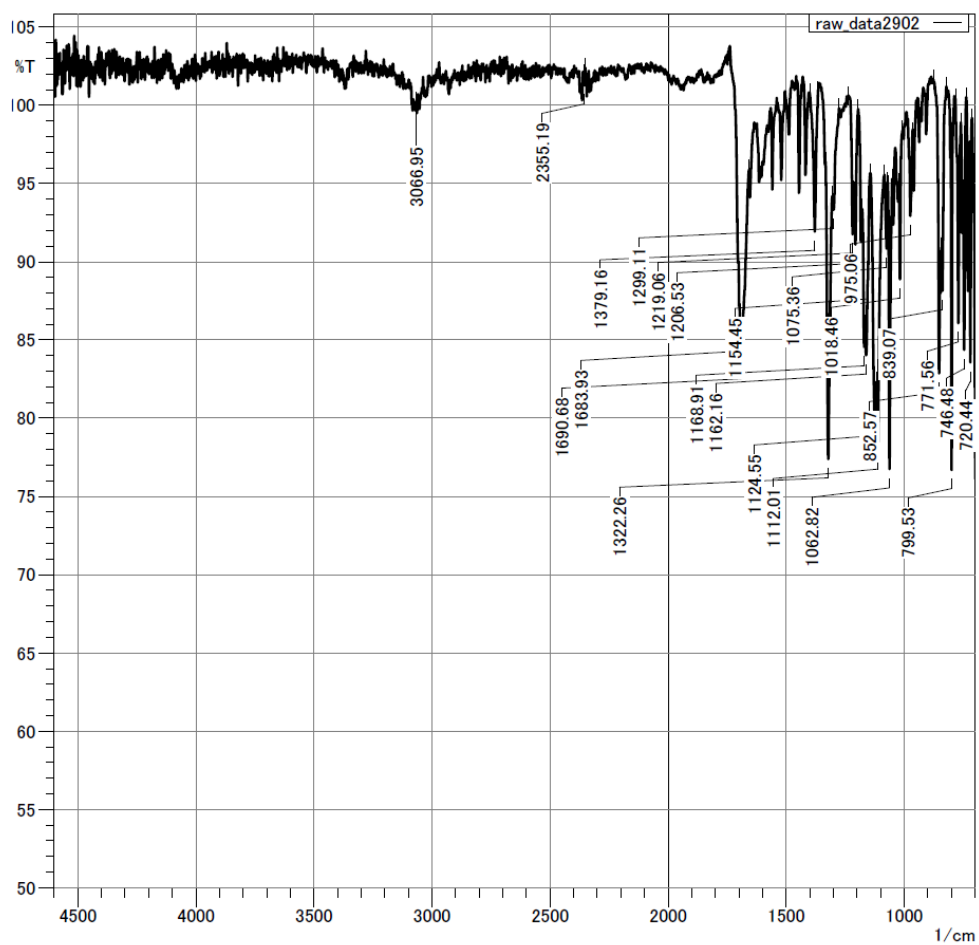

HRMS spectrum of **2o**

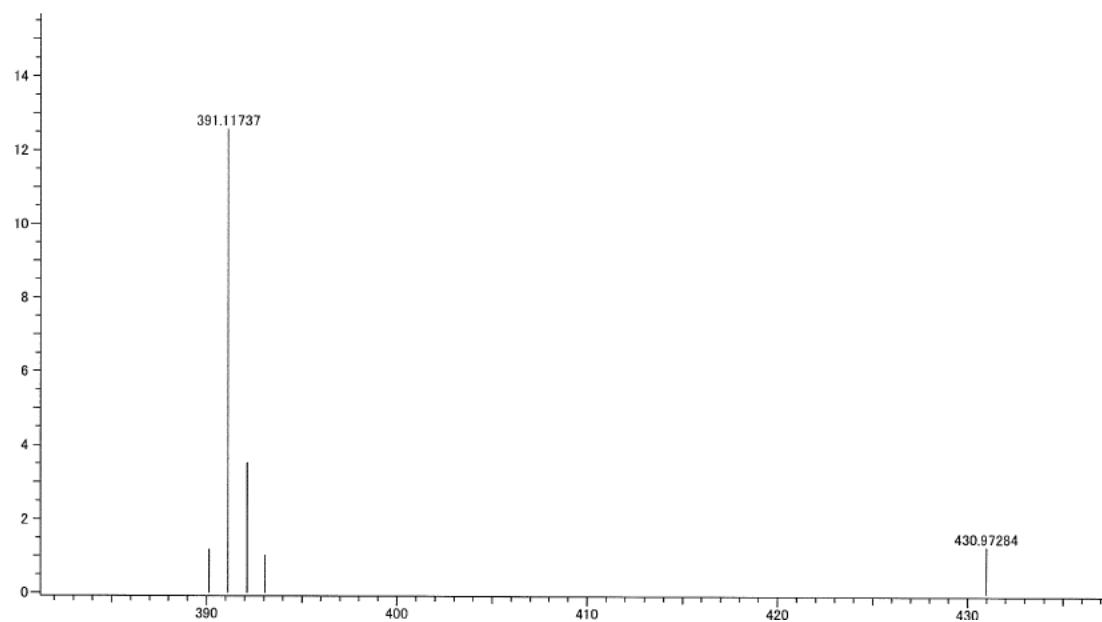

$^1\text{H}$ -NMR spectrum of **2p** ( $\text{CDCl}_3$ , 600 MHz)

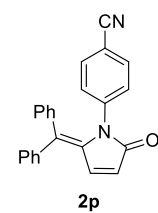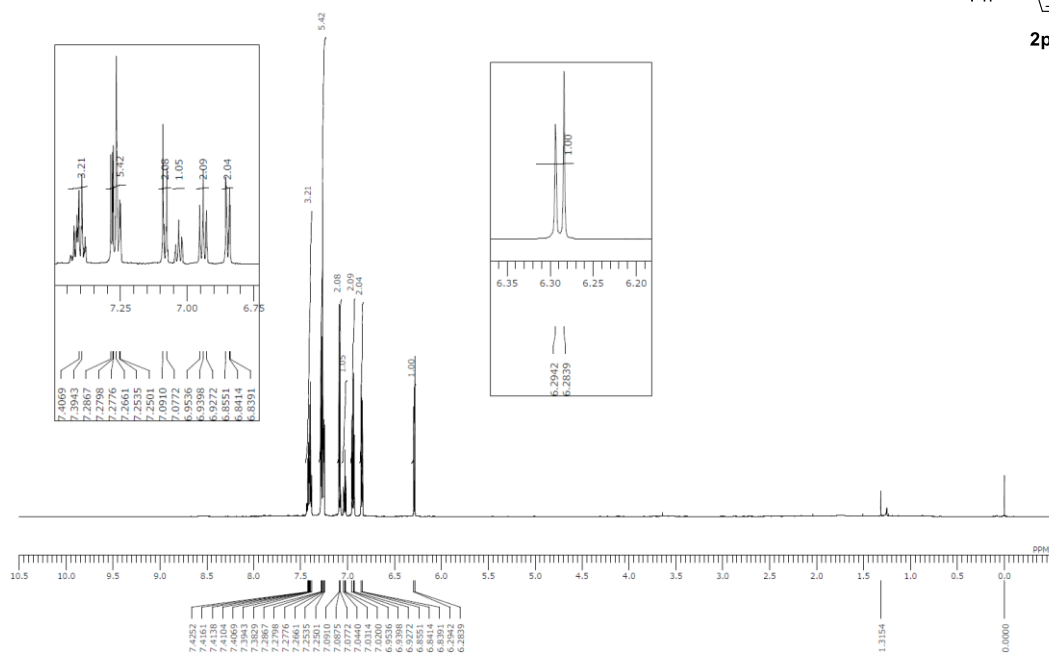

$^{13}\text{C}$ -NMR spectrum of **2p** ( $\text{CDCl}_3$ , 150 MHz)

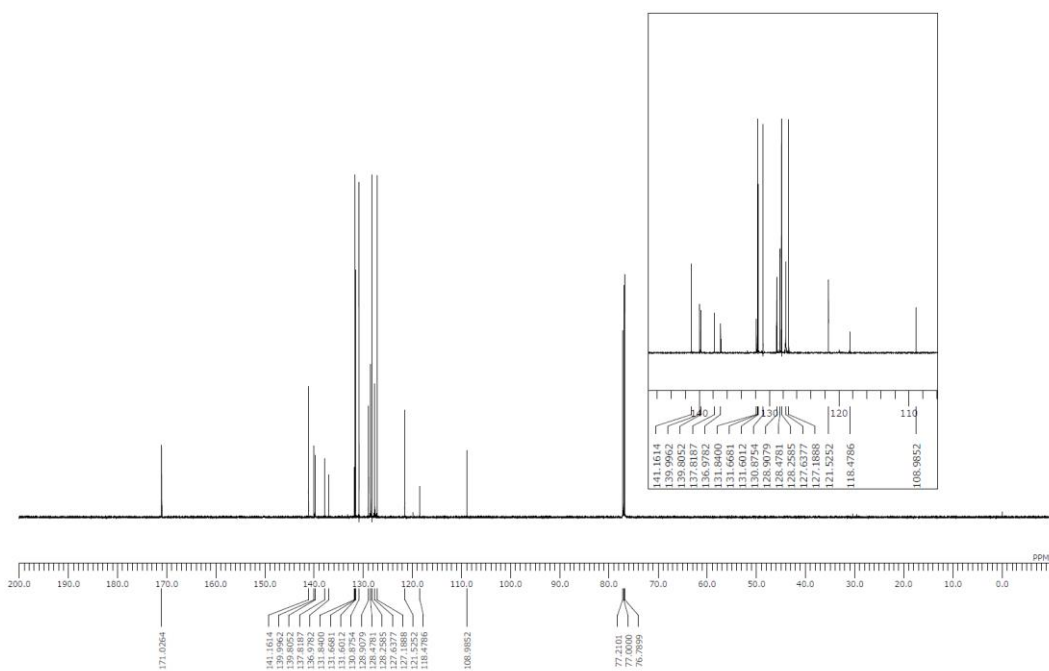

IR spectrum of **2p**

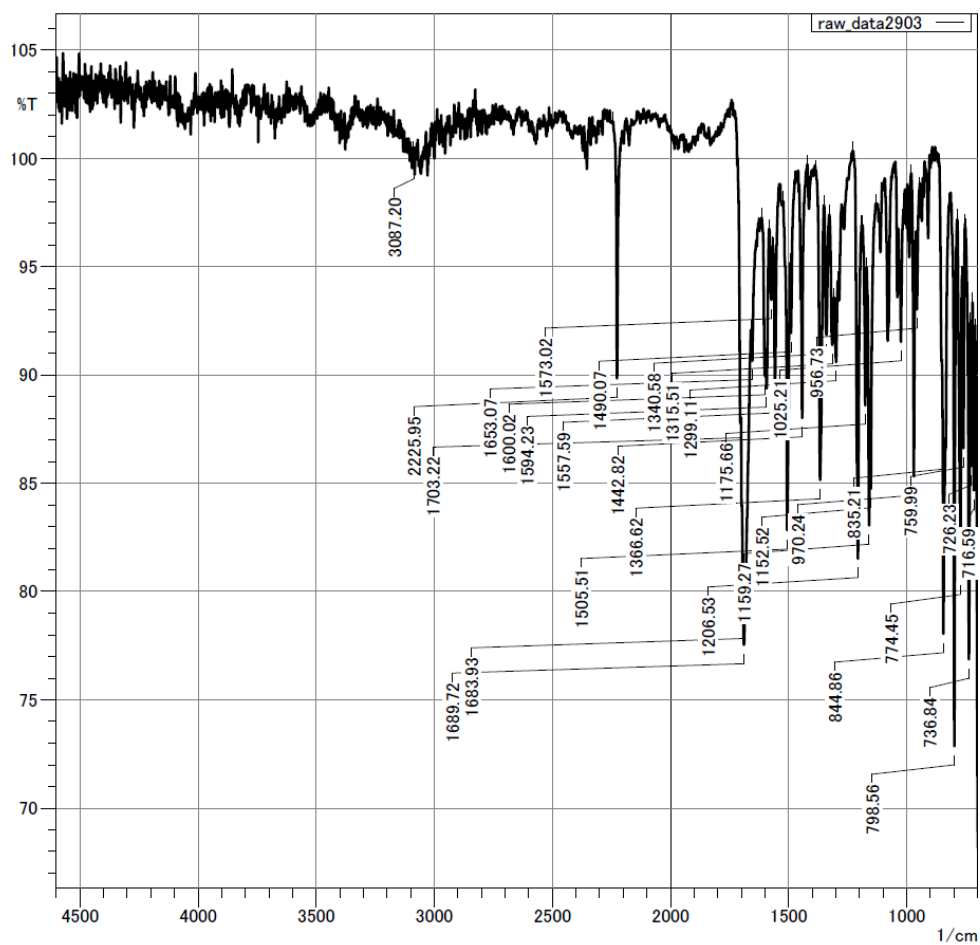

HRMS spectrum of **2p**

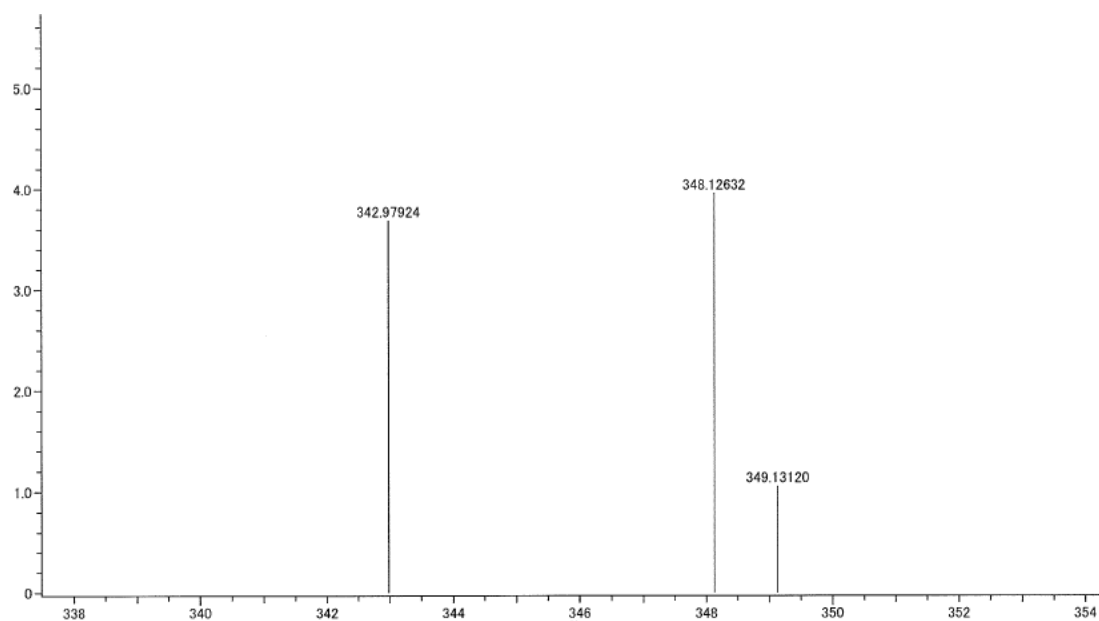

$^1\text{H}$ -NMR spectrum of **2q** ( $\text{CDCl}_3$ , 600 MHz)

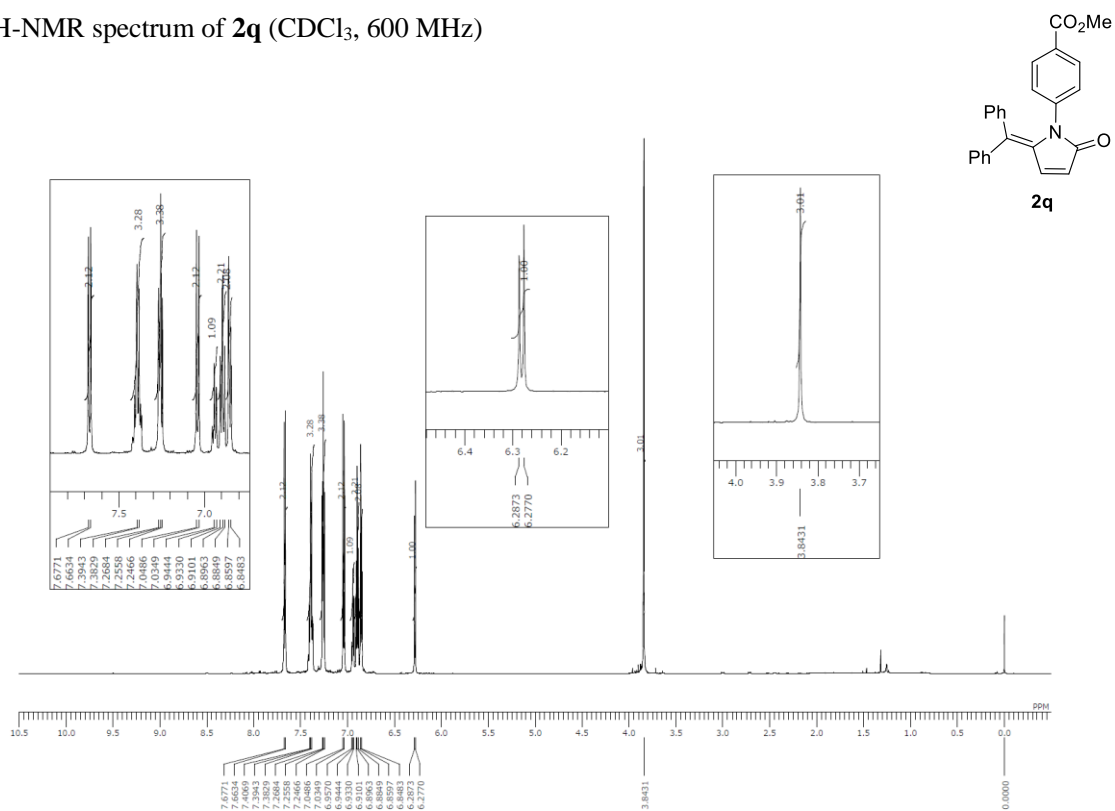

$^{13}\text{C}$ -NMR spectrum of **2q** ( $\text{CDCl}_3$ , 150 MHz)

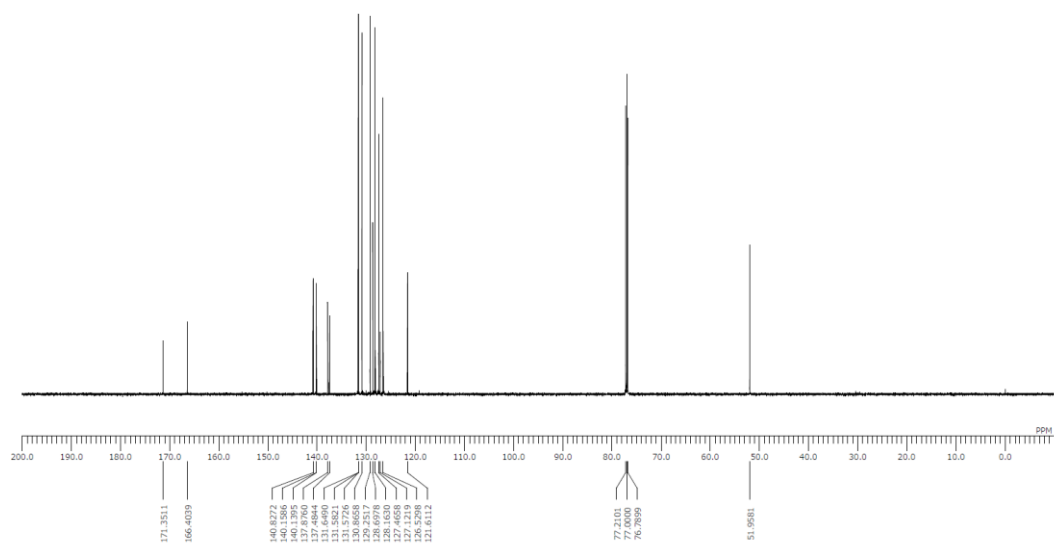

IR spectrum of **2q**

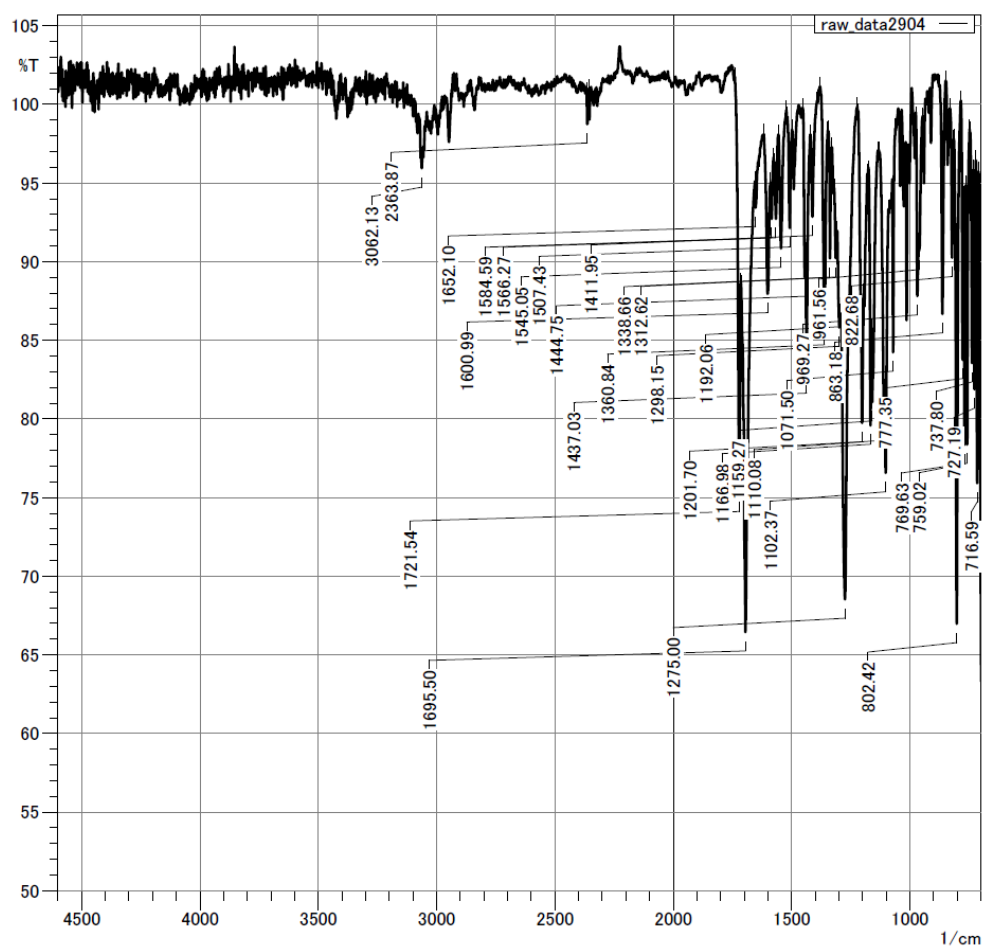

HRMS spectrum of **2q**

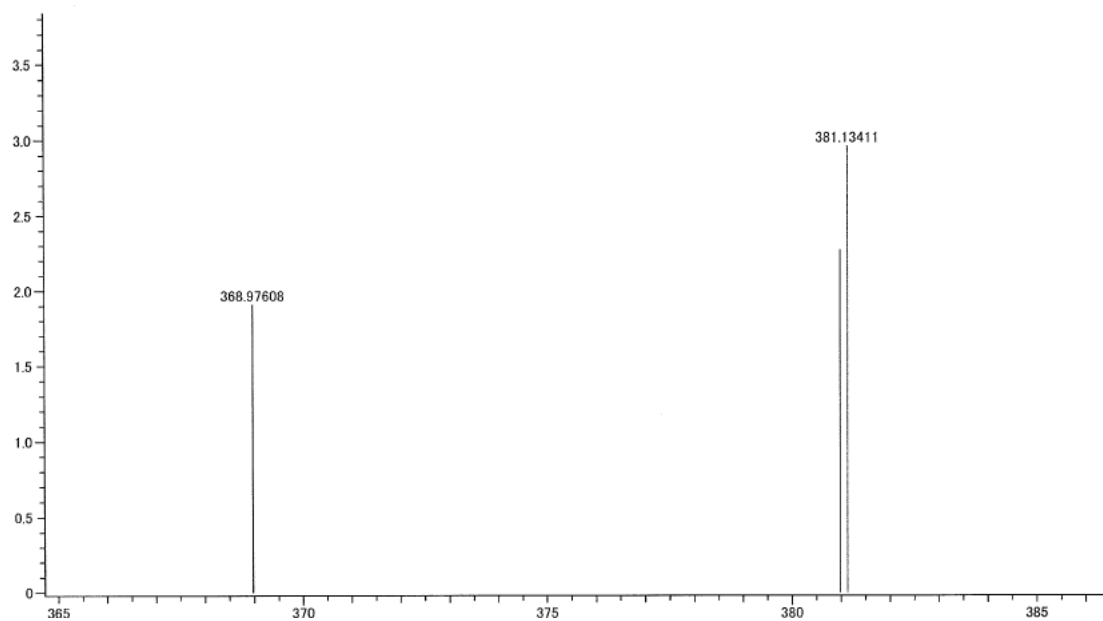

$^1\text{H}$ -NMR spectrum of **2r** ( $\text{CDCl}_3$ , 600 MHz)

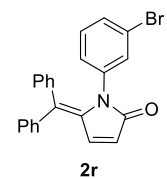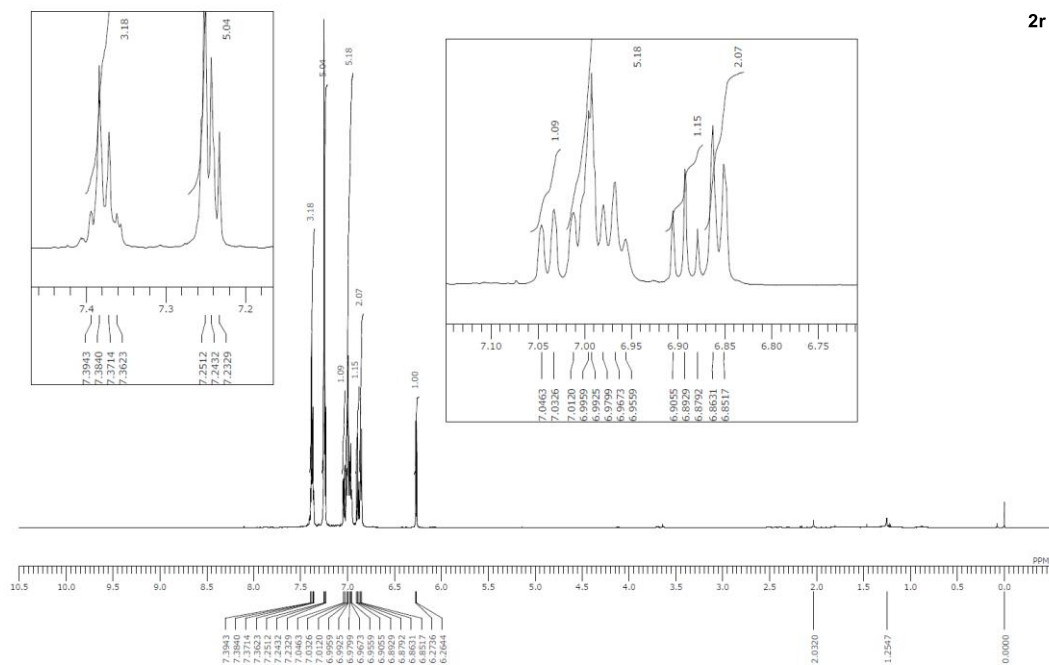

$^{13}\text{C}$ -NMR spectrum of **2r** ( $\text{CDCl}_3$ , 150 MHz)

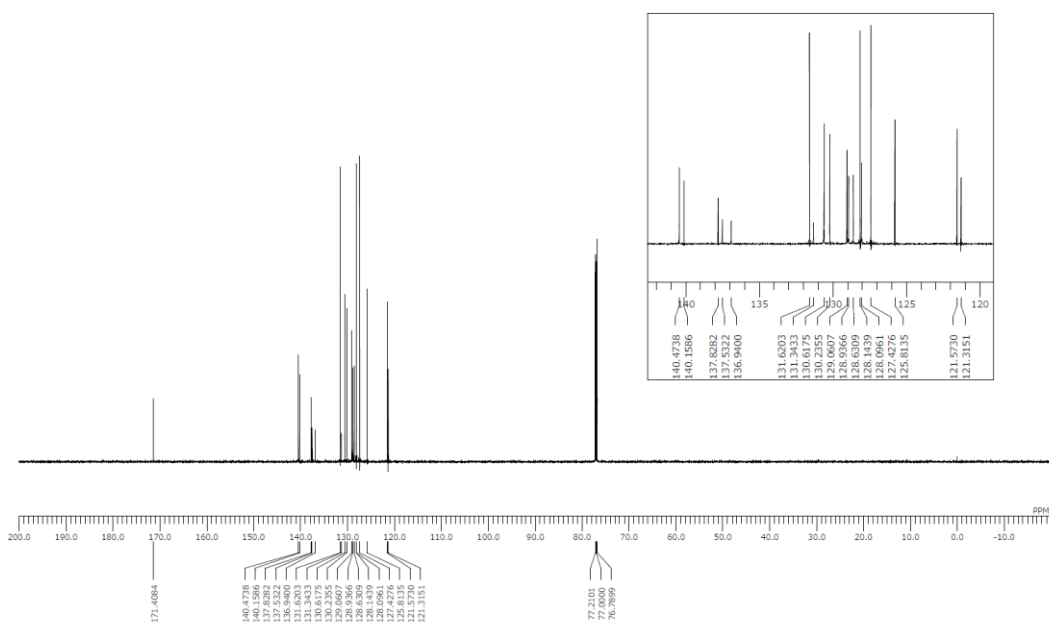

IR spectrum of **2r**

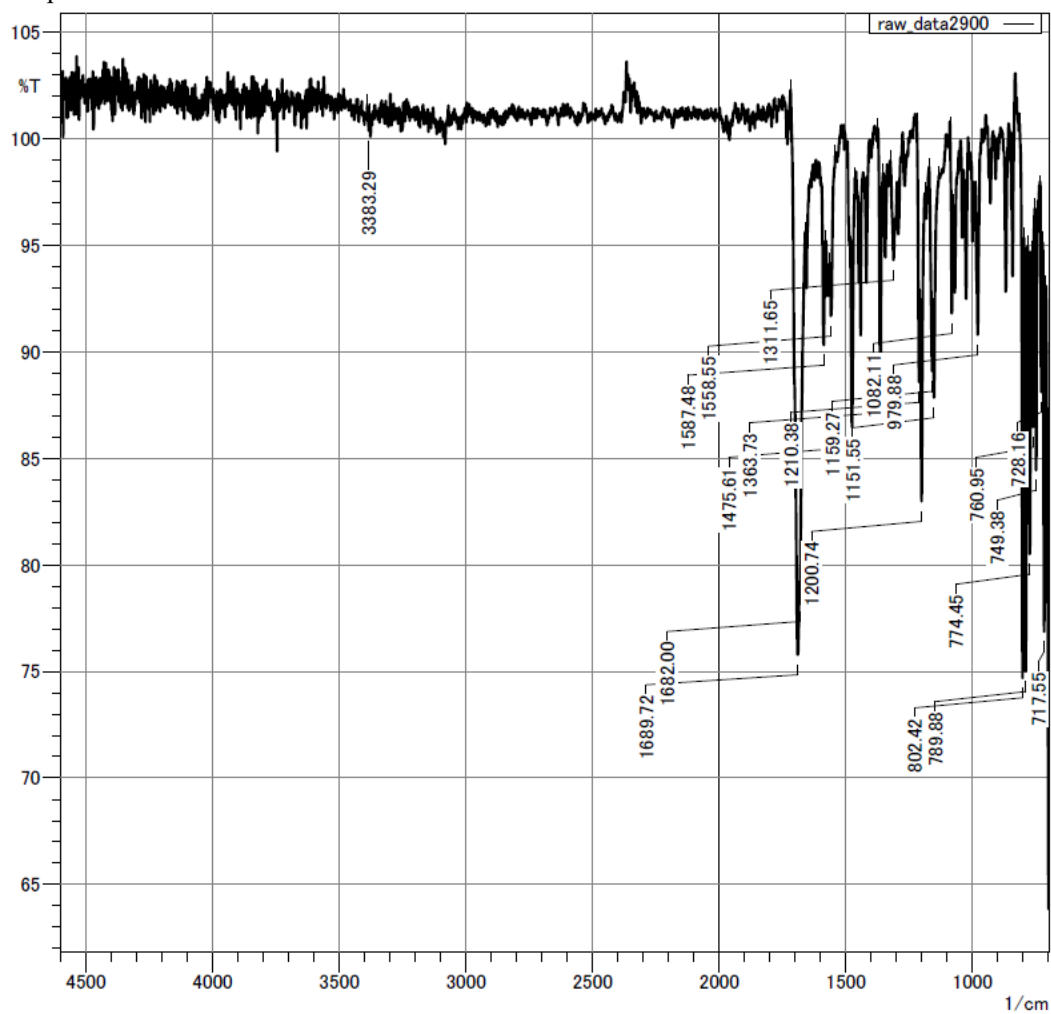

HRMS spectrum of **2r**

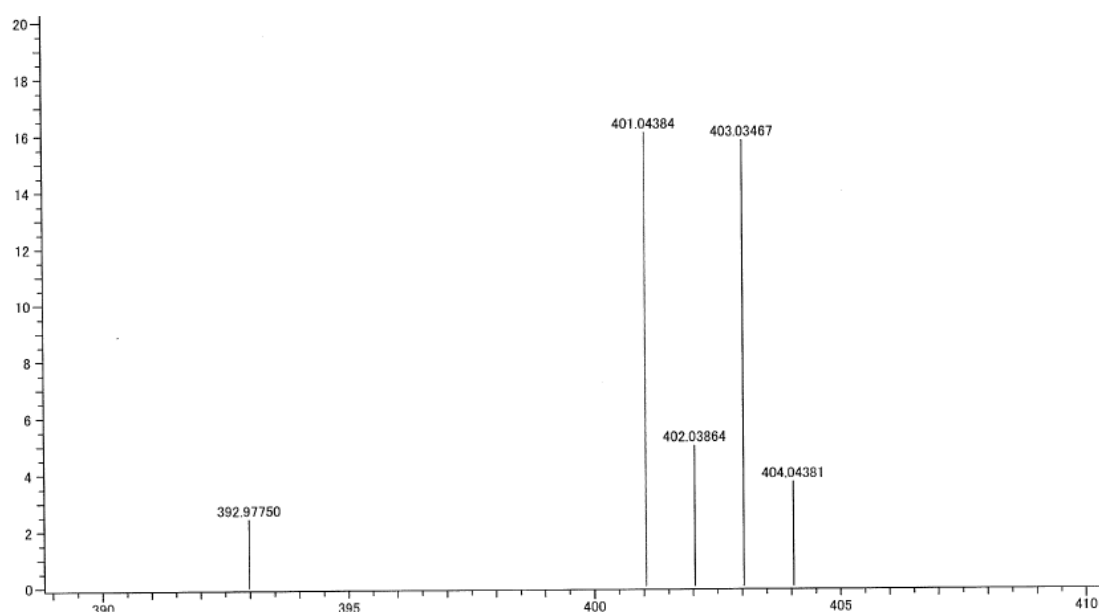

$^1\text{H}$ -NMR spectrum of **3a** ( $\text{CDCl}_3$ , 600 MHz)

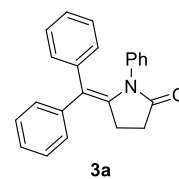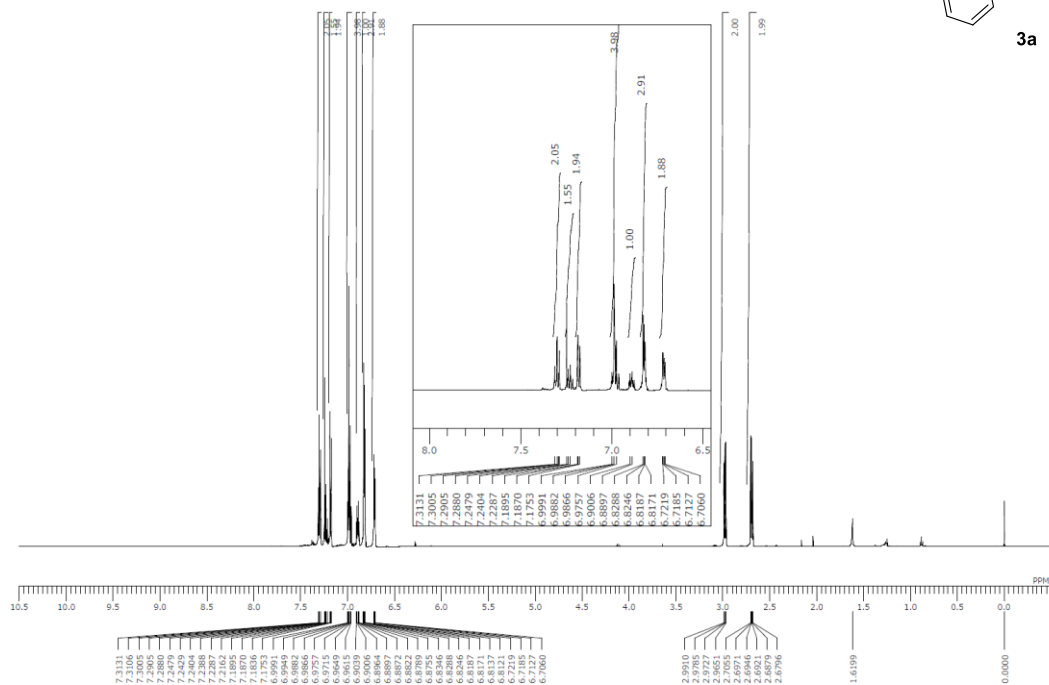

$^{13}\text{C}$ -NMR spectrum of **3a** ( $\text{CDCl}_3$ , 150 MHz)

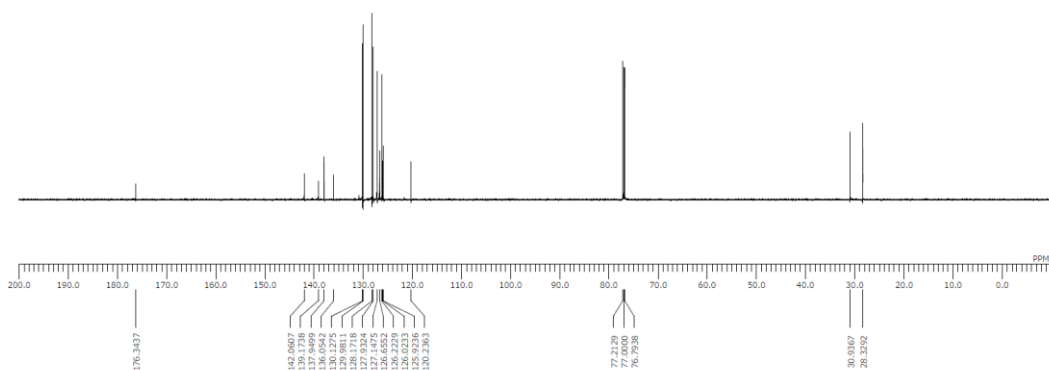



IR spectrum of **3a**

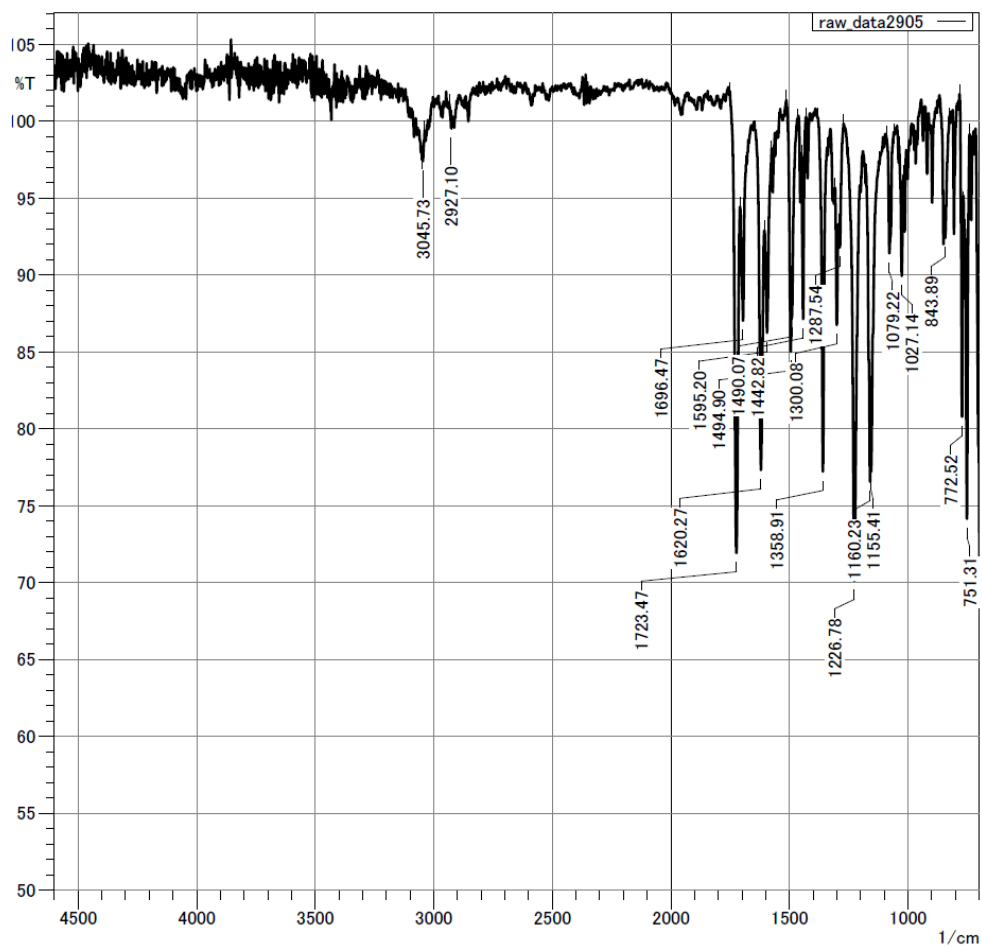

HRMS spectrum of **3a**

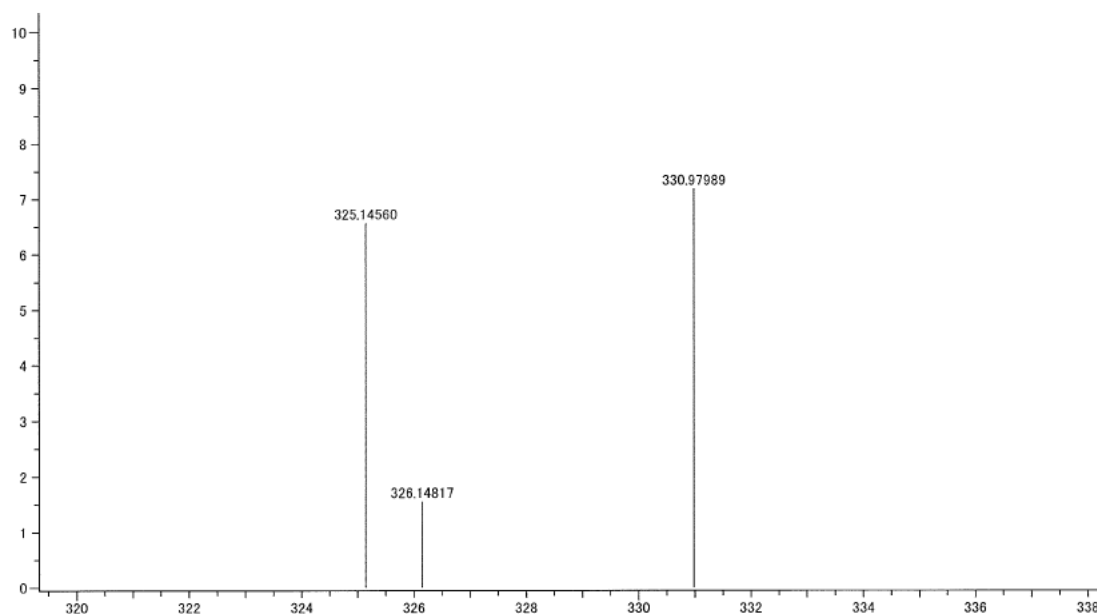

$^1\text{H}$ -NMR spectrum of **3b** ( $\text{CDCl}_3$ , 600 MHz)

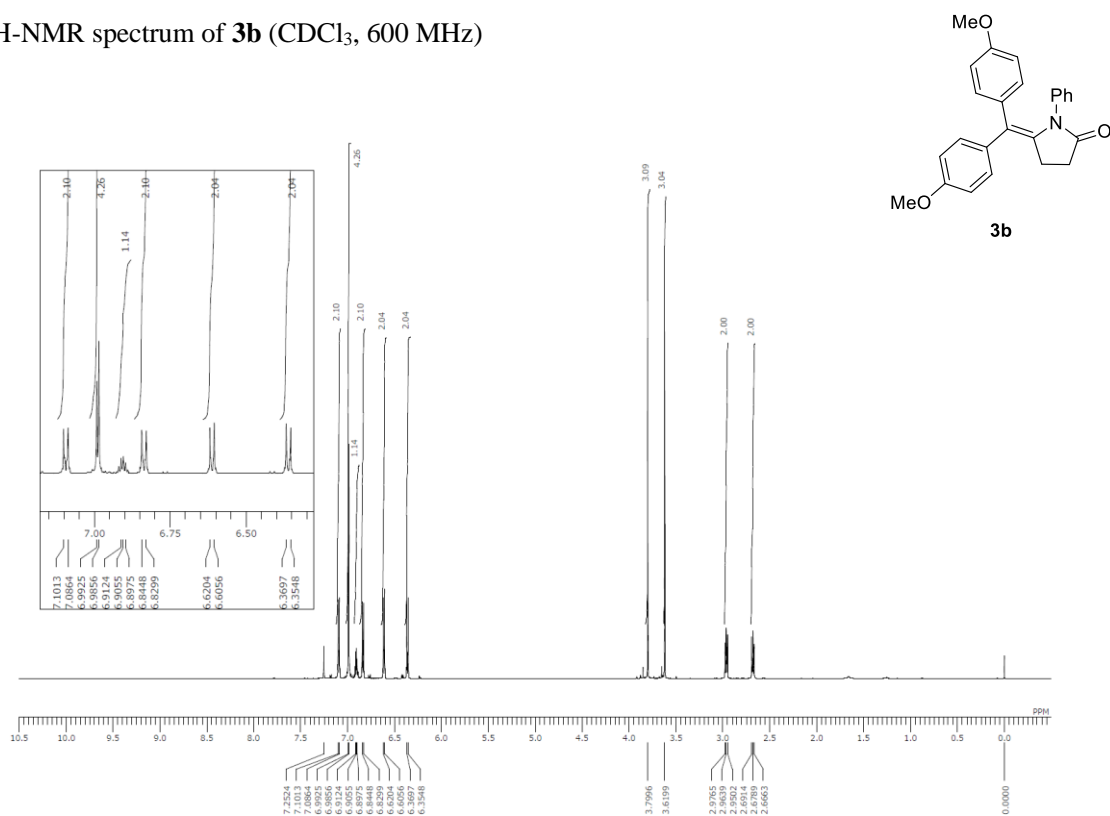

$^{13}\text{C}$ -NMR spectrum of **3b** ( $\text{CDCl}_3$ , 150 MHz)

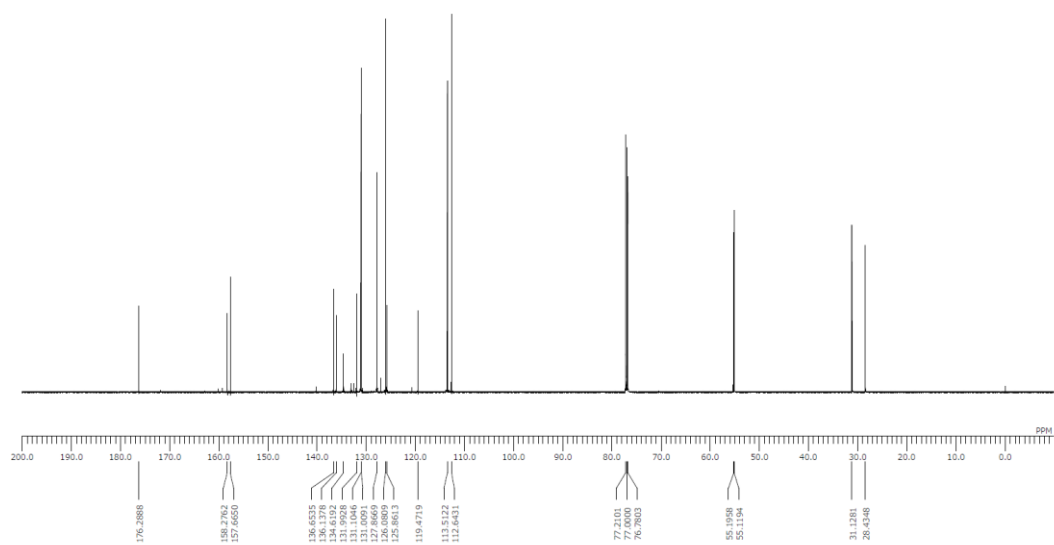

IR spectrum of **3b**

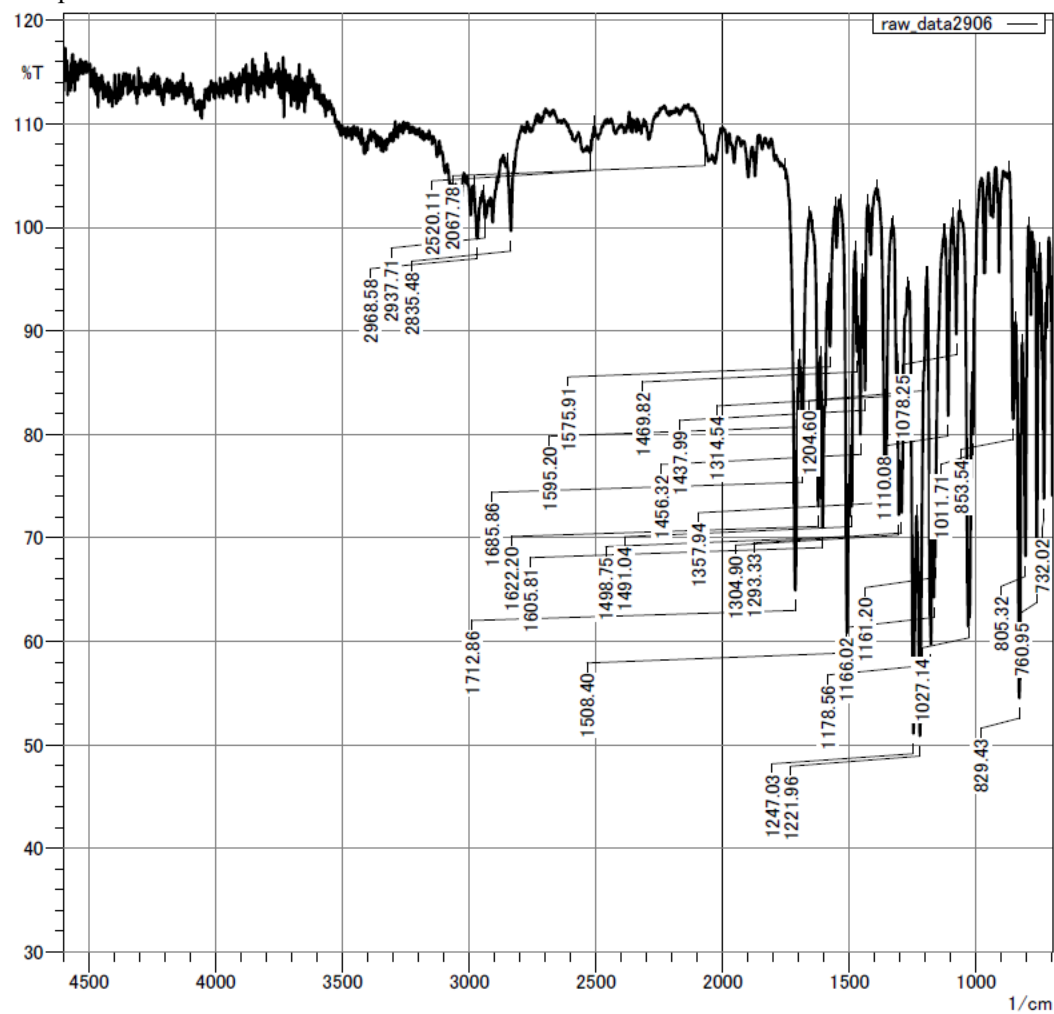

HRMS spectrum of **3b**

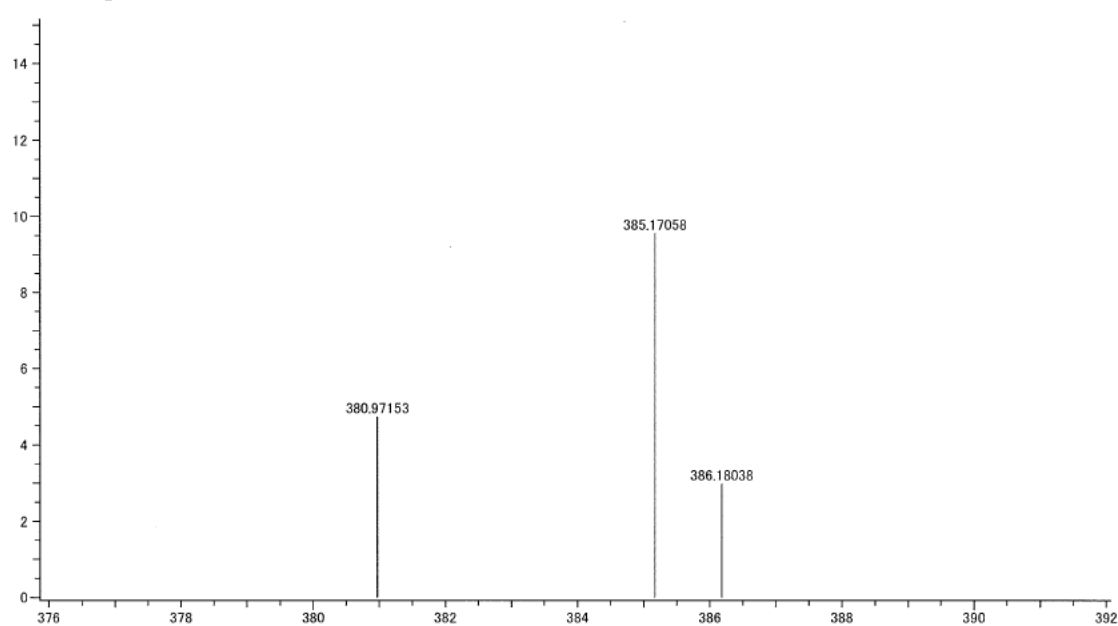

$^1\text{H}$ -NMR spectrum of **3c** (**3c** : **2c** = 93 : 7,  $\text{CDCl}_3$ , 400 MHz)

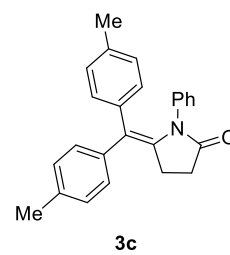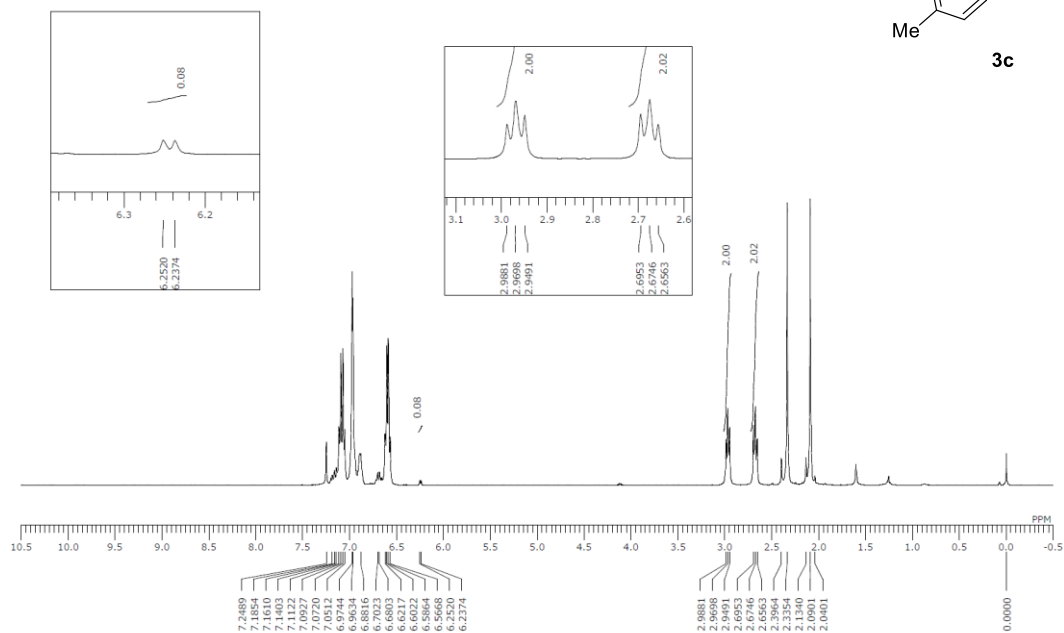

$^1\text{H}$ -NMR spectrum of **3c** ( $\text{CDCl}_3$ , 600 MHz)

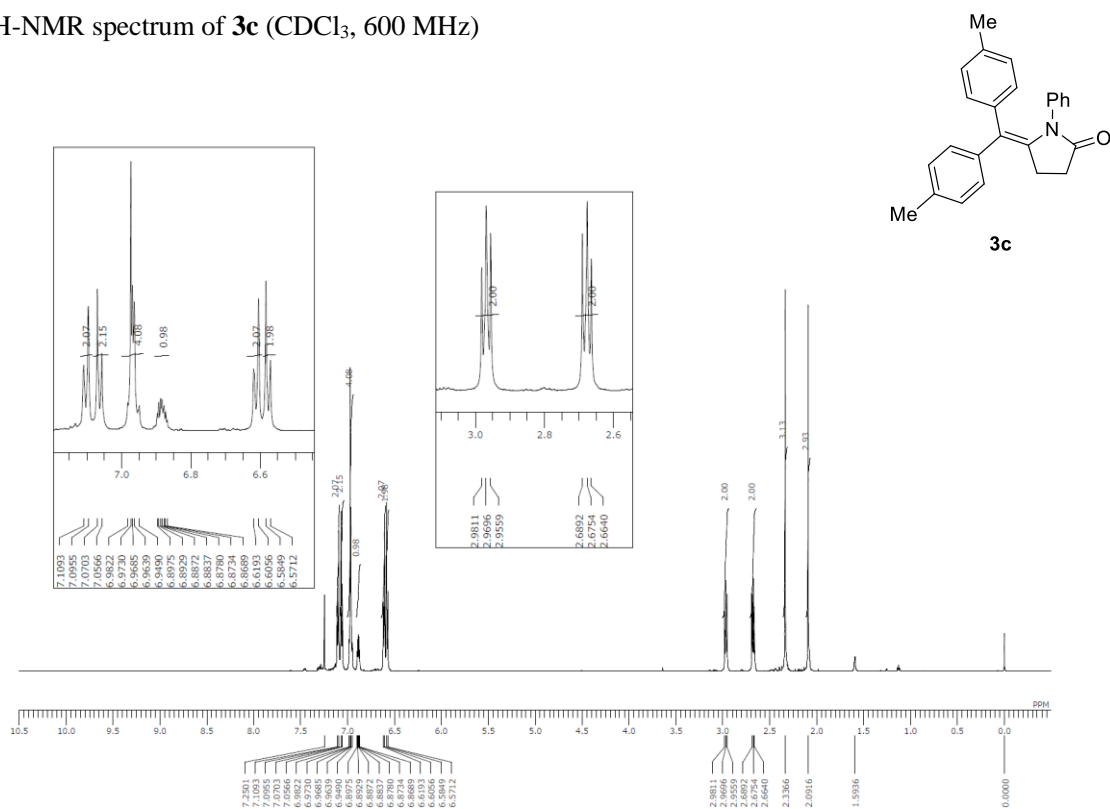

$^{13}\text{C}$ -NMR spectrum of **3c** ( $\text{CDCl}_3$ , 150 MHz)

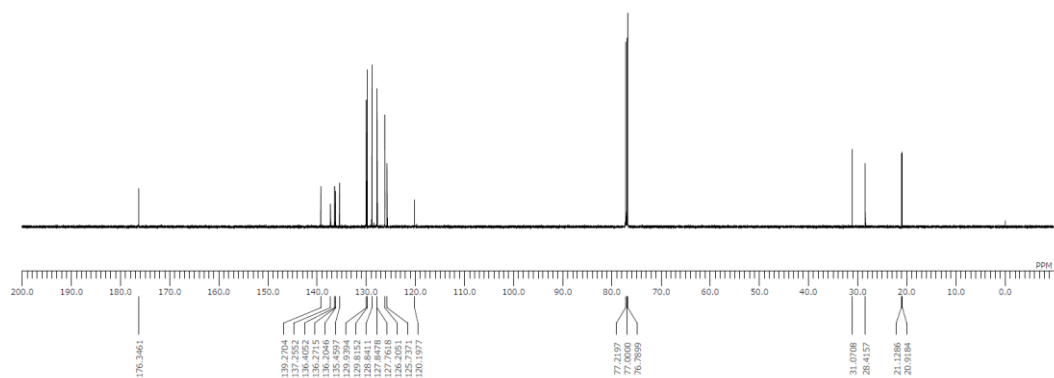

IR spectrum of **3c**

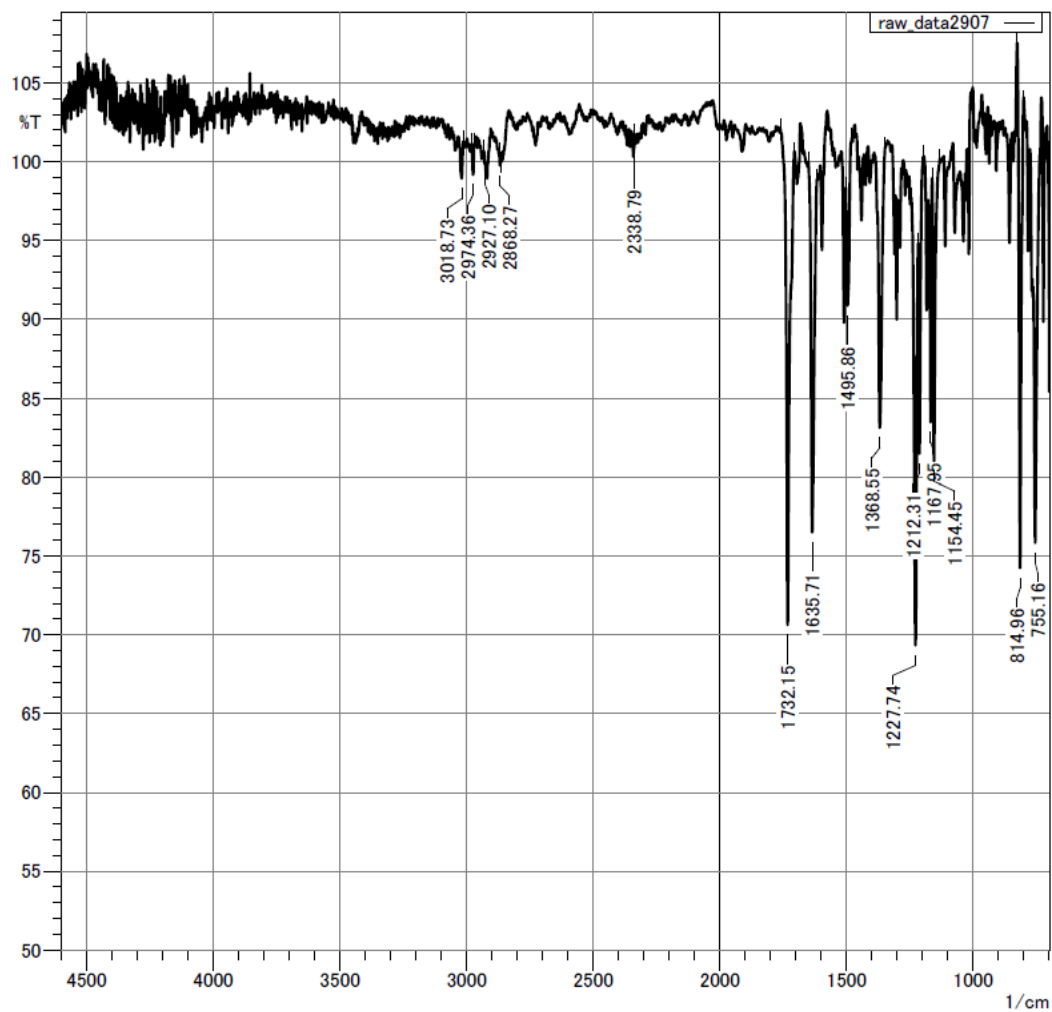

HRMS spectrum of **3c**

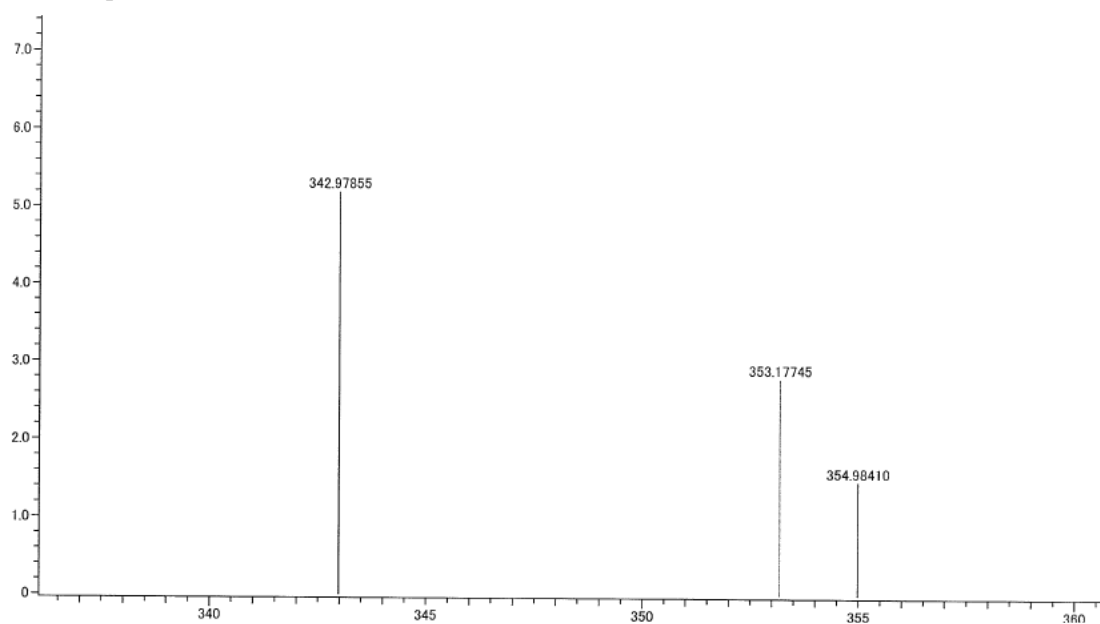

$^1\text{H}$ -NMR spectrum of **3d** (**3d** : **2d** = 95 : 5,  $\text{CDCl}_3$ , 400 MHz)

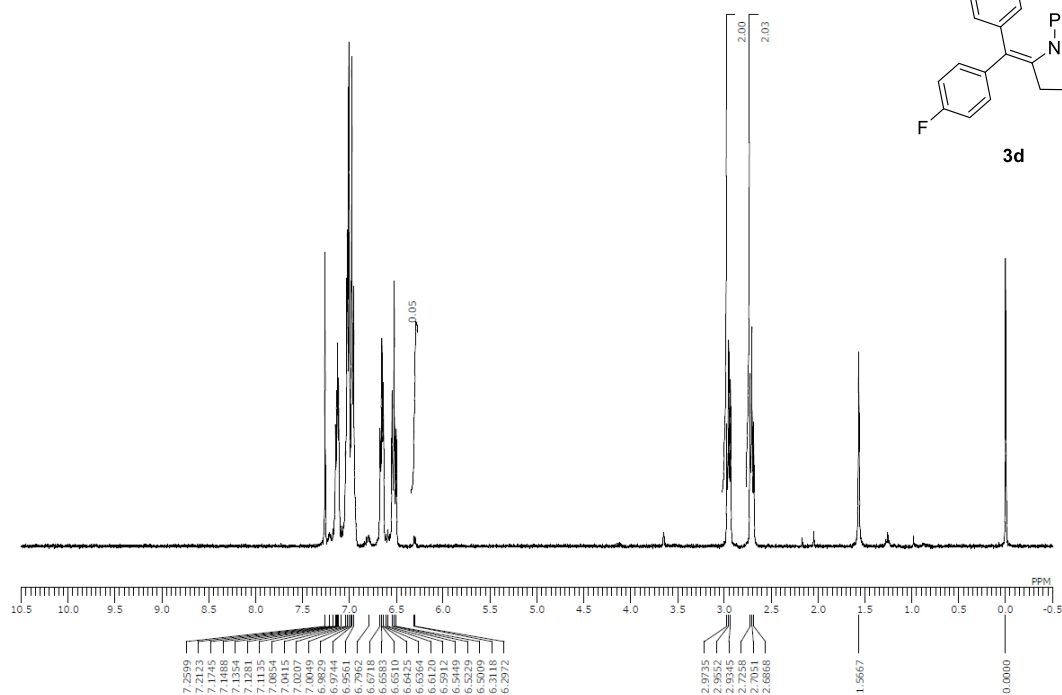

$^1\text{H}$ -NMR spectrum of **3d** ( $\text{CDCl}_3$ , 600 MHz)

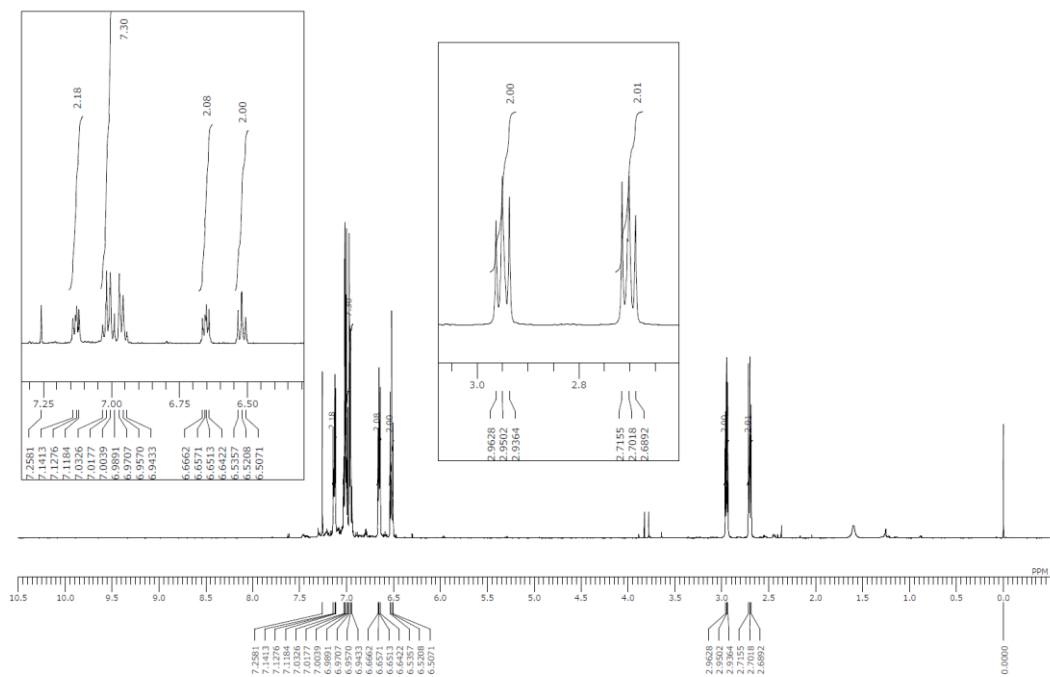

$^{13}\text{C}$ -NMR spectrum of **3d** ( $\text{CDCl}_3$ , 150 MHz)

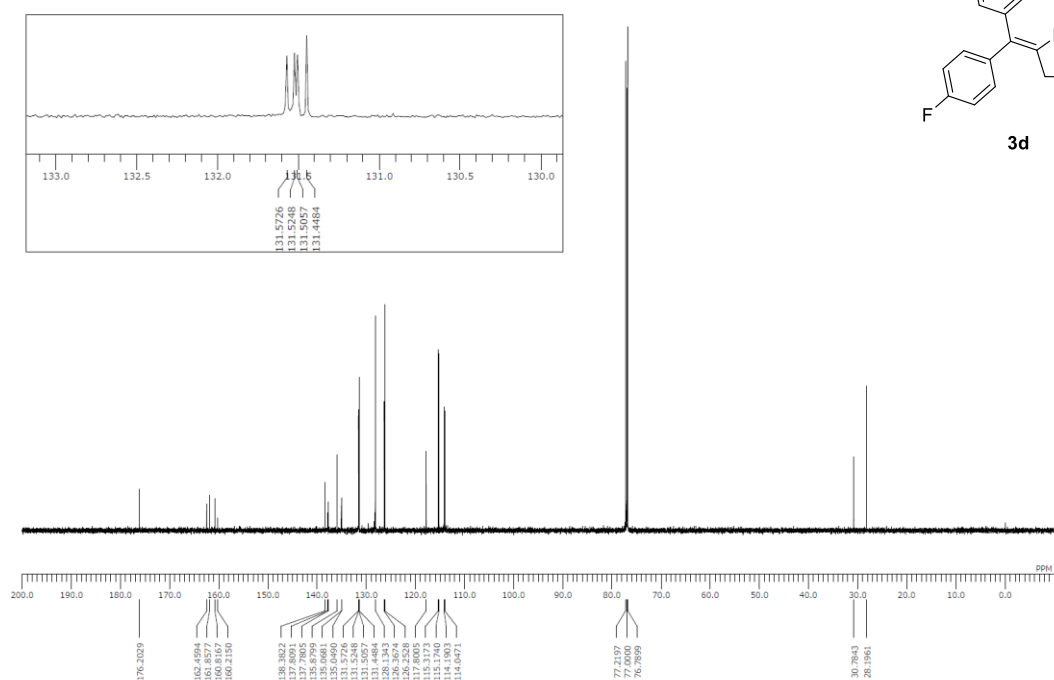

$^{19}\text{F}$ -NMR spectrum of **3d** ( $\text{CDCl}_3$ , 565 MHz)

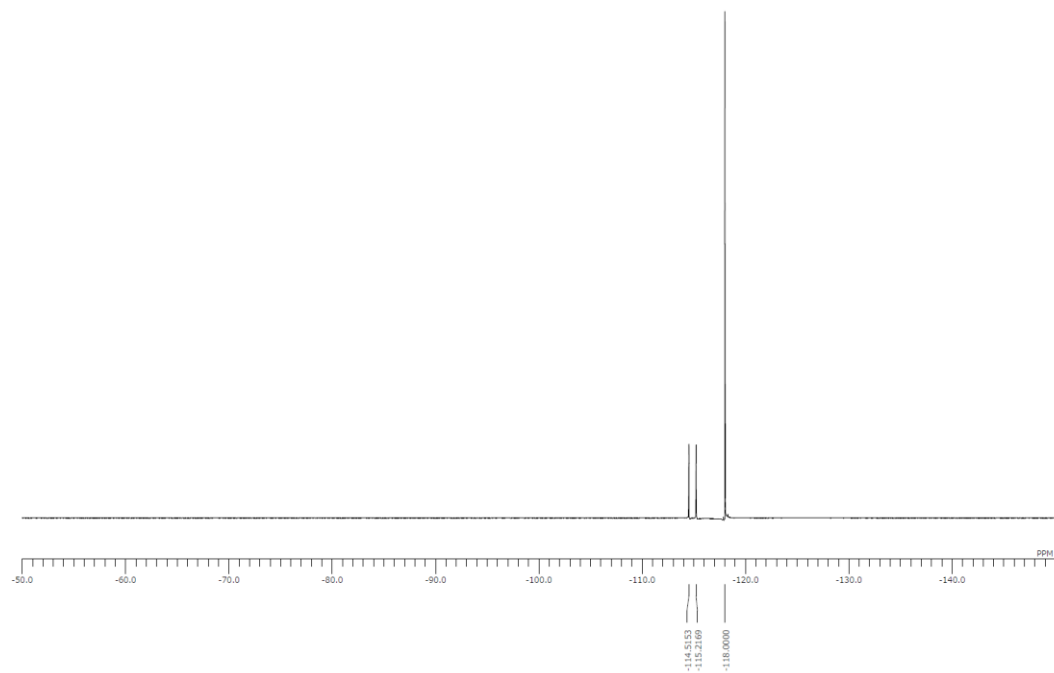



IR spectrum of **3d**

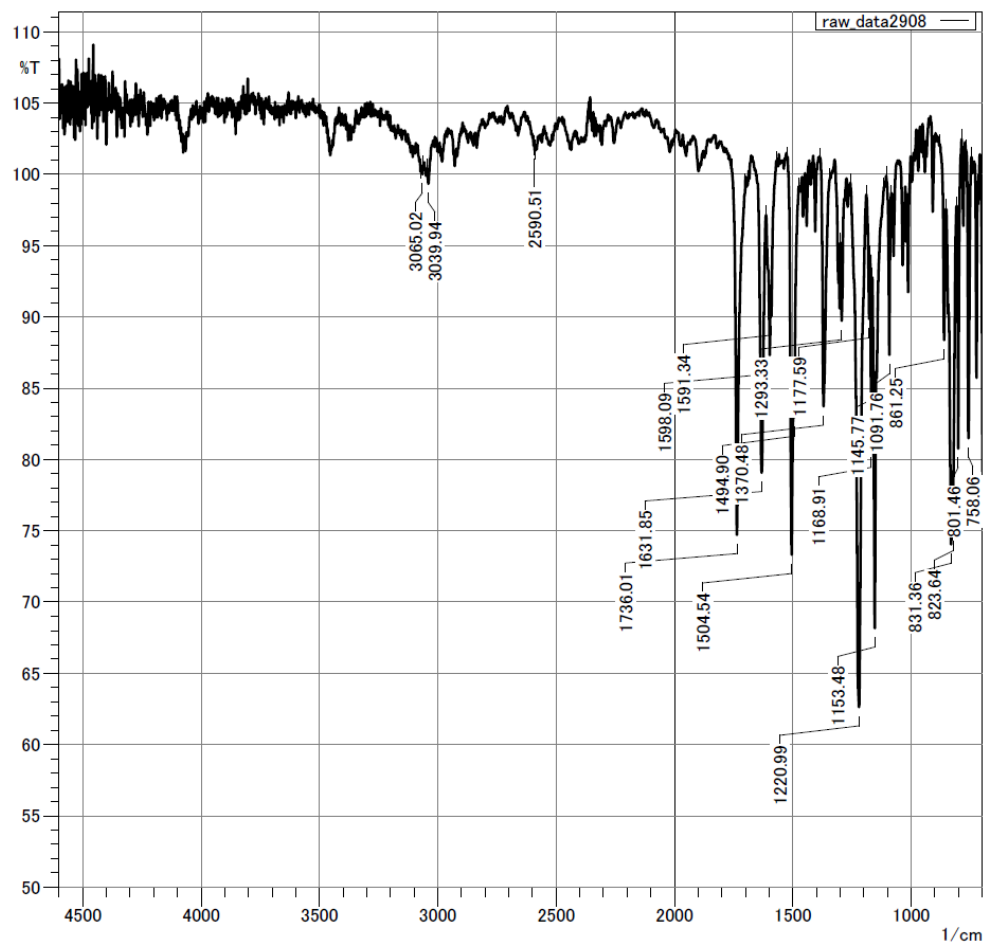

HRMS spectrum of **3d**

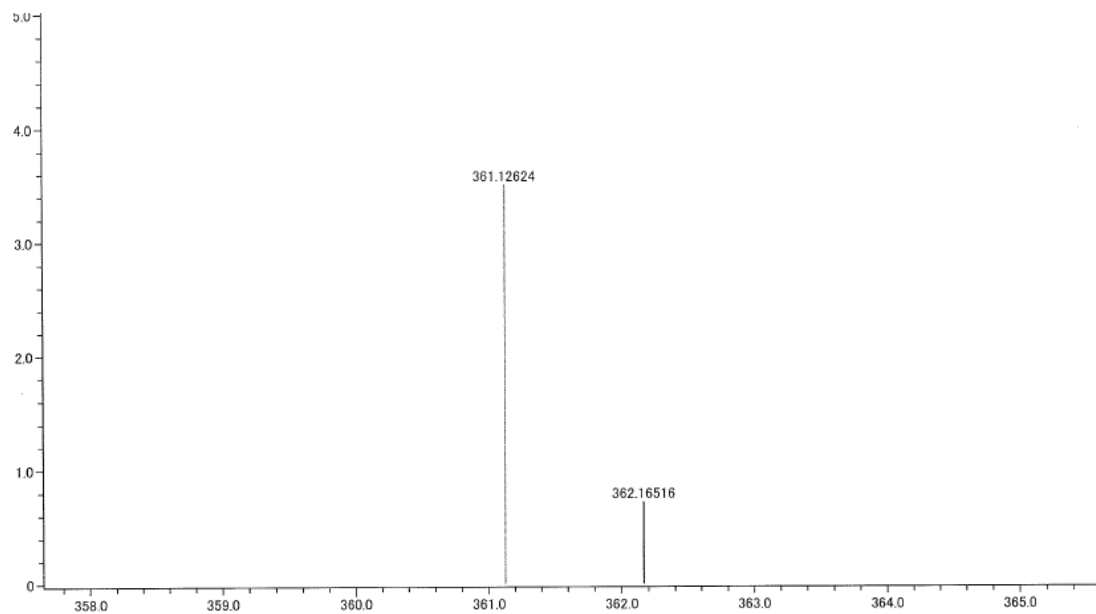

$^1\text{H}$ -NMR spectrum of **3e** (**3e** : **2e** = 94 : 6,  $\text{CDCl}_3$ , 400 MHz)

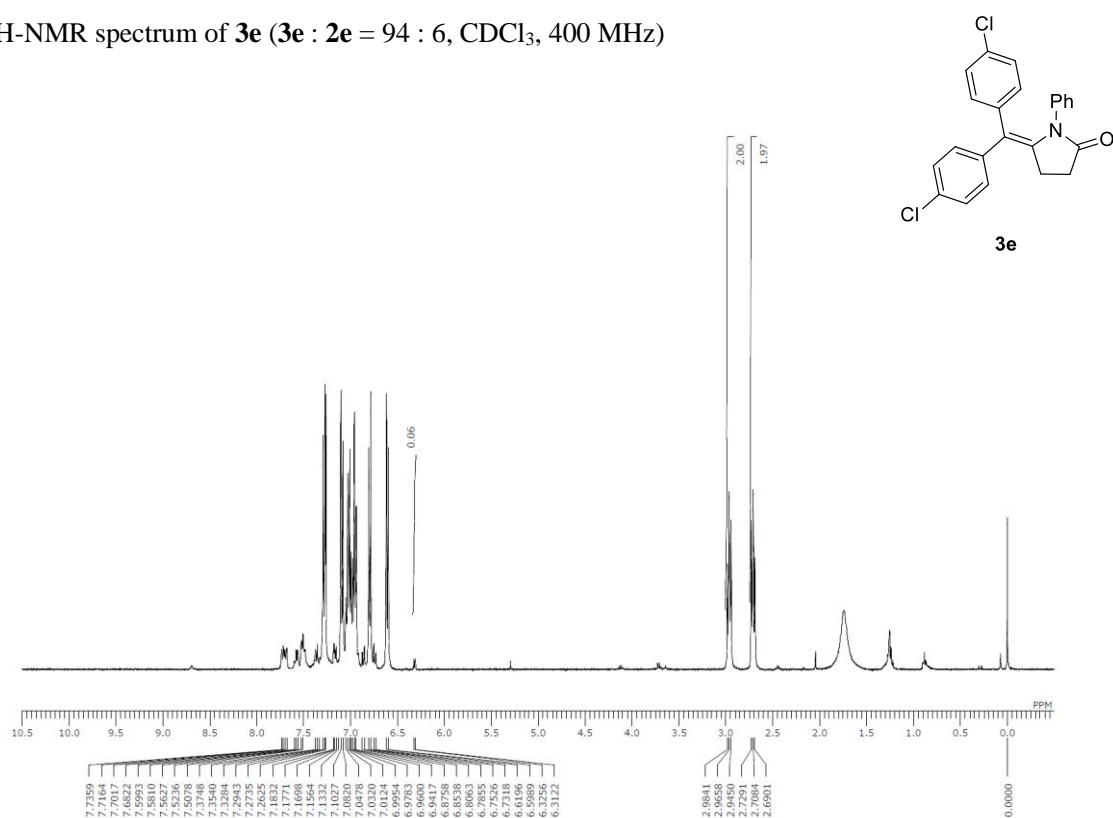

$^1\text{H}$ -NMR spectrum of **3e** ( $\text{CDCl}_3$ , 600 MHz)

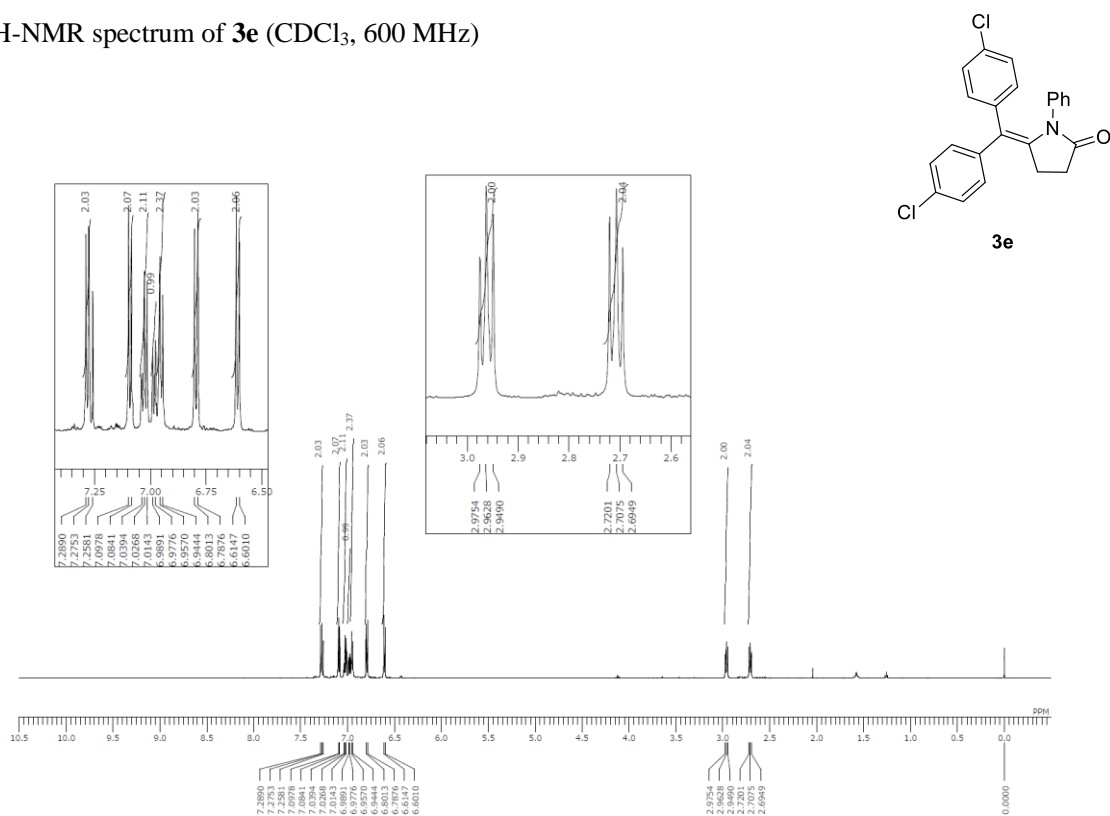

$^{13}\text{C}$ -NMR spectrum of **3e** ( $\text{CDCl}_3$ , 150 MHz)

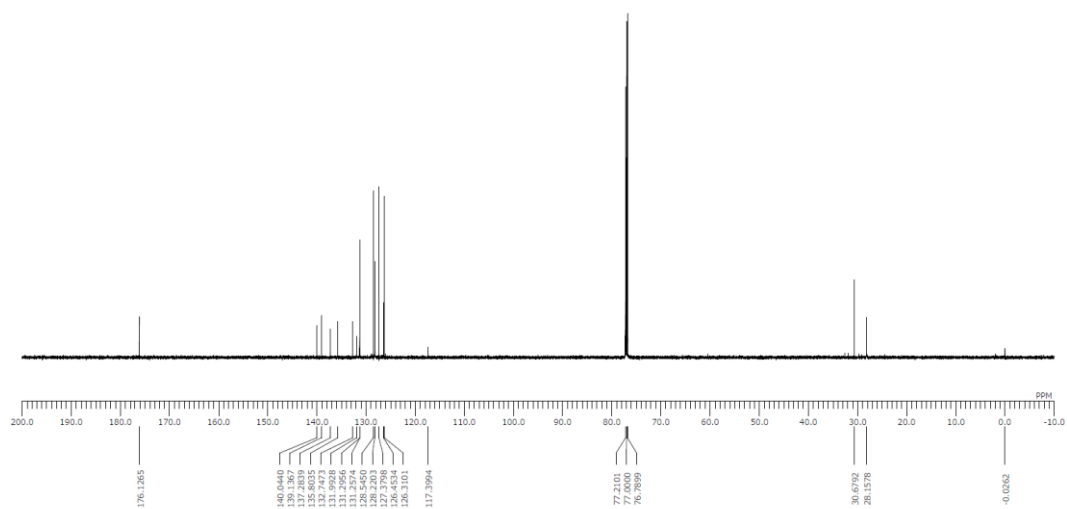

IR spectrum of **3e**

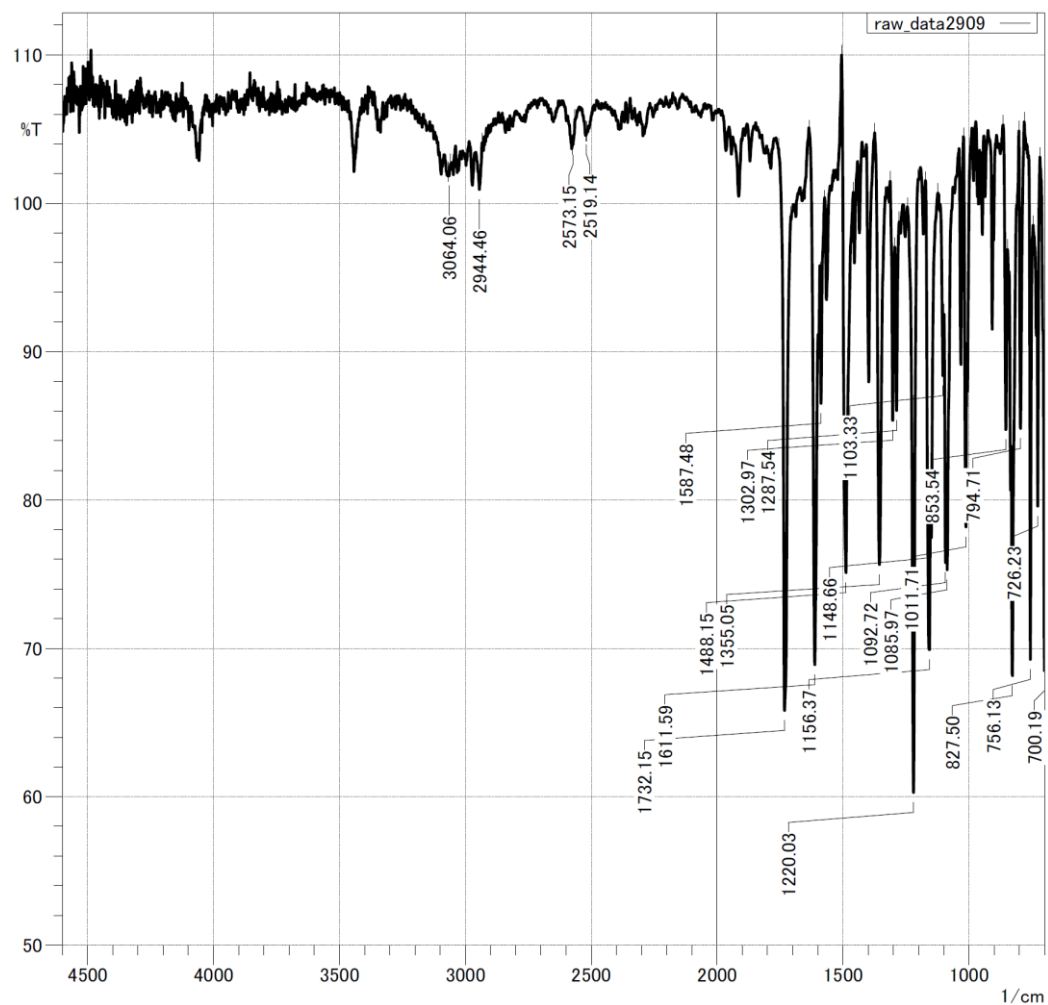

HRMS spectrum of **3e**

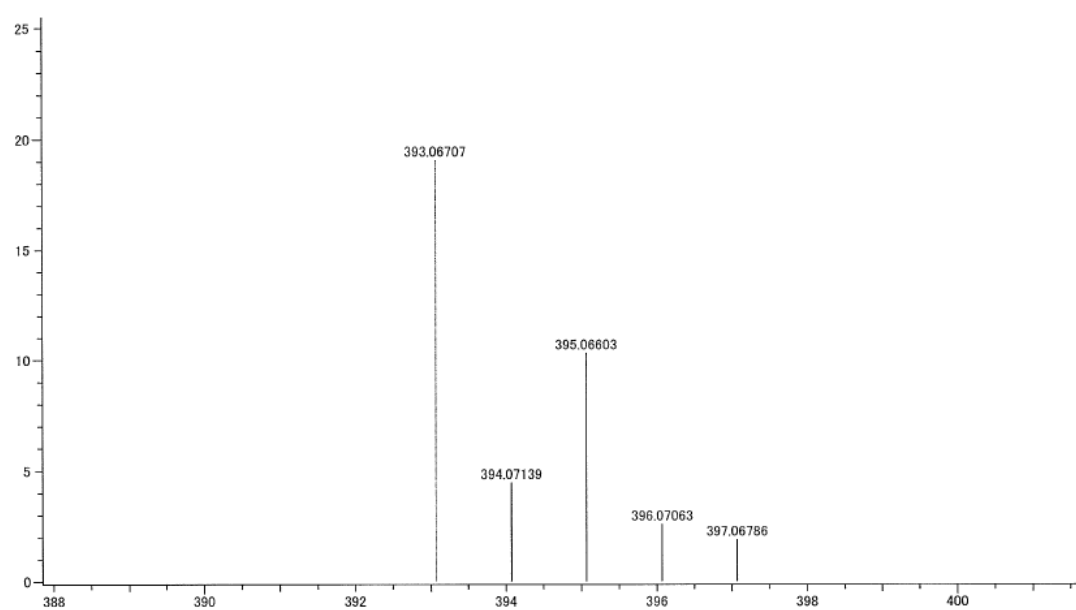

$^1\text{H}$ -NMR spectrum of **3h** (DMSO- $d_6$ , 600 MHz)

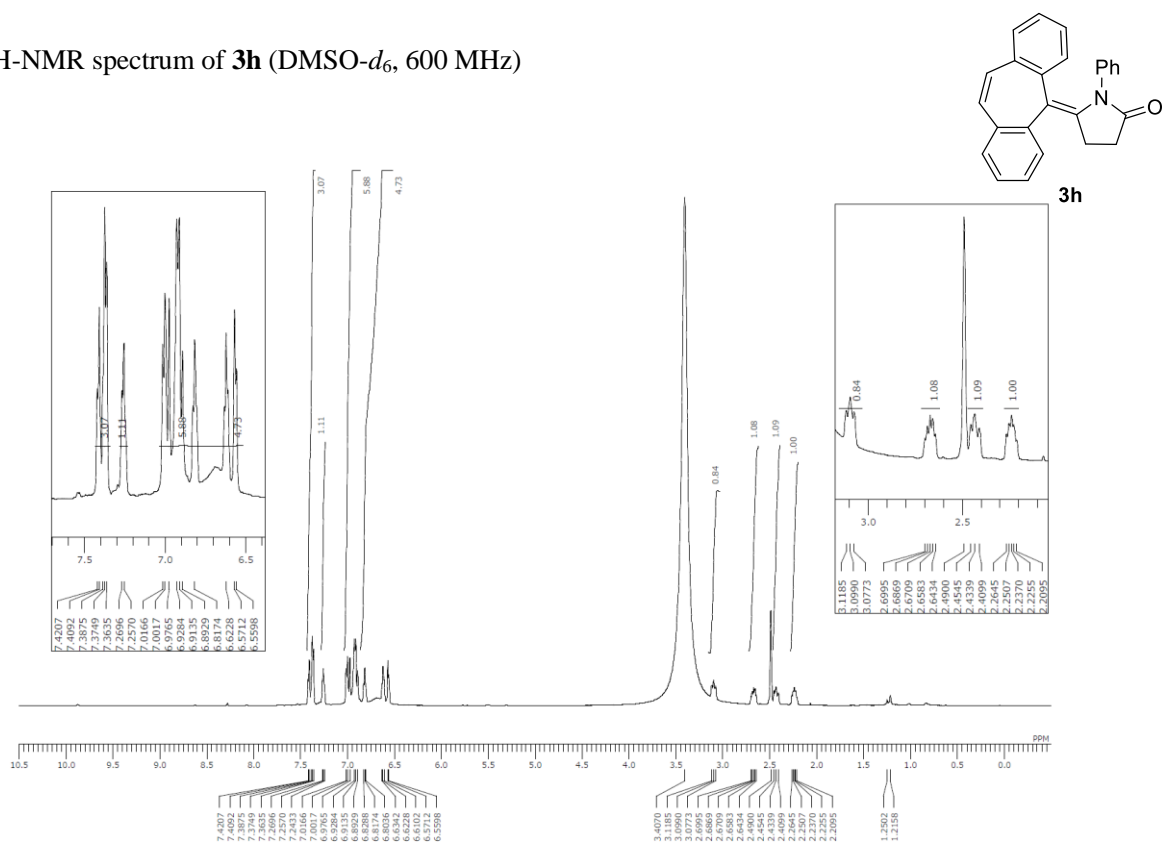

$^{13}\text{C}$ -NMR spectrum of **3h** (DMSO- $d_6$ , 150 MHz)

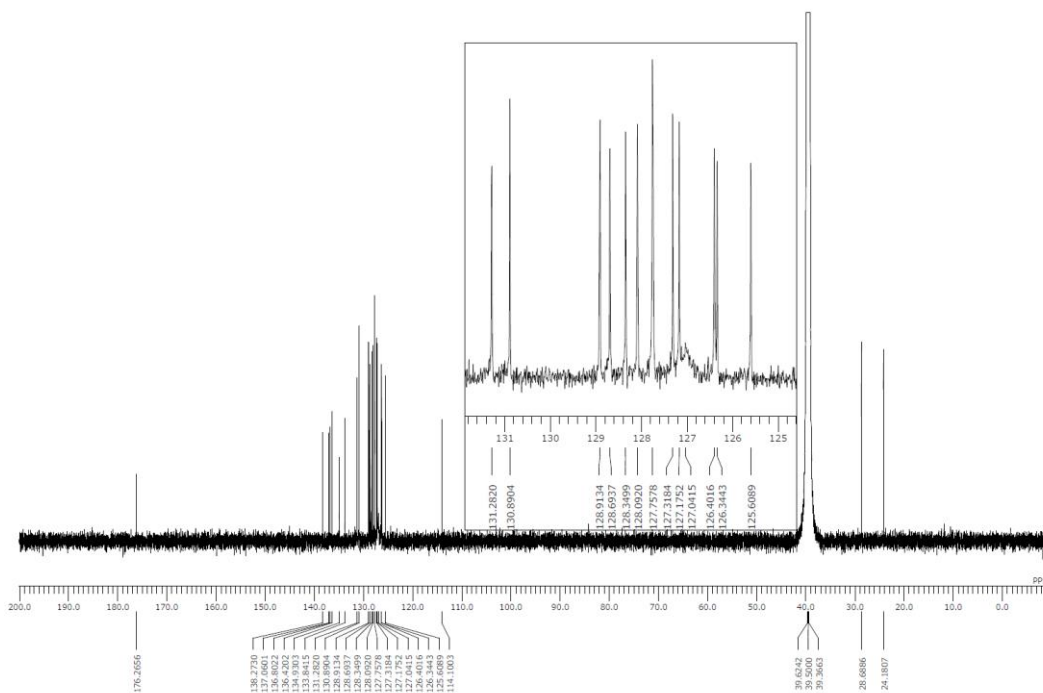

IR spectrum of **3h**

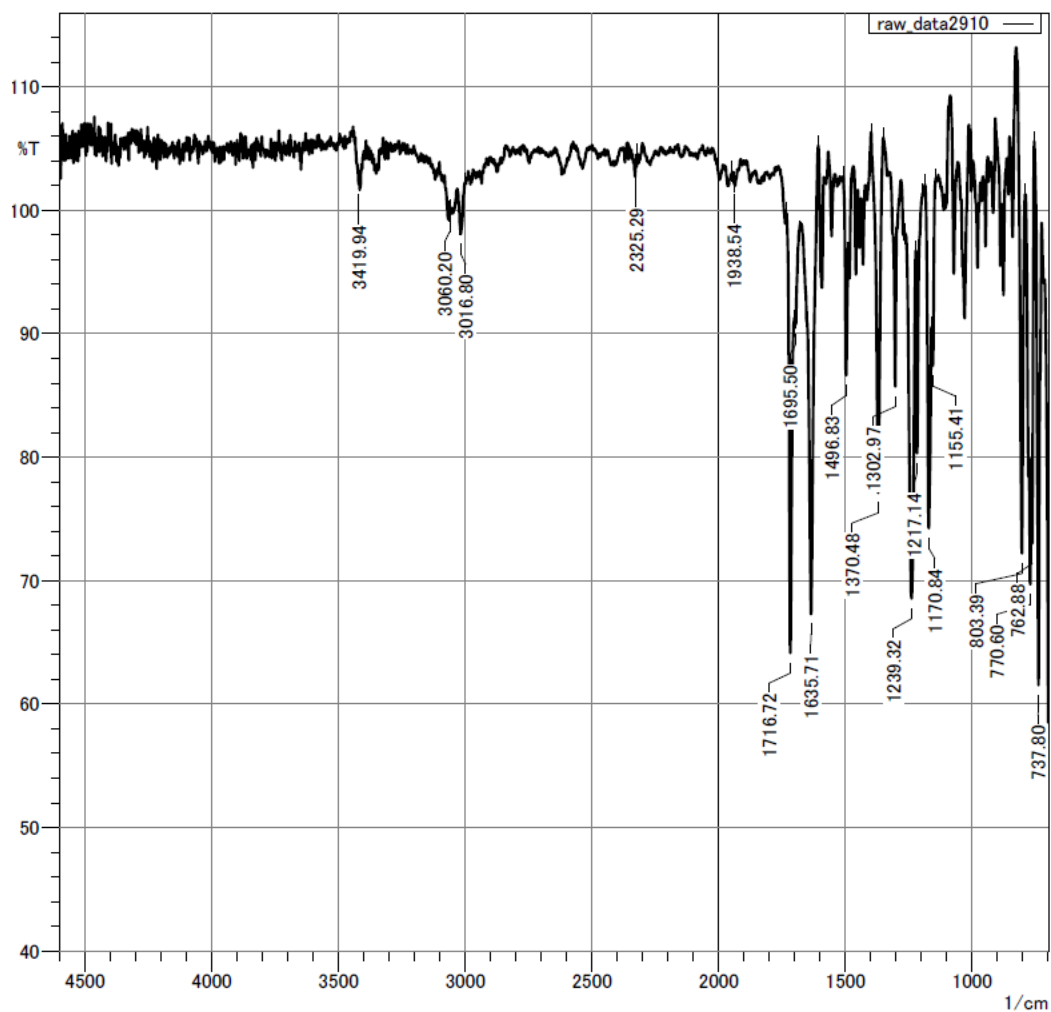

HRMS spectrum of **3h**

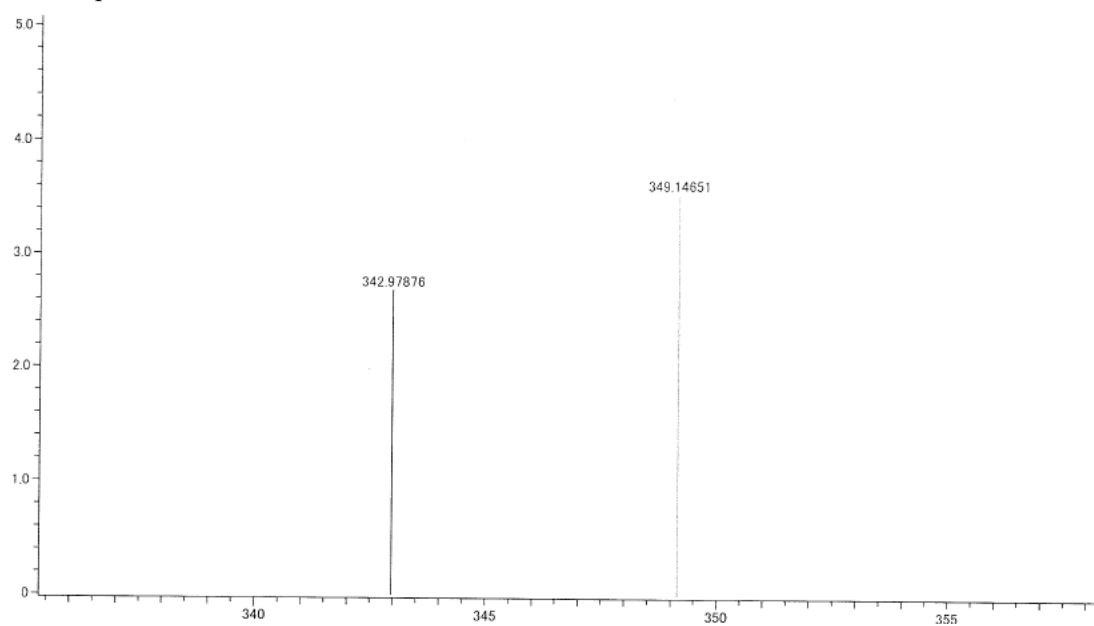

$^1\text{H}$ -NMR spectrum of **3i** (**3i** : **2i** = 93 : 7,  $\text{CDCl}_3$ , 400 MHz)

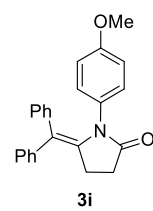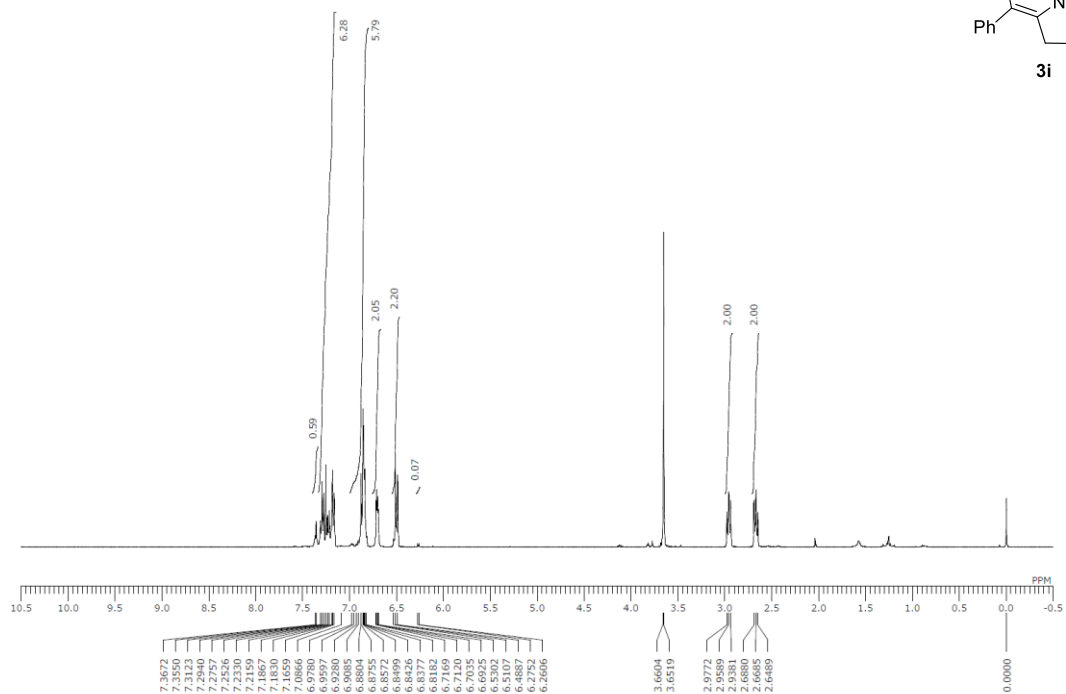

$^1\text{H}$ -NMR spectrum of **3i** ( $\text{CDCl}_3$ , 600 MHz)

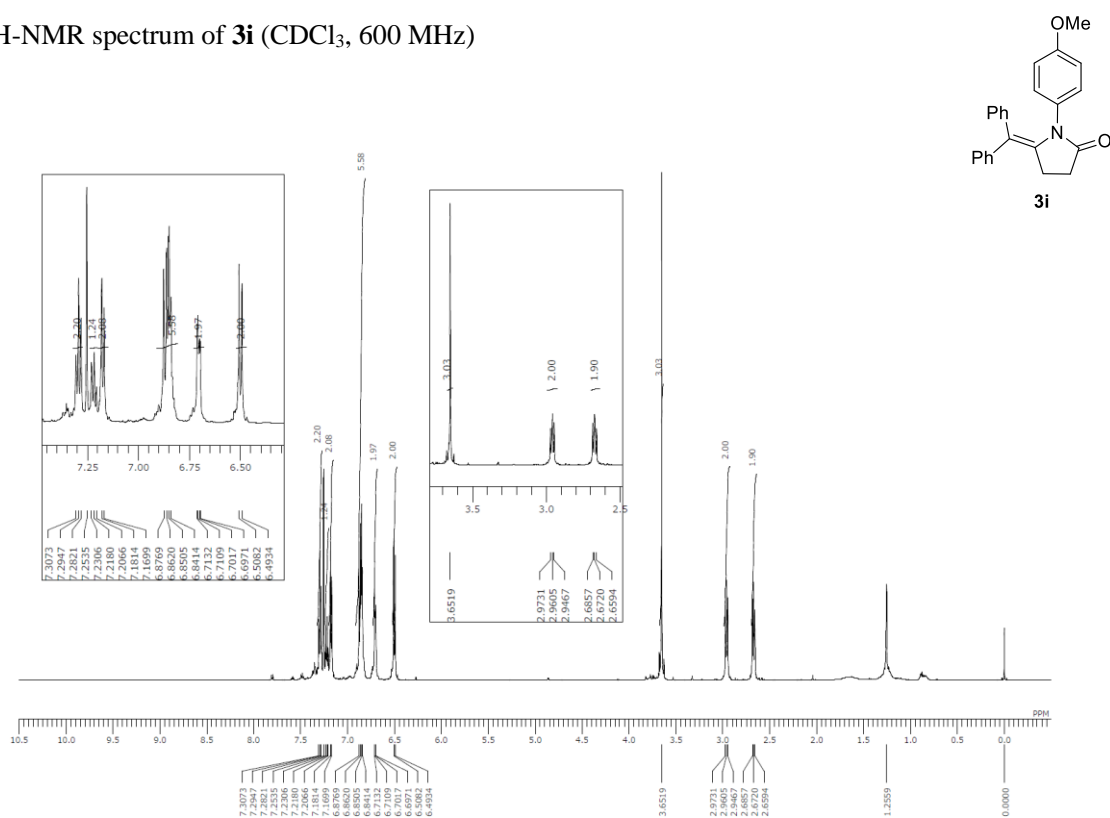

$^{13}\text{C}$ -NMR spectrum of **3i** ( $\text{CDCl}_3$ , 150 MHz)

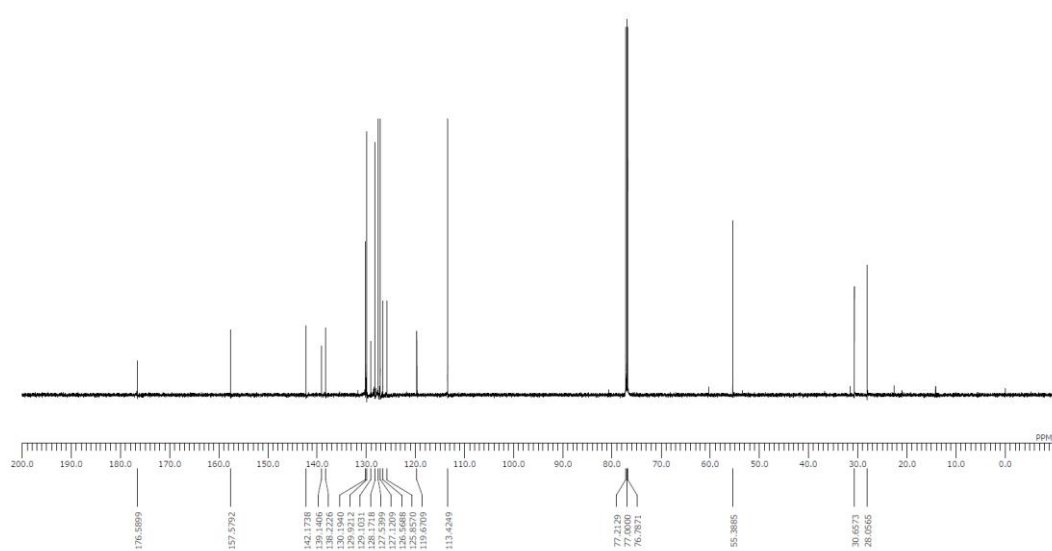



IR spectrum of **3i**

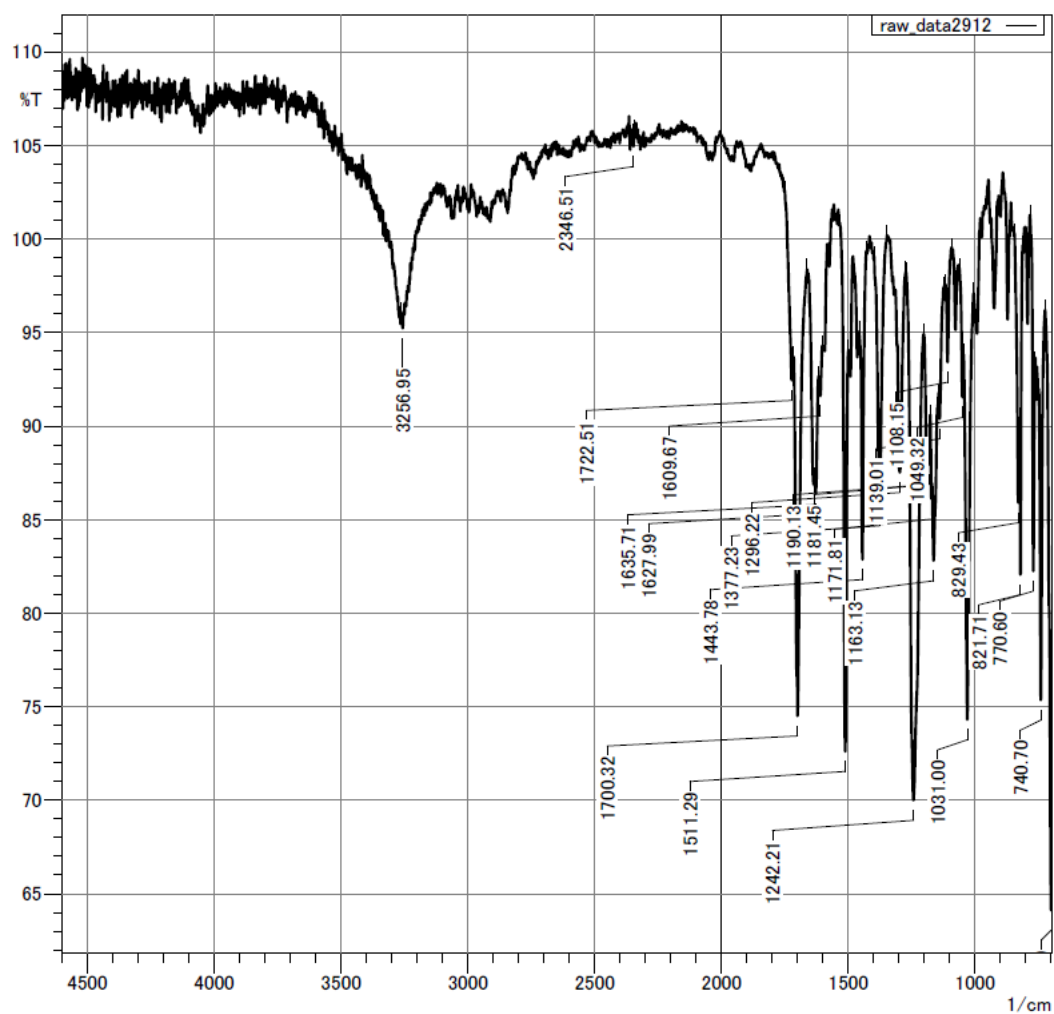

HRMS spectrum of **3i**

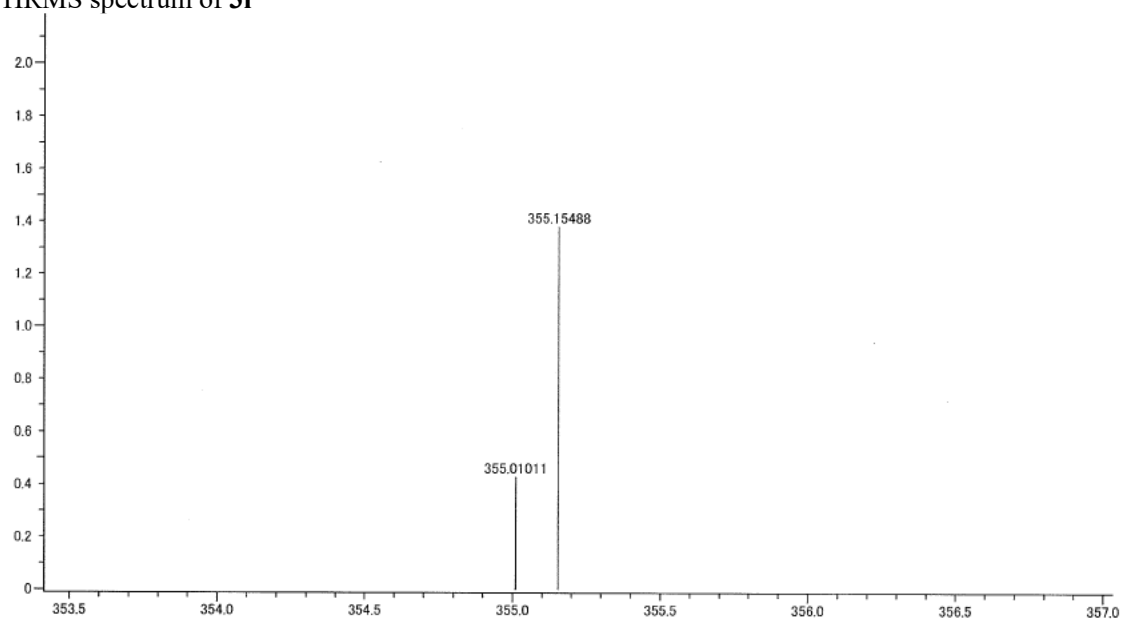

$^1\text{H}$ -NMR spectrum of **3j** (**3j** : **2j** = 93 : 7,  $\text{CDCl}_3$ , 400 MHz)

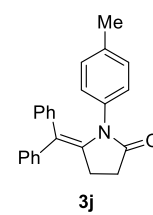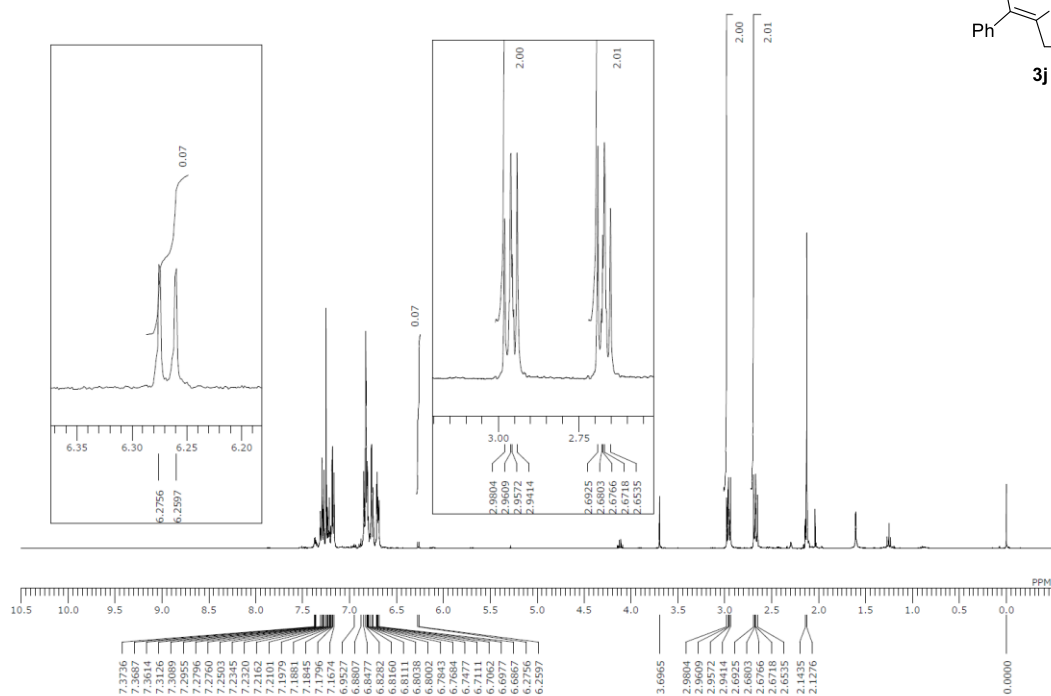

$^1\text{H}$ -NMR spectrum of **3j** ( $\text{CDCl}_3$ , 600 MHz)

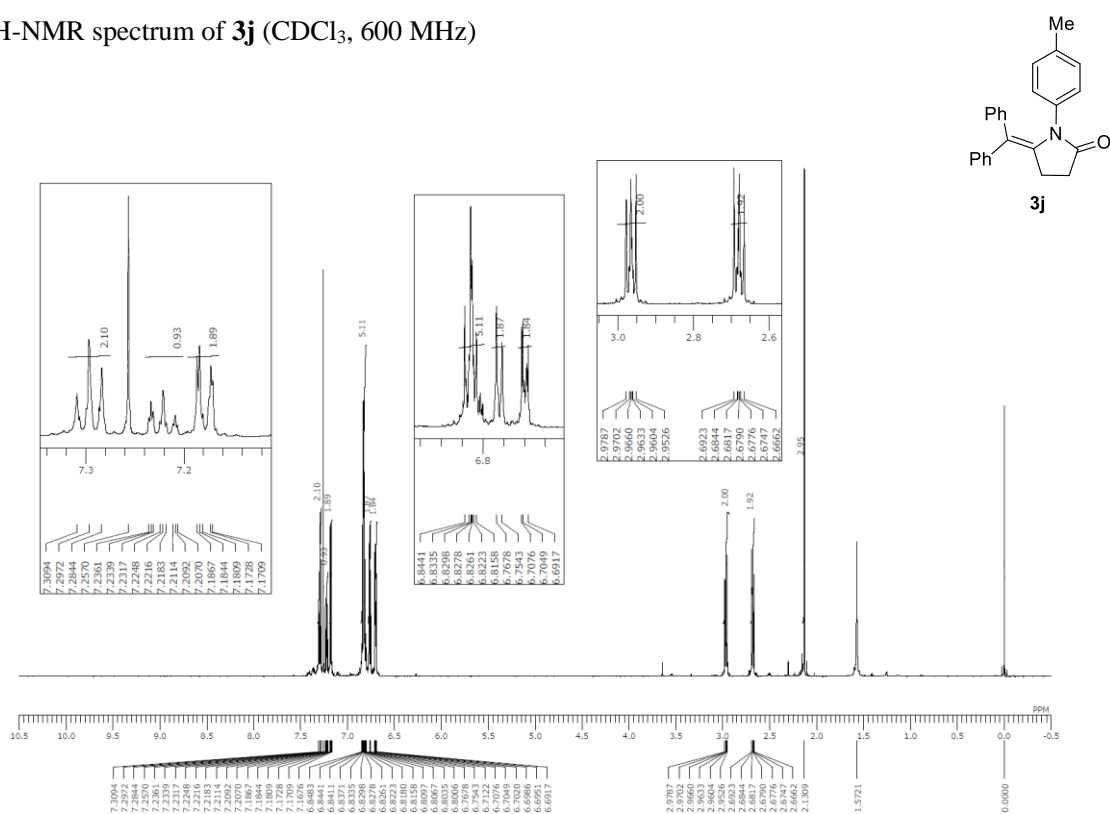

$^{13}\text{C}$ -NMR spectrum of **3j** ( $\text{CDCl}_3$ , 150 MHz)

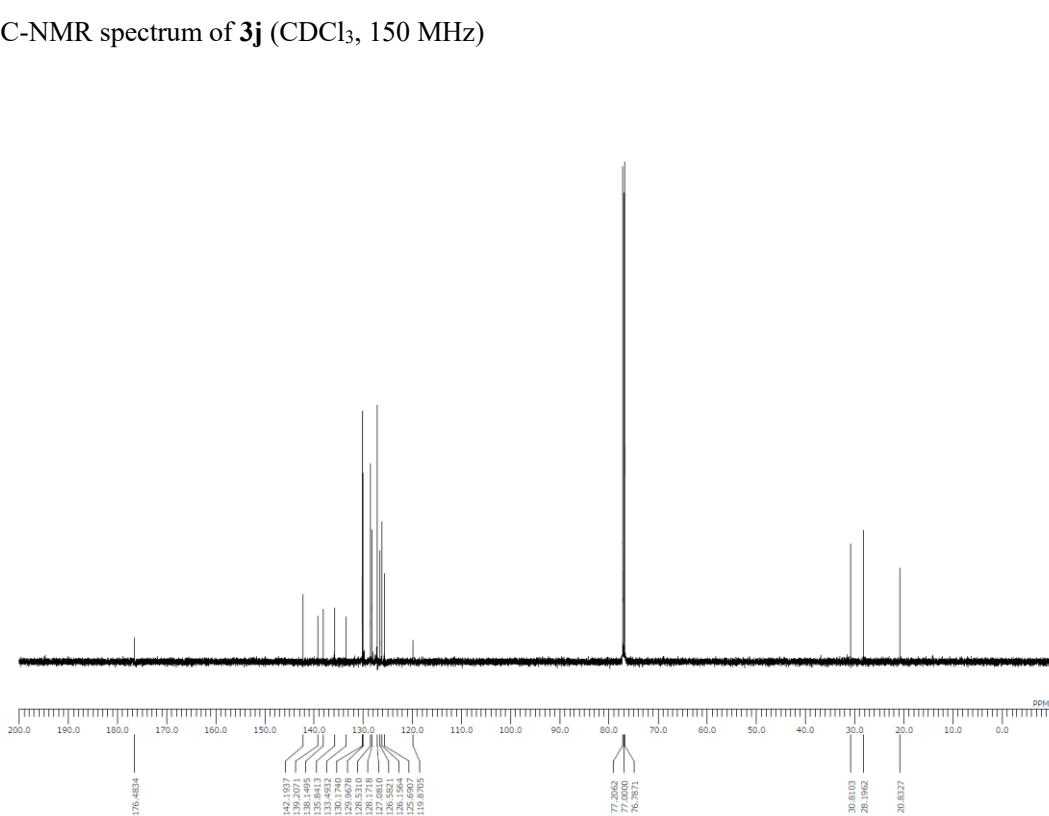

IR spectrum of **3j**

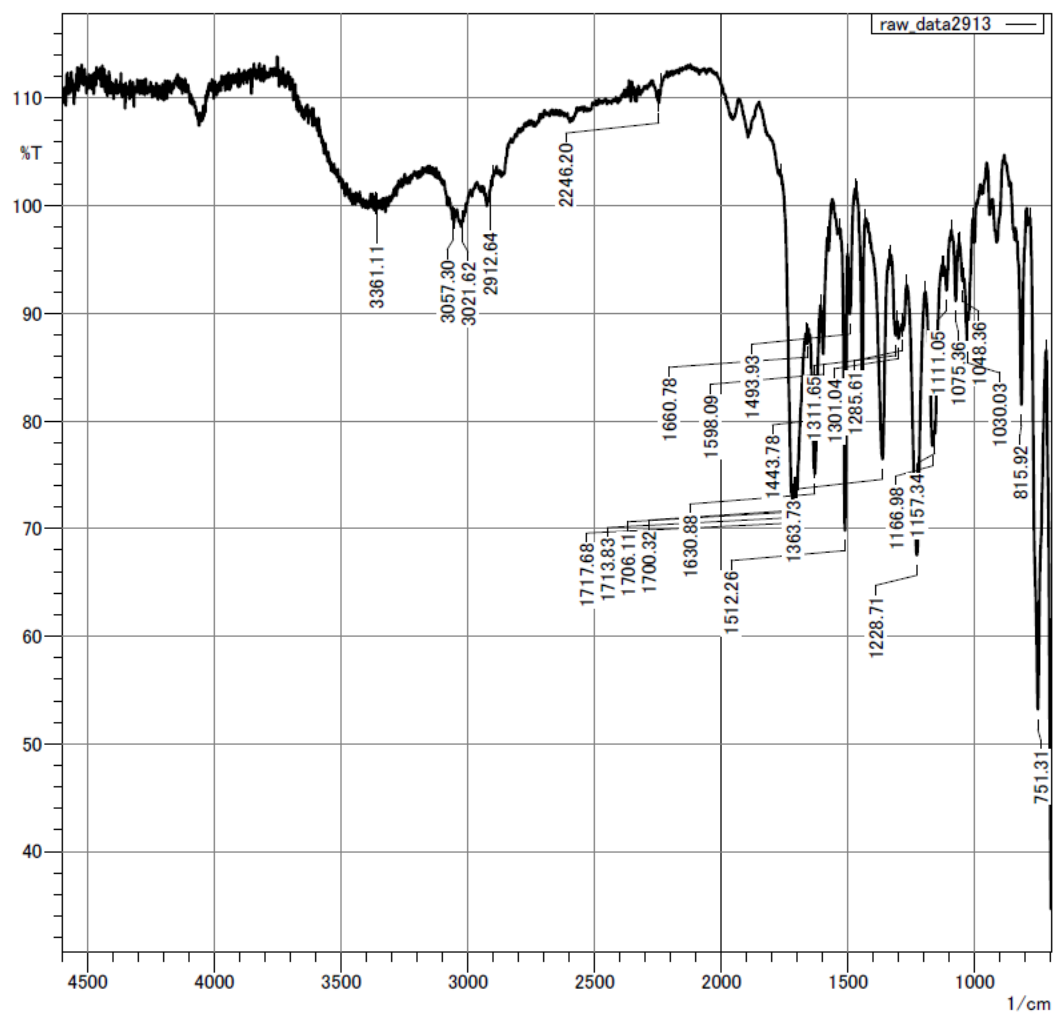

HRMS spectrum of **3j**

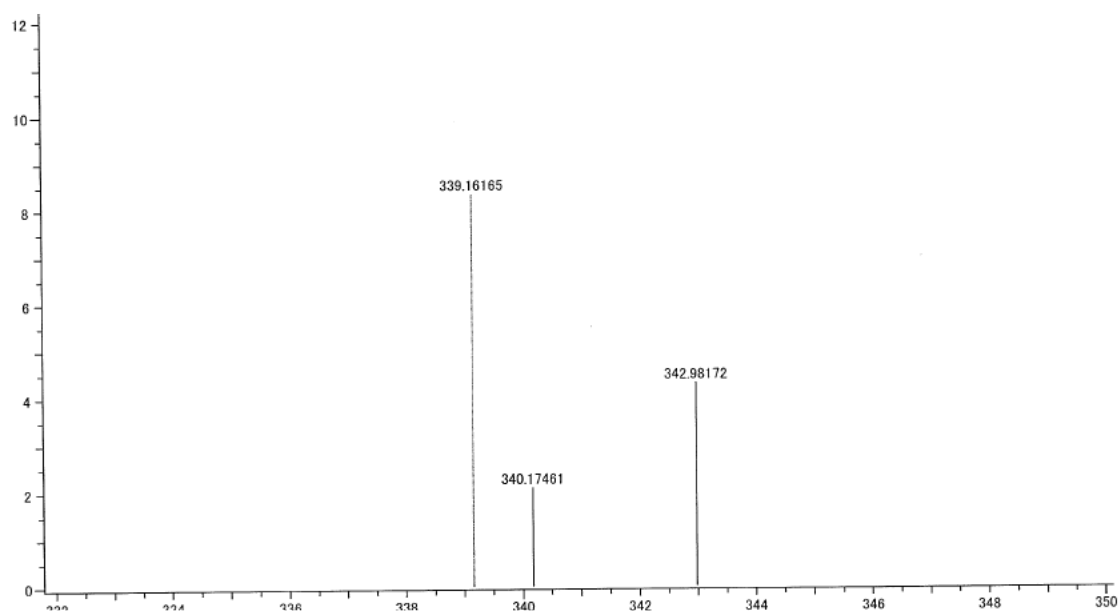

$^1\text{H}$ -NMR spectrum of **3k** (**3k** : **2k** = 92 : 8,  $\text{CDCl}_3$ , 400 MHz)

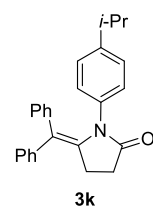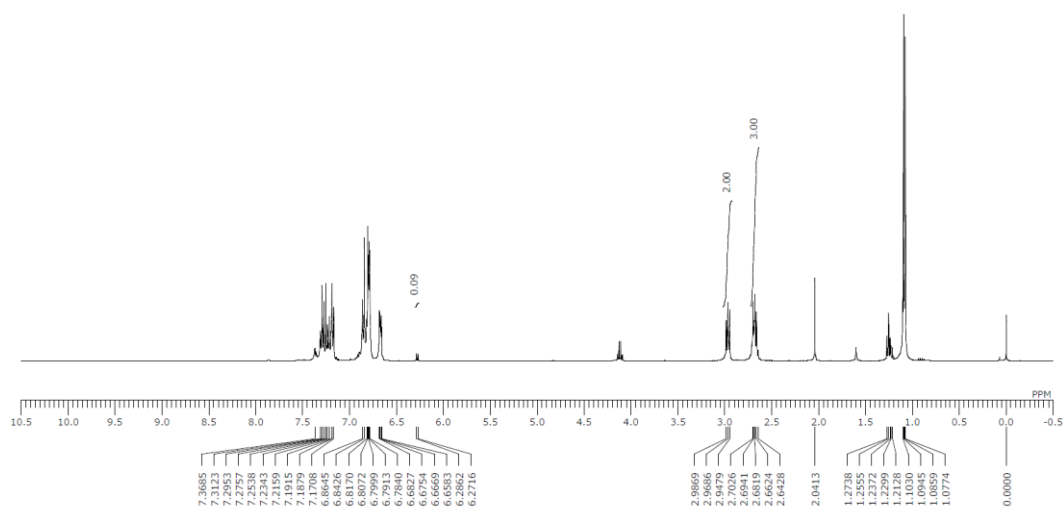

$^1\text{H}$ -NMR spectrum of **3k** ( $\text{CDCl}_3$ , 600 MHz)

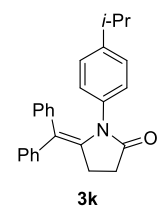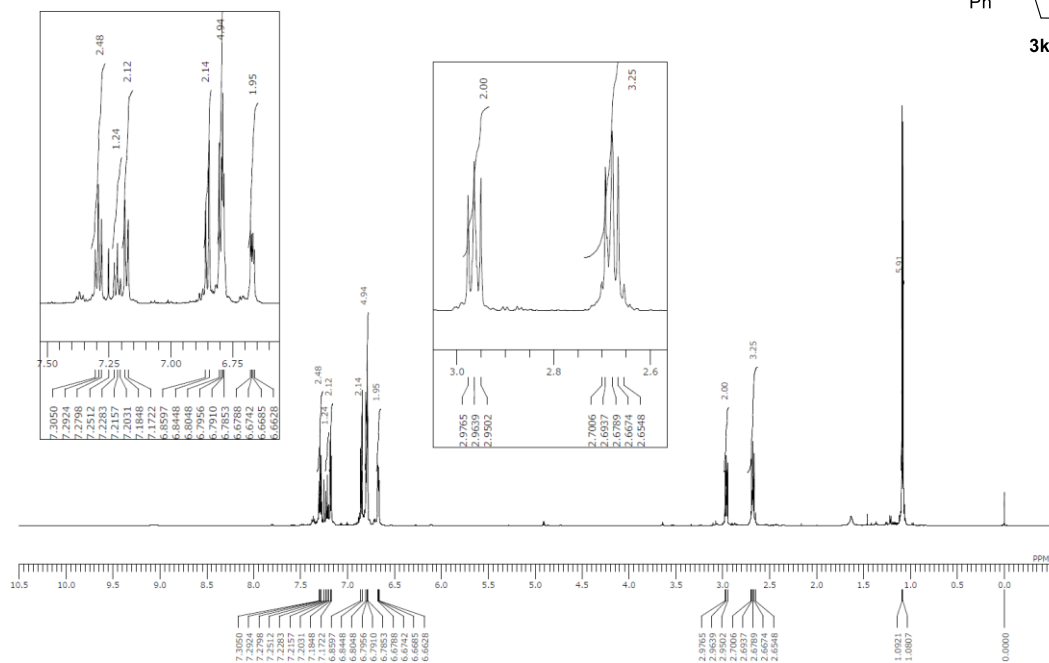

$^{13}\text{C}$ -NMR spectrum of **3k** ( $\text{CDCl}_3$ , 150 MHz)

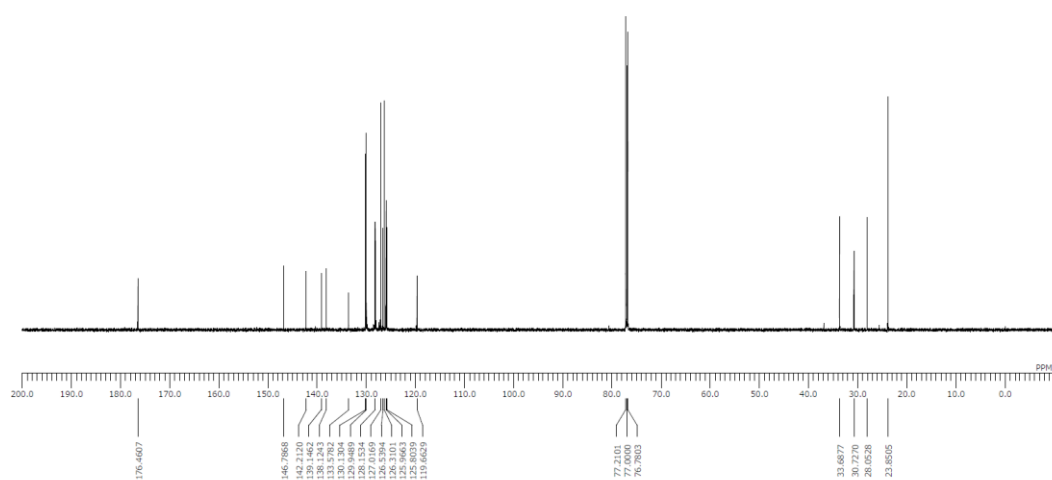

IR spectrum of **3k**

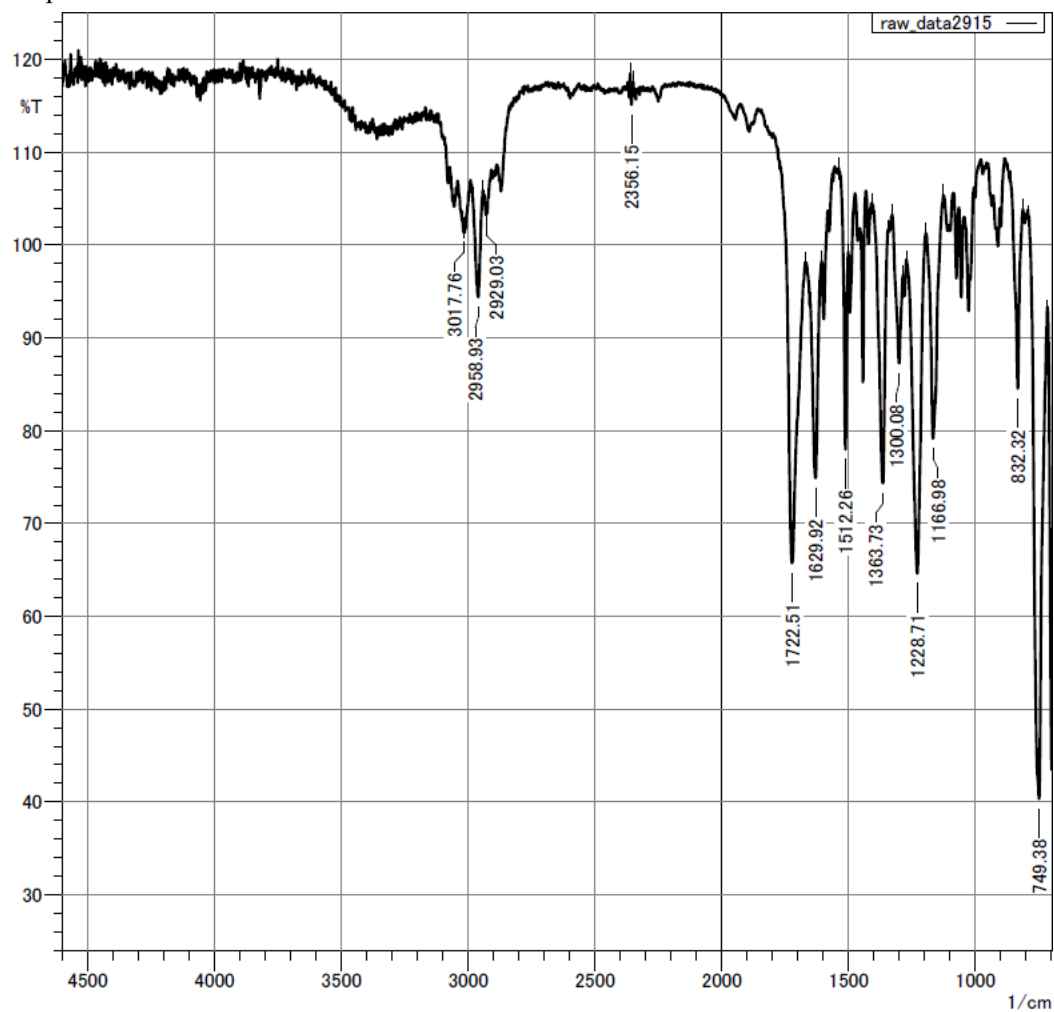

HRMS spectrum of **3k**

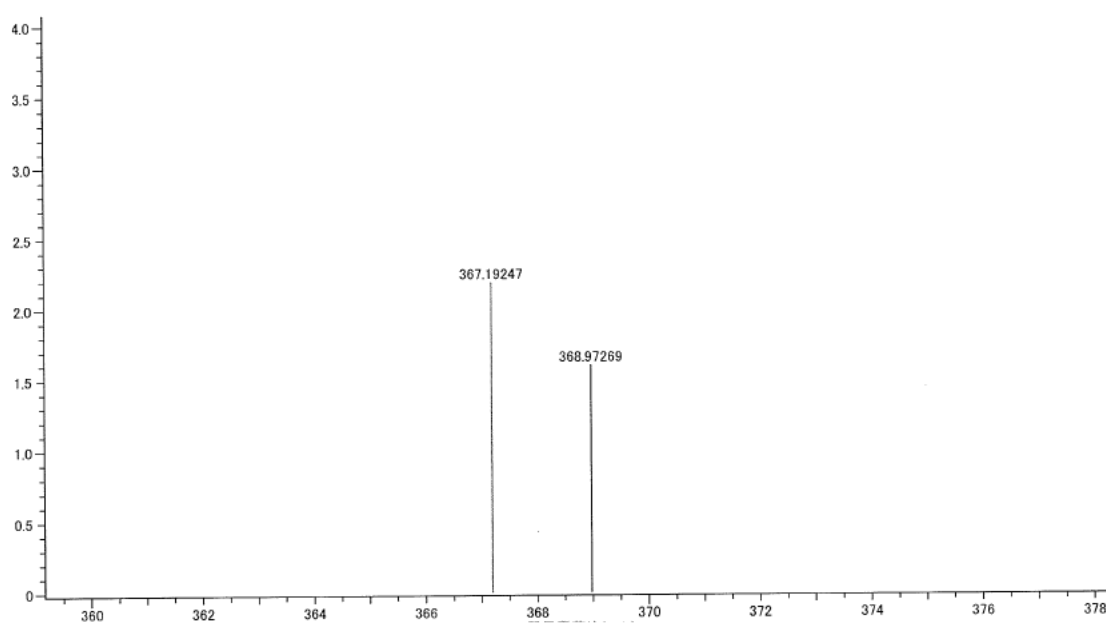

$^1\text{H}$ -NMR spectrum of **3l** (**3l** : **2l** = 93 : 7,  $\text{CDCl}_3$ , 400 MHz)

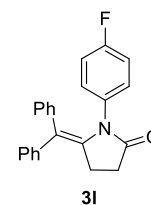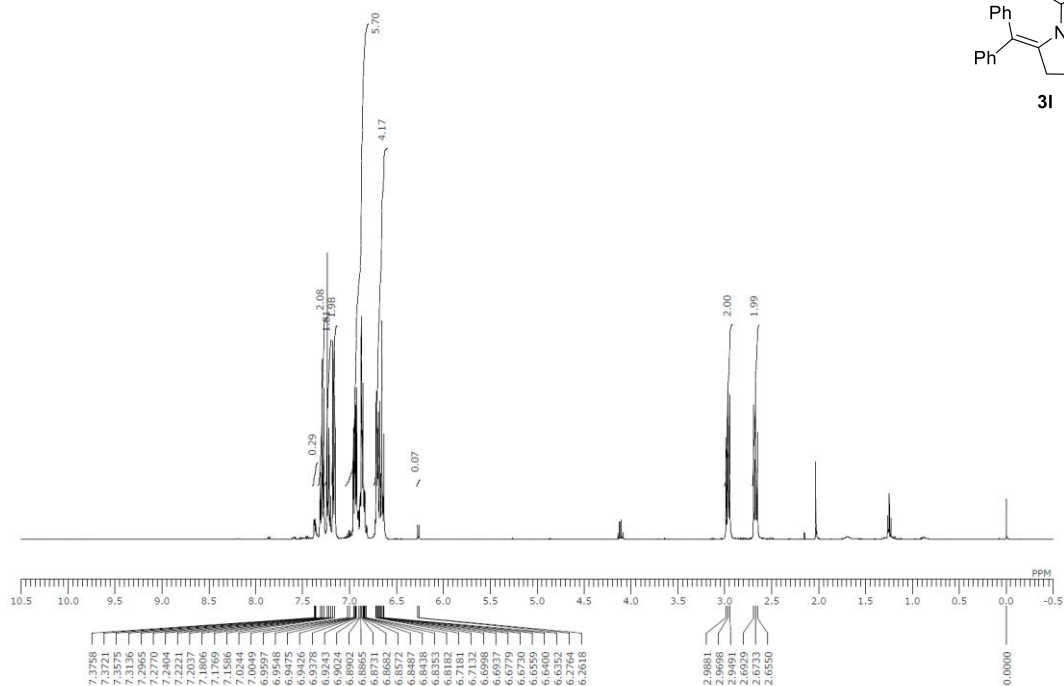

$^1\text{H}$ -NMR spectrum of **3l** ( $\text{CDCl}_3$ , 600 MHz)

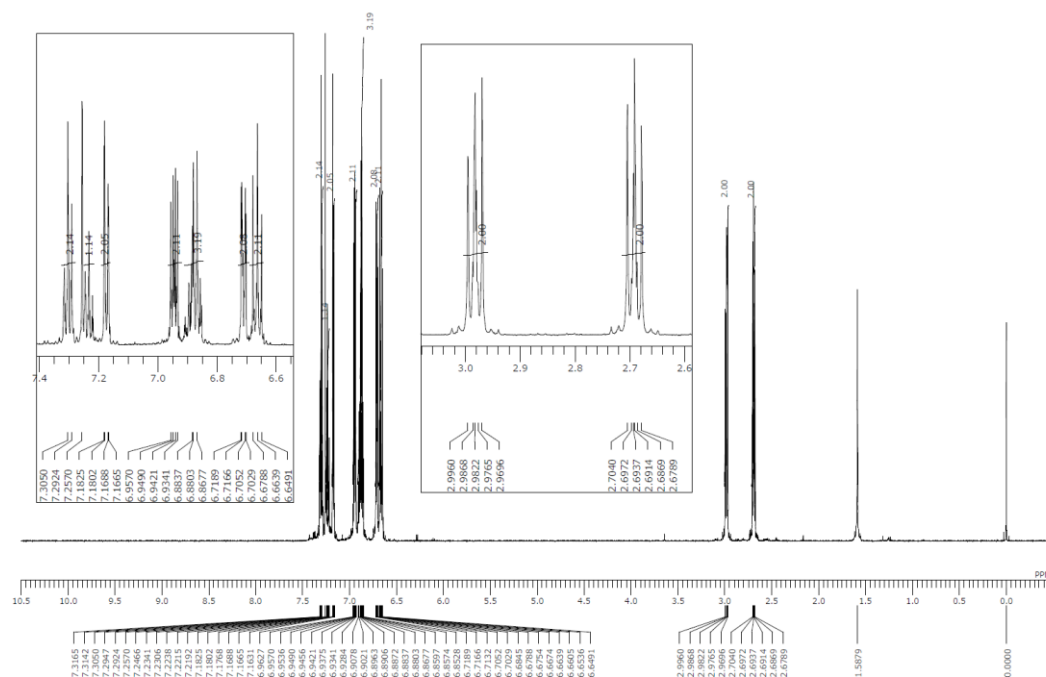



$^{13}\text{C}$ -NMR spectrum of **3I** ( $\text{CDCl}_3$ , 150 MHz)

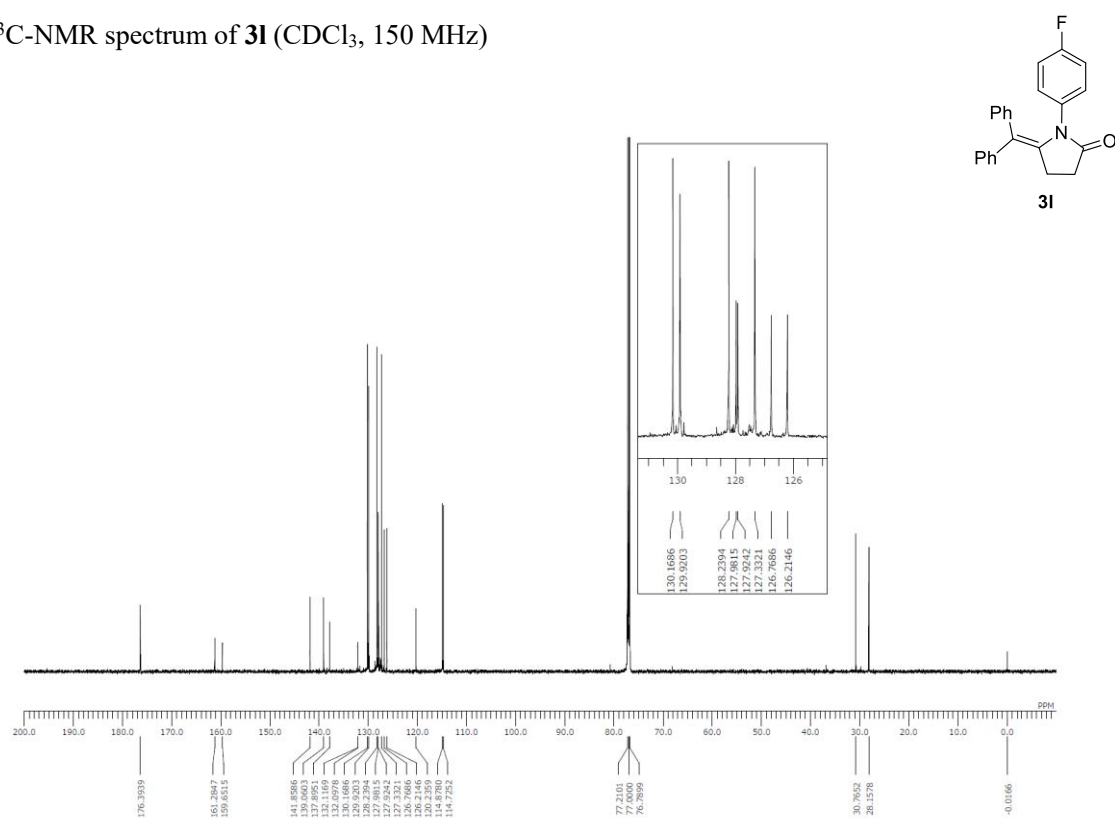

$^{19}\text{F}$ -NMR spectrum of **3I** ( $\text{CDCl}_3$ , 565 MHz)

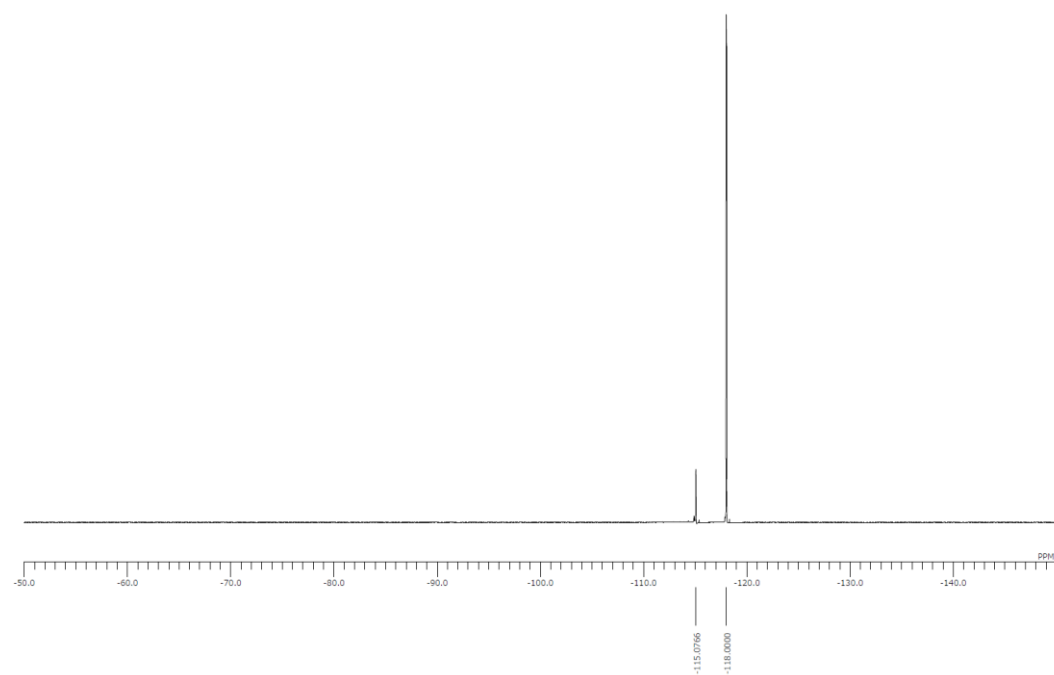

IR spectrum of **31**

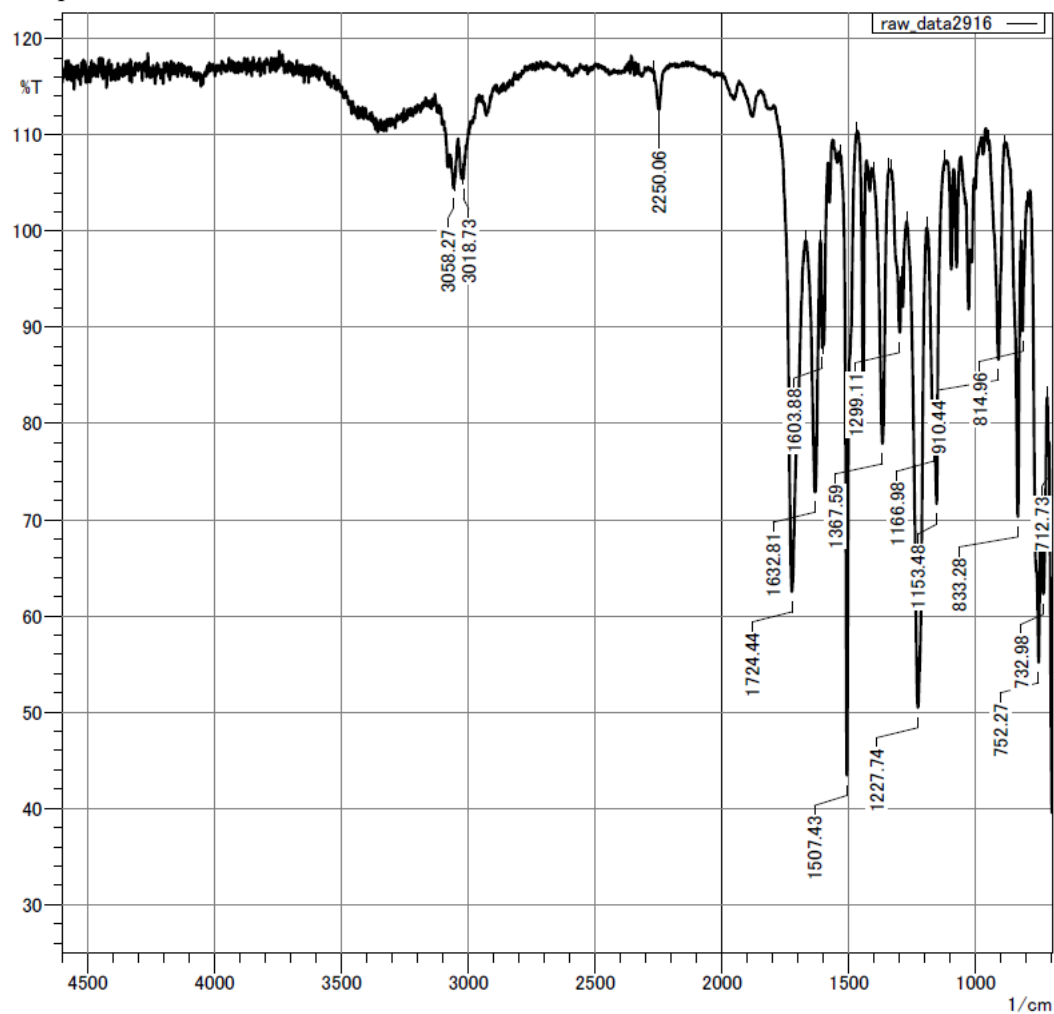

HRMS spectrum of **31**

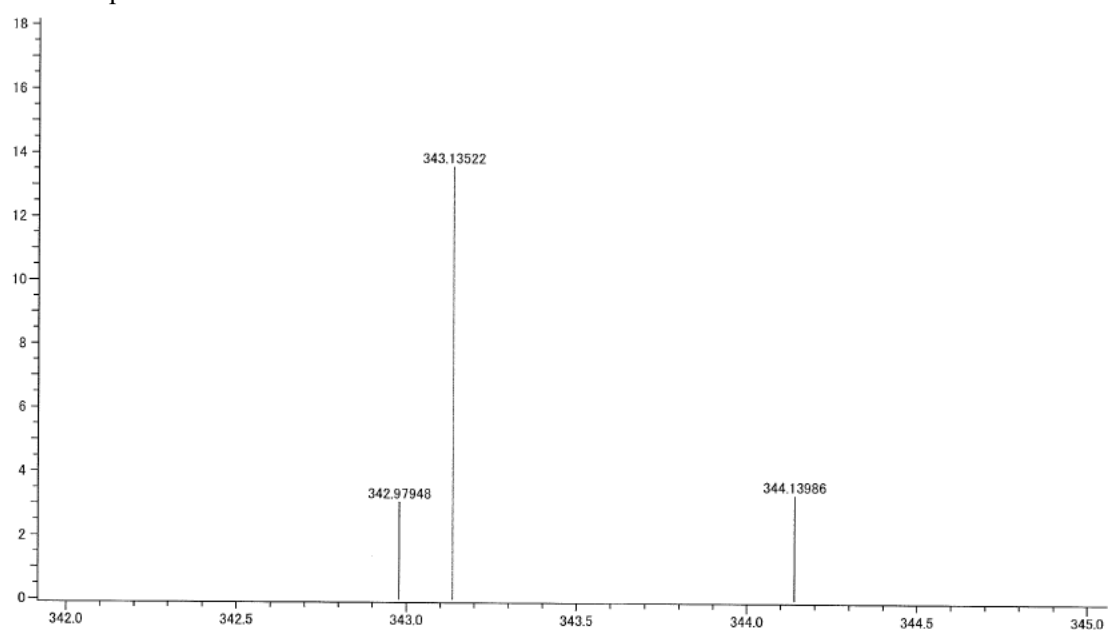

$^1\text{H}$ -NMR spectrum of **3m** ( $\text{CDCl}_3$ , 600 MHz)

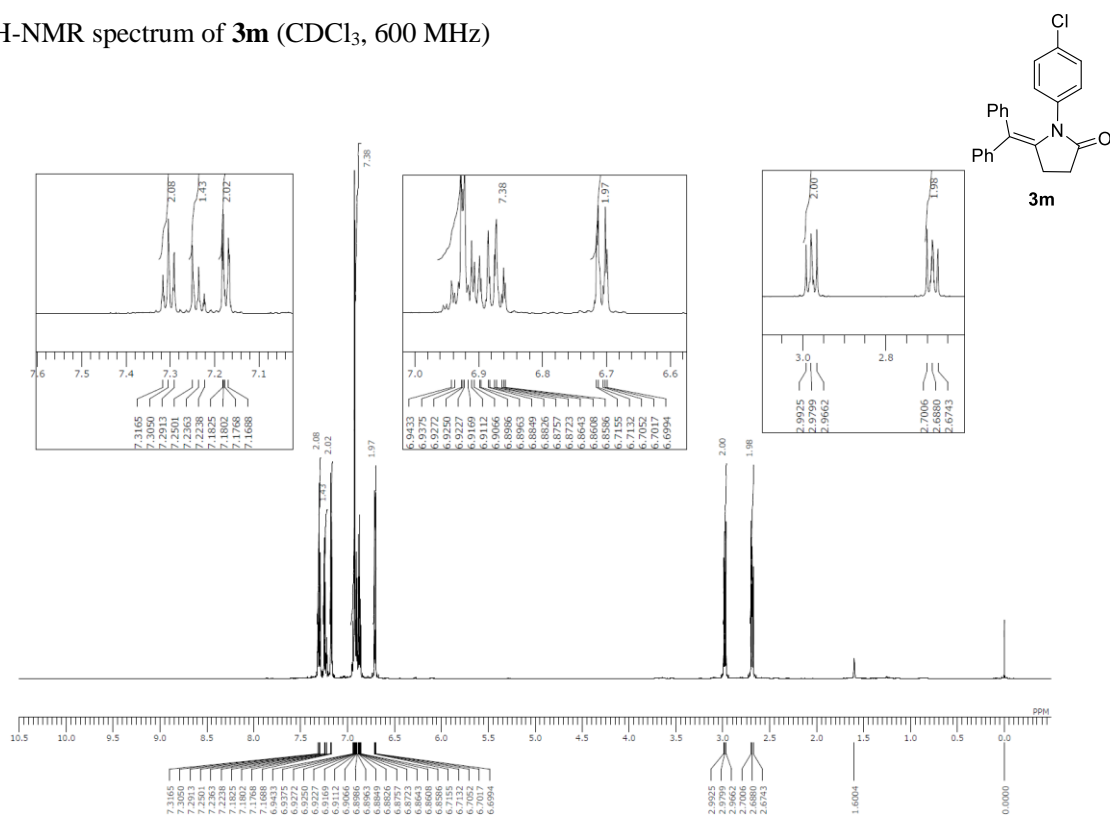

$^{13}\text{C}$ -NMR spectrum of **3m** ( $\text{CDCl}_3$ , 150 MHz)

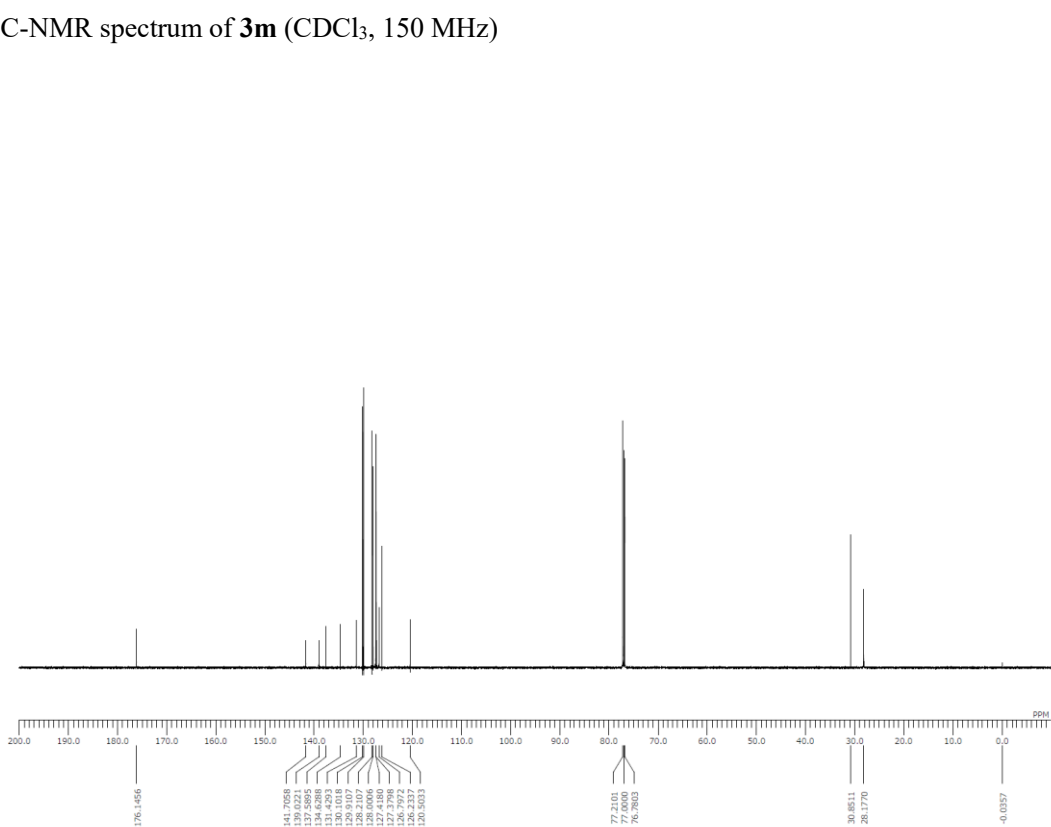

IR spectrum of **3m**

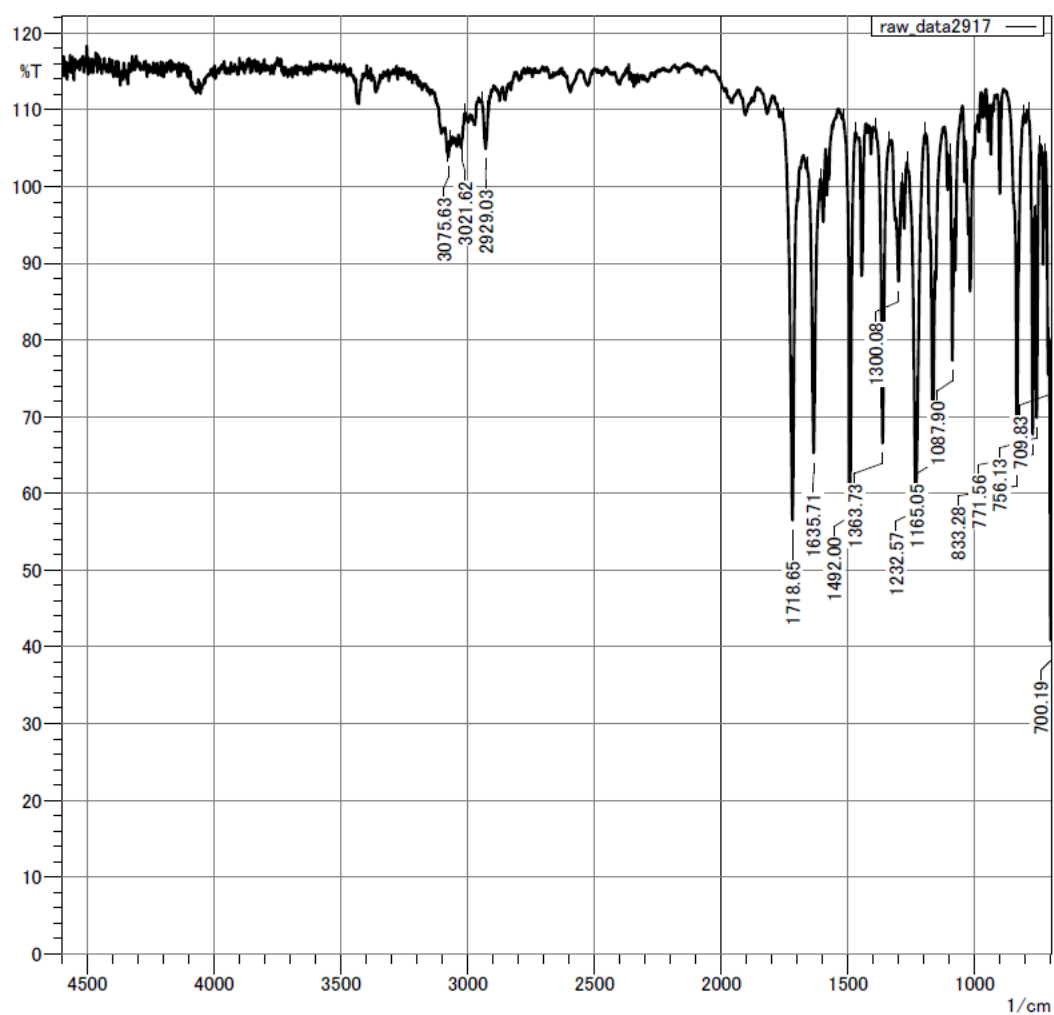

HRMS spectrum of **3m**

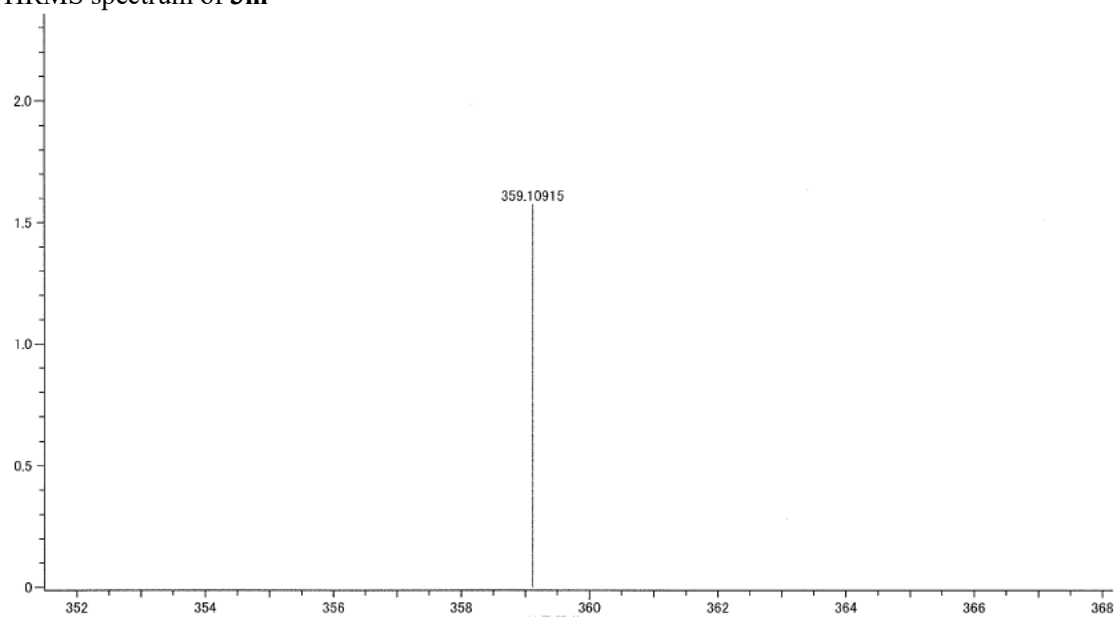

$^1\text{H}$ -NMR spectrum of **3n** (**3n** : **2n** = 96 : 4,  $\text{CDCl}_3$ , 400 MHz)

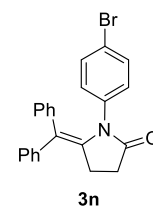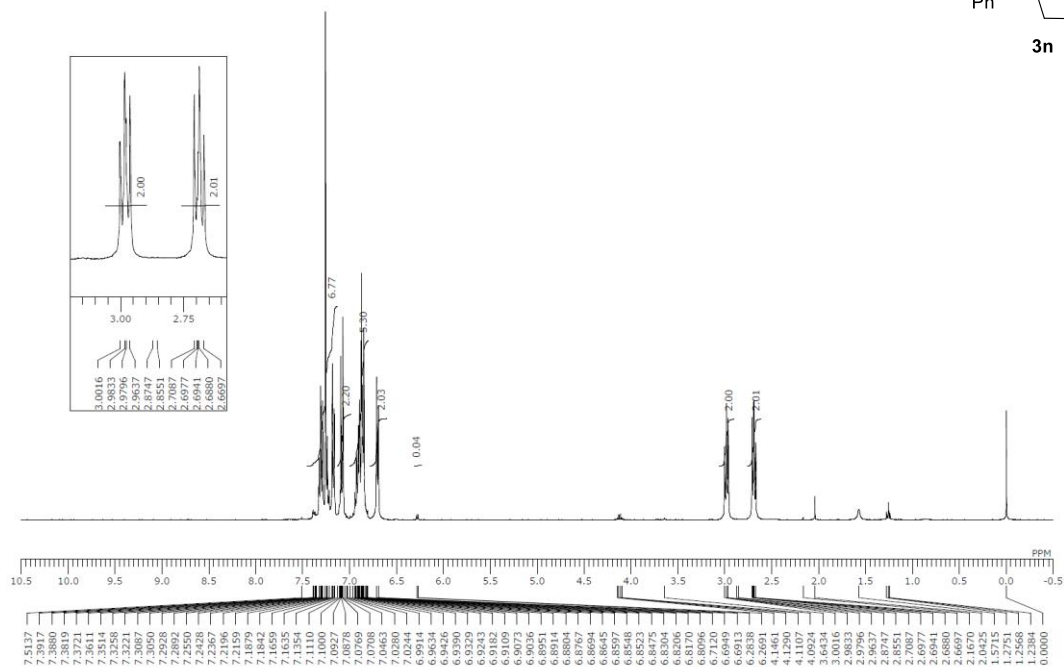

$^1\text{H}$ -NMR spectrum of **3n** ( $\text{CDCl}_3$ , 600 MHz)

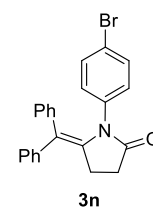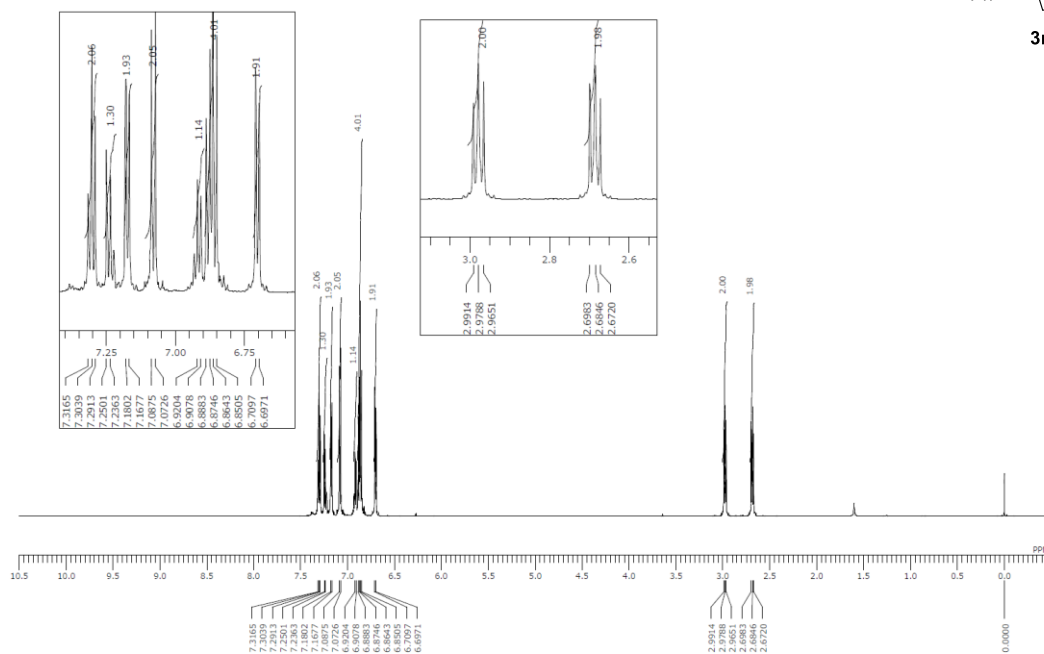

$^{13}\text{C}$ -NMR spectrum of **3n** ( $\text{CDCl}_3$ , 150 MHz)

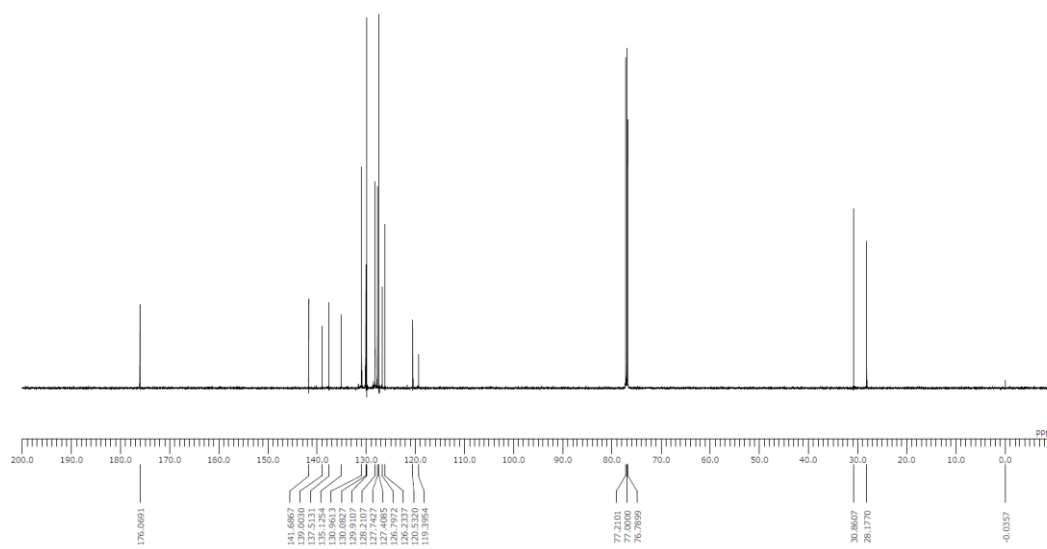

IR spectrum of **3n**

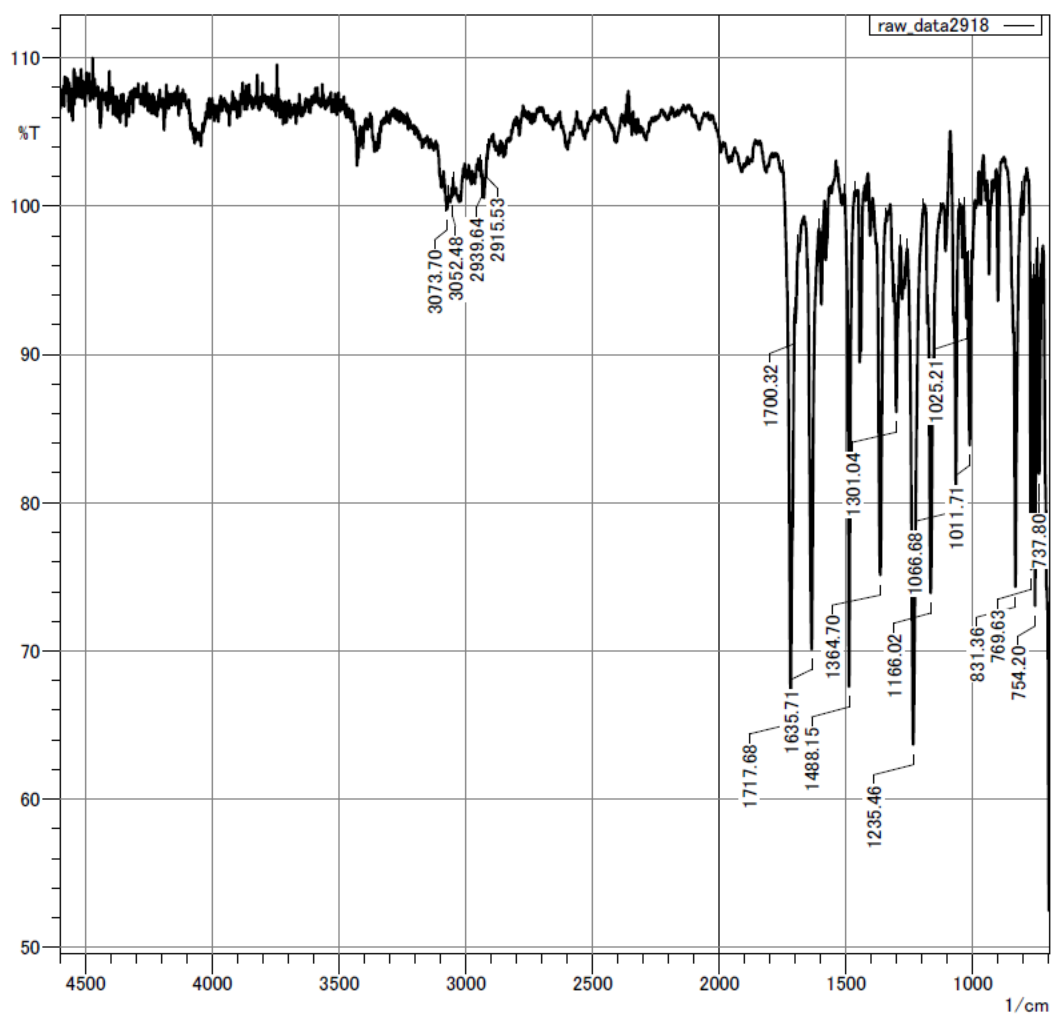

HRMS spectrum of **3n**

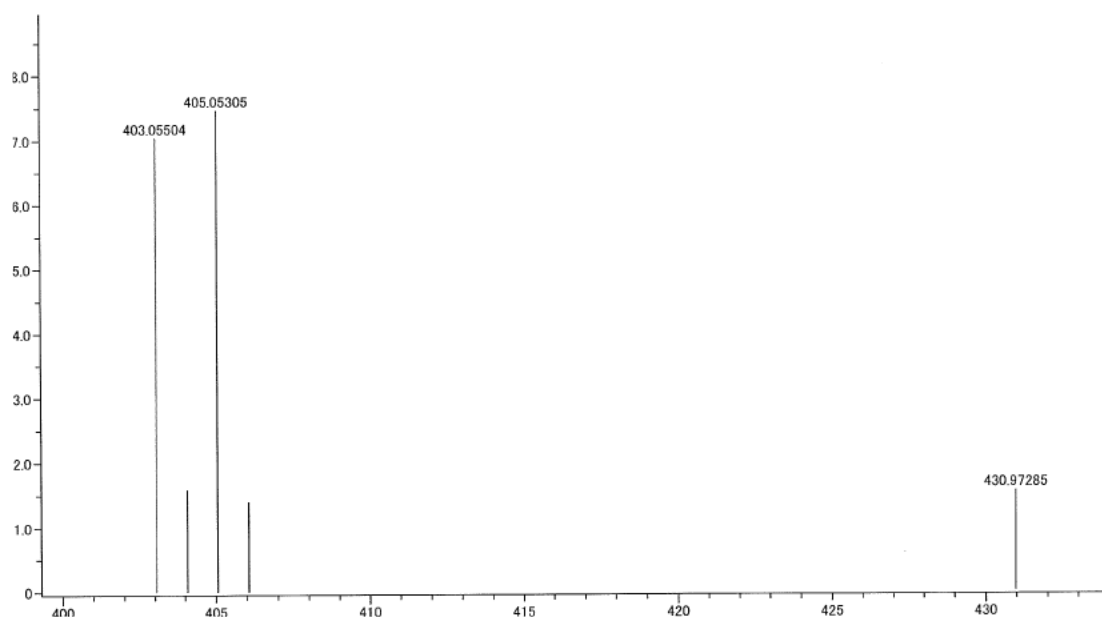

$^1\text{H}$ -NMR spectrum of **3o** (**3o** : **2o** = 95 : 5,  $\text{CDCl}_3$ , 400 MHz)

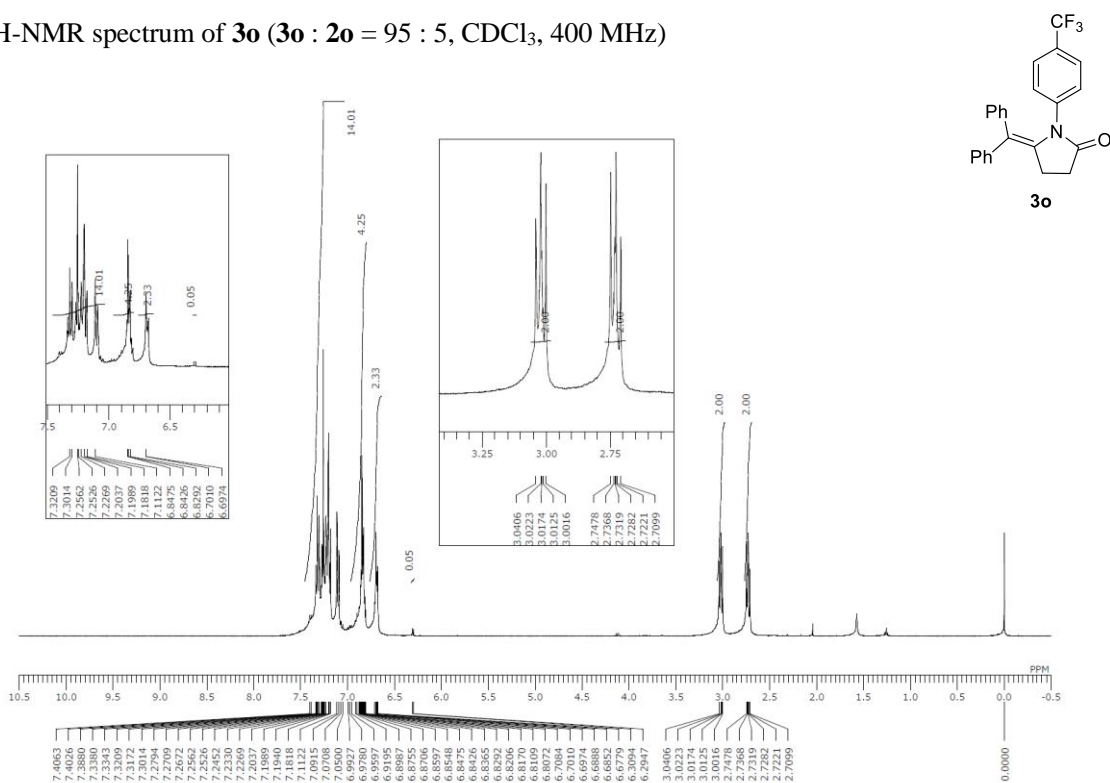

$^1\text{H}$ -NMR spectrum of **3o** ( $\text{CDCl}_3$ , 600 MHz)

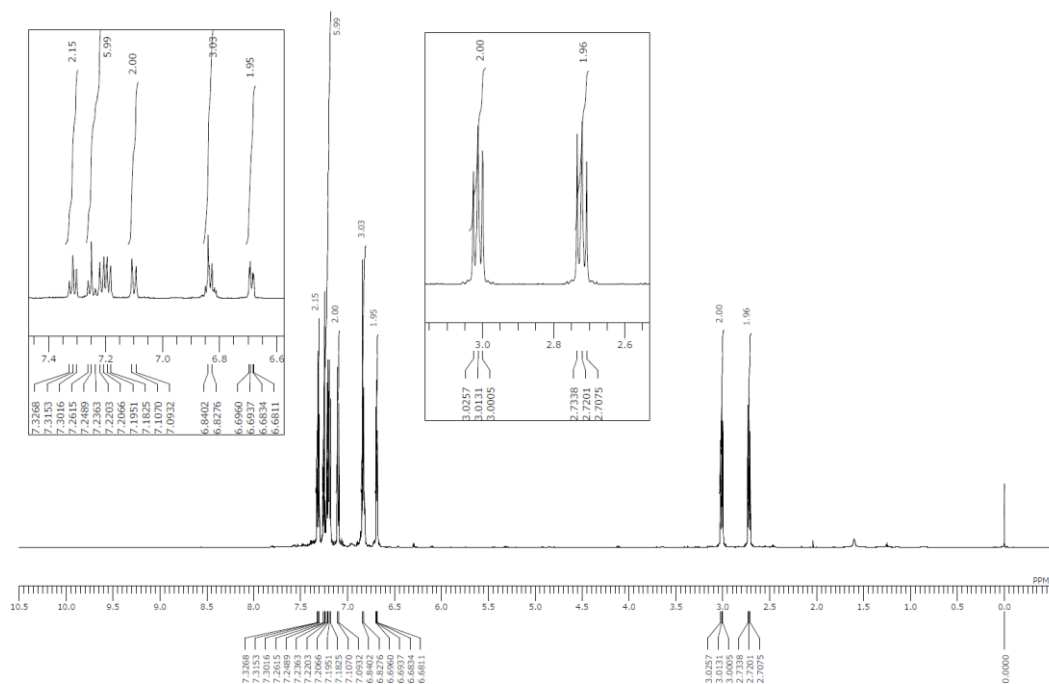



$^{13}\text{C}$ -NMR spectrum of **3o** ( $\text{CDCl}_3$ , 150 MHz)

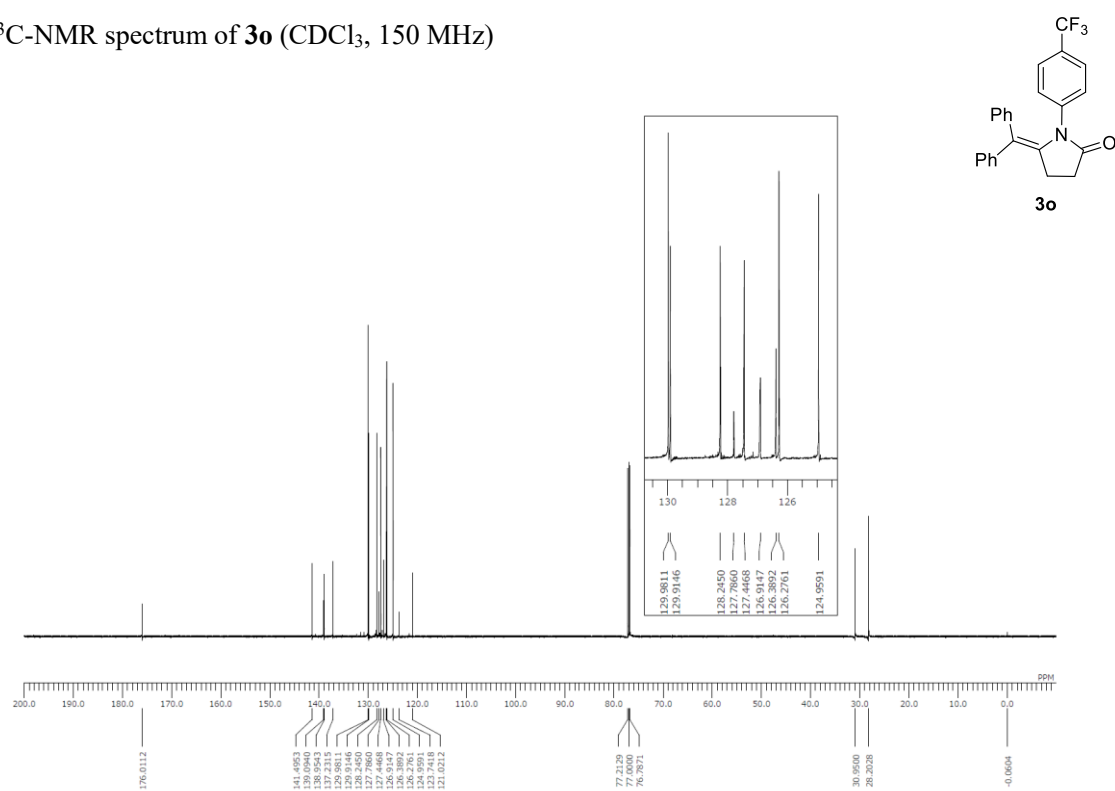

$^{19}\text{F}$ -NMR spectrum of **3o** ( $\text{CDCl}_3$ , 565 MHz)

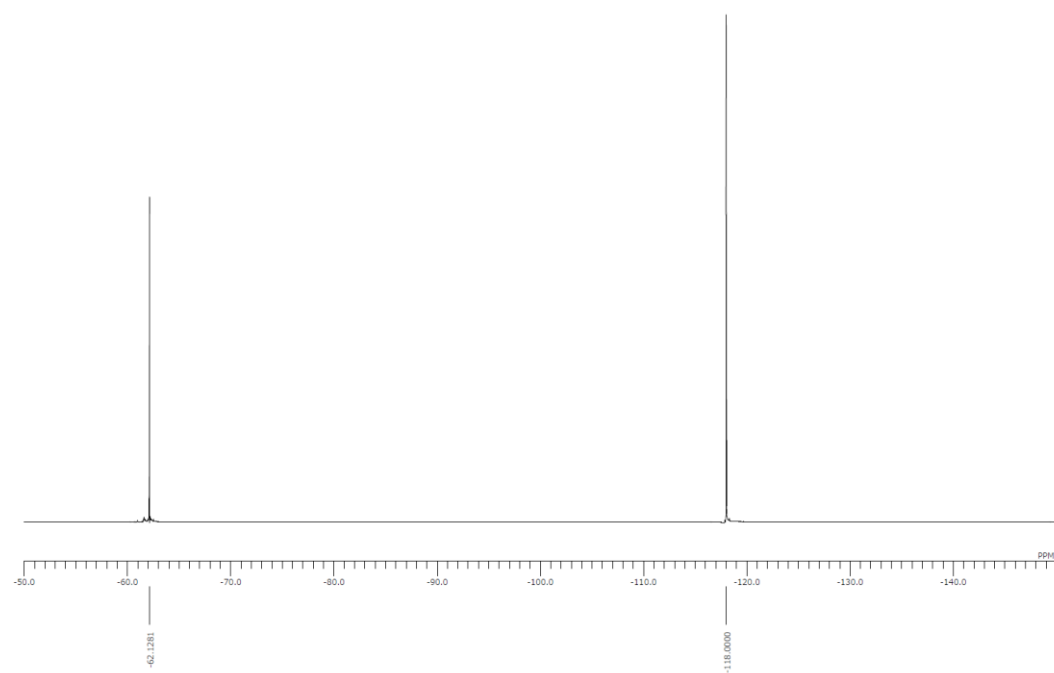

IR spectrum of **3o**

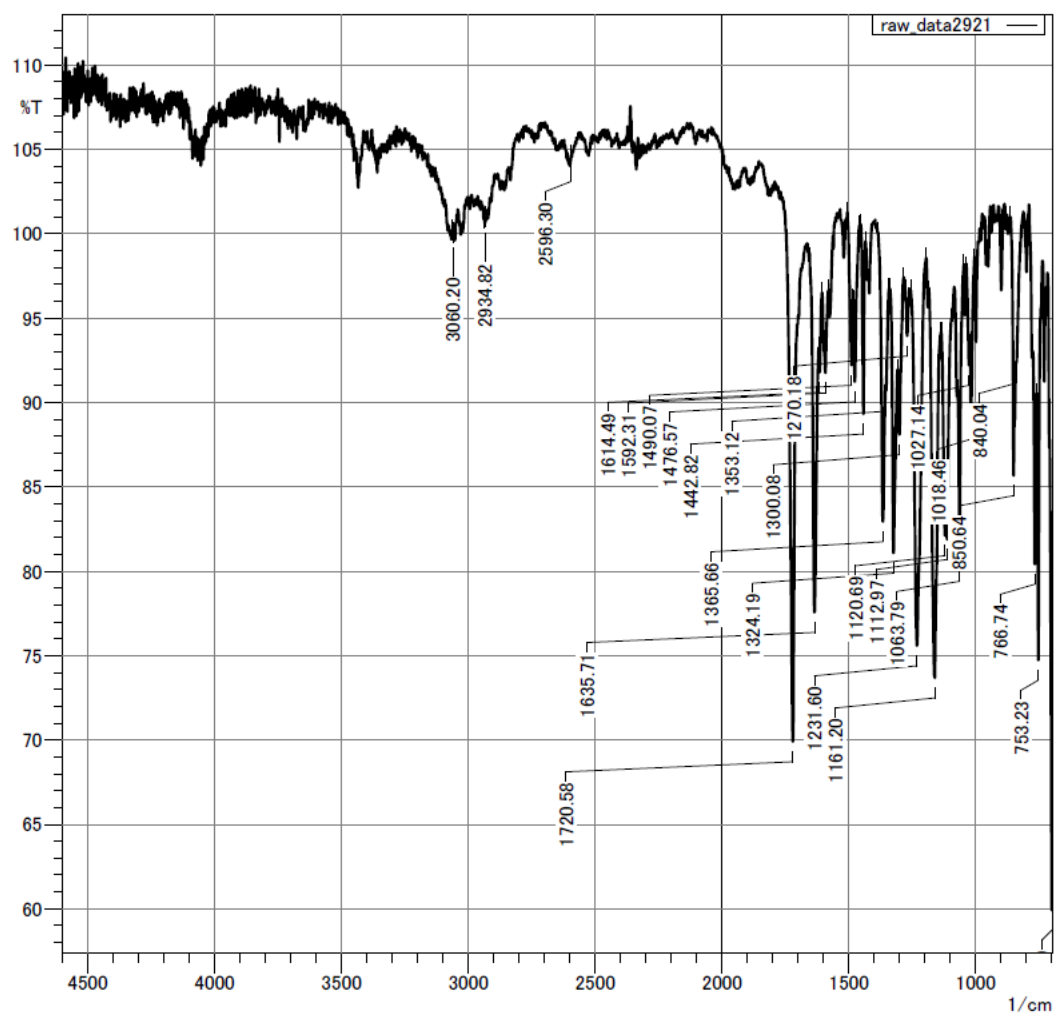

HRMS spectrum of **3o**

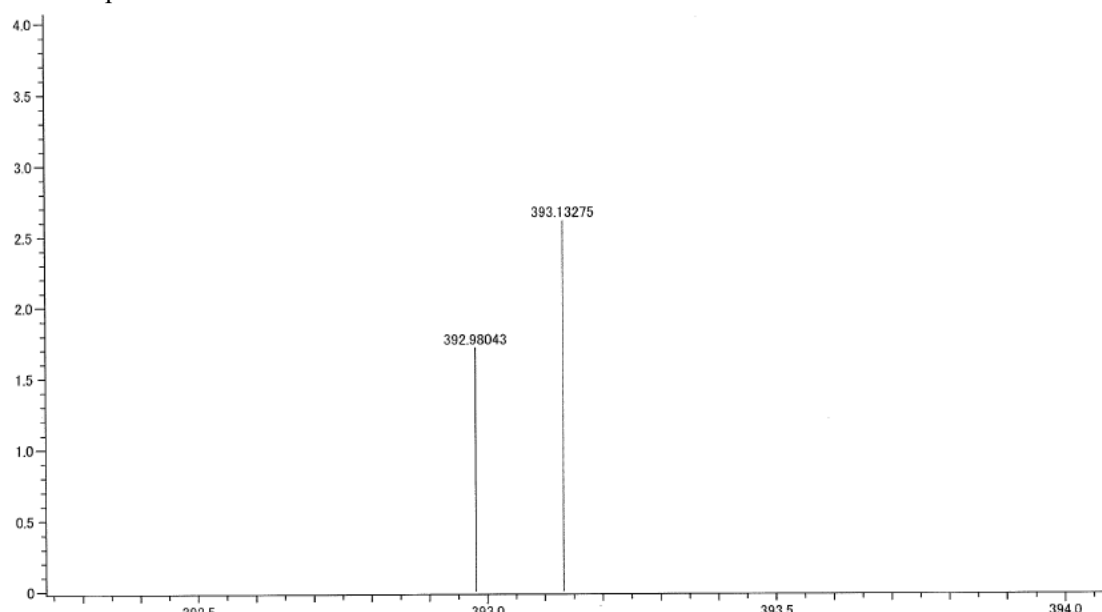

$^1\text{H}$ -NMR spectrum of **3p** (**3p** : **2p** = 98 : 2,  $\text{CDCl}_3$ , 400 MHz)

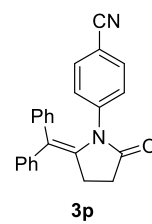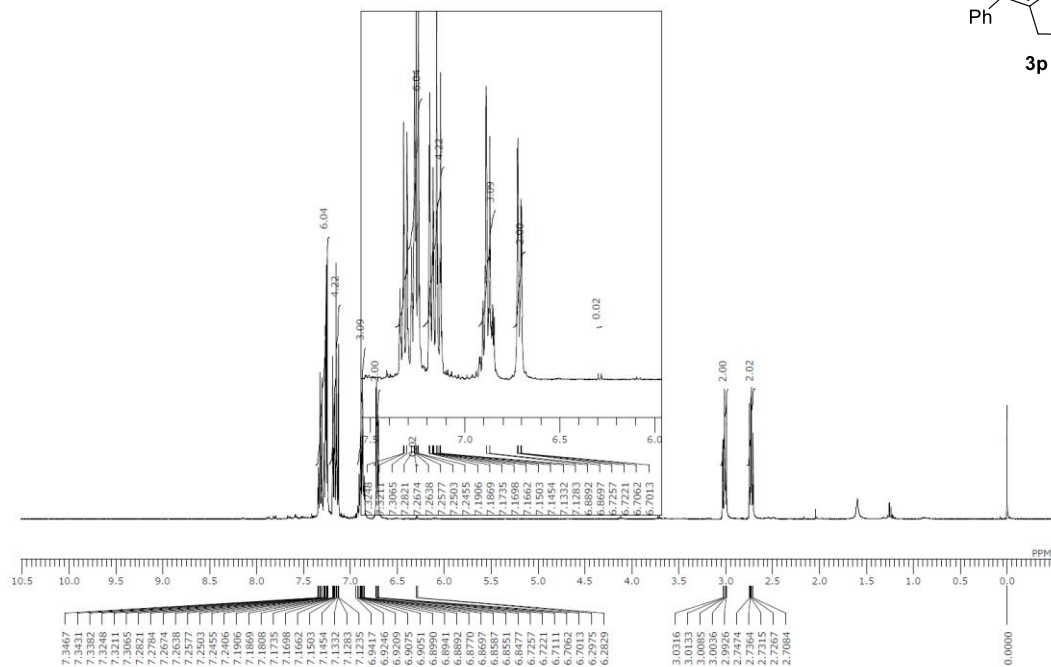

$^1\text{H}$ -NMR spectrum of **3p** ( $\text{CDCl}_3$ , 600 MHz)

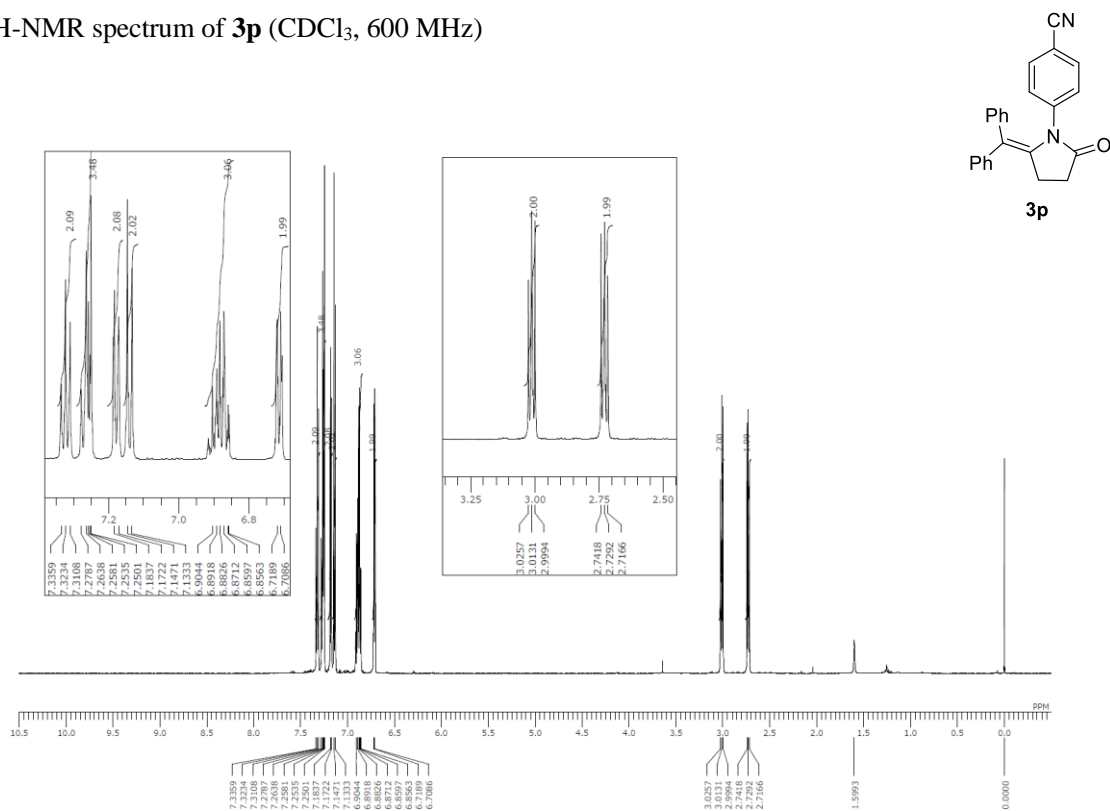

$^{13}\text{C}$ -NMR spectrum of **3p** ( $\text{CDCl}_3$ , 150 MHz)

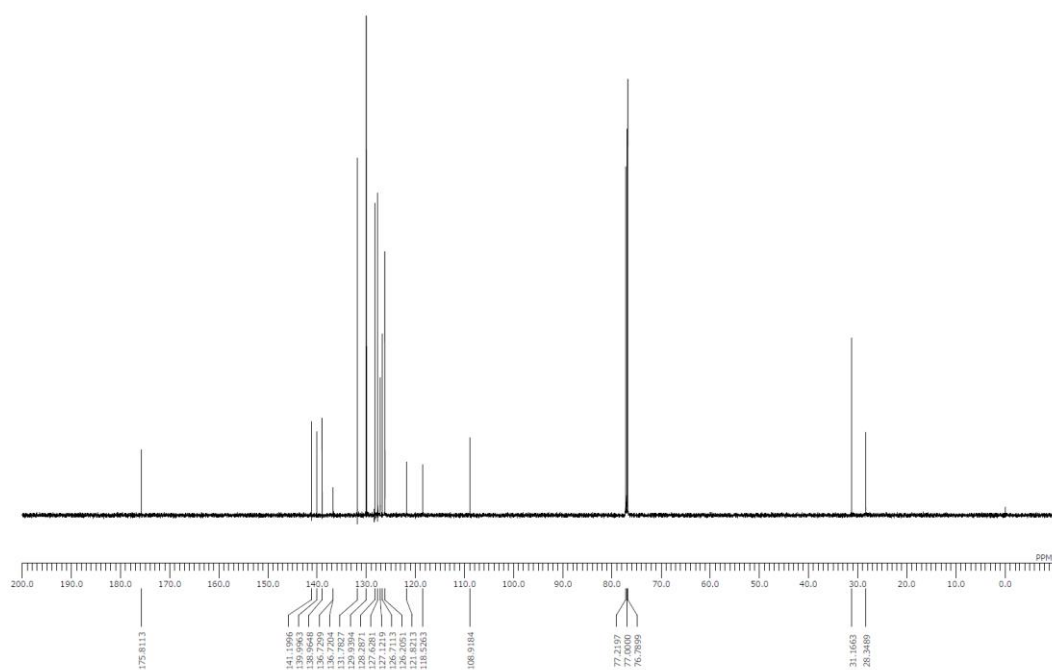

IR spectrum of **3p**

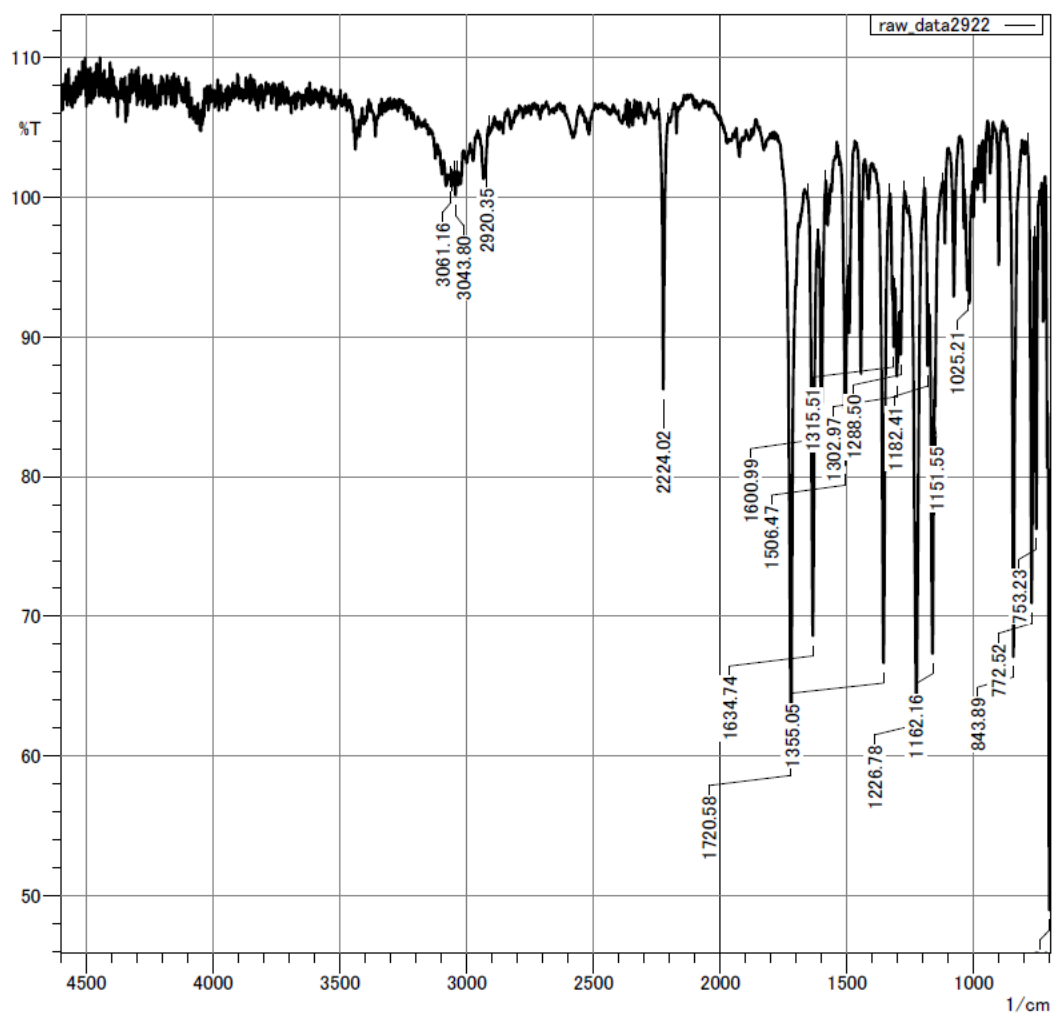

HRMS spectrum of **3p**

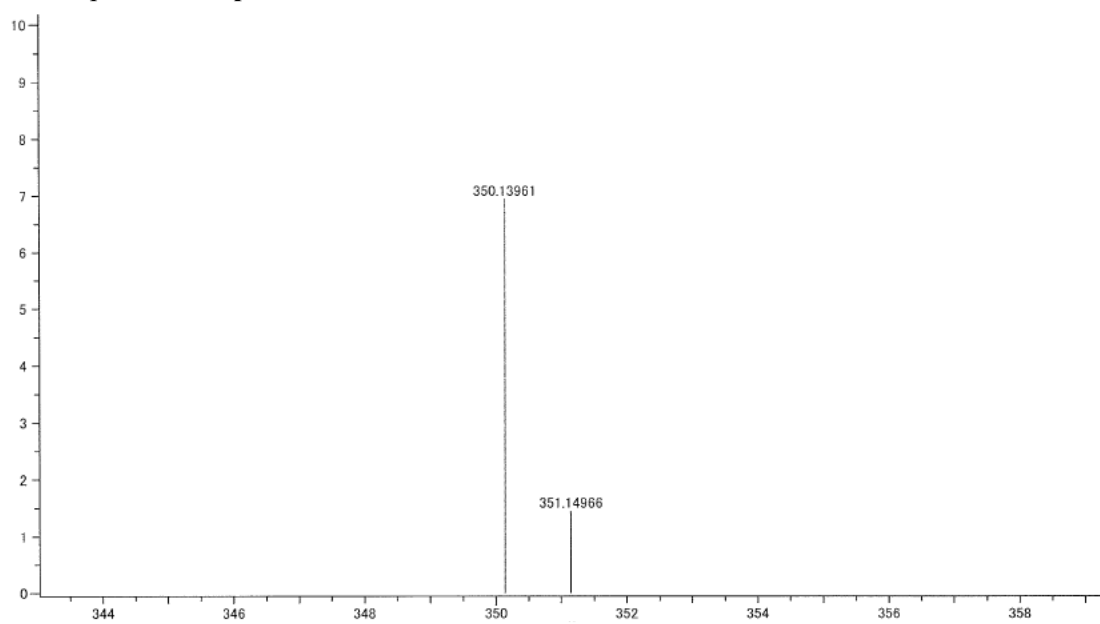

$^1\text{H}$ -NMR spectrum of **3q** (**3q** : **2q** = 98 : 2,  $\text{CDCl}_3$ , 400 MHz)

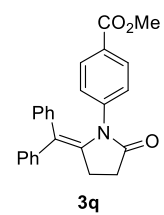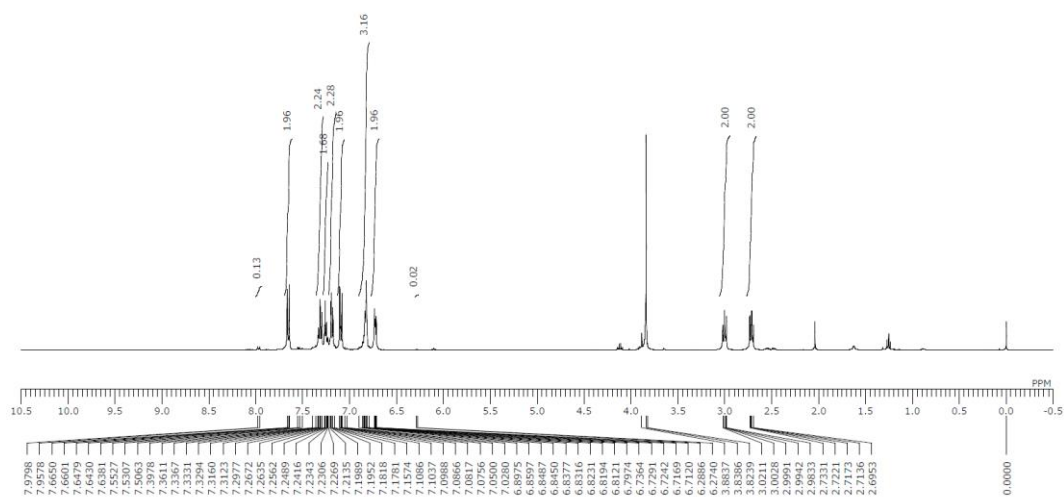

$^1\text{H}$ -NMR spectrum of **3q** ( $\text{CDCl}_3$ , 600 MHz)

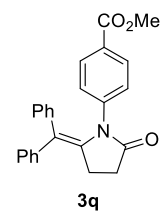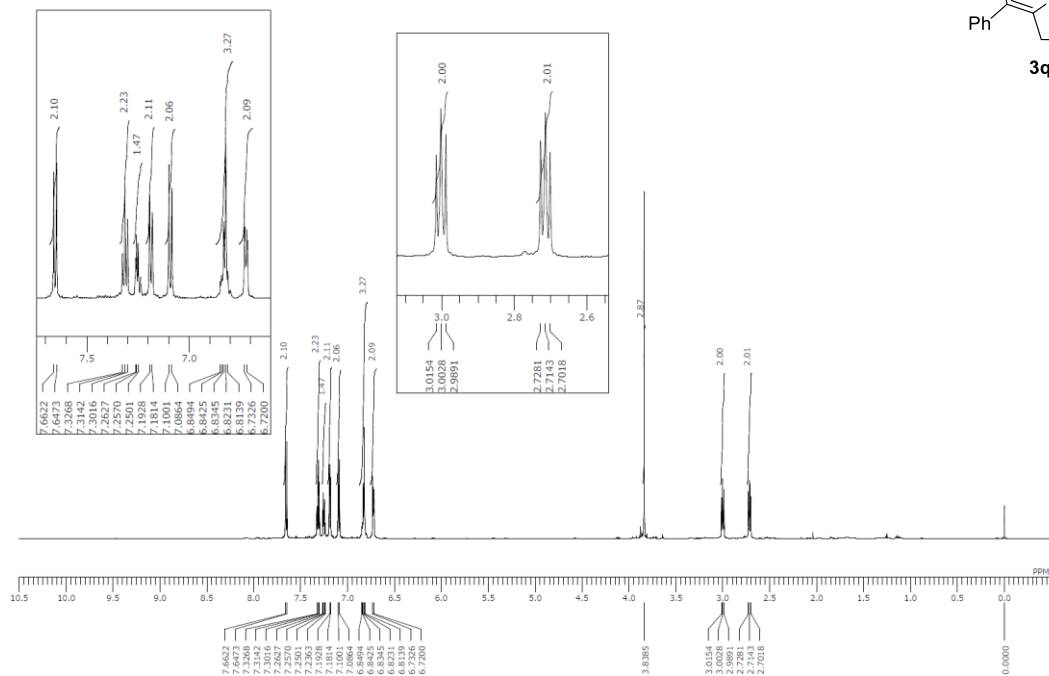

$^{13}\text{C}$ -NMR spectrum of **3q** ( $\text{CDCl}_3$ , 150 MHz)

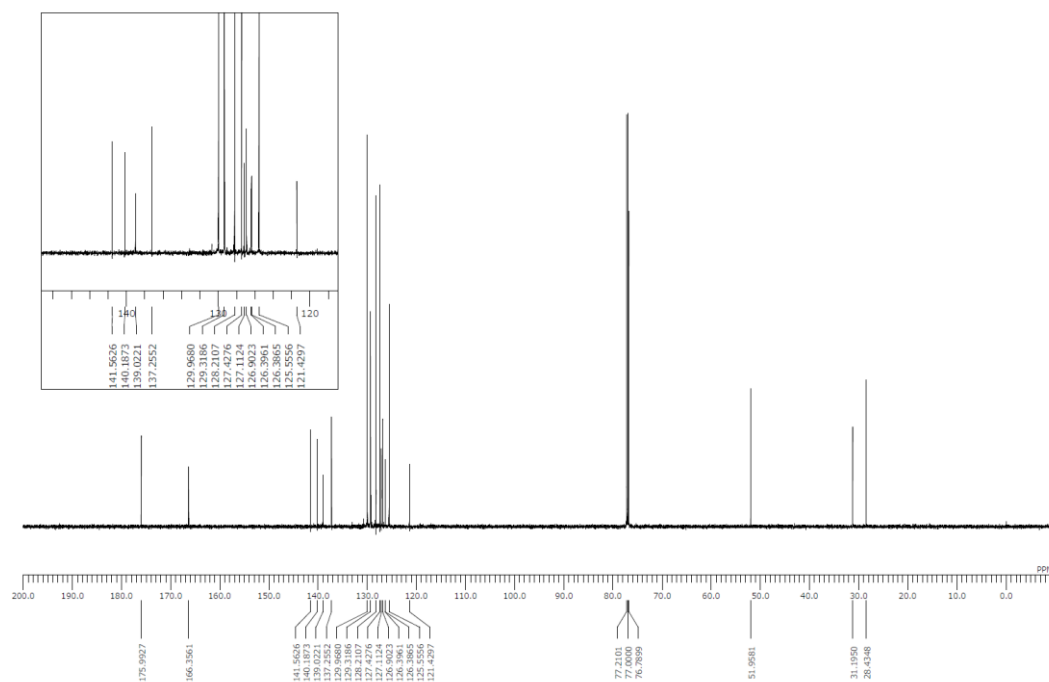

IR spectrum of **3q**

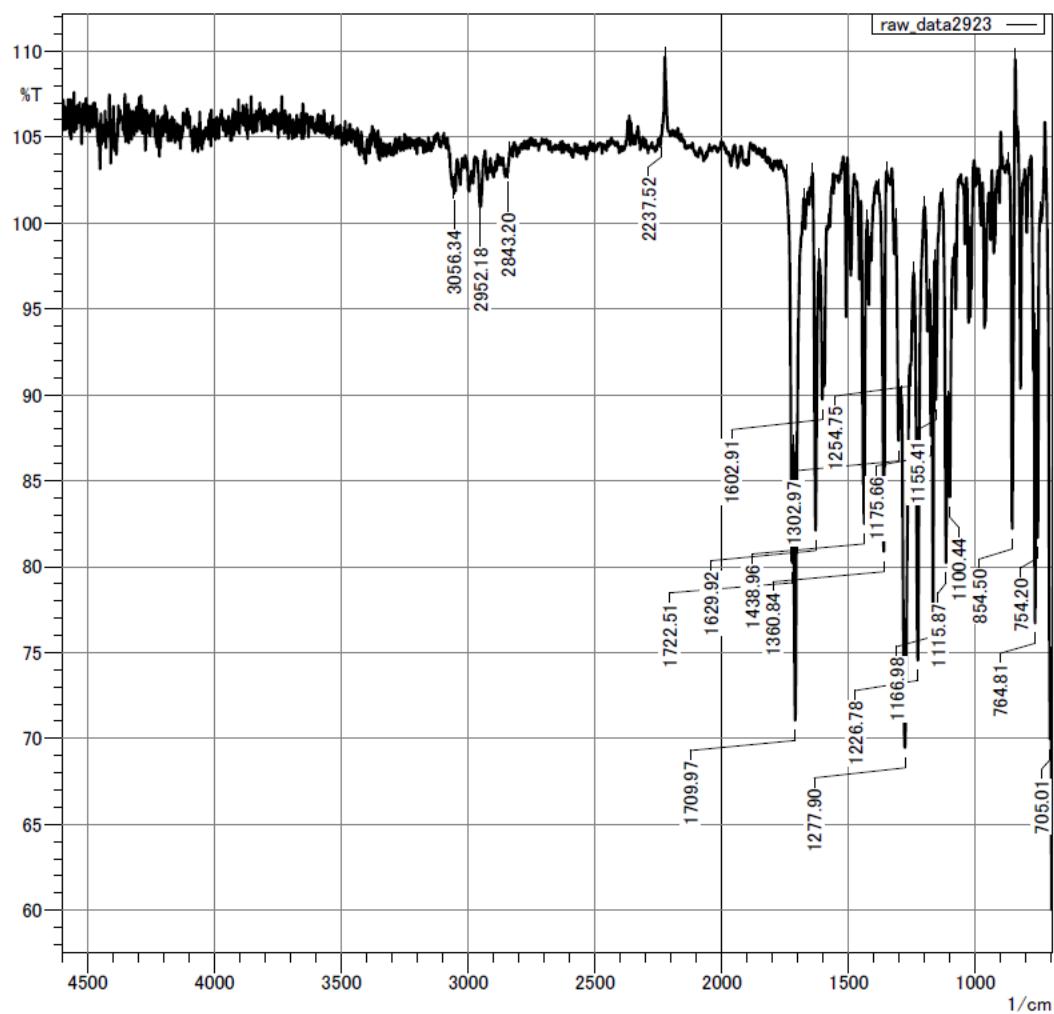

HRMS spectrum of **3q**

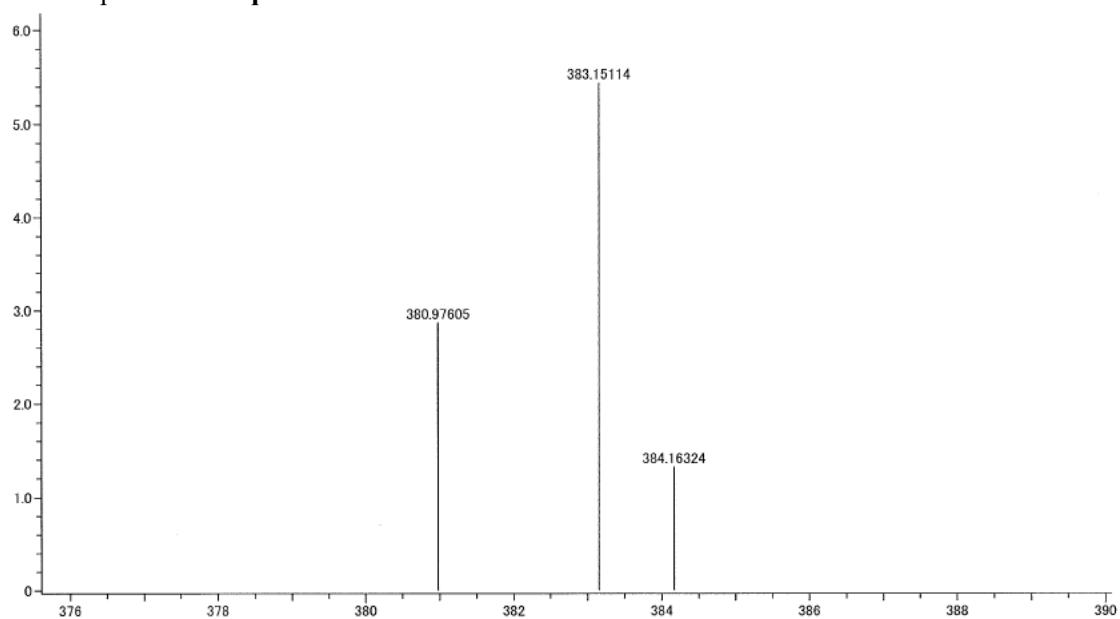



O=C1CC=C(C(=C1)C2=CC=CC=C2)N(C2=CC=CC=C2)C3=CC=CC=C3Br

**3r**

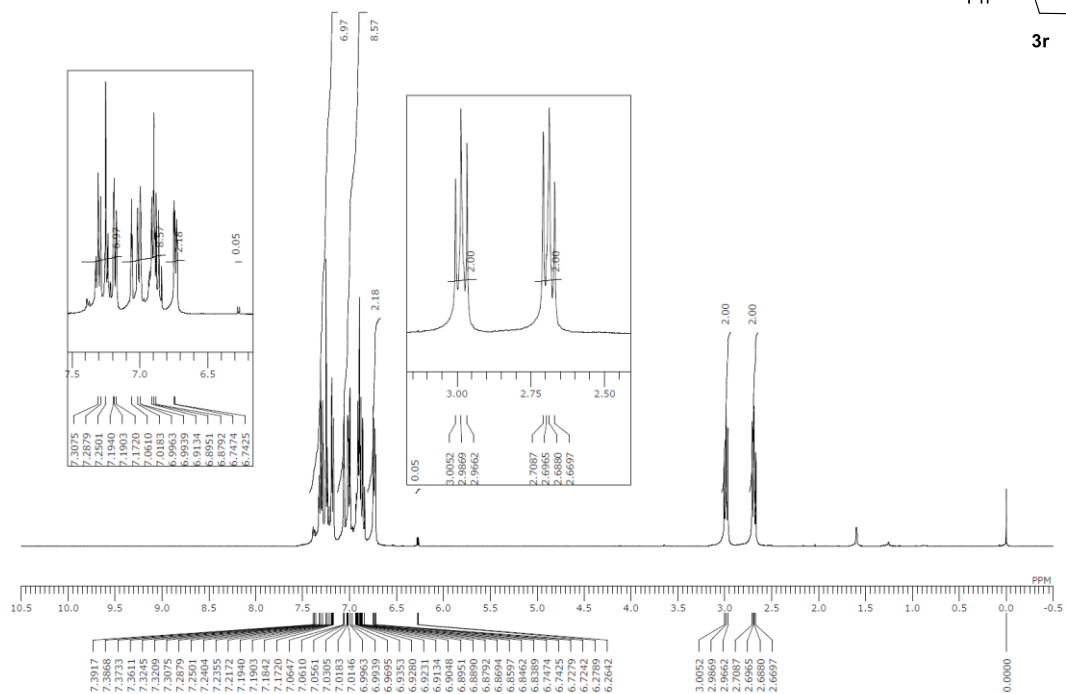

$^1\text{H}$ -NMR spectrum of **3r** ( $\text{CDCl}_3$ , 600 MHz)

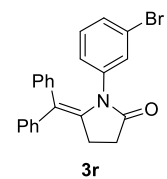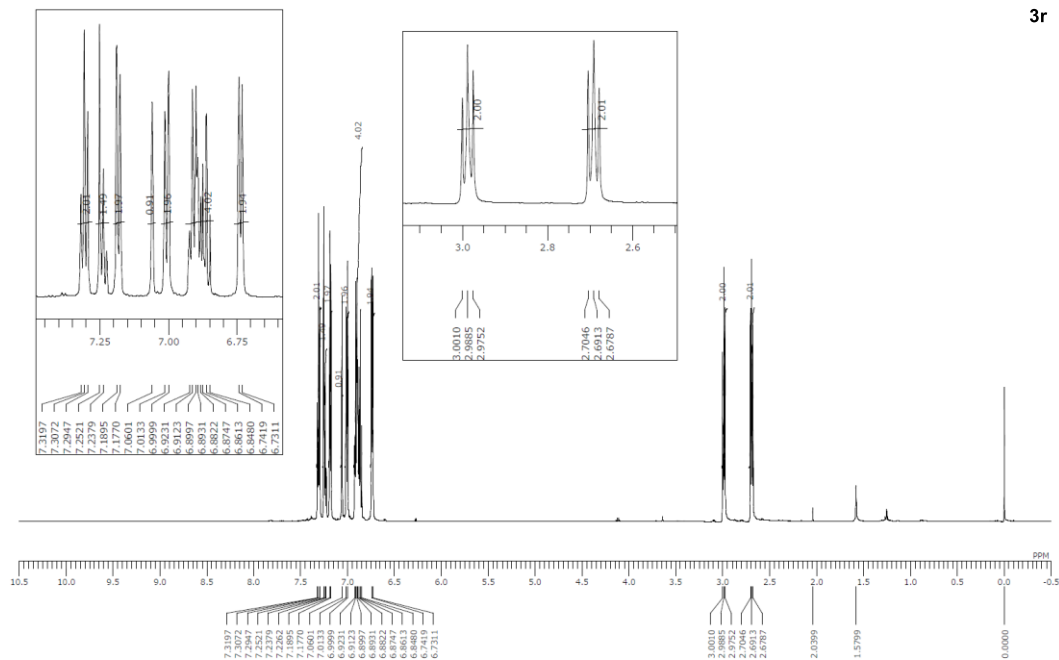

$^{13}\text{C}$ -NMR spectrum of **3r** ( $\text{CDCl}_3$ , 150 MHz)

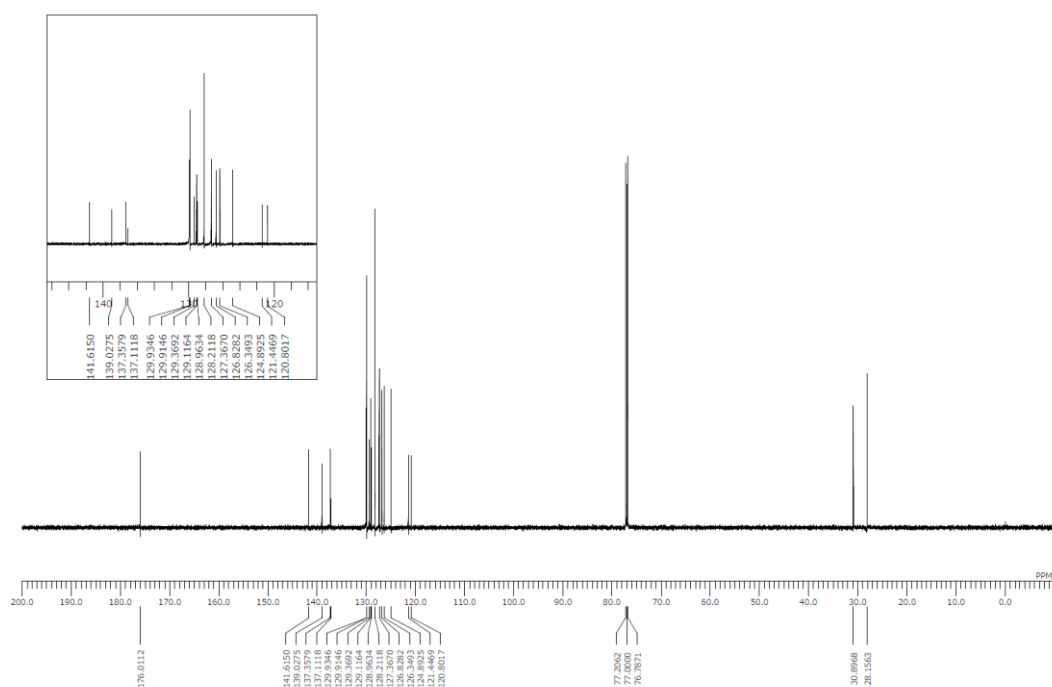

IR spectrum of **3r**

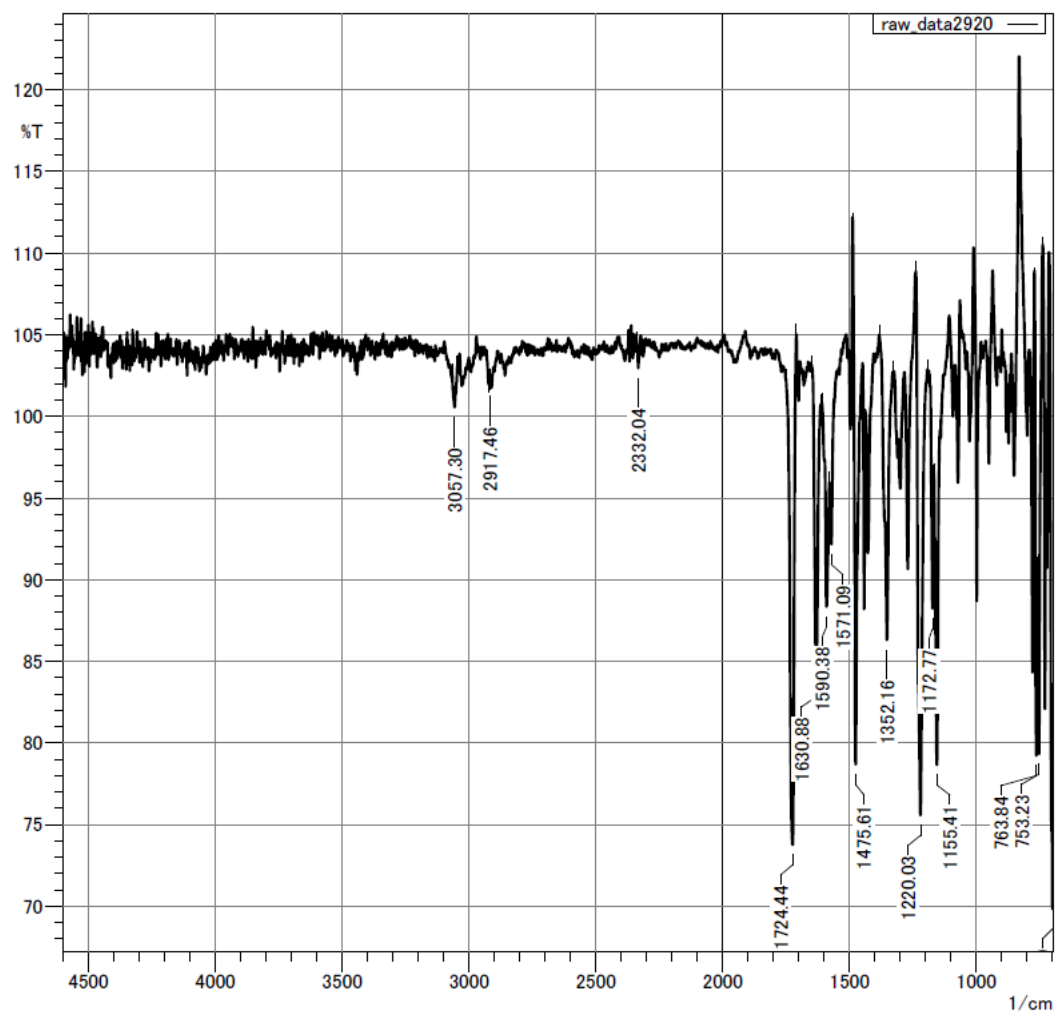

HRMS spectrum of **3r**

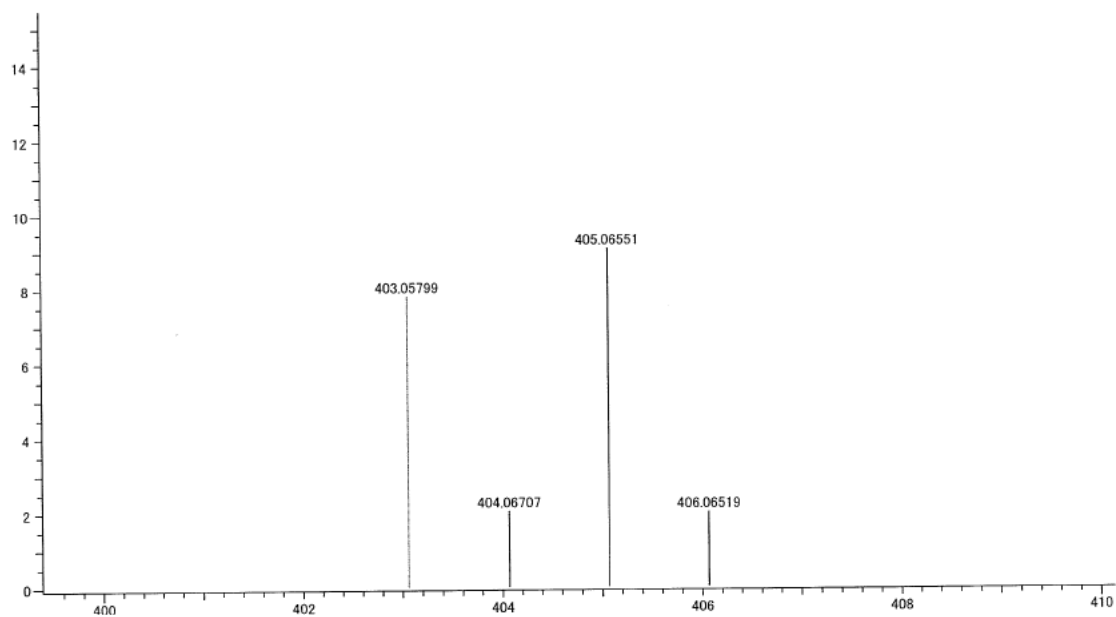

c1ccc2c(c1)c(c3ccccc3n2)S=C4C(=C5C(=CC(=C5)C(=O)N4C(=C6C=CC(=C6)C=C6)C=C6)C=C6  
**3s**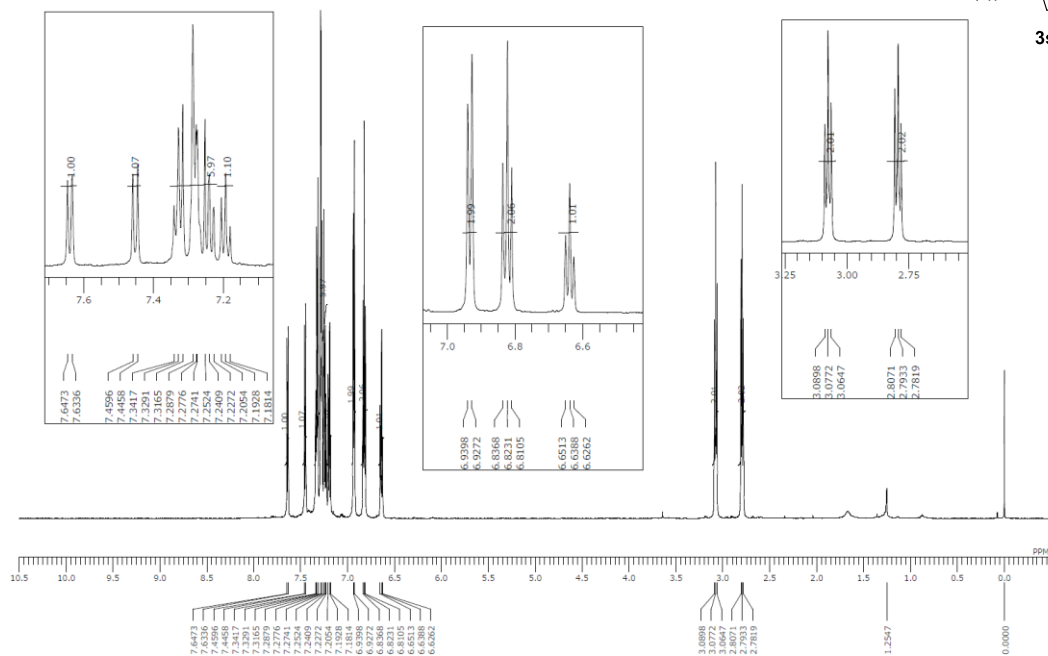

13C NMR spectrum of 1,4-dichlorobenzene. The spectrum shows peaks at 175.141, 154.2172, 148.2767, 140.5118, 140.5118, 134.8484, 134.8484, 131.6886, 131.6886, 128.9557, 128.9557, 127.2174, 127.2174, 125.4601, 125.4601, 122.6792, 122.6792, 120.7707, 77.2101, 77.0000, 76.9803, 31.5006, and 28.5208 ppm. The x-axis ranges from 200.0 to 0.0 ppm.

IR spectrum of **3s**

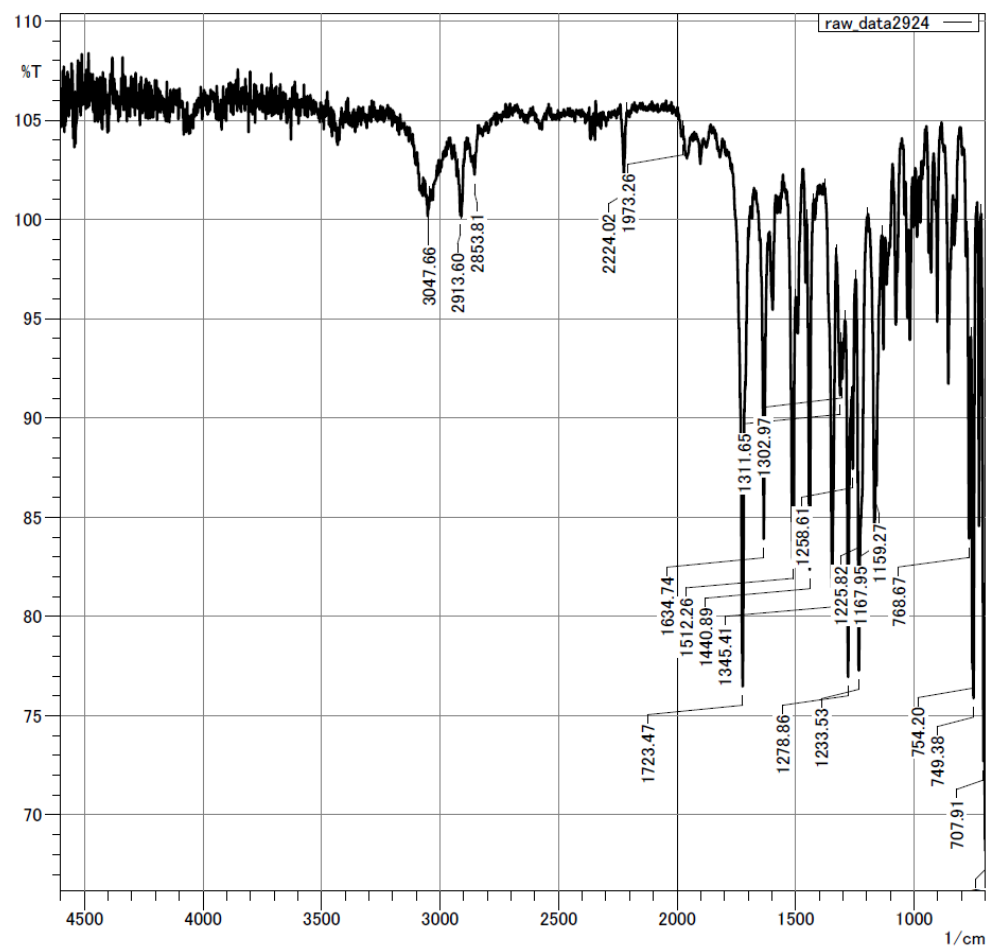

HRMS spectrum of **3s**

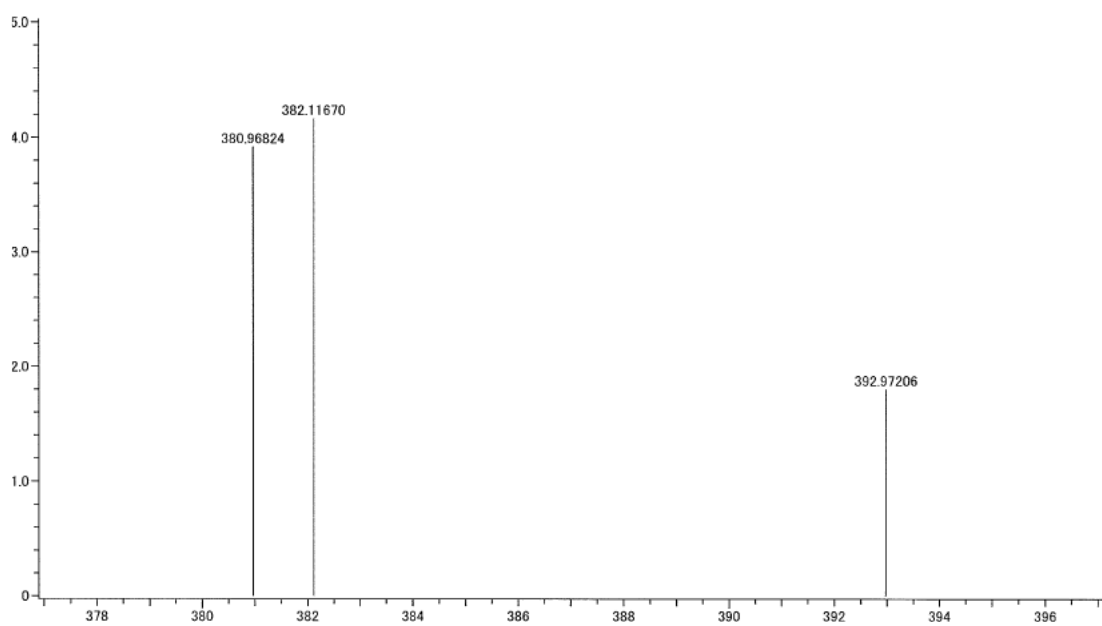

$^1\text{H}$ -NMR spectrum of **4a** ( $\text{CDCl}_3$ , 600 MHz)

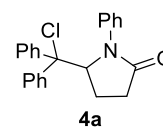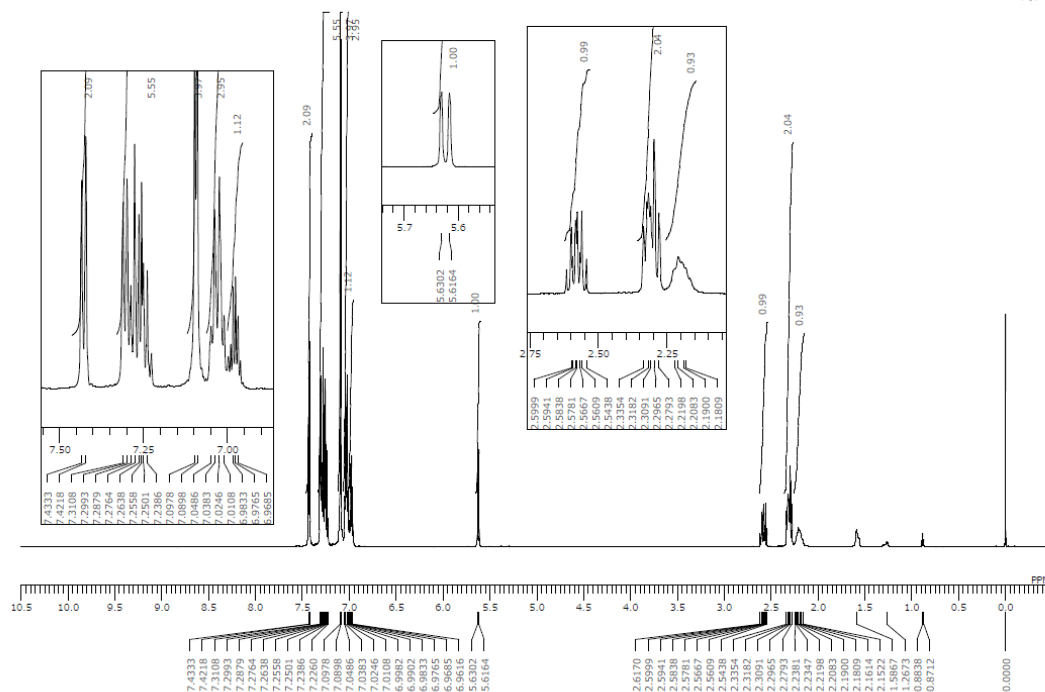

$^{13}\text{C}$ -NMR spectrum of **4a** ( $\text{CDCl}_3$ , 150 MHz)

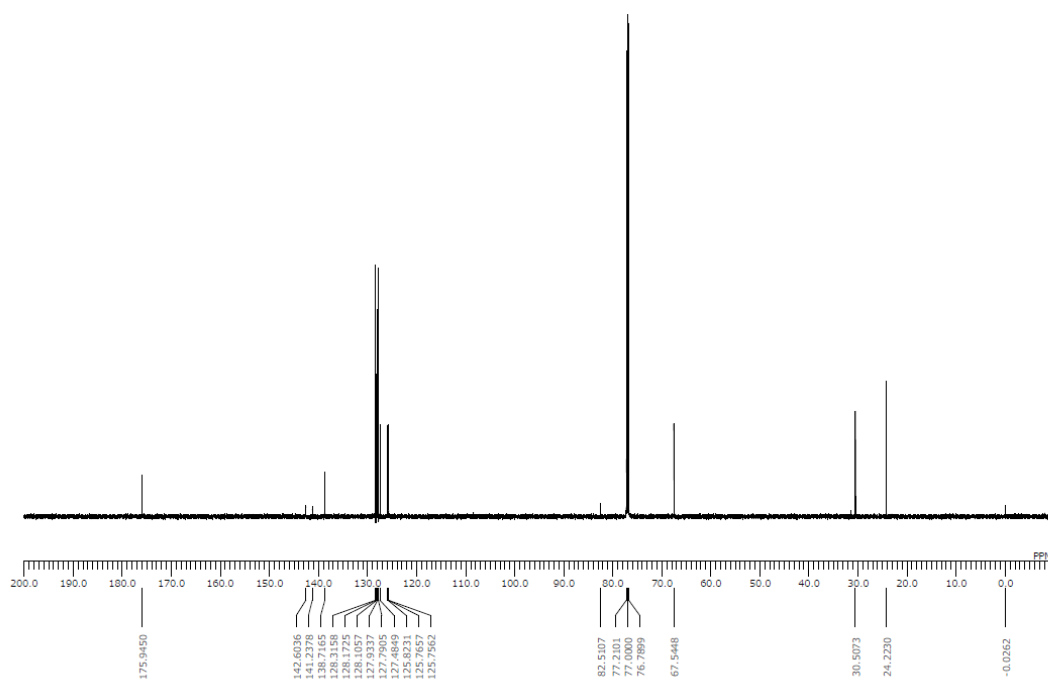

IR spectrum of **4a**

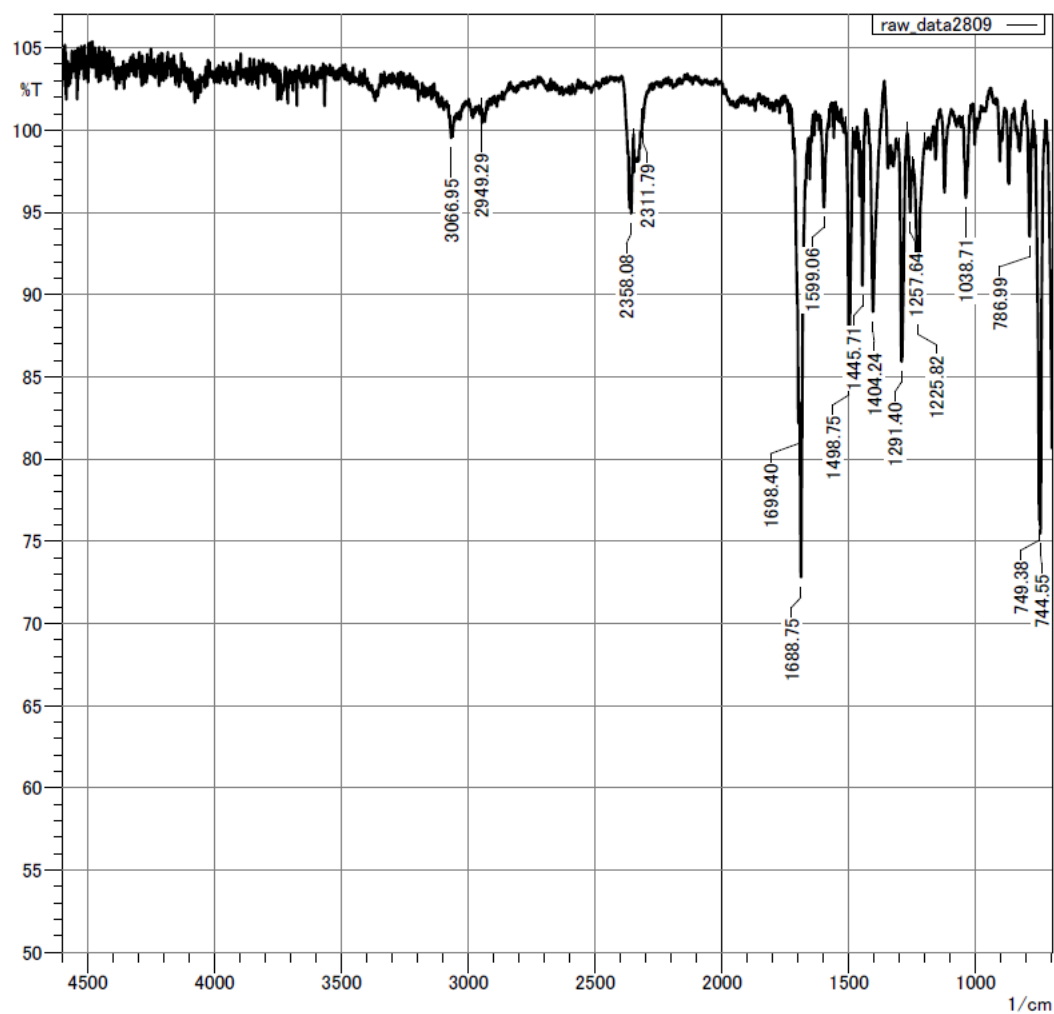

HRMS spectrum of **4a**

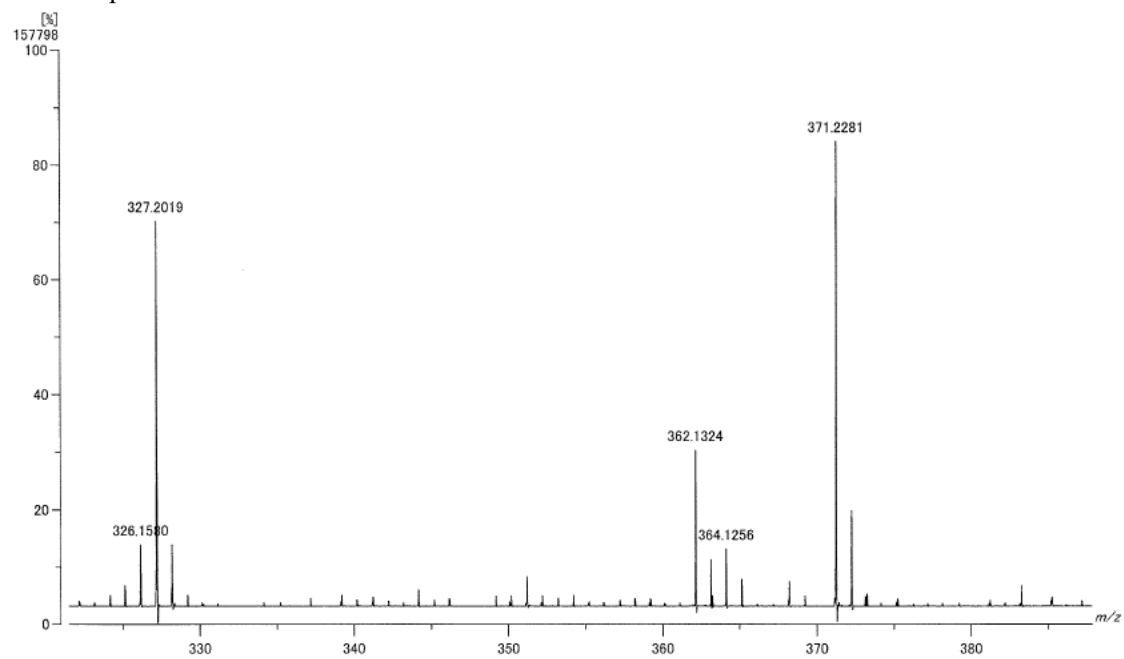

Supplement: s1 [file s1]
